# Supplementary material for: Electrochemical multicomponent [2+2+1] cascade cyclization of enaminones and primary amines towards the synthesis of 4-acylimidazoles
Source: Royal Society of Chemistry journal article supplement (doi:10.1039/d3cc06196e), 2024-01-01

**An electrochemical multicomponent [2+2+1] cascade  
cyclization of enaminones with primary amines: access to 1,2-  
disubstituted 4-acylimidazoles**

Mingxu Wang <sup>a</sup>, Ying Gao <sup>a</sup>, Xiao-Jing Zhao, Lu Gao <sup>a,\*</sup>, Yonghui He <sup>a,\*</sup>

Key Laboratory of Chemistry in Ethnic Medicinal Resources, State Ethnic Affairs Commission & Ministry of Education; Key Laboratory of Natural Products Synthetic Biology of Ethnic Medicinal Endophytes, State Ethnic Affairs Commission, School of Ethnic Medicine, Yunnan Minzu University Kunming, 650500, China.

E-mail: gl990@foxmail.com; heyonghui@ymu.edu.cn.

# Supporting Information

## Contents

|                                         |     |
|-----------------------------------------|-----|
| (A) Materials and equipment.....        | S1  |
| (B) Typical experimental procedure..... | S1  |
| (C) Cyclic voltammetry experiments..... | S7  |
| (D) X-Ray crystallographic studies..... | S8  |
| (E) Analytical data for products.....   | S11 |
| (F) Spectra.....                        | S29 |

## (A) Materials and equipment

All solvents and reagents were obtained from commercial sources and were purified following the standard procedure prior to use. All glassware was oven-dried at 110 °C for hours and cooled down under a vacuum. Unless otherwise noted, materials were obtained from commercial suppliers and used without further purification. The instrument for electrolysis was a dual display potentiostat (DJS-292B) (made in China). The anode was platinum plate ( 10 mm × 10 mm × 0.2 mm ), and the cathode was nickel plate ( 10 mm × 10 mm × 0.2 mm ). Thin layer chromatography (TLC) employed glass 0.25 mm silica gel plates. Flash chromatography columns were packed with 200- 300 mesh silica gel in petroleum (bp. 60-90°C). <sup>1</sup>H, <sup>13</sup>C and <sup>19</sup>F NMR data for all compounds were recorded with Bruker Advance III (400 MHz) spectrometers with tetramethylsilane as an internal standard. All chemical shifts (δ) are reported in ppm and coupling constants (J) in Hz. All chemical shifts are reported relative to tetramethylsilane and D-solvent peaks (77.00 ppm, chloroform; 39.50 ppm, Dimethyl Sulfoxide), respectively. Highresolution mass spectral analysis (HRMS) data were measured on a Waters Acquity UPLC I-Class plus Xevo G2-XS (Q-TOF) mass spectrum by means of the ESI technique. **Crystallographic data** were obtained from a Bruker D8 Ovest diffractometer.

## (B) Typical experimental procedure

### 1. General procedure for the synthesis of enaminones **1**:

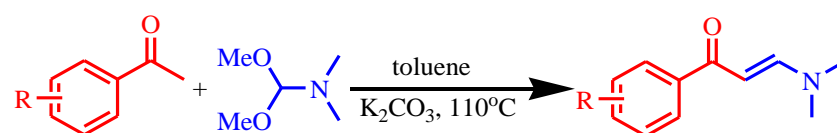

To a stirred solution of ketone (5.0 mmol, 1.0 equiv) in 5.0 mL of toluene, 1, 1-dimethoxy-N, N-dimethylmethanamine (7.0 mmol, 1.4 equiv) and K<sub>2</sub>CO<sub>3</sub> (5.0 mmol, 1.0 equiv) was added and stirred at 110 °C. After completion of the reaction (monitored by TLC), The resulting brown mixture was concentrated under a vacuum, the crude product was purified by flash column chromatography using petroleum ether/EtOAc (1:1) to give the enaminones **1**.<sup>[1]</sup>

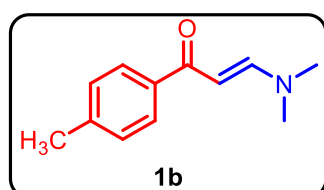

**(E)-3-(dimethylamino)-1-(p-tolyl)prop-2-en-1-one (1b)**

According to the general procedure, **1b** was obtained using 1-(p-tolyl)ethan-1-one (670.9 mg, 668.2  $\mu$ L, 5 mmol) and 1,1-dimethoxy-N,N-dimethylmethanamine (834.12 mg, 929.9  $\mu$ L, 7 mmol) in 75% yield (708.8 mg) as a yellow solid (silica gel flash chromatography: petroleum ether/EtOAc = 1:1).

<sup>1</sup>H NMR (400 MHz, CDCl<sub>3</sub>)  $\delta$  7.815 - 7.778 (m, 3H), 7.208 (d,  $J$  = 7.6 Hz, 2H), 5.712 (d,  $J$  = 12.4 Hz, 1H), 3.117 (s, 3H), 2.937 (s, 3H), 2.384 (s, 3H).

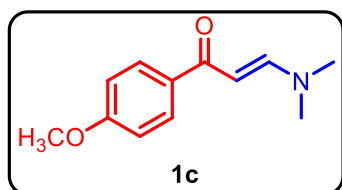

**(E)-3-(dimethylamino)-1-(4-methoxyphenyl)prop-2-en-1-one (1c)**

According to the general procedure, **1c** was obtained using 1-(4-methoxyphenyl)ethan-1-one (751.0 mg, 694.1  $\mu$ L, 5 mmol) and 1,1-dimethoxy-N,N-dimethylmethanamine (834.12 mg, 929.9  $\mu$ L, 7 mmol) in 82% yield (840.5 mg) as a yellow solid (silica gel flash chromatography: petroleum ether/EtOAc = 1:1).

<sup>1</sup>H NMR (400 MHz, CDCl<sub>3</sub>)  $\delta$  7.896 - 7.854 (m, 2H), 7.750 (d,  $J$  = 12.4 Hz, 1H), 6.899 - 6.862 (m, 2H), 5.678 (d,  $J$  = 12.4 Hz, 1H), 3.811 (s, 3H), 3.053 (s, 3H), 2.913 (s, 3H).

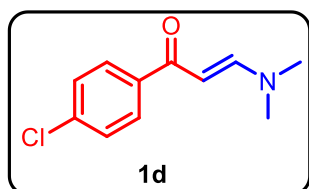

**(E)-1-(4-chlorophenyl)-3-(dimethylamino)prop-2-en-1-one (1d)**

According to the general procedure, **1d** was obtained using 1-(4-chlorophenyl)ethan-1-one (773.0 mg, 664.6  $\mu$ L, 5 mmol) and 1,1-dimethoxy-N,N-dimethylmethanamine (834.12 mg, 929.9  $\mu$ L, 7 mmol) in 83% yield (867.4 mg) as a yellow solid (silica gel flash chromatography: petroleum ether/EtOAc = 1:1).

<sup>1</sup>H NMR (400 MHz, CDCl<sub>3</sub>)  $\delta$  7.840 - 7.777 (m, 3H), 7.374 - 7.347 (m, 2H), 5.647 (d,  $J$  = 12.0 Hz, 1H), 3.139 (s, 3H), 2.913 (s, 3H).

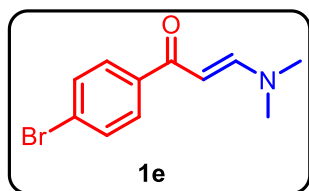

**(E)-1-(4-bromophenyl)-3-(dimethylamino)prop-2-en-1-one (1e)**

According to the general procedure, **1e** was obtained using 1-(4-bromophenyl)ethan-1-one (995.2 mg, 604.27  $\mu\text{L}$ , 5 mmol) and 1,1-dimethoxy-N,N-dimethylmethanamine (834.12 mg, 929.9  $\mu\text{L}$ , 7 mmol) in 86% yield (1092.2 mg) as a yellow solid (silica gel flash chromatography: petroleum ether/EtOAc = 1:1).

$^1\text{H NMR}$  (400 MHz,  $\text{CDCl}_3$ )  $\delta$  7.808 - 7.736 (m, 3H), 7.537 - 7.503 (m, 2H), 5.640 (d,  $J = 12.4$  Hz, 1H), 3.138 (s, 3H), 2.910 (s, 3H).

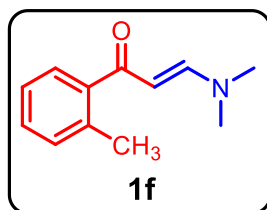

**(E)-3-(dimethylamino)-1-(o-tolyl)prop-2-en-1-one (1f)**

According to the general procedure, **1f** was obtained using 1-(o-tolyl)ethan-1-one (670.9 mg, 668.2  $\mu\text{L}$ , 5 mmol) and 1,1-dimethoxy-N,N-dimethylmethanamine (834.12 mg, 929.9  $\mu\text{L}$ , 7 mmol) in 83% yield (784.4 mg) as a yellow solid (silica gel flash chromatography: petroleum ether/EtOAc = 1:1).

$^1\text{H NMR}$  (400 MHz,  $\text{CDCl}_3$ )  $\delta$  7.361 - 7.182 (m, 5H), 5.362 (d,  $J = 12.8$  Hz, 1H), 3.036 (s, 3H), 2.867 (s, 3H), 2.423 (s, 3H).

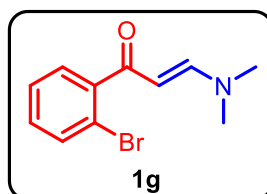

**(E)-1-(2-bromophenyl)-3-(dimethylamino)prop-2-en-1-one (1g)**

According to the general procedure, **1g** was obtained using 1-(2-bromophenyl)ethan-1-one (995.2 mg, 604.27  $\mu\text{L}$ , 5 mmol) and 1,1-dimethoxy-N,N-dimethylmethanamine (834.12 mg, 929.9  $\mu\text{L}$ , 7 mmol) in 74% yield (939.8 mg) as a yellow solid (silica gel flash chromatography: petroleum ether/EtOAc = 1:1).

<sup>1</sup>H NMR (400 MHz, CDCl<sub>3</sub>) δ 7.827 - 7.802 (m, 1H), 7.364 - 7.318 (m, 4H), 5.640 (d, *J* = 12.4 Hz, 1H), 2.871 (s, 3H), 2.801 (s, 3H).

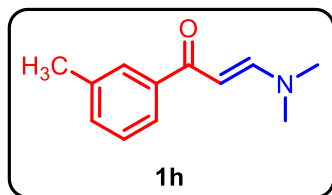

**(*E*)-3-(dimethylamino)-1-(*m*-tolyl)prop-2-en-1-one (1h)**

According to the general procedure, **1h** was obtained using 1-(*m*-tolyl)ethan-1-one (670.9 mg, 668.2 μL, 5 mmol) and 1,1-dimethoxy-*N,N*-dimethylmethanamine (834.12 mg, 929.9 μL, 7 mmol) in 82% yield (774.9 mg) as a yellow solid (silica gel flash chromatography: petroleum ether/EtOAc = 1:1).

<sup>1</sup>H NMR (400 MHz, CDCl<sub>3</sub>) δ 7.664 - 7.557 (m, 3H), 7.176 - 7.107 (m, 2H), 5.600 - 5.551 (m, 1H), 2.920 (s, 3H), 2.725 (s, 3H), 2.275 - 2.255 (s, 3H).

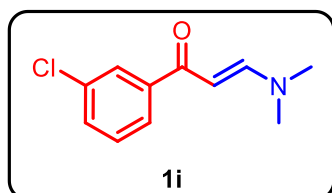

**(*E*)-1-(3-chlorophenyl)-3-(dimethylamino)prop-2-en-1-one (1i)**

According to the general procedure, **1i** was obtained using 1-(3-chlorophenyl)ethan-1-one (773.0 mg, 664.6 μL, 5 mmol) and 1,1-dimethoxy-*N,N*-dimethylmethanamine (834.12 mg, 929.9 μL, 7 mmol) in 78% yield (815.1 mg) as a yellow solid (silica gel flash chromatography: petroleum ether/EtOAc = 1:1).

<sup>1</sup>H NMR (400 MHz, CDCl<sub>3</sub>) δ 7.813 - 7.695 (m, 3H), 7.375 - 7.343 (m, 1H), 7.309-7.266 (m, 1H), 5.596 (d, *J* = 12.4 Hz, 1H), 3.108 (s, 3H), 2.883 (s, 3H).

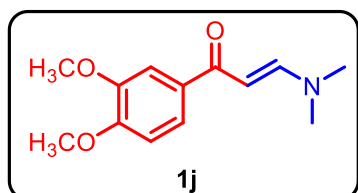

**(*E*)-1-(3,4-dimethoxyphenyl)-3-(dimethylamino)prop-2-en-1-one (1j)**

According to the general procedure, **1j** was obtained using 1-(3,4-dimethoxyphenyl)ethan-1-one (901.0 mg, 799.3 μL, 5 mmol) and 1,1-dimethoxy-*N,N*-dimethylmethanamine (834.12 mg, 929.9 μL, 7 mmol) in 53% yield (622.8 mg) as a yellow solid (silica gel flash chromatography: petroleum

ether/EtOAc = 1:1).

$^1\text{H NMR}$  (400 MHz,  $\text{CDCl}_3$ )  $\delta$  7.750 (d,  $J = 12.4$  Hz, 1H), 7.526 (d,  $J = 2.0$  Hz, 1H), 7.471 (dd,  $J = 8.4, 2.0$  Hz, 1H), 6.828 (d,  $J = 8.4$  Hz, 1H), 5.682 (d,  $J = 12.4$  Hz, 1H), 3.898 (d,  $J = 10.8$  Hz, 6H), 3.053 (s, 3H), 2.918 (s, 3H).

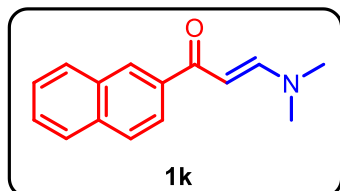

**(E)-3-(dimethylamino)-1-(naphthalen-2-yl)prop-2-en-1-one (1k)**

According to the general procedure, **1k** was obtained using 1-(naphthalen-2-yl)ethan-1-one (850.0 mg, 5 mmol) and 1,1-dimethoxy-N,N-dimethylmethanamine (834.12 mg, 929.9  $\mu\text{L}$ , 7 mmol) in 77% yield (866.5 mg) as a yellow solid (silica gel flash chromatography: petroleum ether/EtOAc = 1:1).

$^1\text{H NMR}$  (400 MHz,  $\text{CDCl}_3$ )  $\delta$  8.390 (s, 1H), 8.008 (dd,  $J = 8.4, 1.6$  Hz, 1H), 7.932 - 7.898 (m, 1H), 7.856 - 7.809 (m, 3H), 7.526 - 7.454 (m, 2H), 5.840 (d,  $J = 12.4$  Hz, 1H), 3.078 (s, 3H), 2.899 (s, 3H).

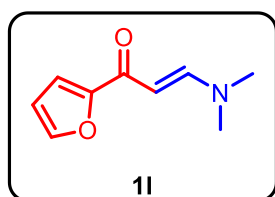

**(E)-3-(dimethylamino)-1-(furan-2-yl)prop-2-en-1-one (1l)**

According to the general procedure, **1l** was obtained using 1-(furan-2-yl)ethan-1-one (550.2 mg, 5 mmol) and 1,1-dimethoxy-N,N-dimethylmethanamine (834.12 mg, 929.9  $\mu\text{L}$ , 7 mmol) in 81% yield (668.3 mg) as a yellow solid (silica gel flash chromatography: petroleum ether/EtOAc = 1:1).

$^1\text{H NMR}$  (400 MHz,  $\text{CDCl}_3$ )  $\delta$  7.676 - 7.599 (m, 1H), 7.374 - 7.341 (m, 1H), 6.945 - 6.898 (m, 1H), 6.358 - 6.308 (m, 1H), 5.563 - 5.489 (m, 1H), 2.944 (s, 3H), 2.731 (s, 3H).

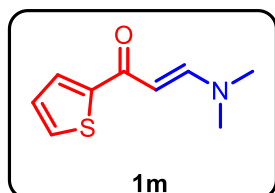

**(E)-3-(dimethylamino)-1-(thiophen-2-yl)prop-2-en-1-one (1m)**

According to the general procedure, **1m** was obtained using 1-(thiophen-2-yl)ethan-1-one (630.0

mg, 5 mmol) and 1,1-dimethoxy-N,N-dimethylmethanamine (834.12 mg, 929.9  $\mu\text{L}$ , 7 mmol) in 79% yield (715.0 mg) as a yellow solid (silica gel flash chromatography: petroleum ether/EtOAc = 1:1).

$^1\text{H NMR}$  (400 MHz,  $\text{CDCl}_3$ )  $\delta$  7.758 - 7.704 (m, 1H), 7.601 - 7.575 (m, 1H), 7.443 - 7.414 (m, 1H), 7.057 - 7.019 (m, 1H), 5.609 - 5.563 (m, 1H), 3.069 (s, 3H), 2.871 (s, 3H).

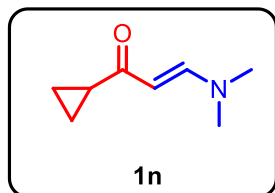

**(E)-1-cyclopropyl-3-(dimethylamino)prop-2-en-1-one (1n)**

According to the general procedure, **1n** was obtained using 1-cyclopropylethan-1-one (420.3 mg, 5 mmol) and 1,1-dimethoxy-N,N-dimethylmethanamine (834.12 mg, 929.9  $\mu\text{L}$ , 7 mmol) in 58% yield (403.4 mg) as a yellow solid (silica gel flash chromatography: petroleum ether/EtOAc = 1:1).

$^1\text{H NMR}$  (400 MHz,  $\text{CDCl}_3$ )  $\delta$  7.500 - 7.457 (m, 1H), 5.142 - 5.101 (m, 1H), 3.041 - 2.763 (m, 6H), 1.761 - 1.691 (m, 1H), 0.925 - 0.878 (m, 2H), 0.687 - 0.632 (m, 2H).

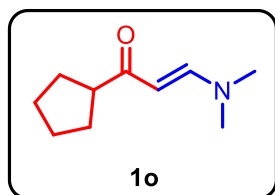

**(E)-1-cyclopentyl-3-(dimethylamino)prop-2-en-1-one (1o)**

According to the general procedure, **1o** was obtained using 1-cyclopentylethan-1-one (560.4 mg, 5 mmol) and 1,1-dimethoxy-N,N-dimethylmethanamine (834.12 mg, 929.9  $\mu\text{L}$ , 7 mmol) in 69% yield (576.2 mg) as a yellow solid (silica gel flash chromatography: petroleum ether/EtOAc = 1:1).

$^1\text{H NMR}$  (400 MHz,  $\text{CDCl}_3$ )  $\delta$  7.460 (d,  $J = 12.8$  Hz, 1H), 4.978 (d,  $J = 12.4$  Hz, 1H), 2.935 - 2.708 (m, 6H), 2.228 - 2.118 (s, 1H), 1.727 - 1.451 (m, 8H).

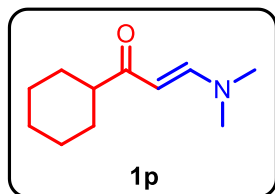

**(E)-1-cyclohexyl-3-(dimethylamino)prop-2-en-1-one (1p)**

According to the general procedure, **1p** was obtained using 1-cyclohexylethan-1-one (630.5 mg, 5 mmol) and 1,1-dimethoxy-N,N-dimethylmethanamine (834.12 mg, 929.9  $\mu\text{L}$ , 7 mmol) in 14% yield



(127.0 mg) as a yellow solid (silica gel flash chromatography: petroleum ether/EtOAc = 1:1).

$^1\text{H NMR}$  (400 MHz,  $\text{CDCl}_3$ )  $\delta$  7.405 - 7.305 (m, 1H), 4.903 - 4.756 (m, 1H), 2.872 - 2.640 (m, 6H), 2.138 - 1.965 (m, 1H), 1.642 - 1.410 (m, 5H), 1.281 - 0.975 (m, 5H).

## 2. General procedure for the synthesis of products **3**.

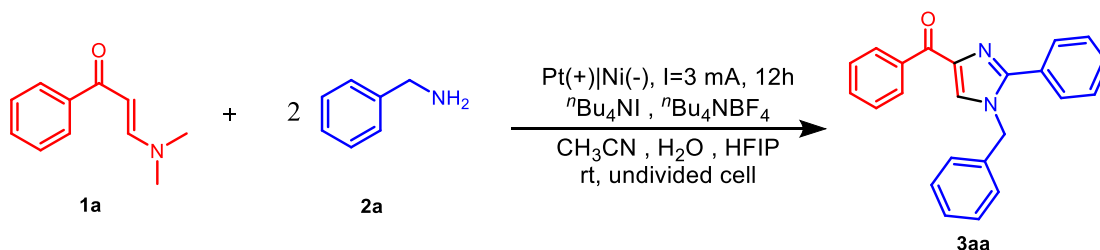

A 10-mL oven-dried undivided three-necked bottle was equipped with Pt plate anode (10 mm  $\times$  10 mm  $\times$  0.2 mm), Ni plate cathode (10 mm  $\times$  10 mm  $\times$  0.2 mm), constant current = 3 mA, **1a** (0.2 mmol), **2a** (0.4 mmol),  $^n\text{Bu}_4\text{NI}$  (0.6 mmol),  $^n\text{Bu}_4\text{NBF}_4$  (0.2 mmol),  $\text{H}_2\text{O}$  (0.5 mL), HFIP (0.5 mL),  $\text{CH}_3\text{CN}$  (8 mL), room temperature, undivided cell. Then stirred for 12 h. The resulting brown mixture was concentrated under a vacuum, the crude product was purified by flash column chromatography using petroleum ether/EtOAc (6:1) to give the title compounds **3aa**.

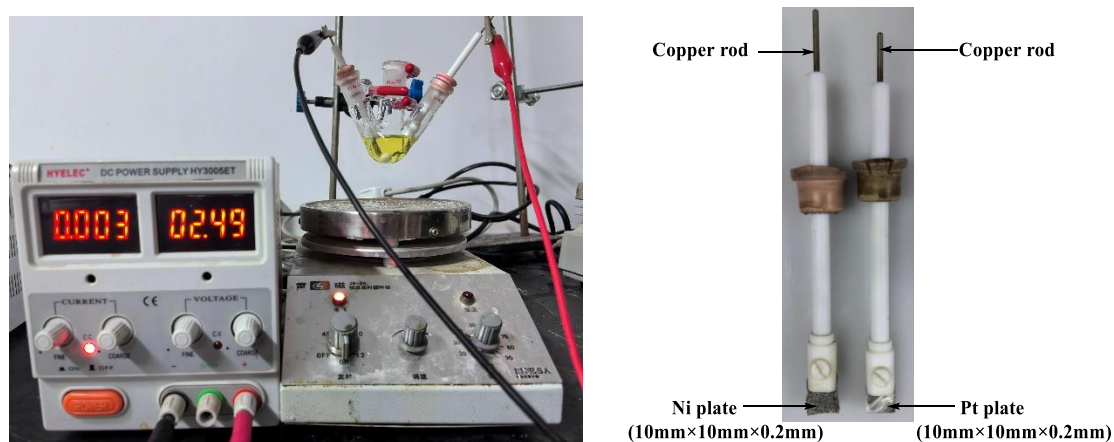

**Figure S1** Electrolysis setup

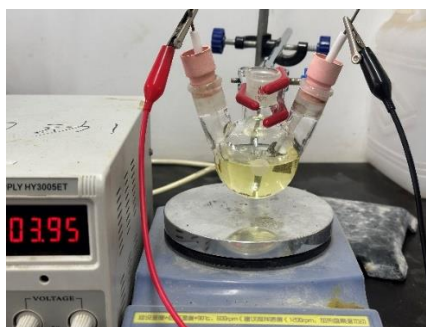

**Figure S2** Gram-scale amplification Electrolysis setup

### (C) Cyclic voltammetry experiments

Cyclic voltammetry was performed in a three-electrode cell connected to a schlenk line under nitrogen at room temperature. The working electrode was a steady glassy carbon disk electrode, the counter electrode a platinum wire. The reference was an Ag/AgCl electrode submerged in saturated aqueous KCl solution. 8 mL of CH<sub>3</sub>CN were poured into the electrochemical cell in all experiments. The scan rate is 0.1 V/s, ranging from -0.2 V to 3.5 V.

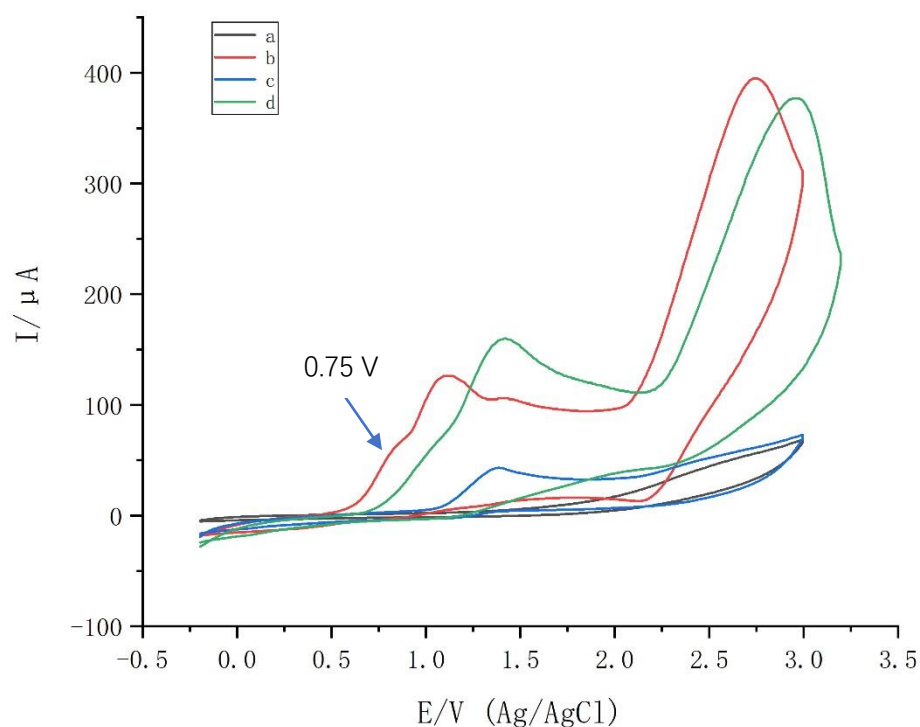

**Figure S3** Cyclic voltammograms of in 8 mL of CH<sub>3</sub>CN solution containing different compounds: (a) CH<sub>3</sub>CN (8 mL), tetrabutylammonium tetrafluoroborate (0.02 mmol), benzylamine (0.04 mmol); (b) CH<sub>3</sub>CN (8 mL), tetrabutylammonium tetrafluoroborate (0.02 mmol), tetrabutylammonium iodide (0.06 mmol); (c) CH<sub>3</sub>CN (8 mL), tetrabutylammonium tetrafluoroborate (0.02 mmol), 3-(Dimethylamino)-1-phenyl-2-propen-1-one (0.02 mmol); (d) CH<sub>3</sub>CN (8 mL), tetrabutylammonium tetrafluoroborate (0.02 mmol), tetrabutylammonium iodide (0.06 mmol), 3-(Dimethylamino)-1-phenyl-2-propen-1-one (0.02 mmol).

### (D) X-Ray crystallographic studies

Crystal data for md\_zxj4:  $C_{23}H_{18}N_2O$ ,  $M = 338.39$ ,  $a = 6.2987(4)$  Å,  $b = 7.8754(5)$  Å,  $c = 36.641(2)$  Å,  $\alpha = 90^\circ$ ,  $\beta = 90^\circ$ ,  $\gamma = 90^\circ$ ,  $V = 1817.6(2)$  Å<sup>3</sup>,  $T = 150.(2)$  K, space group  $P212121$ ,  $Z = 4$ ,  $\mu(\text{Cu K}\alpha) = 0.601$  mm<sup>-1</sup>, 24679 reflections measured, 3343 independent reflections ( $R_{int} = 0.1563$ ). The final  $R_I$  values were 0.0706 ( $I > 2\sigma(I)$ ). The final  $wR(F^2)$  values were 0.2053 ( $I > 2\sigma(I)$ ). The final  $R_I$  values were 0.0800 (all data). The final  $wR(F^2)$  values were 0.2108 (all data). The goodness of fit on  $F^2$  was 1.096. Flack parameter = 0.1(3).

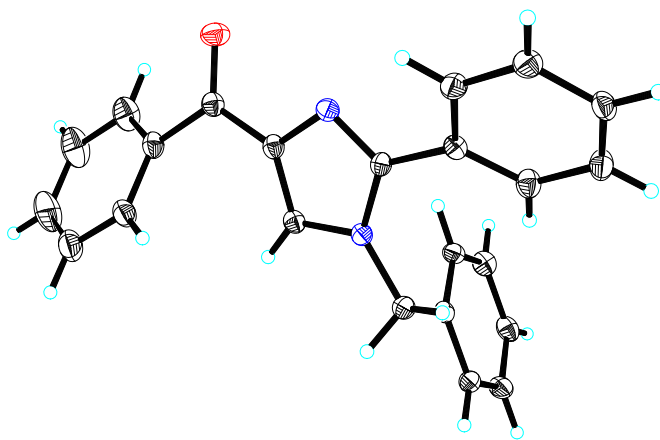

View of a molecule of md\_zxj4.

Displacement ellipsoids are drawn at the 30% probability level.

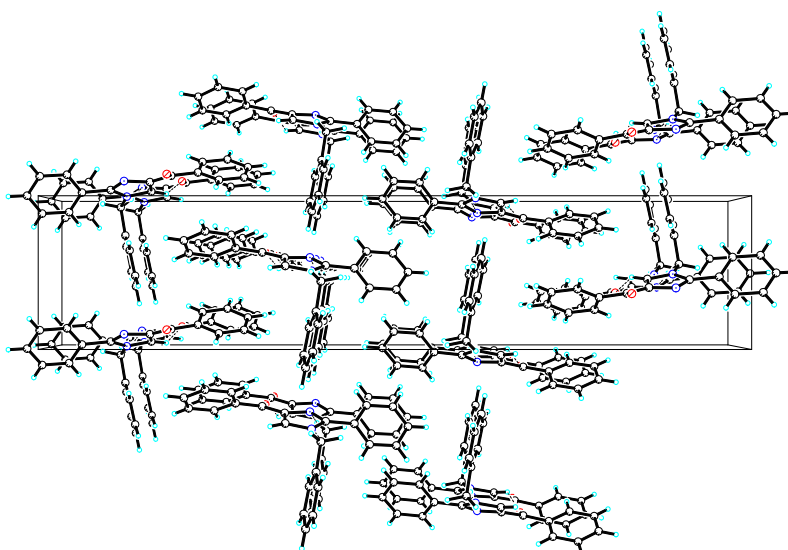

View of the pack drawing of md\_zxj4.

Hydrogen-bonds are shown as dashed lines.

Table 1. Crystal data and structure refinement for md\_zxj4\_0m.

|                                   |                                               |          |
|-----------------------------------|-----------------------------------------------|----------|
| Identification code               | global                                        |          |
| Empirical formula                 | C23 H18 N2 O                                  |          |
| Formula weight                    | 338.39                                        |          |
| Temperature                       | 150(2) K                                      |          |
| Wavelength                        | 1.54178 Å                                     |          |
| Crystal system                    | Orthorhombic                                  |          |
| Space group                       | P2 <sub>1</sub> 2 <sub>1</sub> 2 <sub>1</sub> |          |
| Unit cell dimensions              | a = 6.2987(4) Å                               | α = 90 ° |
|                                   | b = 7.8754(5) Å                               | β = 90 ° |
|                                   | c = 36.641(2) Å                               | γ = 90 ° |
| Volume                            | 1817.6(2) Å <sup>3</sup>                      |          |
| Z                                 | 4                                             |          |
| Density (calculated)              | 1.237 Mg/m <sup>3</sup>                       |          |
| Absorption coefficient            | 0.601 mm <sup>-1</sup>                        |          |
| F(000)                            | 712                                           |          |
| Crystal size                      | 0.460 x 0.030 x 0.030 mm <sup>3</sup>         |          |
| Theta range for data collection   | 2.41 to 68.52 °                               |          |
| Index ranges                      | -6<=h<=7, -9<=k<=9, -44<=l<=44                |          |
| Reflections collected             | 24679                                         |          |
| Independent reflections           | 3343 [R(int) = 0.1563]                        |          |
| Completeness to theta = 68.52 °   | 99.7 %                                        |          |
| Absorption correction             | Semi-empirical from equivalents               |          |
| Max. and min. transmission        | 0.98 and 0.80                                 |          |
| Refinement method                 | Full-matrix least-squares on F <sup>2</sup>   |          |
| Data / restraints / parameters    | 3343 / 0 / 236                                |          |
| Goodness-of-fit on F <sup>2</sup> | 1.096                                         |          |
| Final R indices [I>2σ(I)]         | R1 = 0.0706, wR2 = 0.2053                     |          |
| R indices (all data)              | R1 = 0.0800, wR2 = 0.2108                     |          |
| Absolute structure parameter      | 0.1(3)                                        |          |
| Extinction coefficient            | 0.0026(9)                                     |          |
| Largest diff. peak and hole       | 0.458 and -0.272 e.Å <sup>-3</sup>            |          |

## (E) Analytical data for products

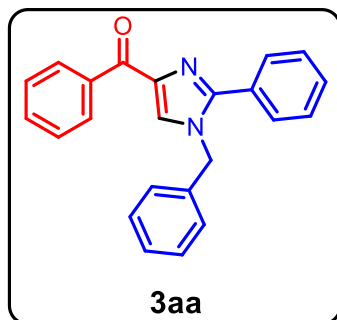

### (1-benzyl-2-phenyl-1*H*-imidazol-4-yl)(phenyl)methanone (**3aa**)

According to the general procedure, **3aa** was obtained using (*E*)-3-(dimethylamino)-1-phenylprop-2-en-1-one **1a** (35.0 mg, 0.2 mmol) and phenylmethanamine **2a** (42.8 mg, 43.6  $\mu$ L, 0.4 mmol) in 84% yield (56.8 mg) as a yellow solid (silica gel flash chromatography: petroleum ether/EtOAc = 6:1).

**<sup>1</sup>H NMR** (400 MHz, DMSO-*d*<sub>6</sub>)  $\delta$  8.256 - 8.228 (m, 3H), 7.641 - 7.600 (m, 3H), 7.533 (t, *J* = 8.0 Hz, 2H), 7.484 - 7.460 (m, 3H), 7.336 - 7.266 (m, 3H), 7.058 (d, *J* = 6.8 Hz, 2H), 5.442 (s, 2H);

**<sup>13</sup>C NMR** (100 MHz, DMSO-*d*<sub>6</sub>)  $\delta$  186.47, 147.82, 139.75, 137.79, 136.73, 132.29, 130.49, 129.86, 129.73, 129.40, 128.84, 128.74, 128.70, 128.24, 127.82, 126.82, 50.25.

**HRMS** (ESI) *m/z* calcd. for C<sub>23</sub>H<sub>19</sub>N<sub>2</sub>O (M+H)<sup>+</sup>: 339.1492, found 339.1487.

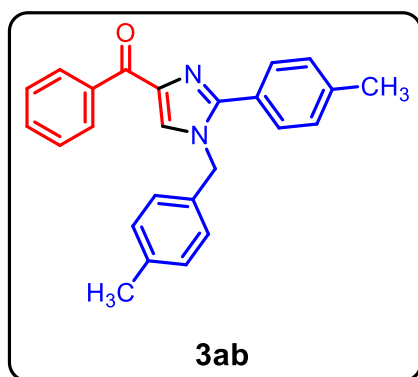

### (1-(4-methylbenzyl)-2-(*p*-tolyl)-1*H*-imidazol-4-yl)(phenyl)methanone (**3ab**)

According to the general procedure, **3ab** was obtained using (*E*)-3-(dimethylamino)-1-phenylprop-2-en-1-one **1a** (35.0 mg, 0.2 mmol) and *p*-tolylmethanamine **2b** (48.4 mg, 50.9  $\mu$ L, 0.4 mmol) in 61% yield (44.7 mg) as yellow oily liquid (silica gel flash chromatography: petroleum ether/EtOAc = 6:1).

**<sup>1</sup>H NMR** (400 MHz, CDCl<sub>3</sub>)  $\delta$  8.216 - 8.192 (m, 2H), 7.622 (s, 1H), 7.482 - 7.434 (m, 3H), 7.402 -

7.362 (m, 2H), 7.176 (d,  $J = 7.6$  Hz, 2H), 7.088 (d,  $J = 7.6$  Hz, 2H), 6.933 (d,  $J = 8.0$  Hz, 2H), 5.122 (s, 2H), 2.326 (s, 3H), 2.271 (s, 3H);

$^{13}\text{C}$  NMR (100 MHz,  $\text{CDCl}_3$ )  $\delta$  187.93, 149.22, 140.93, 139.74, 138.34, 138.21, 132.89, 132.26, 130.34, 129.94, 129.48, 129.23, 128.62, 128.23, 127.08, 126.89, 50.90, 21.50, 21.22.

HRMS (ESI)  $m/z$  calcd. for  $\text{C}_{25}\text{H}_{23}\text{N}_2\text{O}$  ( $\text{M}+\text{H}$ ) $^+$ : 367.1805, found 367.1799.

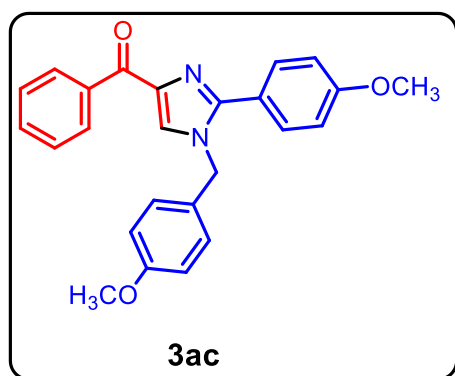

**(1-(4-methoxybenzyl)-2-(4-methoxyphenyl)-1H-imidazol-4-yl)(phenyl)methanone (3ac)**

According to the general procedure, **3ac** was obtained using (*E*)-3-(dimethylamino)-1-phenylprop-2-en-1-one **1a** (35.0 mg, 0.2 mmol) and (4-methoxyphenyl)methanamine **2c** (54.8 mg, 52.2  $\mu\text{L}$ , 0.4 mmol) in 62% yield (49.4 mg) as a yellow solid (silica gel flash chromatography: petroleum ether/EtOAc = 6:1).

$^1\text{H}$  NMR (400 MHz,  $\text{CDCl}_3$ )  $\delta$  8.272 - 8.284 (m, 2H), 7.671 (s, 1H), 7.572 - 7.502 (m, 3H), 7.447 (t,  $J = 7.6$  Hz, 2H), 7.032 (d,  $J = 8.8$  Hz, 2H), 6.958 (d,  $J = 8.8$  Hz, 2H), 6.864 (d,  $J = 8.8$  Hz, 2H), 5.151 (s, 2H), 3.835 (s, 3H), 3.786 (s, 3H);

$^{13}\text{C}$  NMR (100 MHz,  $\text{CDCl}_3$ )  $\delta$  187.90, 160.64, 159.66, 148.94, 140.73, 138.20, 132.23, 130.72, 130.26, 128.51, 128.47, 128.21, 127.82, 122.16, 114.61, 114.17, 55.45, 55.42, 50.61.

HRMS (ESI)  $m/z$  calcd. for  $\text{C}_{25}\text{H}_{23}\text{N}_2\text{O}_3$  ( $\text{M}+\text{H}$ ) $^+$ : 399.1703, found 399.1709.

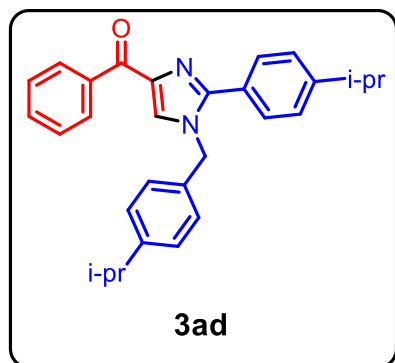

**(1-(4-isopropylbenzyl)-2-(4-isopropylphenyl)-1H-imidazol-4-yl)(phenyl)methanone (3ad)**

According to the general procedure, **3ad** was obtained using (*E*)-3-(dimethylamino)-1-phenylprop-2-en-1-one **1a** (35.0 mg, 0.2 mmol) and (4-isopropylphenyl)methanamine **2d** (59.6 mg, 0.4 mmol) in 74% yield (62.5 mg) as a yellow solid (silica gel flash chromatography: petroleum ether/EtOAc = 6:1).

**<sup>1</sup>H NMR** (400 MHz, CDCl<sub>3</sub>) δ 8.304 (d, *J* = 7.6 Hz, 2H), 7.717 (s, 1H), 7.575 - 7.517 (m, 3H), 7.458 (t, *J* = 7.6 Hz, 2H), 7.308 (d, *J* = 7.6 Hz, 2H), 7.219 (d, *J* = 8.0 Hz, 2H), 7.054 (d, *J* = 8.0 Hz, 2H), 5.221 (s, 2H), 2.973 - 2.890 (m, 2H), 1.281 - 1.236 (m, 12H);

**<sup>13</sup>C NMR** (100 MHz, CDCl<sub>3</sub>) δ 187.98, 150.65, 149.35, 149.25, 141.07, 138.20, 133.29, 132.30, 130.44, 129.35, 128.62, 128.24, 127.37, 127.20, 126.94, 50.92, 34.17, 33.95, 29.84, 24.04, 23.98.

**HRMS** (ESI) *m/z* calcd. for C<sub>29</sub>H<sub>31</sub>N<sub>2</sub>O (M+H)<sup>+</sup>: 423.2431, found 423.2437.

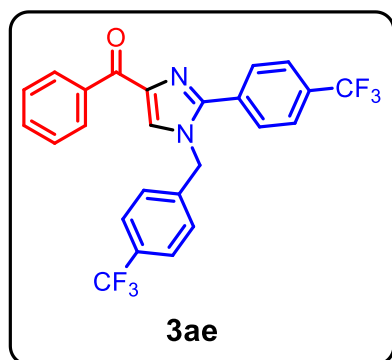

**Phenyl(1-(4-(trifluoromethyl)benzyl)-2-(4-(trifluoromethyl)phenyl)-1*H*-imidazol-4-yl)methanone (3ae)**

According to the general procedure, **3ae** was obtained using (*E*)-3-(dimethylamino)-1-phenylprop-2-en-1-one **1a** (35.0 mg, 0.2 mmol) and (4-(trifluoromethyl)phenyl)methanamine **2e** (70.0 mg, 0.4 mmol) in 72% yield (68.3 mg) as a yellow solid (silica gel flash chromatography: petroleum ether/EtOAc = 6:1).

**<sup>1</sup>H NMR** (400 MHz, CDCl<sub>3</sub>) δ 8.312 - 8.284 (m, 2H), 7.788 (s, 1H), 7.702 (s, 4H), 7.628 (d, *J* = 8.0 Hz, 2H), 7.569 - 7.541 (m, 1H), 7.494 - 7.454 (m, 2H), 7.207 (d, *J* = 8.0 Hz, 2H), 5.347 (s, 2H);

**<sup>13</sup>C NMR** (100 MHz, CDCl<sub>3</sub>) δ 187.56, 147.43, 141.79, 139.45, 137.70, 132.93, 132.70, 131.42 (dd, *J* = 33.3, 33.3 Hz), 130.34, 129.48, 129.06, 128.37, 127.38 (d, *J* = 26.3 Hz), 127.08, 126.46 (q, *J* = 7.1, 4.0 Hz), 125.93 (q, *J* = 8.1, 4.0 Hz), 125.18 (d, *J* = 4.0 Hz), 122.47 (d, *J* = 4.0 Hz), 50.72;

**<sup>19</sup>F NMR** (376 MHz, CDCl<sub>3</sub>) δ -62.76, -62.89.

**HRMS** (ESI) *m/z* calcd. for C<sub>25</sub>H<sub>17</sub>F<sub>6</sub>N<sub>2</sub>O (M+H)<sup>+</sup>: 475.1240, found 475.1233.

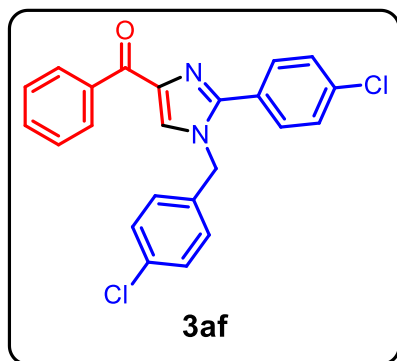

**(1-(4-chlorobenzyl)-2-(4-chlorophenyl)-1*H*-imidazol-4-yl)(phenyl)methanone (3af)**

According to the general procedure, **3af** was obtained using (*E*)-3-(dimethylamino)-1-phenyl prop-2-en-1-one **1a** (35.0 mg, 0.2 mmol) and (4-chlorophenyl)methanamine **2f** (56.4 mg, 0.4 mmol) in 66% yield (53.7 mg) as yellow oily liquid (silica gel flash chromatography: petroleum ether/EtOAc = 6:1).

**<sup>1</sup>H NMR** (400 MHz, CDCl<sub>3</sub>) δ 8.290 - 8.268 (m, 2H), 7.732 (s, 1H), 7.572 - 7.511 (m, 3H), 7.470 (t, *J* = 7.6 Hz, 2H), 7.416 (d, *J* = 8.4 Hz, 2H), 7.334 (d, *J* = 8.4 Hz, 2H), 7.018 (d, *J* = 8.4 Hz, 2H), 5.212 (s, 2H);

**<sup>13</sup>C NMR** (100 MHz, CDCl<sub>3</sub>) δ 187.69, 147.83, 141.41, 137.88, 136.09, 134.68, 134.08, 132.55, 130.50, 130.34, 129.63, 129.20, 128.74, 128.34, 128.25, 128.03, 50.56.

**HRMS** (ESI) *m/z* calcd. for C<sub>23</sub>H<sub>17</sub>Cl<sub>2</sub>N<sub>2</sub>O (M+H)<sup>+</sup>: 407.0712, found 407.0706.

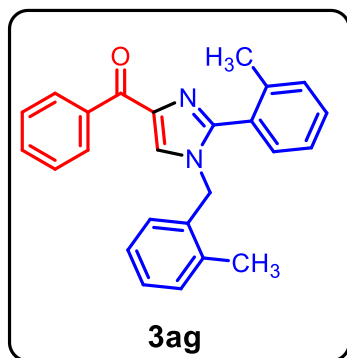

**(1-(2-methylbenzyl)-2-(o-tolyl)-1*H*-imidazol-4-yl)(phenyl)methanone (3ag)**

According to the general procedure, **3ag** was obtained using (*E*)-3-(dimethylamino)-1-phenyl prop-2-en-1-one **1a** (35.0 mg, 0.2 mmol) and o-tolylmethanamine **2g** (48.4 mg, 0.4 mmol) in 57% yield (41.7 mg) as yellow oily liquid (silica gel flash chromatography: petroleum ether/EtOAc = 6:1).

**<sup>1</sup>H NMR** (400 MHz, CDCl<sub>3</sub>) δ 8.214 (d, *J* = 7.6 Hz, 2H), 7.582 (s, 1H), 7.431 (t, *J* = 7.6 Hz, 1H),



7.357 (t,  $J = 7.6$  Hz, 2H), 7.285 (t,  $J = 7.6$  Hz, 1H), 7.224 (d,  $J = 7.6$  Hz, 2H), 7.174 - 7.126 (m, 2H), 7.098 - 7.049 (m, 2H), 6.872 (d,  $J = 7.6$  Hz, 1H), 4.867 (s, 2H), 2.186 (s, 3H), 1.987 (s, 3H);  
 $^{13}\text{C NMR}$  (100 MHz,  $\text{CDCl}_3$ )  $\delta$  188.04, 148.27, 140.93, 138.77, 138.05, 136.08, 133.40, 132.25, 130.93, 130.75, 130.43, 130.39, 130.00, 129.42, 128.77, 128.55, 128.19, 127.17, 126.73, 125.88, 48.98, 19.98, 18.98.

**HRMS** (ESI)  $m/z$  calcd. for  $\text{C}_{25}\text{H}_{23}\text{N}_2\text{O}$  ( $\text{M}+\text{H}$ ) $^+$ : 367.1805, found 367.1801.

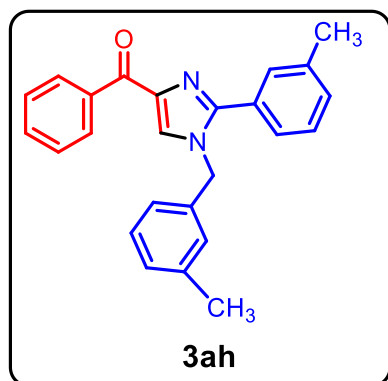

**(1-(3-methylbenzyl)-2-(m-tolyl)-1H-imidazol-4-yl)(phenyl)methanone (3ah)**

According to the general procedure, **3ah** was obtained using (*E*)-3-(dimethylamino)-1-phenylprop-2-en-1-one **1a** (35.0 mg, 0.2 mmol) and *m*-tolylmethanamine **2h** (48.4 mg, 49.6  $\mu\text{L}$ , 0.4 mmol) in 64% yield (46.8 mg) as a yellow solid (silica gel flash chromatography: petroleum ether/EtOAc = 6:1).

$^1\text{H NMR}$  (400 MHz,  $\text{CDCl}_3$ )  $\delta$  8.217 (d,  $J = 7.2$  Hz, 2H), 7.643 (s, 1H), 7.452 (t,  $J = 7.2$  Hz, 1H), 7.378 (t,  $J = 7.2$  Hz, 3H), 7.292 (d,  $J = 7.6$  Hz, 1H), 7.234 (t,  $J = 7.2$  Hz, 1H), 7.186 - 7.139 (m, 2H), 7.051 (d,  $J = 8.0$  Hz, 1H), 6.837 (s, 2H), 5.114 (s, 2H), 2.297 (s, 3H), 2.241 (s, 3H);

$^{13}\text{C NMR}$  (100 MHz,  $\text{CDCl}_3$ )  $\delta$  187.91, 149.25, 140.99, 139.11, 138.64, 138.17, 135.84, 132.29, 130.44, 130.37, 130.26, 129.64, 129.24, 129.15, 128.70, 128.58, 128.25, 127.83, 126.19, 124.24, 51.16, 21.49, 21.47.

**HRMS** (ESI)  $m/z$  calcd. for  $\text{C}_{25}\text{H}_{22}\text{N}_2\text{ONa}$  ( $\text{M}+\text{Na}$ ) $^+$ : 389.1624, found 389.1616.

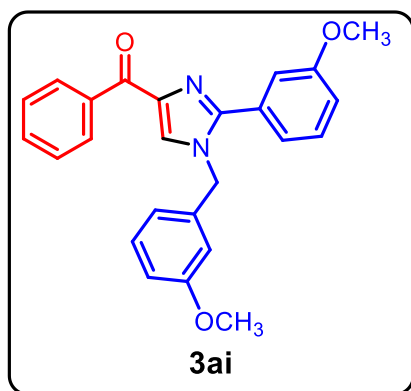

**(1-(3-methoxybenzyl)-2-(3-methoxyphenyl)-1*H*-imidazol-4-yl)(phenyl)methanone (3ai)**

According to the general procedure, **3ai** was obtained using (*E*)-3-(dimethylamino)-1-phenyl prop-2-en-1-one **1a** (35.0 mg, 0.2 mmol) and (3-methoxyphenyl)methanamine **2i** (54.8 mg, 51.1  $\mu$ L, 0.4 mmol) in 62% yield (49.4 mg) as a yellow solid (silica gel flash chromatography: petroleum ether/EtOAc = 6:1).

**<sup>1</sup>H NMR** (400 MHz, CDCl<sub>3</sub>)  $\delta$  8.269 - 8.245 (m, 2H), 7.711 (s, 1H), 7.509 (t, *J* = 7.2 Hz, 1H), 7.431 (t, *J* = 8.0 Hz, 2H), 7.311 (t, *J* = 8.0 Hz, 1H), 7.240 - 7.220 (m, 1H), 7.153 - 7.124 (m, 2H), 6.971 - 6.944 (m, 1H), 6.833 - 6.806 (m, 1H), 6.664 (d, *J* = 7.6 Hz, 1H), 6.595 (s, 1H), 5.195 (s, 2H), 3.734 (s, 3H), 3.724 (s, 3H);

**<sup>13</sup>C NMR** (100 MHz, CDCl<sub>3</sub>)  $\delta$  187.85, 160.33, 159.85, 148.92, 141.02, 138.11, 137.46, 132.35, 130.89, 130.44, 130.34, 129.86, 128.87, 128.27, 121.50, 119.15, 115.85, 114.66, 113.67, 112.86, 55.45, 55.39, 51.06.

**HRMS** (ESI) *m/z* calcd. for C<sub>25</sub>H<sub>23</sub>N<sub>2</sub>O<sub>3</sub> (M+H)<sup>+</sup>: 399.1703, found 399.1712.

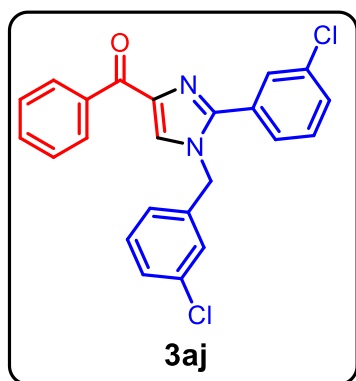

**(1-(3-chlorobenzyl)-2-(3-chlorophenyl)-1*H*-imidazol-4-yl)(phenyl)methanone (3aj)**

According to the general procedure, **3aj** was obtained using (*E*)-3-(dimethylamino)-1-phenyl prop-2-en-1-one **1a** (35.0 mg, 0.2 mmol) and (3-chlorophenyl)methanamine **2j** (56.4 mg, 4

8.4  $\mu\text{L}$ , 0.4 mmol) in 48% yield (39.1 mg) as a yellow solid (silica gel flash chromatography: petroleum ether/EtOAc = 6:1).

$^1\text{H NMR}$  (400 MHz,  $\text{CDCl}_3$ )  $\delta$  8.302 (d,  $J = 7.6$  Hz, 2H), 7.76 (s, 1H), 7.620 (s, 1H), 7.561 (t,  $J = 7.2$  Hz, 1H), 7.492 (d,  $J = 7.6$  Hz, 2H), 7.463 - 7.432 (m, 2H), 7.384 (d,  $J = 6.8$  Hz, 1H), 7.310 (d,  $J = 6.8$  Hz, 2H), 7.097 (s, 1H), 6.972 (d,  $J = 6.8$  Hz, 1H), 5.230 (s, 2H);

$^{13}\text{C NMR}$  (100 MHz,  $\text{CDCl}_3$ )  $\delta$  187.68, 147.46, 141.50, 137.81, 137.47, 135.45, 135.00, 132.60, 131.22, 130.74, 130.40, 130.17, 130.00, 129.52, 128.99, 128.78, 128.36, 127.23, 127.19, 125.11, 50.69.

**HRMS** (ESI)  $m/z$  calcd. for  $\text{C}_{23}\text{H}_{17}\text{Cl}_2\text{N}_2\text{O}$  ( $\text{M}+\text{H}$ ) $^+$ : 407.0712, found 407.0708.

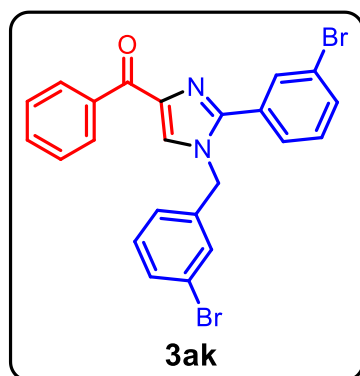

**(1-(3-bromobenzyl)-2-(3-bromophenyl)-1H-imidazol-4-yl)(phenyl)methanone (3ak)**

According to the general procedure, **3ak** was obtained using (*E*)-3-(dimethylamino)-1-phenylprop-2-en-1-one **1a** (35.0 mg, 0.2 mmol) and (3-bromophenyl)methanamine **2k** (74.0 mg, 50.0  $\mu\text{L}$ , 0.4 mmol) in 62% yield (61.5 mg) as yellow oily liquid (silica gel flash chromatography: petroleum ether/EtOAc = 6:1).

$^1\text{H NMR}$  (400 MHz,  $\text{CDCl}_3$ )  $\delta$  8.305 - 8.282 (m, 2H), 7.760 (s, 2H), 7.605 - 7.580 (m, 1H), 7.552 (d,  $J = 6.8$  Hz, 1H), 7.500 - 7.464 (m, 4H), 7.311 (t,  $J = 7.6$  Hz, 1H), 7.254 - 7.220 (m, 2H), 7.014 (d,  $J = 8.8$  Hz, 1H), 5.214 (s, 2H);

$^{13}\text{C NMR}$  (100 MHz,  $\text{CDCl}_3$ )  $\delta$  187.68, 147.32, 141.51, 137.81, 137.69, 132.90, 132.59, 132.38, 131.93, 131.46, 130.99, 130.39, 130.36, 130.17, 128.79, 128.36, 127.63, 125.60, 123.50, 123.00, 50.62.

**HRMS** (ESI)  $m/z$  calcd. for  $\text{C}_{23}\text{H}_{17}\text{Br}_2\text{N}_2\text{O}$  ( $\text{M}+\text{H}$ ) $^+$ : 494.9702, found 494.9700.

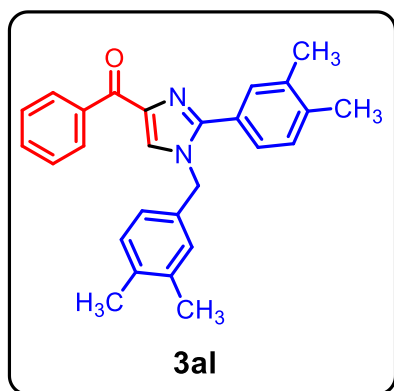

**(1-(3,4-dimethylbenzyl)-2-(3,4-dimethylphenyl)-1*H*-imidazol-4-yl)(phenyl)methanone (3al)**

According to the general procedure, **3al** was obtained using (*E*)-3-(dimethylamino)-1-phenylprop-2-en-1-one **1a** (35.0 mg, 0.2 mmol) and (3,4-dimethylphenyl)methanamine **2l** (54.0 mg, 56.9  $\mu$ L, 0.4 mmol) in 72% yield (56.7 mg) as a yellow solid (silica gel flash chromatography: petroleum ether/EtOAc = 6:1).

**<sup>1</sup>H NMR** (400 MHz, CDCl<sub>3</sub>)  $\delta$  8.285 (d, *J* = 7.2 Hz, 2H), 7.691 (s, 1H), 7.529 (t, *J* = 6.0 Hz, 1H), 7.456 (t, *J* = 6.8 Hz, 3H), 7.326 (d, *J* = 7.6 Hz, 1H), 7.193 (d, *J* = 8.0 Hz, 1H), 7.112 (d, *J* = 7.6 Hz, 1H), 6.872 (t, *J* = 8.4 Hz, 2H), 5.161 (s, 2H), 2.302 (d, *J* = 6.4 Hz, 6H), 2.242 (d, *J* = 8.0 Hz, 6H);

**<sup>13</sup>C NMR** (100 MHz, CDCl<sub>3</sub>)  $\delta$  187.96, 149.35, 140.79, 138.37, 138.25, 137.58, 137.17, 136.92, 133.31, 132.20, 130.69, 130.39, 130.33, 129.86, 128.62, 128.48, 128.20, 127.25, 126.50, 124.69, 50.93, 19.87, 19.81, 19.77, 19.53.

**HRMS** (ESI) *m/z* calcd. for C<sub>27</sub>H<sub>27</sub>N<sub>2</sub>O (M+H)<sup>+</sup>: 395.2118, found 395.2126.

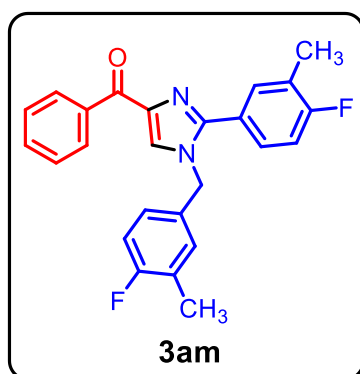

**(1-(4-fluoro-3-methylbenzyl)-2-(4-fluoro-3-methylphenyl)-1*H*-imidazol-4-yl)(phenyl)methanone (3am)**

According to the general procedure, **3am** was obtained using (*E*)-3-(dimethylamino)-1-phenylprop-2-en-1-one **1a** (35.0 mg, 0.2 mmol) and (4-fluoro-3-methylphenyl)methanamine **2m**

(55.6 mg, 52.5  $\mu$ L, 0.4 mmol) in 81% yield (65.1 mg) as a yellow solid (silica gel flash chromatography: petroleum ether/EtOAc = 6:1).

**$^1\text{H NMR}$**  (400 MHz,  $\text{CDCl}_3$ )  $\delta$  8.273 - 8.249 (m, 2H), 7.700 (s, 1H), 7.562 - 7.518 (m, 1H), 7.484 - 7.439 (m, 3H), 7.355 - 7.316 (m, 1H), 7.056 (t,  $J$  = 9.2 Hz, 1H), 6.975 (t,  $J$  = 8.4 Hz, 1H), 6.917 - 6.853 (m, 2H), 5.142 (s, 2H), 2.292 (d,  $J$  = 2.0 Hz, 3H), 2.236 (d,  $J$  = 2.0 Hz, 3H);

**$^{13}\text{C NMR}$**  (100 MHz,  $\text{CDCl}_3$ )  $\delta$  187.84, 163.46, 162.48, 160.99, 160.03, 148.28, 140.96, 138.02, 132.93 (d,  $J$  = 6.1 Hz), 132.42, 131.16 (d,  $J$  = 4.0 Hz), 130.29 (t,  $J$  = 3.0 Hz), 128.52, 128.30, 128.28 (d,  $J$  = 9.1 Hz), 126.15 (d,  $J$  = 8.1 Hz), 125.95 (d,  $J$  = 12.1 Hz), 125.71, 125.47 (d,  $J$  = 4.0 Hz), 115.86 (d,  $J$  = 23.2 Hz), 115.44 (d,  $J$  = 23.2 Hz), 50.56, 14.64 (dd,  $J$  = 5.0, 4.0 Hz);

**$^{19}\text{F NMR}$**  (376 MHz,  $\text{CDCl}_3$ )  $\delta$  -115.00, -117.36.

**HRMS** (ESI)  $m/z$  calcd. for  $\text{C}_{25}\text{H}_{21}\text{F}_2\text{N}_2\text{O}$  ( $\text{M}+\text{H}$ ) $^+$ : 403.1616, found 403.1620.

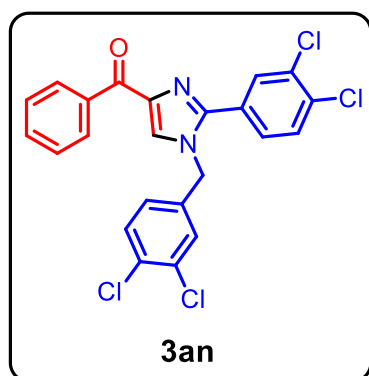

**(1-(3,4-dichlorobenzyl)-2-(3,4-dichlorophenyl)-1H-imidazol-4-yl)(phenyl)methanone (3an)**

According to the general procedure, **3an** was obtained using (*E*)-3-(dimethylamino)-1-phenylprop-2-en-1-one **1a** (35.0 mg, 0.2 mmol) and (3,4-dichlorophenyl)methanamine **2n** (70.8 mg, 53.6  $\mu$ L, 0.4 mmol) in 53% yield (50.5 mg) as a yellow solid (silica gel flash chromatography: petroleum ether/EtOAc = 6:1).

**$^1\text{H NMR}$**  (400 MHz,  $\text{CDCl}_3$ )  $\delta$  8.286 (d,  $J$  = 7.6 Hz, 2H), 7.757 (s, 1H), 7.711 (s, 1H), 7.571 (t,  $J$  = 7.2 Hz, 1H), 7.528 - 7.440 (m, 4H), 7.384 - 7.359 (m, 1H), 7.195 (s, 1H), 6.929 - 6.903 (m, 1H), 5.208 (s, 2H);

**$^{13}\text{C NMR}$**  (100 MHz,  $\text{CDCl}_3$ )  $\delta$  187.53, 146.47, 141.74, 137.66, 135.41, 134.51, 133.90, 133.48, 133.29, 132.74, 131.54, 131.16, 130.98, 130.38, 129.26, 128.95, 128.82, 128.42, 128.05, 126.12, 50.21.

**HRMS** (ESI)  $m/z$  calcd. for  $\text{C}_{23}\text{H}_{14}\text{Cl}_4\text{N}_2\text{ONa}$  ( $\text{M}+\text{Na}$ ) $^+$ : 496.9752, found 496.9760.

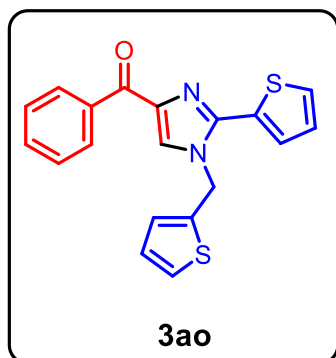

**Phenyl(2-(thiophen-2-yl)-1-(thiophen-2-ylmethyl)-1*H*-imidazol-4-yl)methanone (3ao)**

According to the general procedure, **3ao** was obtained using (*E*)-3-(dimethylamino)-1-phenylprop-2-en-1-one **1a** (35.0 mg, 0.2 mmol) and thiophen-2-ylmethanamine **2o** (45.2 mg, 41.0  $\mu$ L, 0.4 mmol) in 59% yield (41.3 mg) as a yellow solid (silica gel flash chromatography: petroleum ether/EtOAc = 6:1).

**<sup>1</sup>H NMR** (400 MHz, CDCl<sub>3</sub>)  $\delta$  8.296 (d, *J* = 7.2 Hz, 2H), 7.768 (s, 1H), 7.567 - 7.523 (m, 1H), 7.484 - 7.447 (m, 3H), 7.388 - 7.376 (m, 1H), 7.317 - 7.301 (m, 1H), 7.129 - 7.107 (m, 1H), 6.997 - 6.976 (m, 1H), 6.957 (s, 1H), 5.490 (s, 2H);

**<sup>13</sup>C NMR** (100 MHz, CDCl<sub>3</sub>)  $\delta$  187.49, 142.61, 141.18, 137.87, 137.36, 132.46, 131.08, 130.41, 128.42, 128.26, 128.16, 128.06, 127.76, 127.51, 127.24, 126.73, 46.32.

**HRMS** (ESI) *m/z* calcd. for C<sub>19</sub>H<sub>15</sub>N<sub>2</sub>OS<sub>2</sub>(M+H)<sup>+</sup>: 351.0620, found 351.0624.

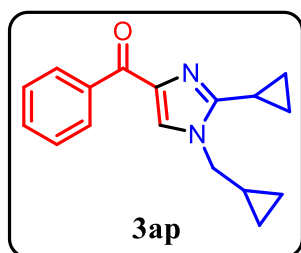

**(2-cyclopropyl-1-(cyclopropylmethyl)-1*H*-imidazol-4-yl)(phenyl)methanone (3ap)**

According to the general procedure, **3ap** was obtained using (*E*)-3-(dimethylamino)-1-phenylprop-2-en-1-one **1a** (35.0 mg, 0.2 mmol) and cyclopropylmethanamine **2p** (28.4 mg, 34.2  $\mu$ L, 0.4 mmol) in 28% yield (14.9 mg) as a yellow solid (silica gel flash chromatography: petroleum ether/EtOAc = 4:1).

**<sup>1</sup>H NMR** (400 MHz, CDCl<sub>3</sub>)  $\delta$  8.162 - 8.138 (m, 2H), 7.673 (s, 1H), 7.550 - 7.513 (m, 1H), 7.469 - 7.429 (m, 2H), 3.900 (d, *J* = 7.2 Hz, 2H), 1.853 - 1.787 (m, 1H), 1.257 - 1.233 (m, 1H), 1.175 - 1.136 (m, 2H), 1.025 - 0.978 (m, 2H), 0.728 - 0.680 (m, 2H), 0.414 - 0.375 (m, 2H);

$^{13}\text{C NMR}$  (100 MHz,  $\text{CDCl}_3$ )  $\delta$  187.89, 150.71, 139.20, 138.62, 132.04, 130.11, 128.19, 127.64, 50.85, 11.35, 7.42, 4.34, 1.16.

**HRMS** (ESI)  $m/z$  calcd. for  $\text{C}_{18}\text{H}_{18}\text{N}_2\text{O}(\text{M}+\text{H})^+$ : 267.1492, found 267.1493.

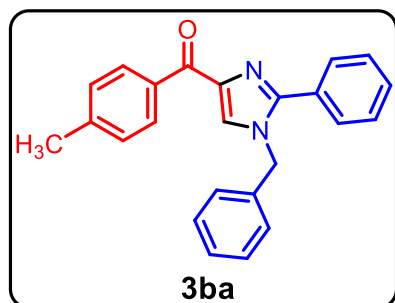

**(1-benzyl-2-phenyl-1H-imidazol-4-yl)(p-tolyl)methanone (3ba)**

According to the general procedure, **3ba** was obtained using (*E*)-3-(dimethylamino)-1-(p-tolyl)prop-2-en-1-one **1b** (37.8 mg, 0.2 mmol) and phenylmethanamine **2a** (42.8 mg, 43.6  $\mu\text{L}$ , 0.4 mmol) in 66% yield (46.5 mg) as a yellow solid (silica gel flash chromatography: petroleum ether/EtOAc = 6:1).

$^1\text{H NMR}$  (400 MHz,  $\text{CDCl}_3$ )  $\delta$  8.151 (d,  $J$  = 8.4 Hz, 2H), 7.649 (s, 1H), 7.552 - 7.528 (m, 2H), 7.371 - 7.354 (m, 3H), 7.302 - 7.244 (m, 3H), 7.190 (d,  $J$  = 6.8 Hz, 2H), 7.041 - 7.017 (m, 2H), 5.173 (s, 2H), 2.328 (s, 3H);

$^{13}\text{C NMR}$  (100 MHz,  $\text{CDCl}_3$ )  $\delta$  187.58, 148.93, 143.01, 141.32, 135.90, 135.48, 130.52, 129.80, 129.65, 129.32, 129.30, 128.98, 128.80, 128.52, 128.49, 127.03, 51.10, 21.78.

**HRMS** (ESI)  $m/z$  calcd. for  $\text{C}_{24}\text{H}_{21}\text{N}_2\text{O}(\text{M}+\text{H})^+$ : 353.1648, found 353.1644.

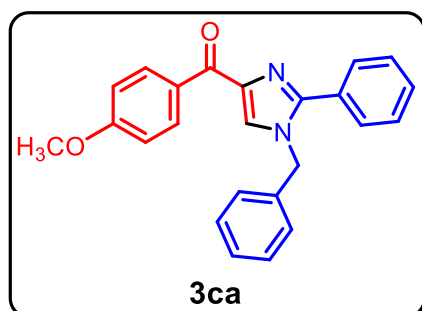

**(1-benzyl-2-phenyl-1H-imidazol-4-yl)(4-methoxyphenyl)methanone (3ca)**

According to the general procedure, **3ca** was obtained using (*E*)-3-(dimethylamino)-1-(4-methoxyphenyl)prop-2-en-1-one **1c** (41.0 mg, 0.2 mmol) and phenylmethanamine **2a** (42.8 mg, 43.6  $\mu\text{L}$ , 0.4 mmol) in 63% yield (46.4 mg) as a yellow solid (silica gel flash chromatography: petroleum ether/EtOAc = 6:1).

**<sup>1</sup>H NMR** (400 MHz, CDCl<sub>3</sub>) δ 8.457 - 8.427 (m, 2H), 7.757 (s, 1H), 7.632 - 7.608 (m, 2H), 7.462 - 7.428 (m, 3H), 7.381 - 7.321 (m, 3H), 7.125 - 7.102 (m, 2H), 6.980 - 6.943 (m, 2H), 5.251 (s, 2H), 3.863 (s, 3H);

**<sup>13</sup>C NMR** (100 MHz, CDCl<sub>3</sub>) δ 186.27, 163.14, 148.63, 141.64, 135.93, 132.90, 130.82, 129.89, 129.61, 129.30, 129.28, 128.80, 128.46, 128.26, 127.05, 113.52, 55.51, 51.08.

**HRMS** (ESI) *m/z* calcd. for C<sub>24</sub>H<sub>21</sub>N<sub>2</sub>O<sub>2</sub> (M+H)<sup>+</sup>: 369.1598, found 369.1596.

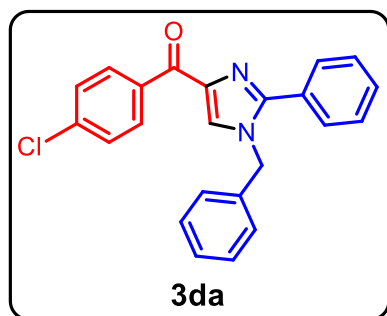

**(1-benzyl-2-phenyl-1H-imidazol-4-yl)(4-chlorophenyl)methanone (3da)**

According to the general procedure, **3da** was obtained using (*E*)-1-(4-chlorophenyl)-3-(dimethylamino)prop-2-en-1-one **1d** (41.8 mg, 0.2 mmol) and phenylmethanamine **2a** (42.8 mg, 43.6 μL, 0.4 mmol) in 66% yield (49.2 mg) as a yellow solid (silica gel flash chromatography: petroleum ether/EtOAc = 6:1).

**<sup>1</sup>H NMR** (400 MHz, CDCl<sub>3</sub>) δ 8.386 - 8.345 (m, 2H), 7.788 (s, 1H), 7.622 - 7.598 (m, 2H), 7.475 - 7.445 (m, 4H), 7.437 - 7.421 (m, 1H), 7.381 - 7.330 (m, 3H), 7.124 - 7.100 (m, 2H), 5.254 (s, 2H);

**<sup>13</sup>C NMR** (100 MHz, CDCl<sub>3</sub>) δ 186.38, 148.93, 141.13, 138.78, 136.22, 135.72, 132.06, 129.78, 129.68, 129.34, 129.29, 128.87, 128.71, 128.58, 128.52, 127.10, 51.19.

**HRMS** (ESI) *m/z* calcd. for C<sub>23</sub>H<sub>18</sub>ClN<sub>2</sub>O (M+H)<sup>+</sup>: 373.1102, found 373.1111.

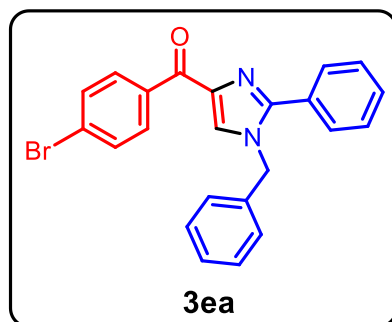

**(1-benzyl-2-phenyl-1H-imidazol-4-yl)(4-bromophenyl)methanone (3ea)**

According to the general procedure, **3ea** was obtained using (*E*)-1-(4-bromophenyl)-3-(dime



thylamino)prop-2-en-1-one **1e** (50.6 mg, 0.2 mmol) and phenylmethanamine **2a** (42.8 mg, 43.6  $\mu$ L, 0.4 mmol) in 73% yield (60.9 mg) as a yellow solid (silica gel flash chromatography: petroleum ether/EtOAc = 6:1).

**<sup>1</sup>H NMR** (400 MHz, CDCl<sub>3</sub>)  $\delta$  8.274 (d,  $J$  = 8.4 Hz, 2H), 7.784 (s, 1H), 7.604 (d,  $J$  = 8.0 Hz, 4H), 7.463 - 7.446 (m, 3H), 7.388 - 7.313 (m, 3H), 7.112 (d,  $J$  = 8.4 Hz, 2H), 5.252 (s, 2H);

**<sup>13</sup>C NMR** (100 MHz, CDCl<sub>3</sub>)  $\delta$  186.57, 148.97, 141.09, 136.66, 135.72, 132.19, 131.52, 129.80, 129.68, 129.35, 129.30, 128.89, 128.74, 128.60, 127.54, 127.12, 51.21.

**HRMS** (ESI)  $m/z$  calcd. for C<sub>23</sub>H<sub>17</sub>BrN<sub>2</sub>ONa (M+Na)<sup>+</sup>: 439.0416, found 439.0419.

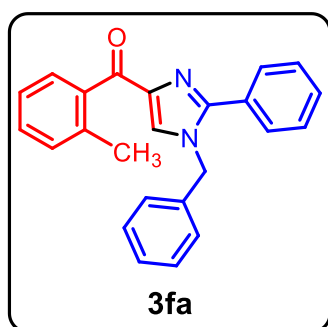

#### (1-benzyl-2-phenyl-1H-imidazol-4-yl)(o-tolyl)methanone (**3fa**)

According to the general procedure, **3fa** was obtained using (*E*)-3-(dimethylamino)-1-(*o*-tolyl)prop-2-en-1-one **1f** (37.8 mg, 0.2 mmol) and phenylmethanamine **2a** (42.8 mg, 43.6  $\mu$ L, 0.4 mmol) in 77% yield (54.2 mg) as yellow oily liquid (silica gel flash chromatography: petroleum ether/EtOAc = 6:1).

**<sup>1</sup>H NMR** (400 MHz, CDCl<sub>3</sub>)  $\delta$  7.675 - 7.638 (m, 3H), 7.544 (s, 1H), 7.491 - 7.464 (m, 3H), 7.391 (t,  $J$  = 7.6 Hz, 4H), 7.320 - 7.278 (m, 2H), 7.140 - 7.117 (m, 2H), 5.281 (s, 2H), 2.500 (s, 3H);

**<sup>13</sup>C NMR** (100 MHz, CDCl<sub>3</sub>)  $\delta$  190.98, 149.85, 141.34, 138.84, 137.27, 135.80, 131.13, 130.31, 129.76, 129.44, 129.31, 129.28, 129.19, 129.04, 128.73, 128.48, 126.87, 125.13, 51.08, 20.16.

**HRMS** (ESI)  $m/z$  calcd. for C<sub>24</sub>H<sub>21</sub>N<sub>2</sub>O (M+H)<sup>+</sup>: 353.1648, found 353.1653.

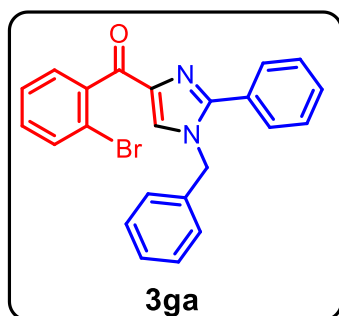

**(1-benzyl-2-phenyl-1*H*-imidazol-4-yl)(2-bromophenyl)methanone (3ga)**

According to the general procedure, **3ga** was obtained using (*E*)-1-(2-bromophenyl)-3-(dimethylamino)prop-2-en-1-one **1g** (50.6 mg, 0.2 mmol) and phenylmethanamine **2a** (42.8 mg, 43.6  $\mu$ L, 0.4 mmol) in 66% yield (57.5 mg) as a yellow solid (silica gel flash chromatography: petroleum ether/EtOAc = 6:1).

**<sup>1</sup>H NMR** (400 MHz, CDCl<sub>3</sub>)  $\delta$  8.303 (d, *J* = 7.2 Hz, 2H), 7.750 (s, 1H), 7.636 - 7.612 (m, 2H), 7.487 (s, 1H), 7.468 - 7.441 (m, 4H), 7.348 (t, *J* = 7.6 Hz, 3H), 7.126 - 7.103 (m, 2H), 5.265 (s, 2H);

**<sup>13</sup>C NMR** (100 MHz, CDCl<sub>3</sub>)  $\delta$  187.89, 149.07, 141.20, 138.12, 135.87, 132.37, 130.41, 129.78, 129.72, 129.36, 129.34, 128.84, 128.73, 128.54, 128.28, 127.07, 51.17.

**HRMS** (ESI) *m/z* calcd. for C<sub>23</sub>H<sub>18</sub>BrN<sub>2</sub>O (M+H)<sup>+</sup>: 417.0597, found 417.0588.

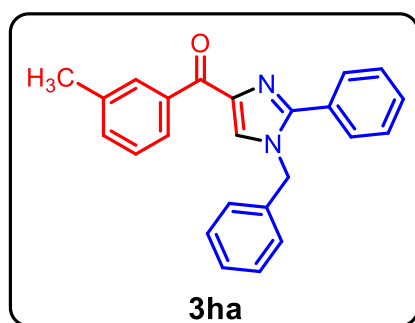

**(1-benzyl-2-phenyl-1*H*-imidazol-4-yl)(m-tolyl)methanone (3ha)**

According to the general procedure, **3ha** was obtained using (*E*)-3-(dimethylamino)-1-(m-tolyl)prop-2-en-1-one **1h** (37.8 mg, 0.2 mmol) and phenylmethanamine **2a** (42.8 mg, 43.6  $\mu$ L, 0.4 mmol) in 75% yield (52.8 mg) as yellow oily liquid (silica gel flash chromatography: petroleum ether/EtOAc = 6:1).

**<sup>1</sup>H NMR** (400 MHz, CDCl<sub>3</sub>)  $\delta$  8.105 - 8.078 (m, 1H), 8.016 (s, 1H), 7.708 (s, 1H), 7.634 - 7.609 (m, 2H), 7.455 - 7.437 (m, 3H), 7.364 - 7.346 (m, 5H), 7.114 - 7.100 (m, 2H), 5.261 (s, 2H), 2.416 (s, 3H);

**<sup>13</sup>C NMR** (100 MHz, CDCl<sub>3</sub>)  $\delta$  188.22, 149.15, 141.12, 138.22, 138.03, 135.90, 133.17, 130.62, 129.76, 129.72, 129.37, 129.34, 128.83, 128.71, 128.54, 128.15, 127.65, 127.07, 51.16, 21.58.

**HRMS** (ESI) *m/z* calcd. for C<sub>24</sub>H<sub>21</sub>N<sub>2</sub>O (M+H)<sup>+</sup>: 353.1648, found 353.1654.

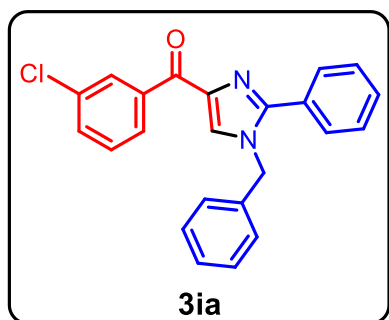

**(1-benzyl-2-phenyl-1H-imidazol-4-yl)(3-chlorophenyl)methanone (3ia)**

According to the general procedure, **3ia** was obtained using (*E*)-1-(3-chlorophenyl)-3-(dimethylamino)prop-2-en-1-one **1i** (41.8 mg, 0.2 mmol) and phenylmethanamine **2a** (42.8 mg, 4.36 μL, 0.4 mmol) in 69% yield (51.5 mg) as yellow oily liquid (silica gel flash chromatography: petroleum ether/EtOAc = 6:1).

<sup>1</sup>H NMR (400 MHz, CDCl<sub>3</sub>) δ 8.311 (s, 1H), 8.267 (d, *J* = 8.0 Hz, 1H), 7.777 (s, 1H), 7.631 - 7.607 (m, 2H), 7.526 - 7.498 (m, 1H), 7.478 - 7.452 (m, 3H), 7.427 - 7.407 (m, 1H), 7.388 - 7.354 (m, 3H), 7.127 - 7.104 (m, 2H), 5.264 (s, 2H);

<sup>13</sup>C NMR (100 MHz, CDCl<sub>3</sub>) δ 186.33, 149.15, 140.85, 139.53, 135.70, 134.40, 132.35, 130.46, 129.84, 129.61, 129.39, 129.33, 128.99, 128.91, 128.73, 128.64, 127.13, 51.25.

HRMS (ESI) *m/z* calcd. for C<sub>23</sub>H<sub>18</sub>ClN<sub>2</sub>O (M+H)<sup>+</sup>: 373.1102, found 373.1111.

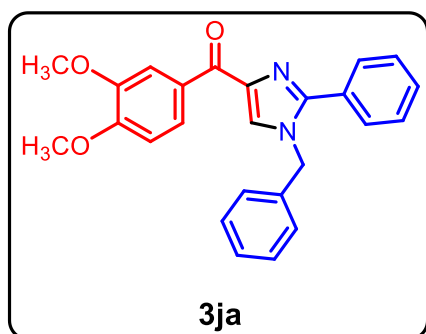

**(1-benzyl-2-phenyl-1H-imidazol-4-yl)(3,4-dimethoxyphenyl)methanone (3ja)**

According to the general procedure, **3ja** was obtained using (*E*)-1-(3,4-dimethoxyphenyl)-3-(dimethylamino)prop-2-en-1-one **1j** (47.0 mg, 0.2 mmol) and phenylmethanamine **2a** (42.8 mg, 43.6 μL, 0.4 mmol) in 78% yield (62.1 mg) as brown oil filled liquid (silica gel flash chromatography: petroleum ether/EtOAc = 6:1).

<sup>1</sup>H NMR (400 MHz, CDCl<sub>3</sub>) δ 8.271 - 8.240 (m, 1H), 7.947 (s, 1H), 7.754 (s, 1H), 7.628 - 7.603 (m, 2H), 7.461 - 7.425 (m, 3H), 7.360 - 7.321 (m, 3H), 7.130 - 7.110 (m, 2H), 6.931 (d, *J* =

8.4 Hz, 1H), 5.258 (s, 2H), 3.943 (d,  $J = 2.8$  Hz, 6H);

$^{13}\text{C}$  NMR (100 MHz,  $\text{CDCl}_3$ )  $\delta$  186.08, 152.92, 148.73, 148.67, 141.56, 135.91, 130.85, 129.86, 129.64, 129.31, 129.25, 128.83, 128.51, 128.38, 127.08, 125.66, 112.80, 110.14, 56.12, 56.08, 51.12.

HRMS (ESI)  $m/z$  calcd. for  $\text{C}_{25}\text{H}_{23}\text{N}_2\text{O}_3$  ( $\text{M}+\text{H}$ ) $^+$ : 399.1703, found 399.1704.

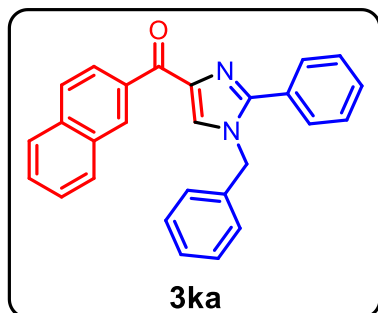

**(1-benzyl-2-phenyl-1H-imidazol-4-yl)(naphthalen-2-yl)methanone (3ka)**

According to the general procedure, **3ka** was obtained using (*E*)-3-(dimethylamino)-1-(naphthalen-2-yl)prop-2-en-1-one **1k** (45.0 mg, 0.2 mmol) and phenylmethanamine **2a** (42.8 mg, 43.6  $\mu\text{L}$ , 0.4 mmol) in 76% yield (59.0 mg) as brown oil filled liquid (silica gel flash chromatography: petroleum ether/EtOAc = 6:1).

$^1\text{H}$  NMR (400 MHz,  $\text{CDCl}_3$ )  $\delta$  8.978 (s, 1H), 8.293 - 8.268 (m, 1H), 7.987 (d,  $J = 8.0$  Hz, 1H), 7.920 - 7.861 (m, 2H), 7.794 (s, 1H), 7.665 - 7.641 (m, 2H), 7.597 - 7.501 (m, 3H), 7.472 - 7.456 (m, 2H), 7.370 - 7.331 (m, 3H), 7.152 - 7.118 (m, 2H), 5.286 (s, 2H).

$^{13}\text{C}$  NMR (100 MHz,  $\text{CDCl}_3$ )  $\delta$  187.68, 149.13, 141.13, 135.81, 135.45, 135.36, 132.66, 132.30, 129.91, 129.82, 129.61, 129.38, 129.35, 129.21, 128.79, 128.58, 128.17, 128.05, 127.82, 127.12, 126.49, 126.10, 51.24.

HRMS (ESI)  $m/z$  calcd. for  $\text{C}_{27}\text{H}_{20}\text{N}_2\text{ONa}$  ( $\text{M}+\text{Na}$ ) $^+$ : 411.1468, found 411.1467.

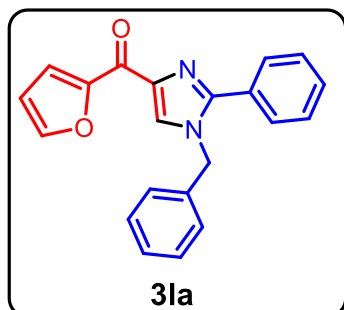

**(1-benzyl-2-phenyl-1H-imidazol-4-yl)(furan-2-yl)methanone (3la)**

According to the general procedure, **3la** was obtained using (*E*)-3-(dimethylamino)-1-(furan-2-yl)prop-2-en-1-one **1l** (33.0 mg, 0.2 mmol) and phenylmethanamine **2a** (42.8 mg, 43.6  $\mu\text{L}$ ).

L, 0.4 mmol) in 73% yield (47.9 mg) as yellow oily liquid (silica gel flash chromatography: petroleum ether/EtOAc = 6:1).

**<sup>1</sup>H NMR** (400 MHz, CDCl<sub>3</sub>) δ 8.094 (d, *J* = 3.6 Hz, 1H), 7.908 (s, 1H), 7.661 - 7.657 (m, 1H), 7.626 - 7.602 (m, 2H), 7.469 - 7.432 (m, 3H), 7.378 - 7.319 (m, 3H), 7.118 - 7.094 (m, 2H), 6.575 - 6.561 (m, 1H), 5.254 (s, 2H);

**<sup>13</sup>C NMR** (100 MHz, CDCl<sub>3</sub>) δ 174.41, 152.05, 148.95, 146.72, 140.02, 135.77, 129.75, 129.69, 129.32, 129.26, 128.85, 128.54, 128.11, 127.08, 121.70, 112.34, 51.21.

**HRMS** (ESI) *m/z* calcd. for C<sub>21</sub>H<sub>16</sub>N<sub>2</sub>O<sub>2</sub>Na (M+Na)<sup>+</sup>: 351.1104, found 351.1113.

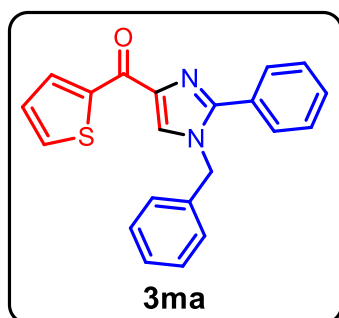

**(1-benzyl-2-phenyl-1*H*-imidazol-4-yl)(thiophen-2-yl)methanone (3ma)**

According to the general procedure, **3ma** was obtained using (*E*)-3-(dimethylamino)-1-(thiophen-2-yl)prop-2-en-1-one **1m** (36.2 mg, 0.2 mmol) and phenylmethanamine **2a** (42.8 mg, 43.6 μL, 0.4 mmol) in 77% yield (53.0 mg) as yellow oily liquid (silica gel flash chromatography: petroleum ether/EtOAc = 6:1).

**<sup>1</sup>H NMR** (400 MHz, CDCl<sub>3</sub>) δ 8.680 - 8.667 (m, 1H), 7.834 (s, 1H), 7.668 - 7.628 (m, 3H), 7.468 - 7.445 (m, 3H), 7.369 - 7.322 (m, 3H), 7.177 - 7.155 (m, 1H), 7.125 - 7.101 (m, 2H), 5.266 (s, 2H);

**<sup>13</sup>C NMR** (100 MHz, CDCl<sub>3</sub>) δ 179.21, 148.59, 143.05, 140.93, 135.77, 135.62, 134.16, 129.78, 129.68, 129.30, 129.20, 128.87, 128.51, 128.03, 127.78, 127.07, 51.21.

**HRMS** (ESI) *m/z* calcd. for C<sub>21</sub>H<sub>16</sub>N<sub>2</sub>OSK (M+K)<sup>+</sup>: 383.0615, found 383.0606.

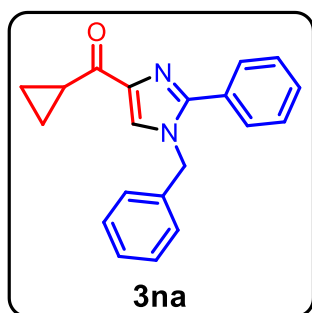

**(1-benzyl-2-phenyl-1*H*-imidazol-4-yl)(cyclopropyl)methanone (3na)**

According to the general procedure, **3na** was obtained using (*E*)-1-cyclopropyl-3-(dimethylamino)prop-2-en-1-one **1n** (27.8 mg, 0.2 mmol) and phenylmethanamine **2a** (42.8 mg, 43.6  $\mu$ L, 0.4 mmol) in 52% yield (31.4 mg) as brown oil filled liquid (silica gel flash chromatography: petroleum ether/EtOAc = 6:1).

**<sup>1</sup>H NMR** (400 MHz, CDCl<sub>3</sub>)  $\delta$  7.651 (s, 1H), 7.590 - 7.566 (m, 2H), 7.455 - 7.427 (m, 3H), 7.363 - 7.331 (m, 3H), 7.094 - 7.070 (m, 2H), 5.209 (s, 2H), 3.125 - 3.062 (m, 1H), 1.231 - 1.192 (m, 2H), 1.029 - 0.983 (m, 2H);

**<sup>13</sup>C NMR** (100 MHz, CDCl<sub>3</sub>)  $\delta$  196.61, 148.90, 141.92, 135.81, 129.77, 129.34, 129.31, 128.92, 128.54, 127.13, 124.83, 51.17, 17.23, 11.80.

**HRMS** (ESI)  $m/z$  calcd. for C<sub>20</sub>H<sub>18</sub>N<sub>2</sub>ONa (M+Na)<sup>+</sup>: 325.1311, found 325.1316.

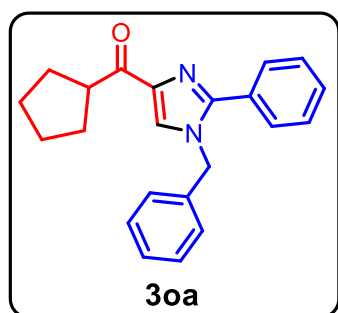

**(1-benzyl-2-phenyl-1H-imidazol-4-yl)(cyclopentyl)methanone (3oa)**

According to the general procedure, **3oa** was obtained using (*E*)-1-cyclopentyl-3-(dimethylamino)prop-2-en-1-one **1o** (33.4 mg, 0.2 mmol) and phenylmethanamine **2a** (42.8 mg, 43.6  $\mu$ L, 0.4 mmol) in 80% yield (52.8 mg) as yellow oily liquid (silica gel flash chromatography: petroleum ether/EtOAc = 6:1).

**<sup>1</sup>H NMR** (400 MHz, CDCl<sub>3</sub>)  $\delta$  7.637 (s, 1H), 7.569 - 7.544 (m, 2H), 7.451 - 7.415 (m, 3H), 7.366 - 7.315 (m, 3H), 7.093 - 7.070 (m, 2H), 5.186 (s, 2H), 3.944 - 3.863 (m, 1H), 1.990 - 1.927 (m, 2H), 1.904 - 1.848 (m, 2H), 1.756 - 1.714 (m, 2H), 1.659 - 1.599 (m, 2H);

**<sup>13</sup>C NMR** (100 MHz, CDCl<sub>3</sub>)  $\delta$  199.73, 148.72, 141.54, 135.90, 129.89, 129.65, 129.34, 129.28, 128.87, 128.49, 127.11, 125.52, 51.08, 46.85, 30.09, 26.46.

**HRMS** (ESI)  $m/z$  calcd. for C<sub>22</sub>H<sub>22</sub>N<sub>2</sub>ONa (M+Na)<sup>+</sup>: 353.1624, found 353.1624.

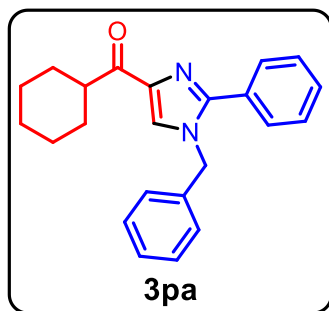

**(1-benzyl-2-phenyl-1H-imidazol-4-yl)(cyclohexyl)methanone (3pa)**

According to the general procedure, **3pa** was obtained using (*E*)-1-cyclohexyl-3-(dimethylamino)prop-2-en-1-one **1p** (36.2 mg, 0.2 mmol) and phenylmethanamine **2a** (42.8 mg, 0.4 mmol) in 83% yield (57.1 mg) as brown oil filled liquid (silica gel flash chromatography: petroleum ether/EtOAc = 6:1).

<sup>1</sup>H NMR (400 MHz, CDCl<sub>3</sub>) δ 7.637 (s, 1H), 7.570 - 7.546 (m, 2H), 7.462 - 7.416 (m, 3H), 7.364 - 7.316 (m, 3H), 7.090 - 7.066 (m, 2H), 5.185 (s, 2H), 3.522 - 3.448 (m, 1H), 1.967 - 1.929 (m, 2H), 1.821 - 1.773 (m, 2H), 1.725 - 1.674 (m, 1H), 1.537 - 1.348 (m, 5H);

<sup>13</sup>C NMR (100 MHz, CDCl<sub>3</sub>) δ 200.32, 148.68, 140.88, 135.86, 129.77, 129.70, 129.37, 129.29, 128.88, 128.49, 127.10, 125.72, 51.10, 45.75, 29.07, 26.17, 25.84.

HRMS (ESI) *m/z* calcd. for C<sub>23</sub>H<sub>25</sub>N<sub>2</sub>O (M+H)<sup>+</sup>: 345.1961, found 345.1968.

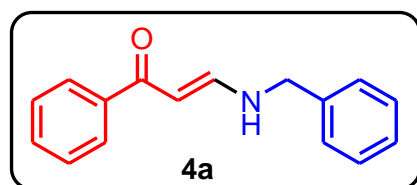

**(*E*)-3-(benzylamino)-1-phenylprop-2-en-1-one (4a)<sup>2</sup>**

<sup>1</sup>H NMR (400 MHz, CDCl<sub>3</sub>) δ 10.615 (brs, 1H), 7.897 - 7.876 (m, 2H), 7.432 - 7.407 (m, 3H), 7.364 - 7.342 (m, 2H), 7.317 - 7.285 (m, 2H), 7.042 - 6.986 (m, 1H), 5.789 - 5.766 (m, 1H), 4.469 - 4.449 (m, 2H).

[1]. Wang, F.; Sun, W.; Wang, Y.; Jiang, Y.; Loh, T.-P. J. O. I., Highly site-selective metal-free C-H acyloxylation of stable enamines. *Org. Lett.*, **2018**, *20* (4), 1256-1260.

[2]. Zhou, S.; Liu, D.-Y.; Wang, S.; Tian, J.-S.; Loh, T.-P., An efficient method for the synthesis of 2-pyridones via C-H bond functionalization. *Chem. Commun.* 2020, 56(95), 15020-15023.

**(F) Spectra**

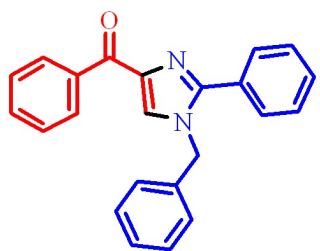

**3aa**

<sup>1</sup>H NMR (400 MHz, DMSO-d<sub>6</sub>)

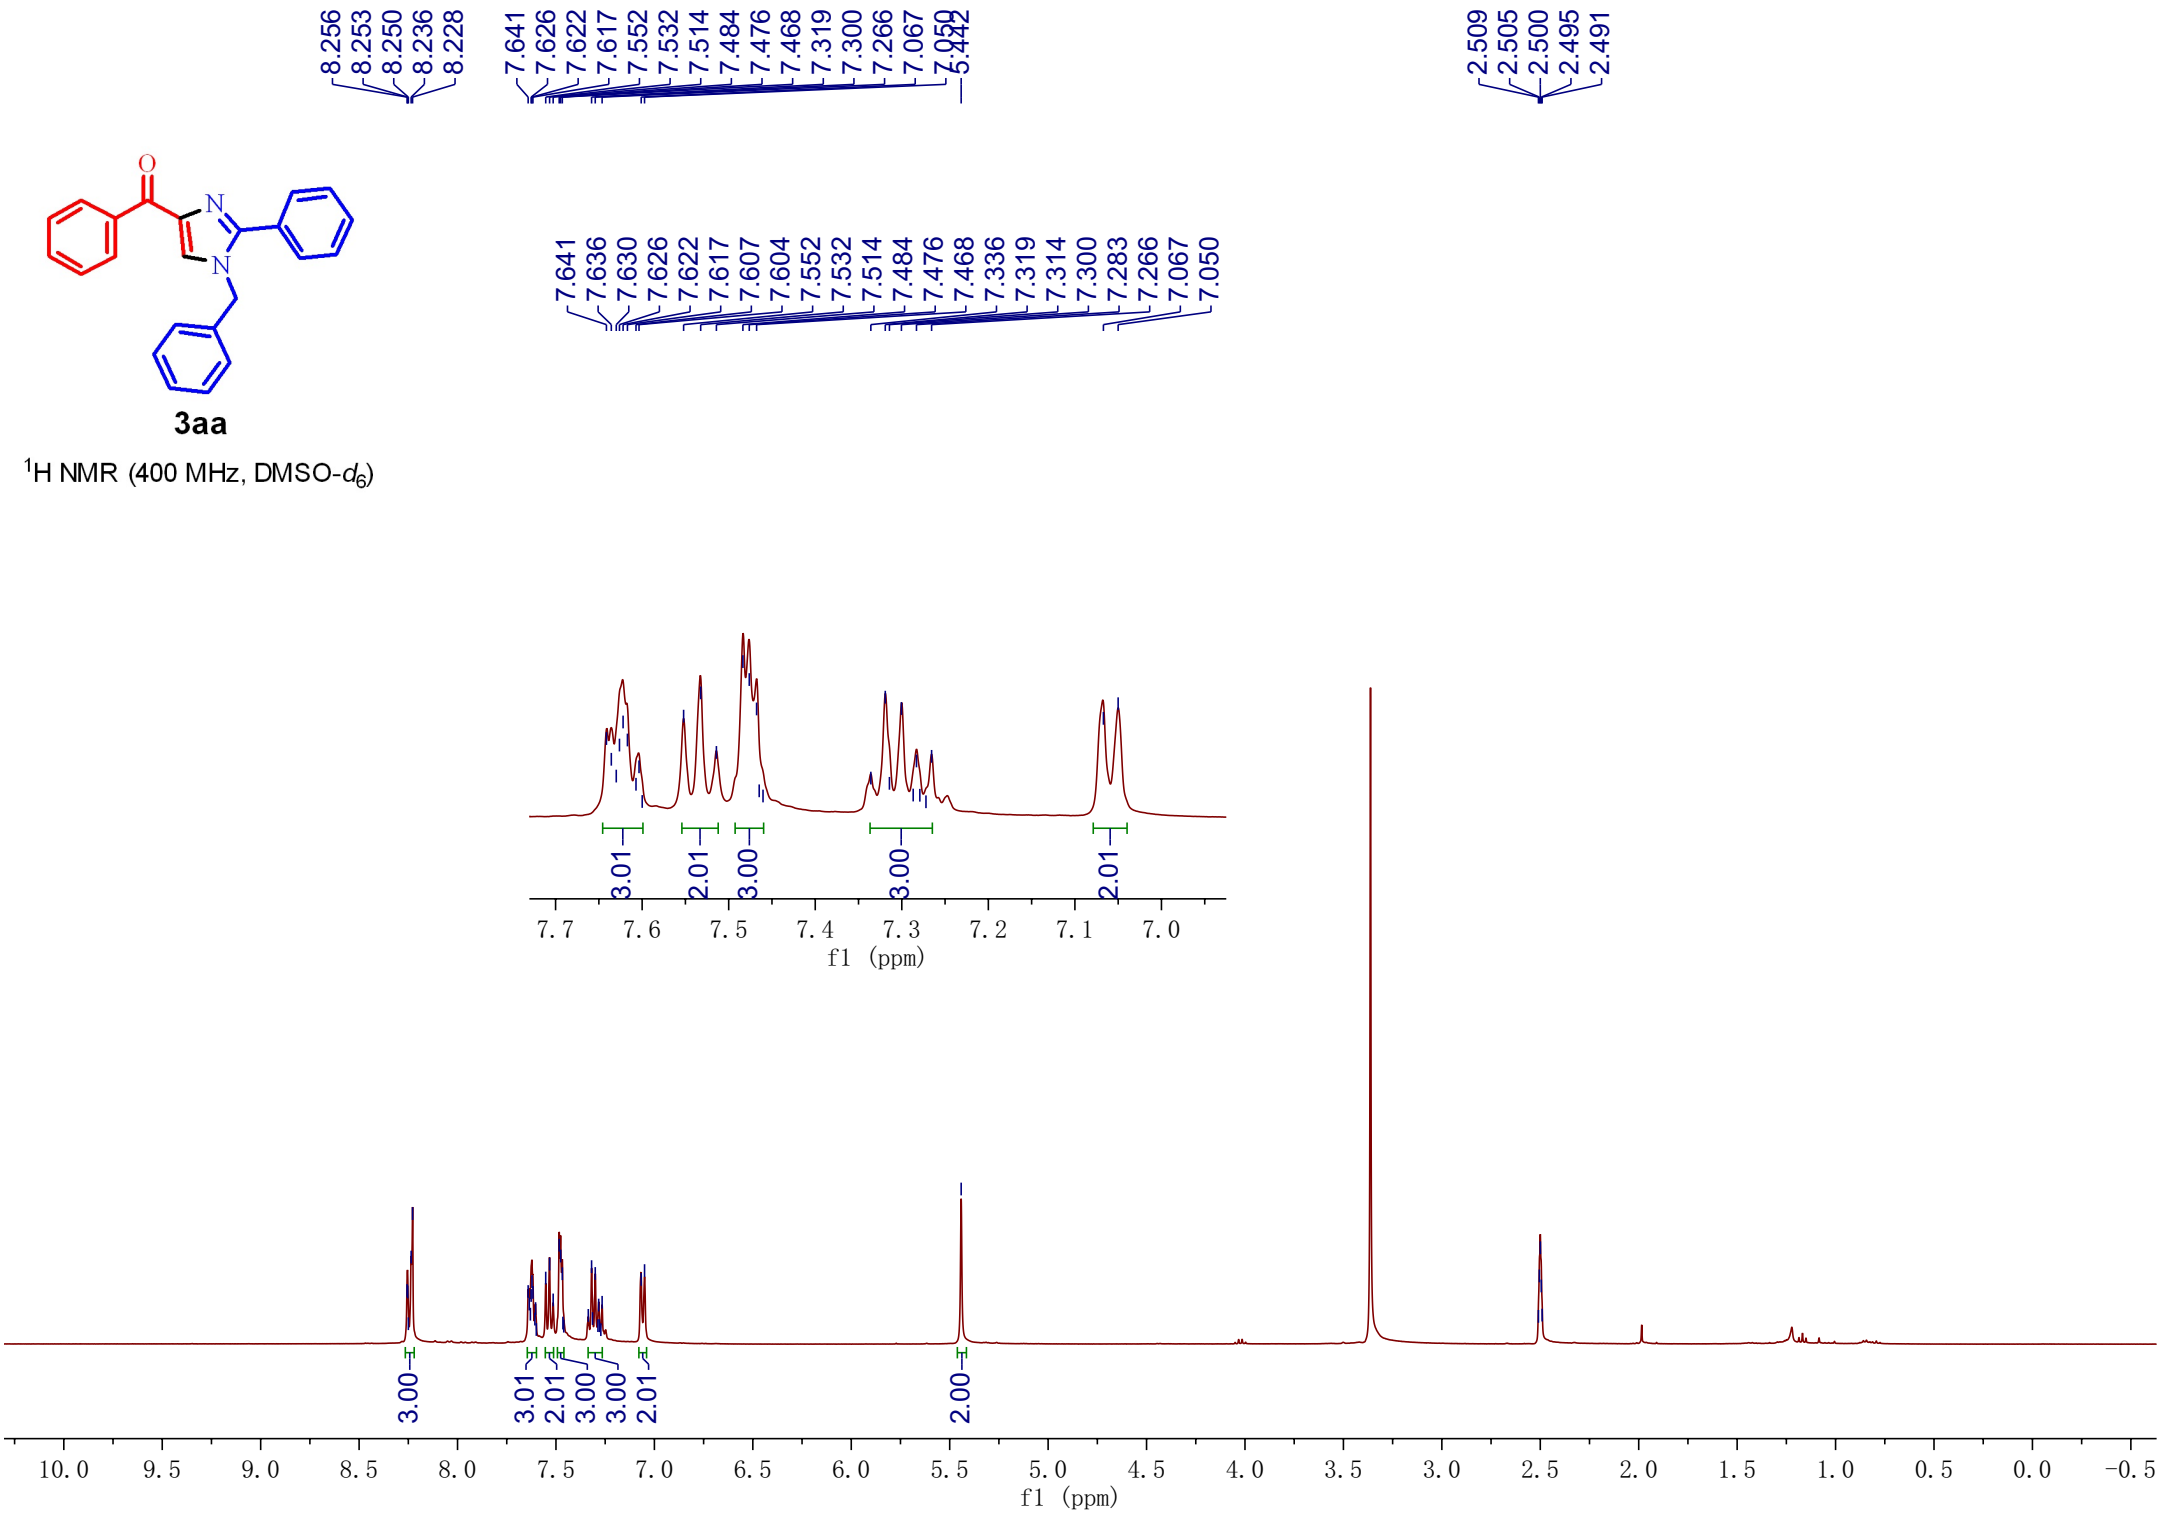



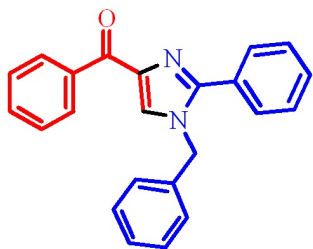

**3aa**

$^{13}\text{C}$  NMR (100 MHz, DMSO- $d_6$ )

— 186.47

— 147.82  
— 139.75  
— 137.79  
— 136.73  
— 132.29  
— 130.49  
— 129.86  
— 129.73  
— 129.40  
— 128.84  
— 128.74  
— 128.70  
— 128.24  
— 127.82  
— 126.82

— 50.25  
— 40.15  
— 39.94  
— 39.73  
— 39.52  
— 39.31  
— 39.10  
— 38.90

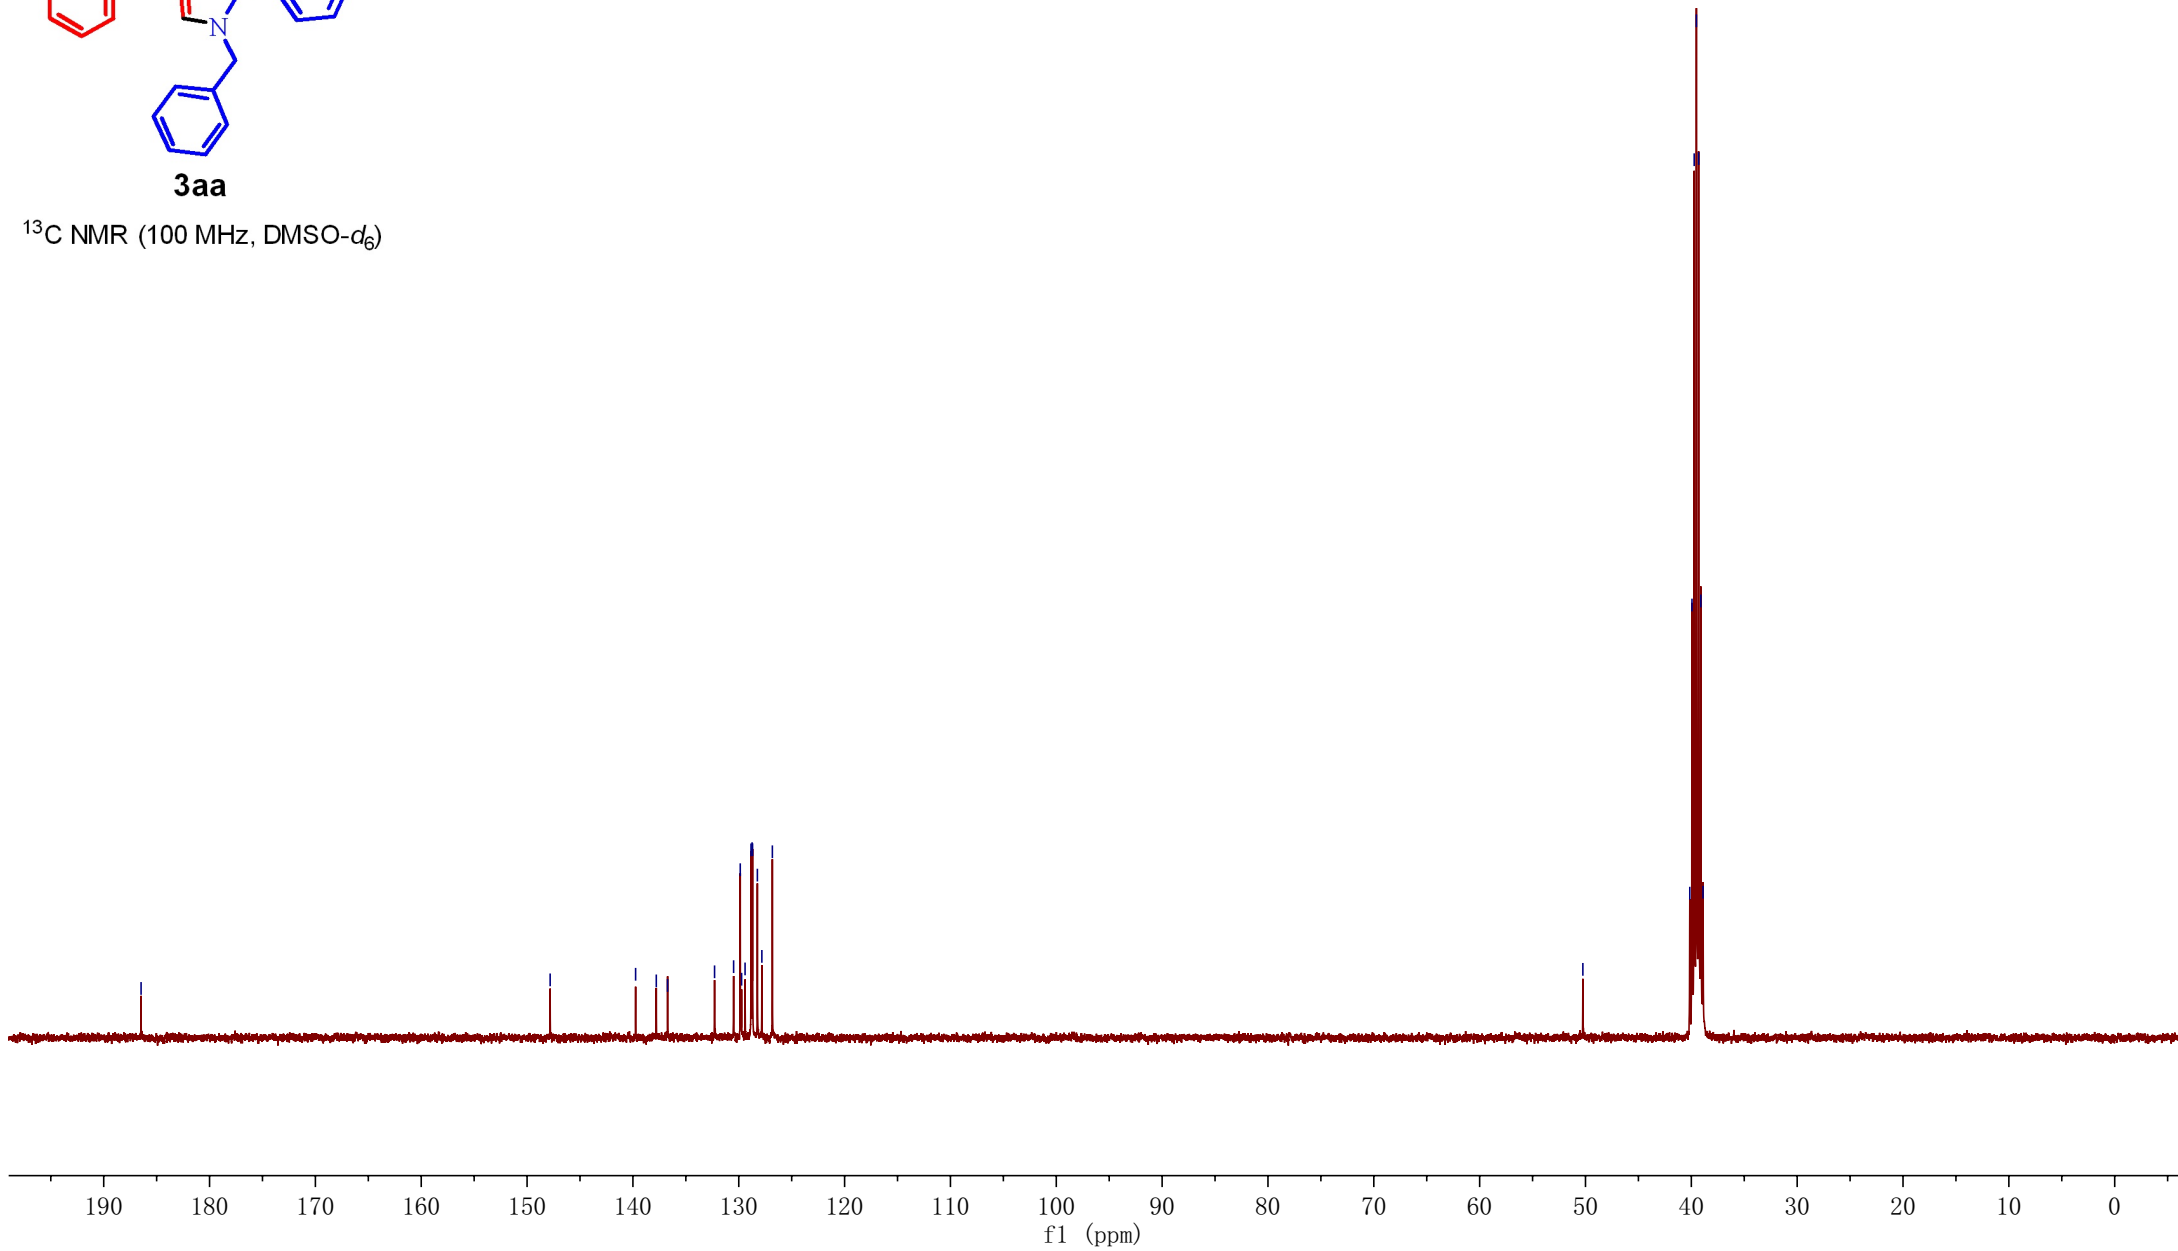

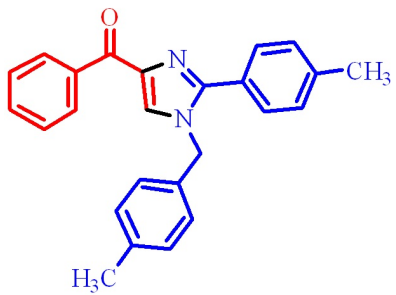

**3ab**

<sup>1</sup>H NMR (400 MHz, CDCl<sub>3</sub>)

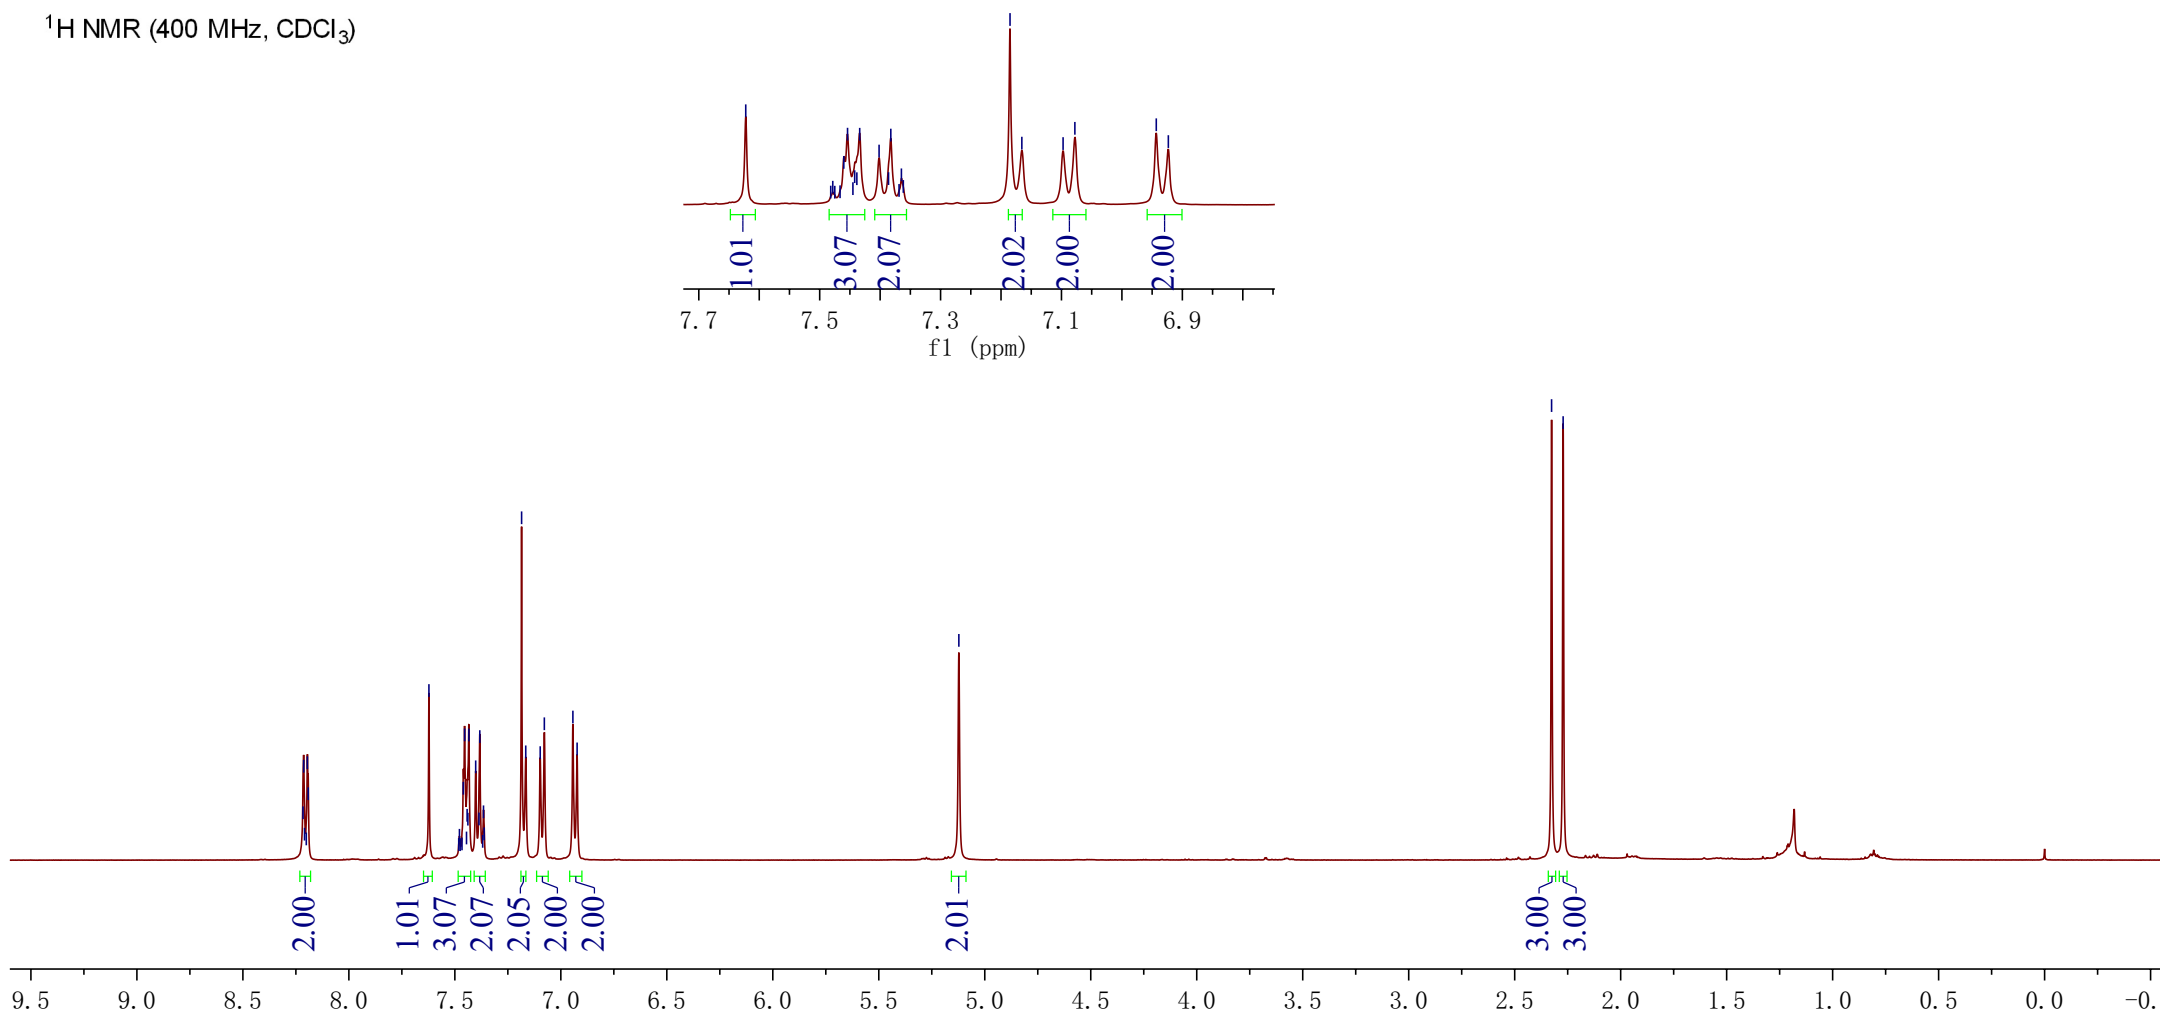

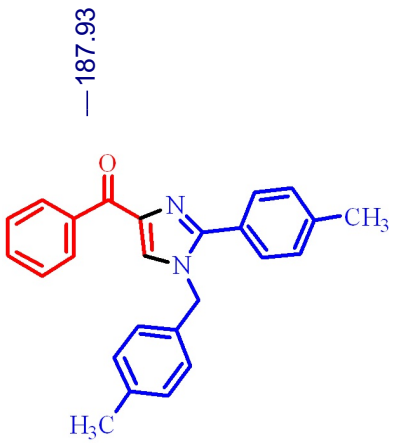

**3ab**

<sup>13</sup>C NMR (100 MHz, CDCl<sub>3</sub>)

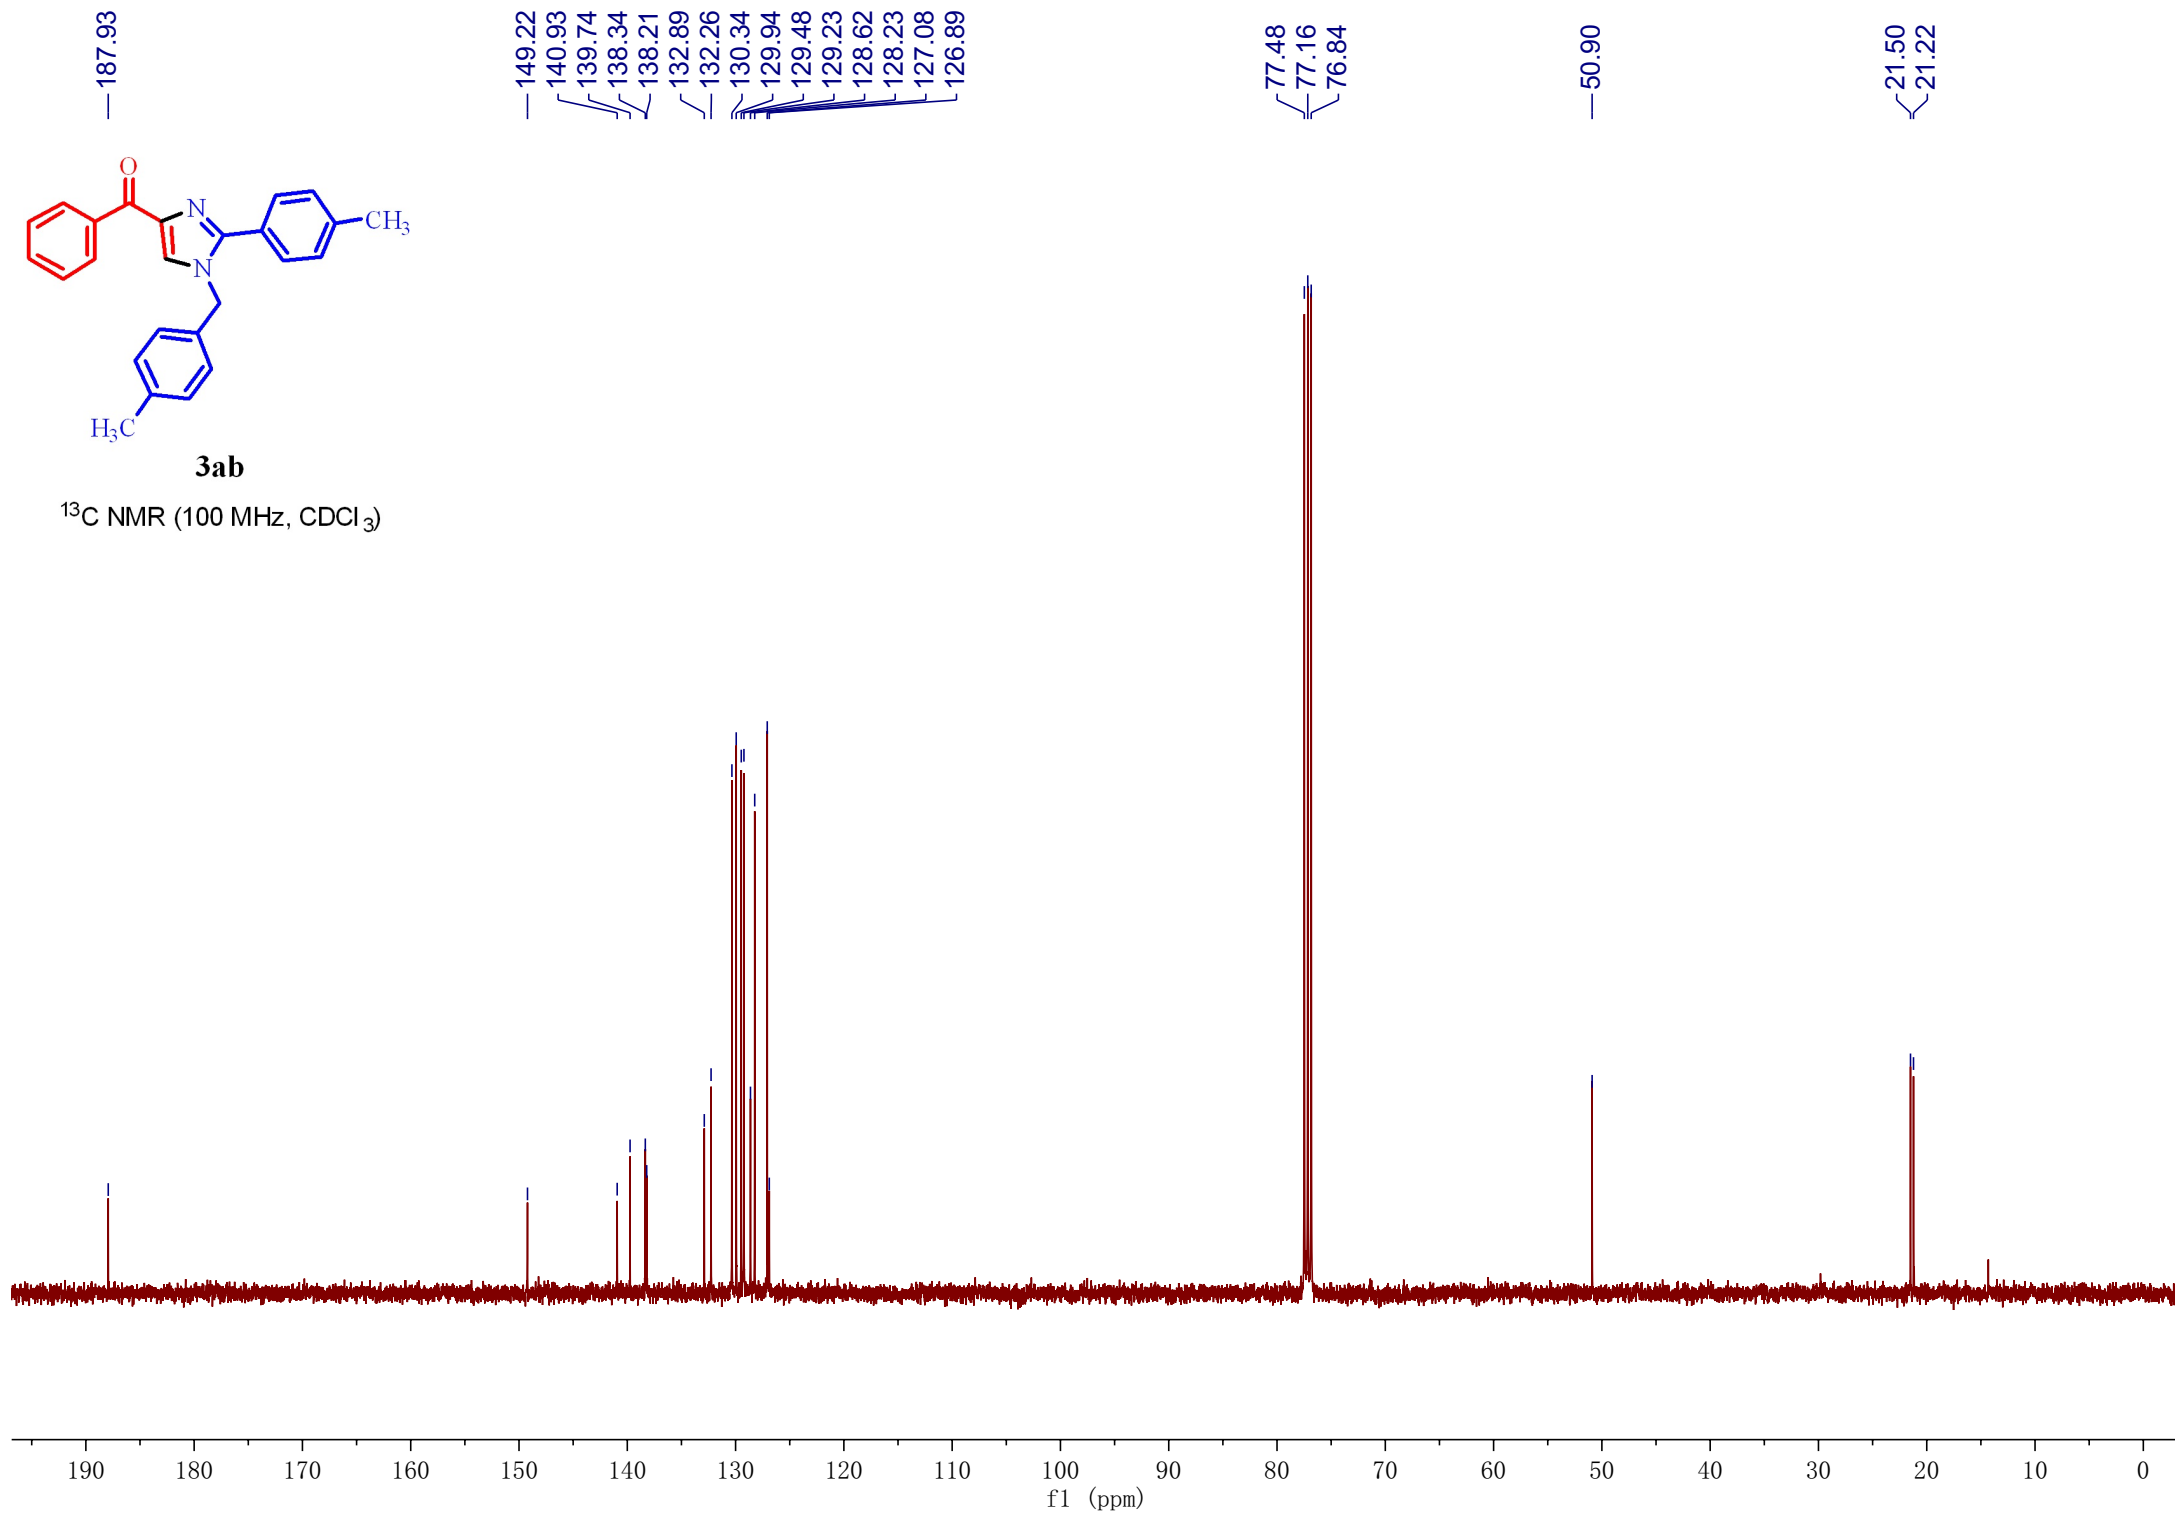

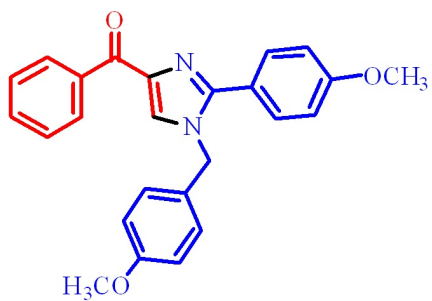

**3ac**

<sup>1</sup>H NMR (400 MHz, CDCl<sub>3</sub>)

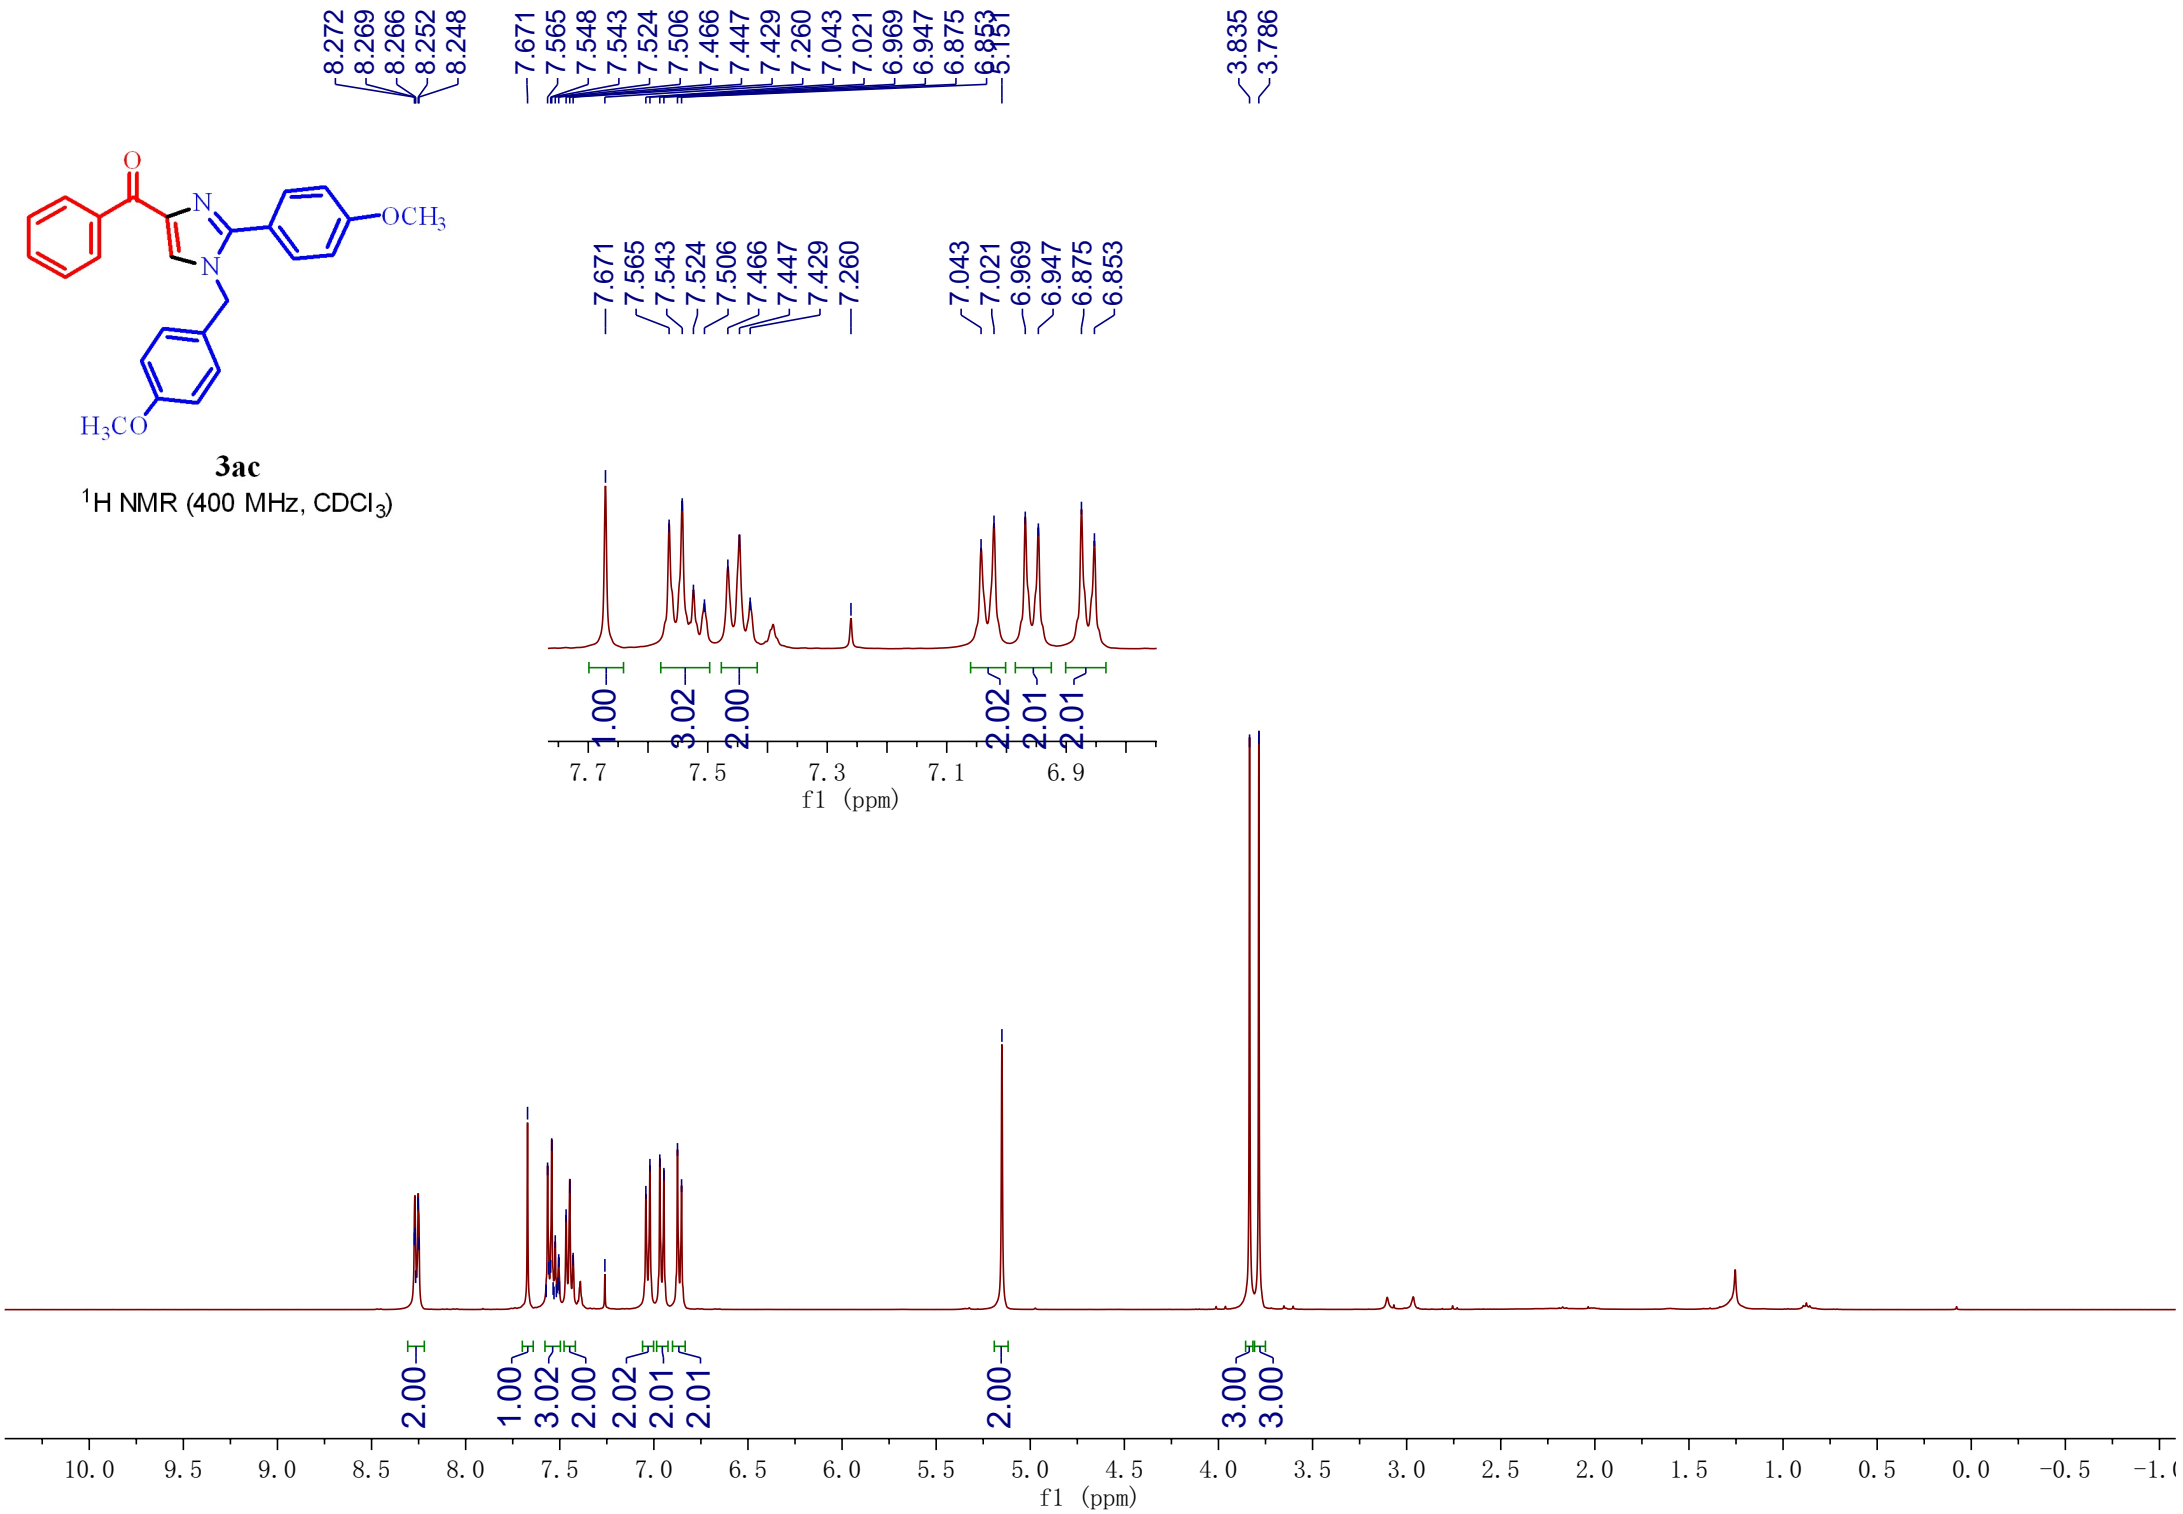

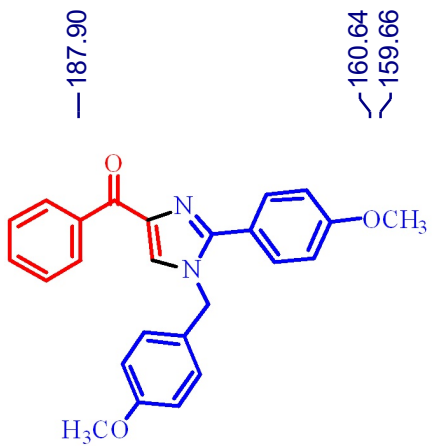

**3ac**

$^{13}\text{C}$  NMR (100 MHz,  $\text{CDCl}_3$ )

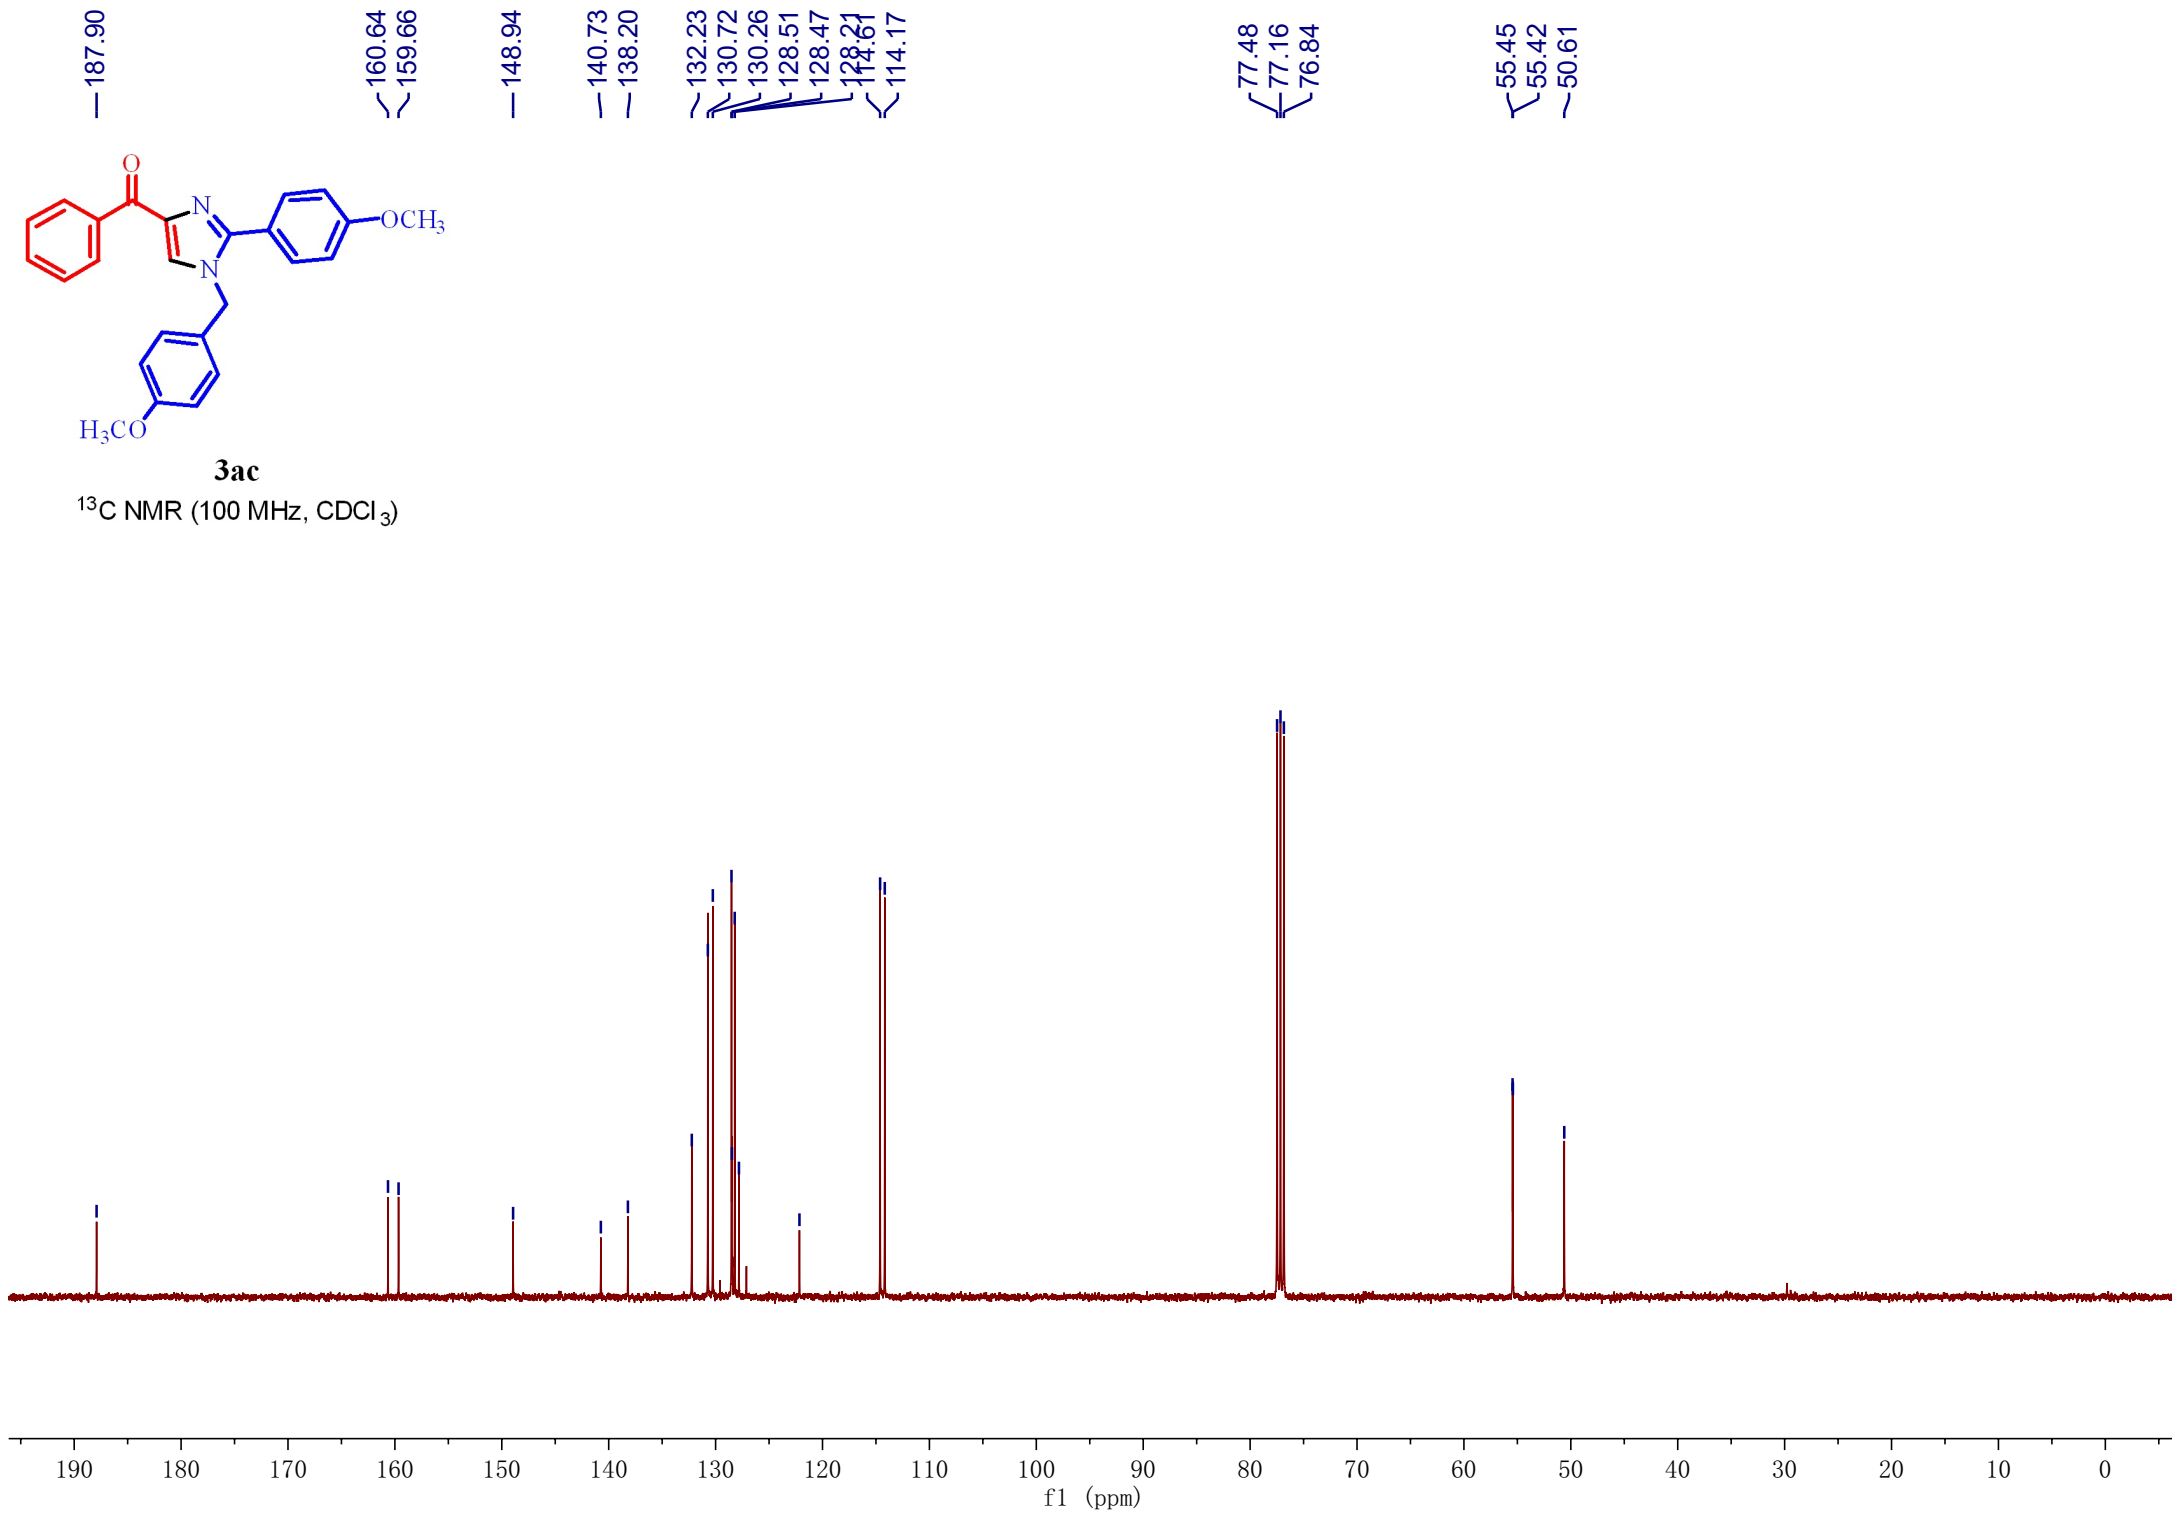

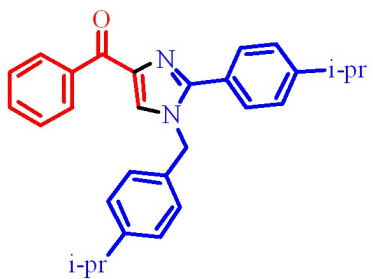

**3ad**

<sup>1</sup>H NMR (400 MHz, CDCl<sub>3</sub>)

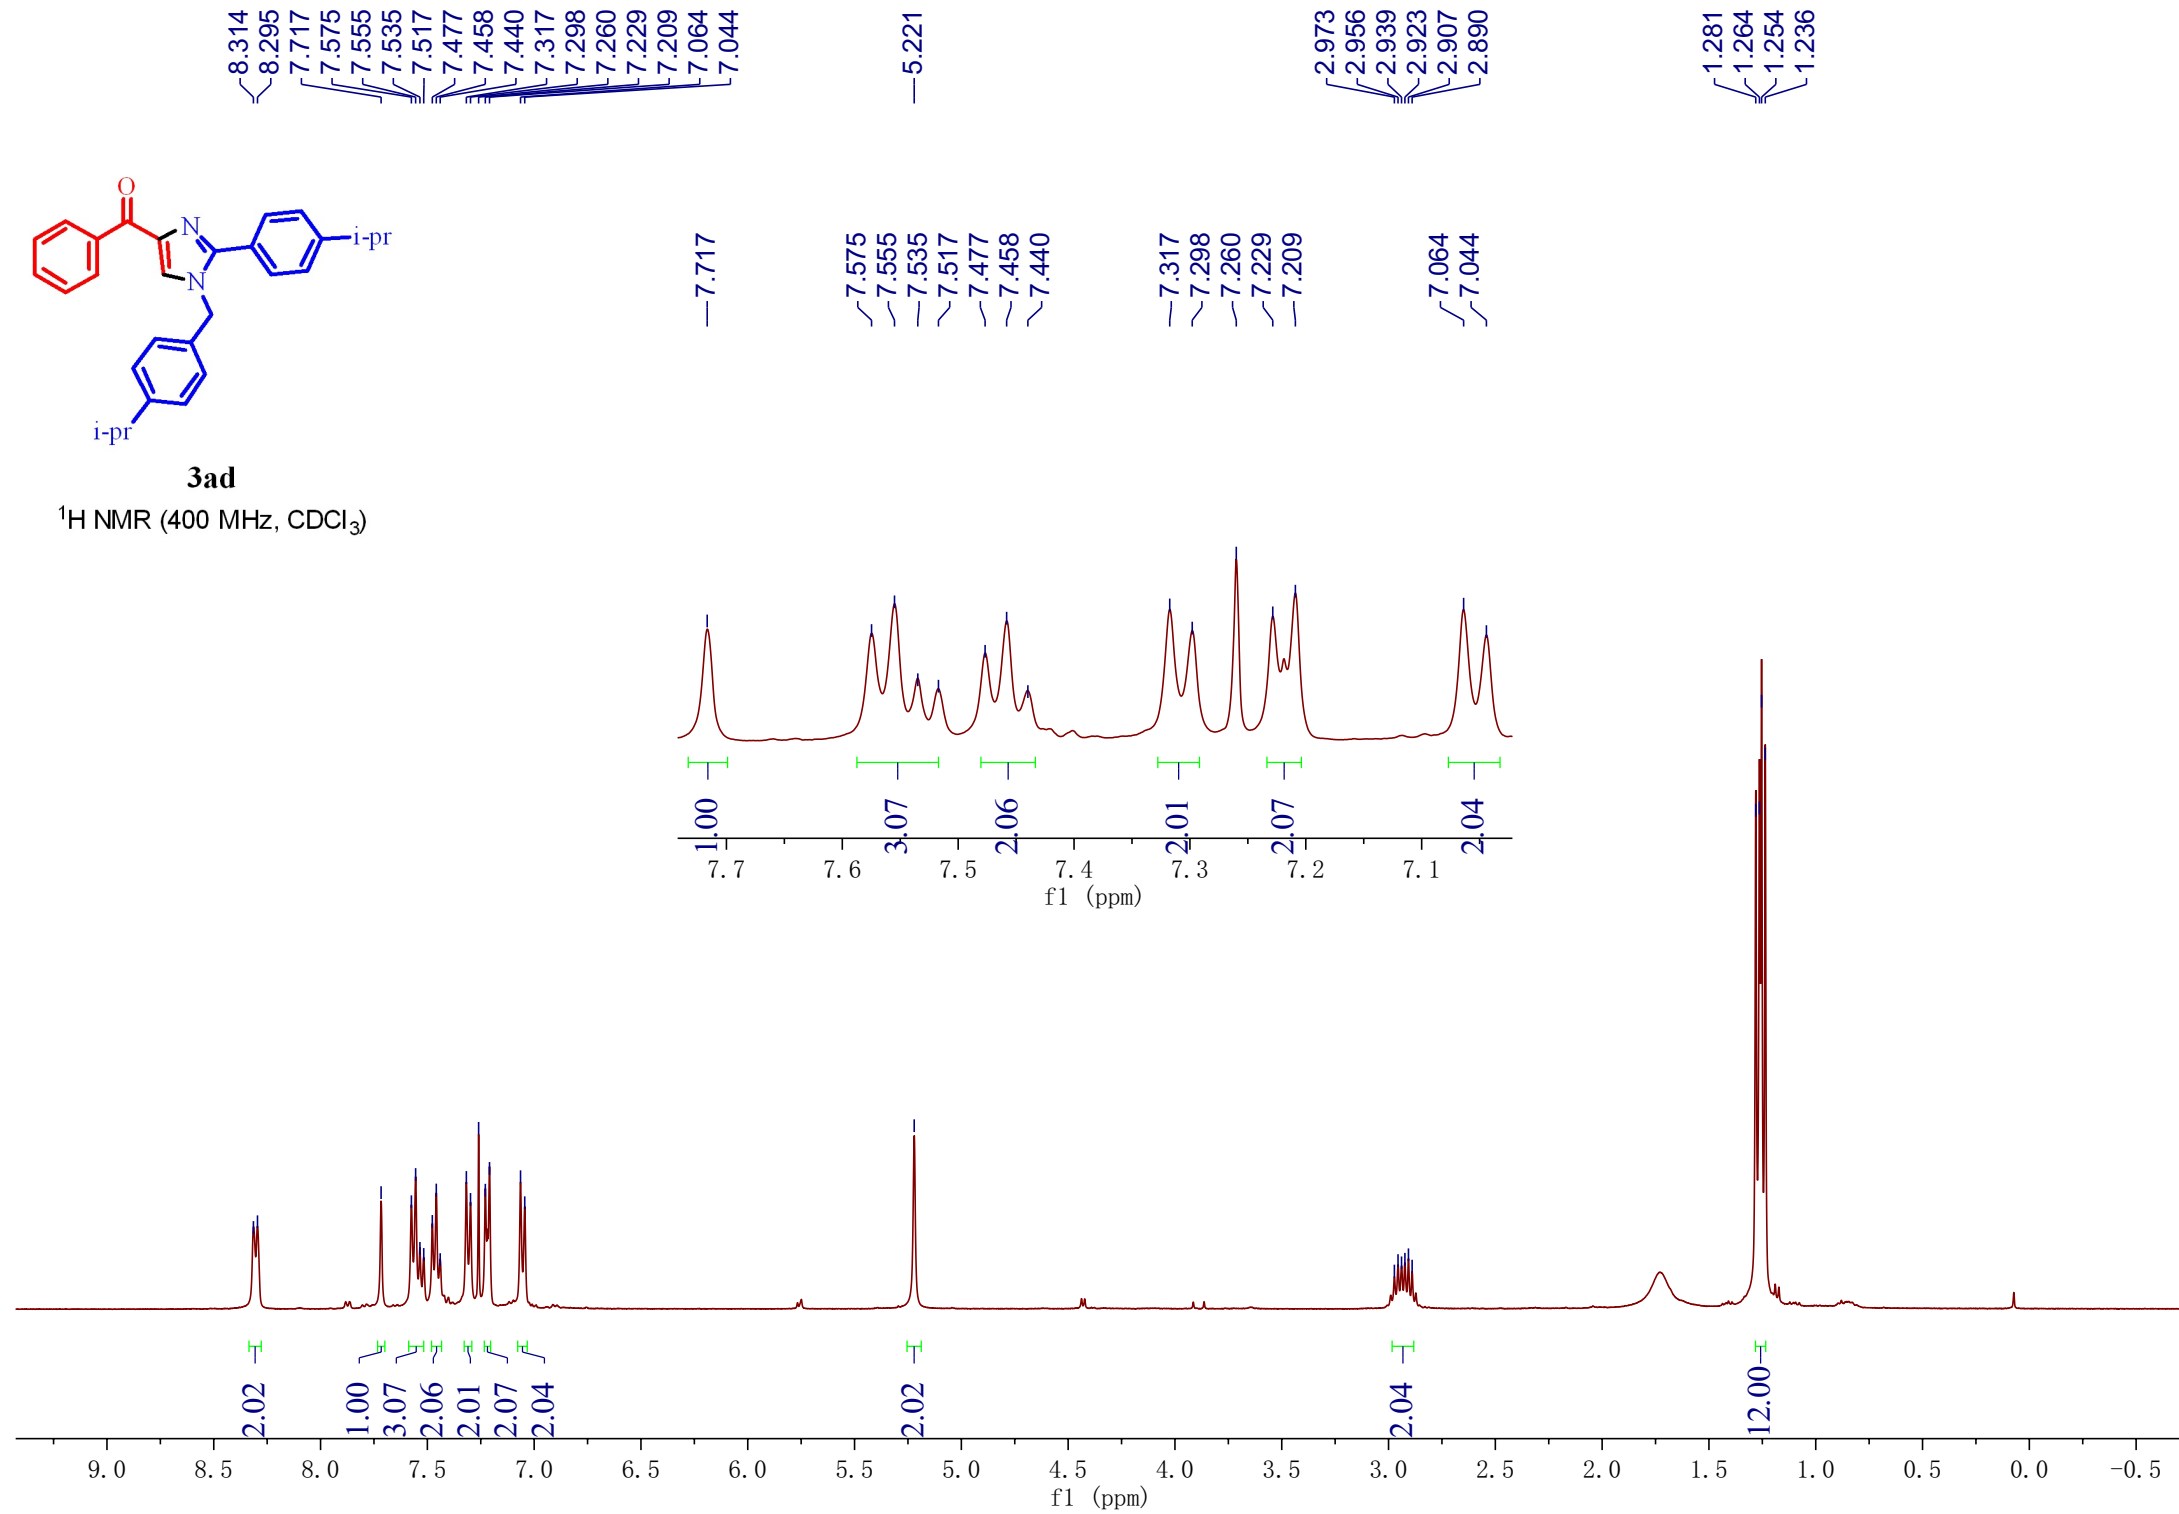

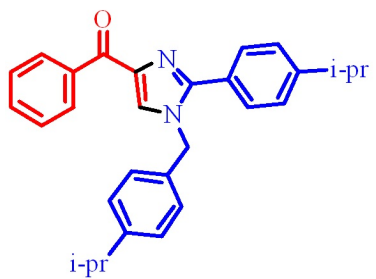

**3ad**

$^{13}\text{C}$  NMR (100 MHz,  $\text{CDCl}_3$ )

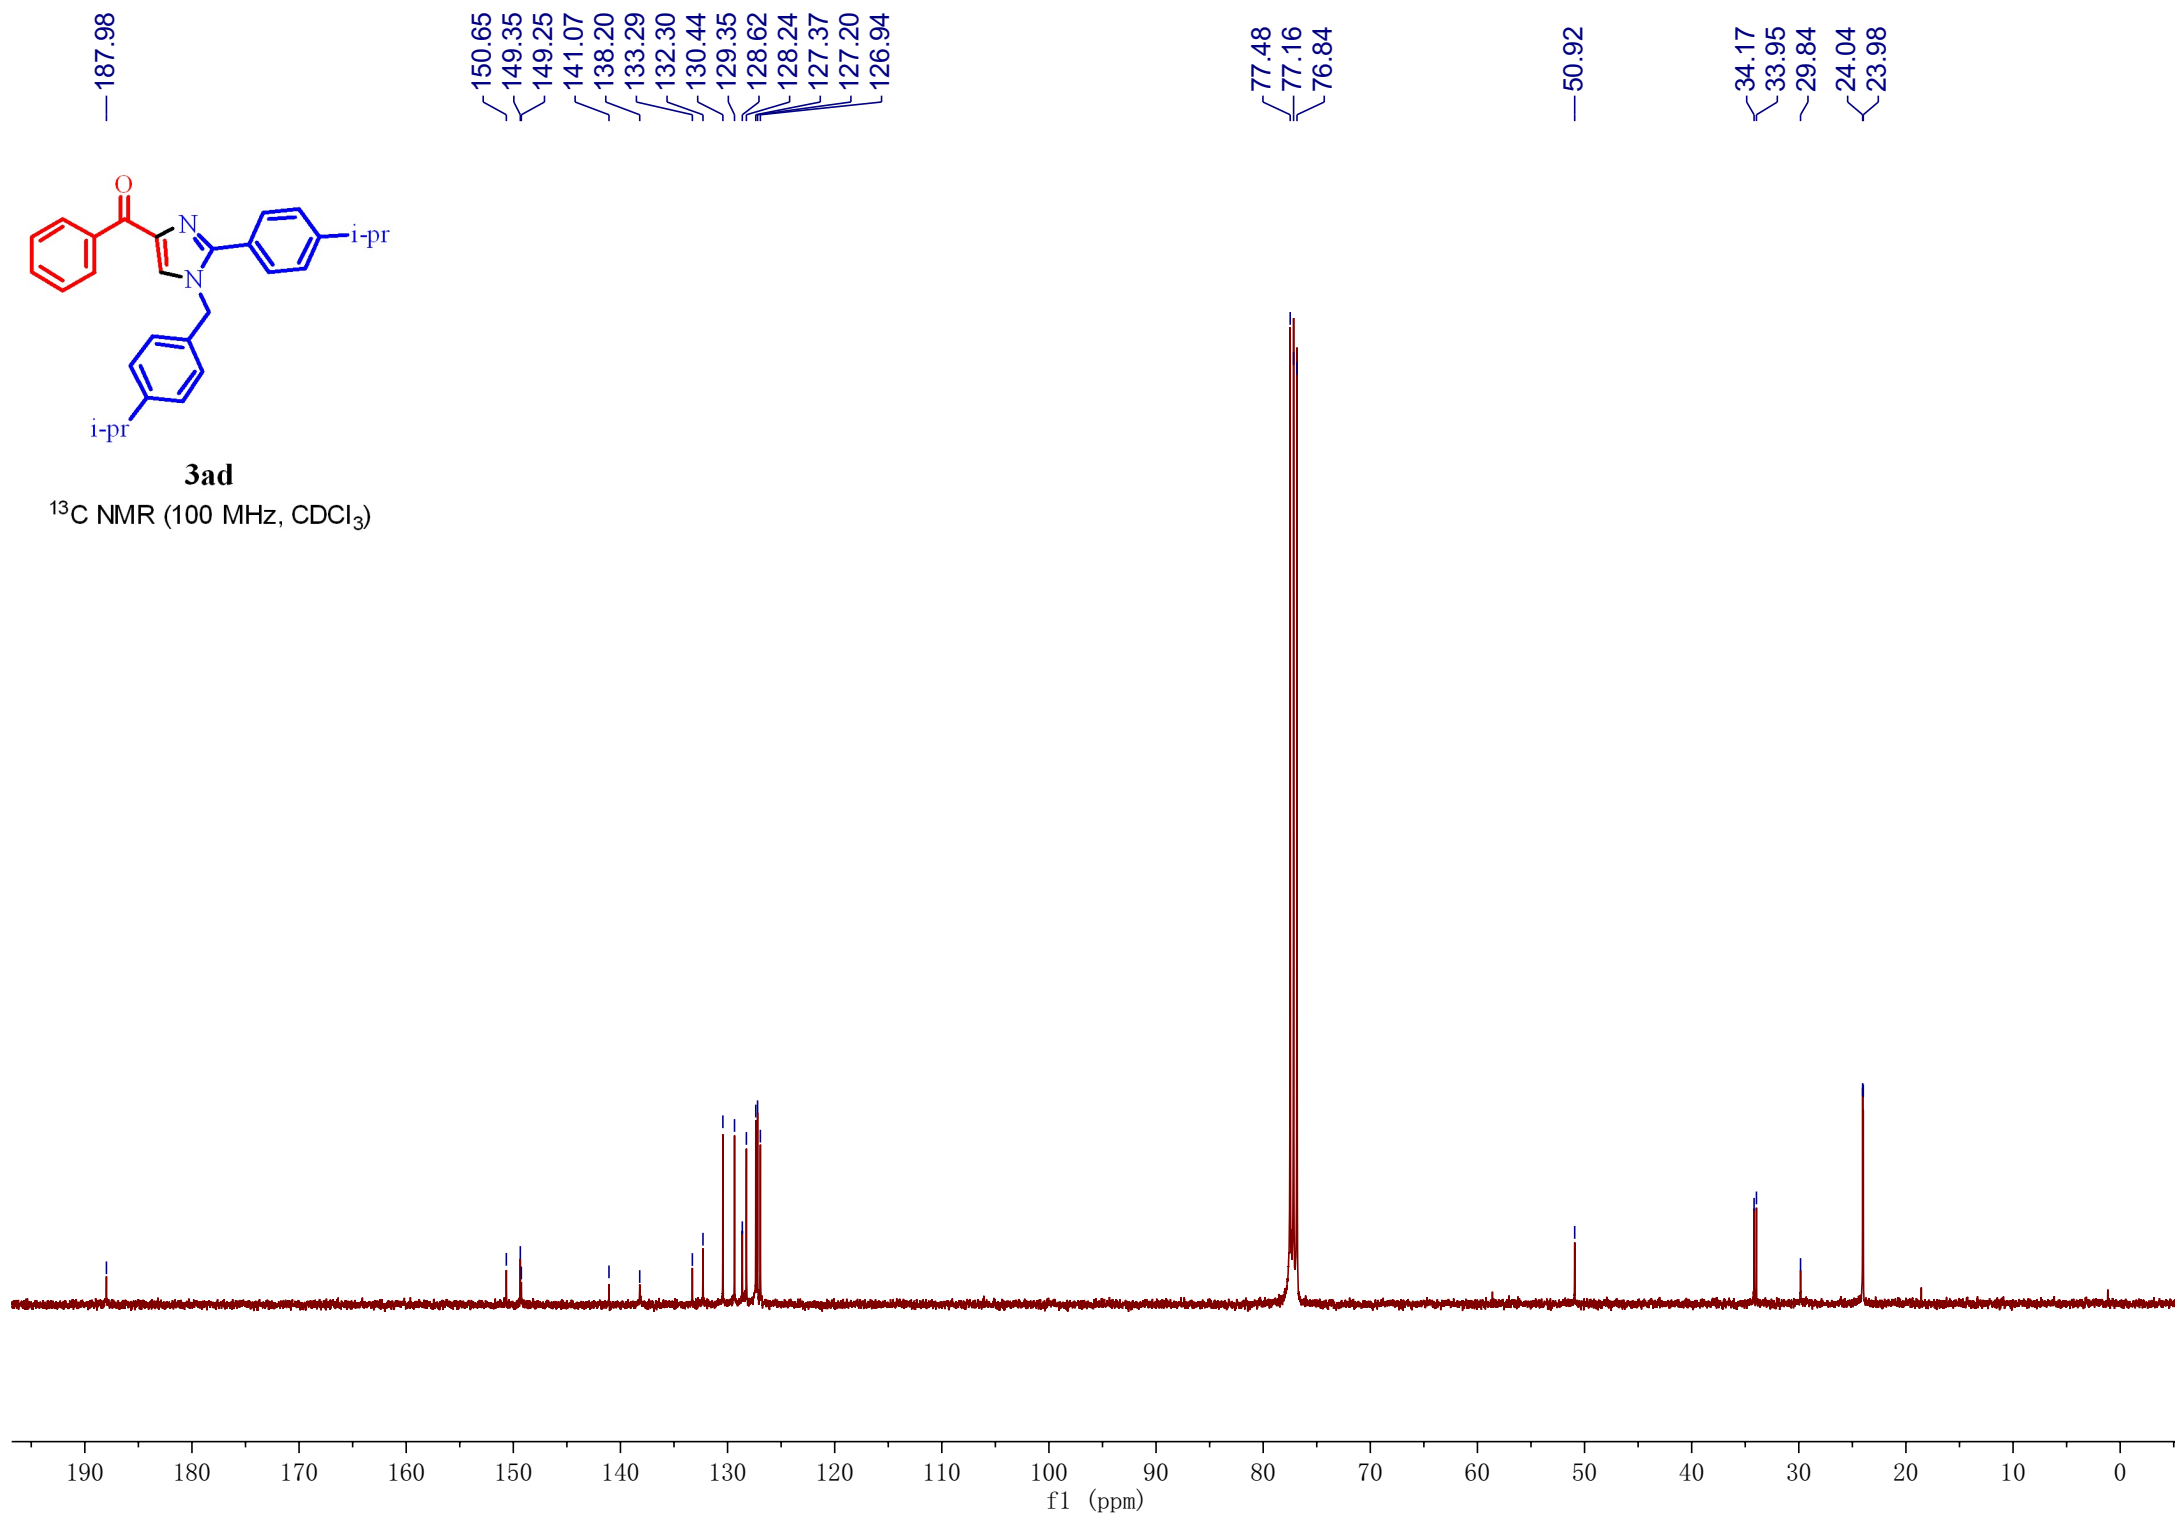

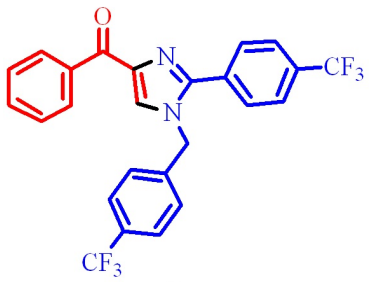

**3ae**

<sup>1</sup>H NMR (400 MHz, CDCl<sub>3</sub>)

8.312  
8.307  
8.295  
8.291  
8.288  
8.284  
7.788  
7.702  
7.638  
7.618  
7.563  
7.545  
7.541  
7.494  
7.491  
7.479  
7.475  
7.457  
7.454  
7.260  
7.217  
7.197

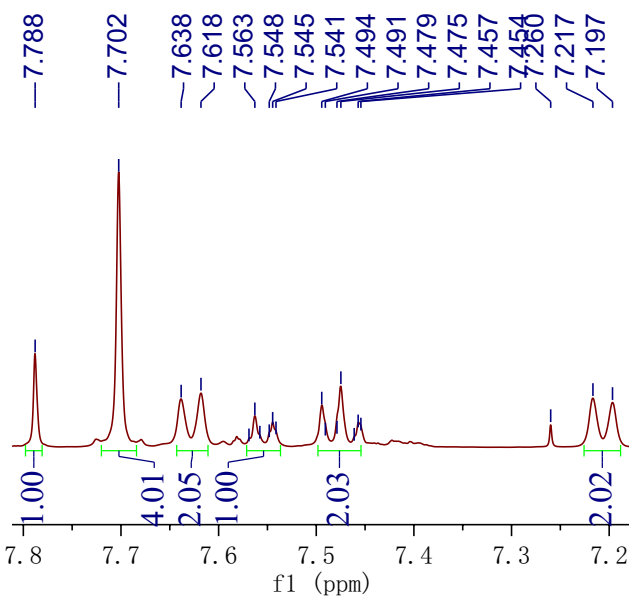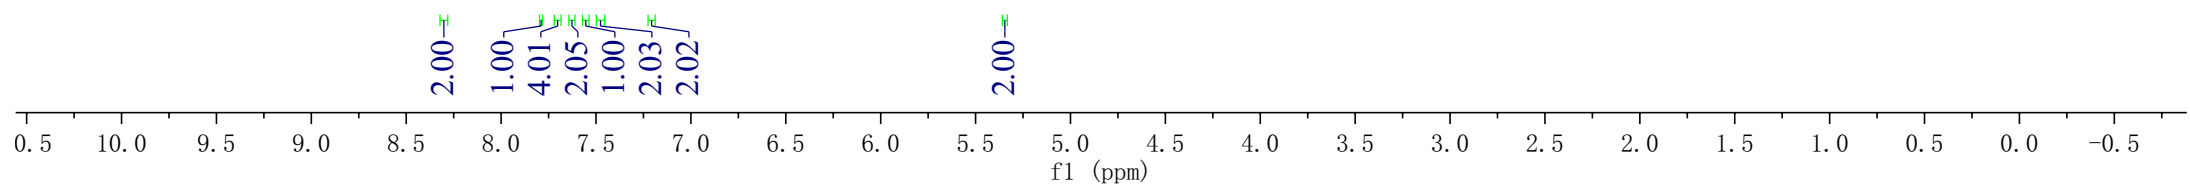



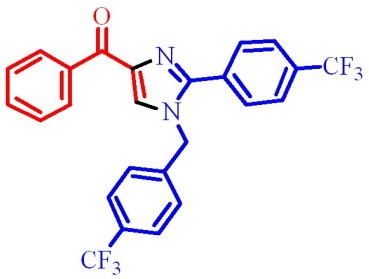

**3ae**

$^{13}\text{C}$  NMR (100 MHz,  $\text{CDCl}_3$ )

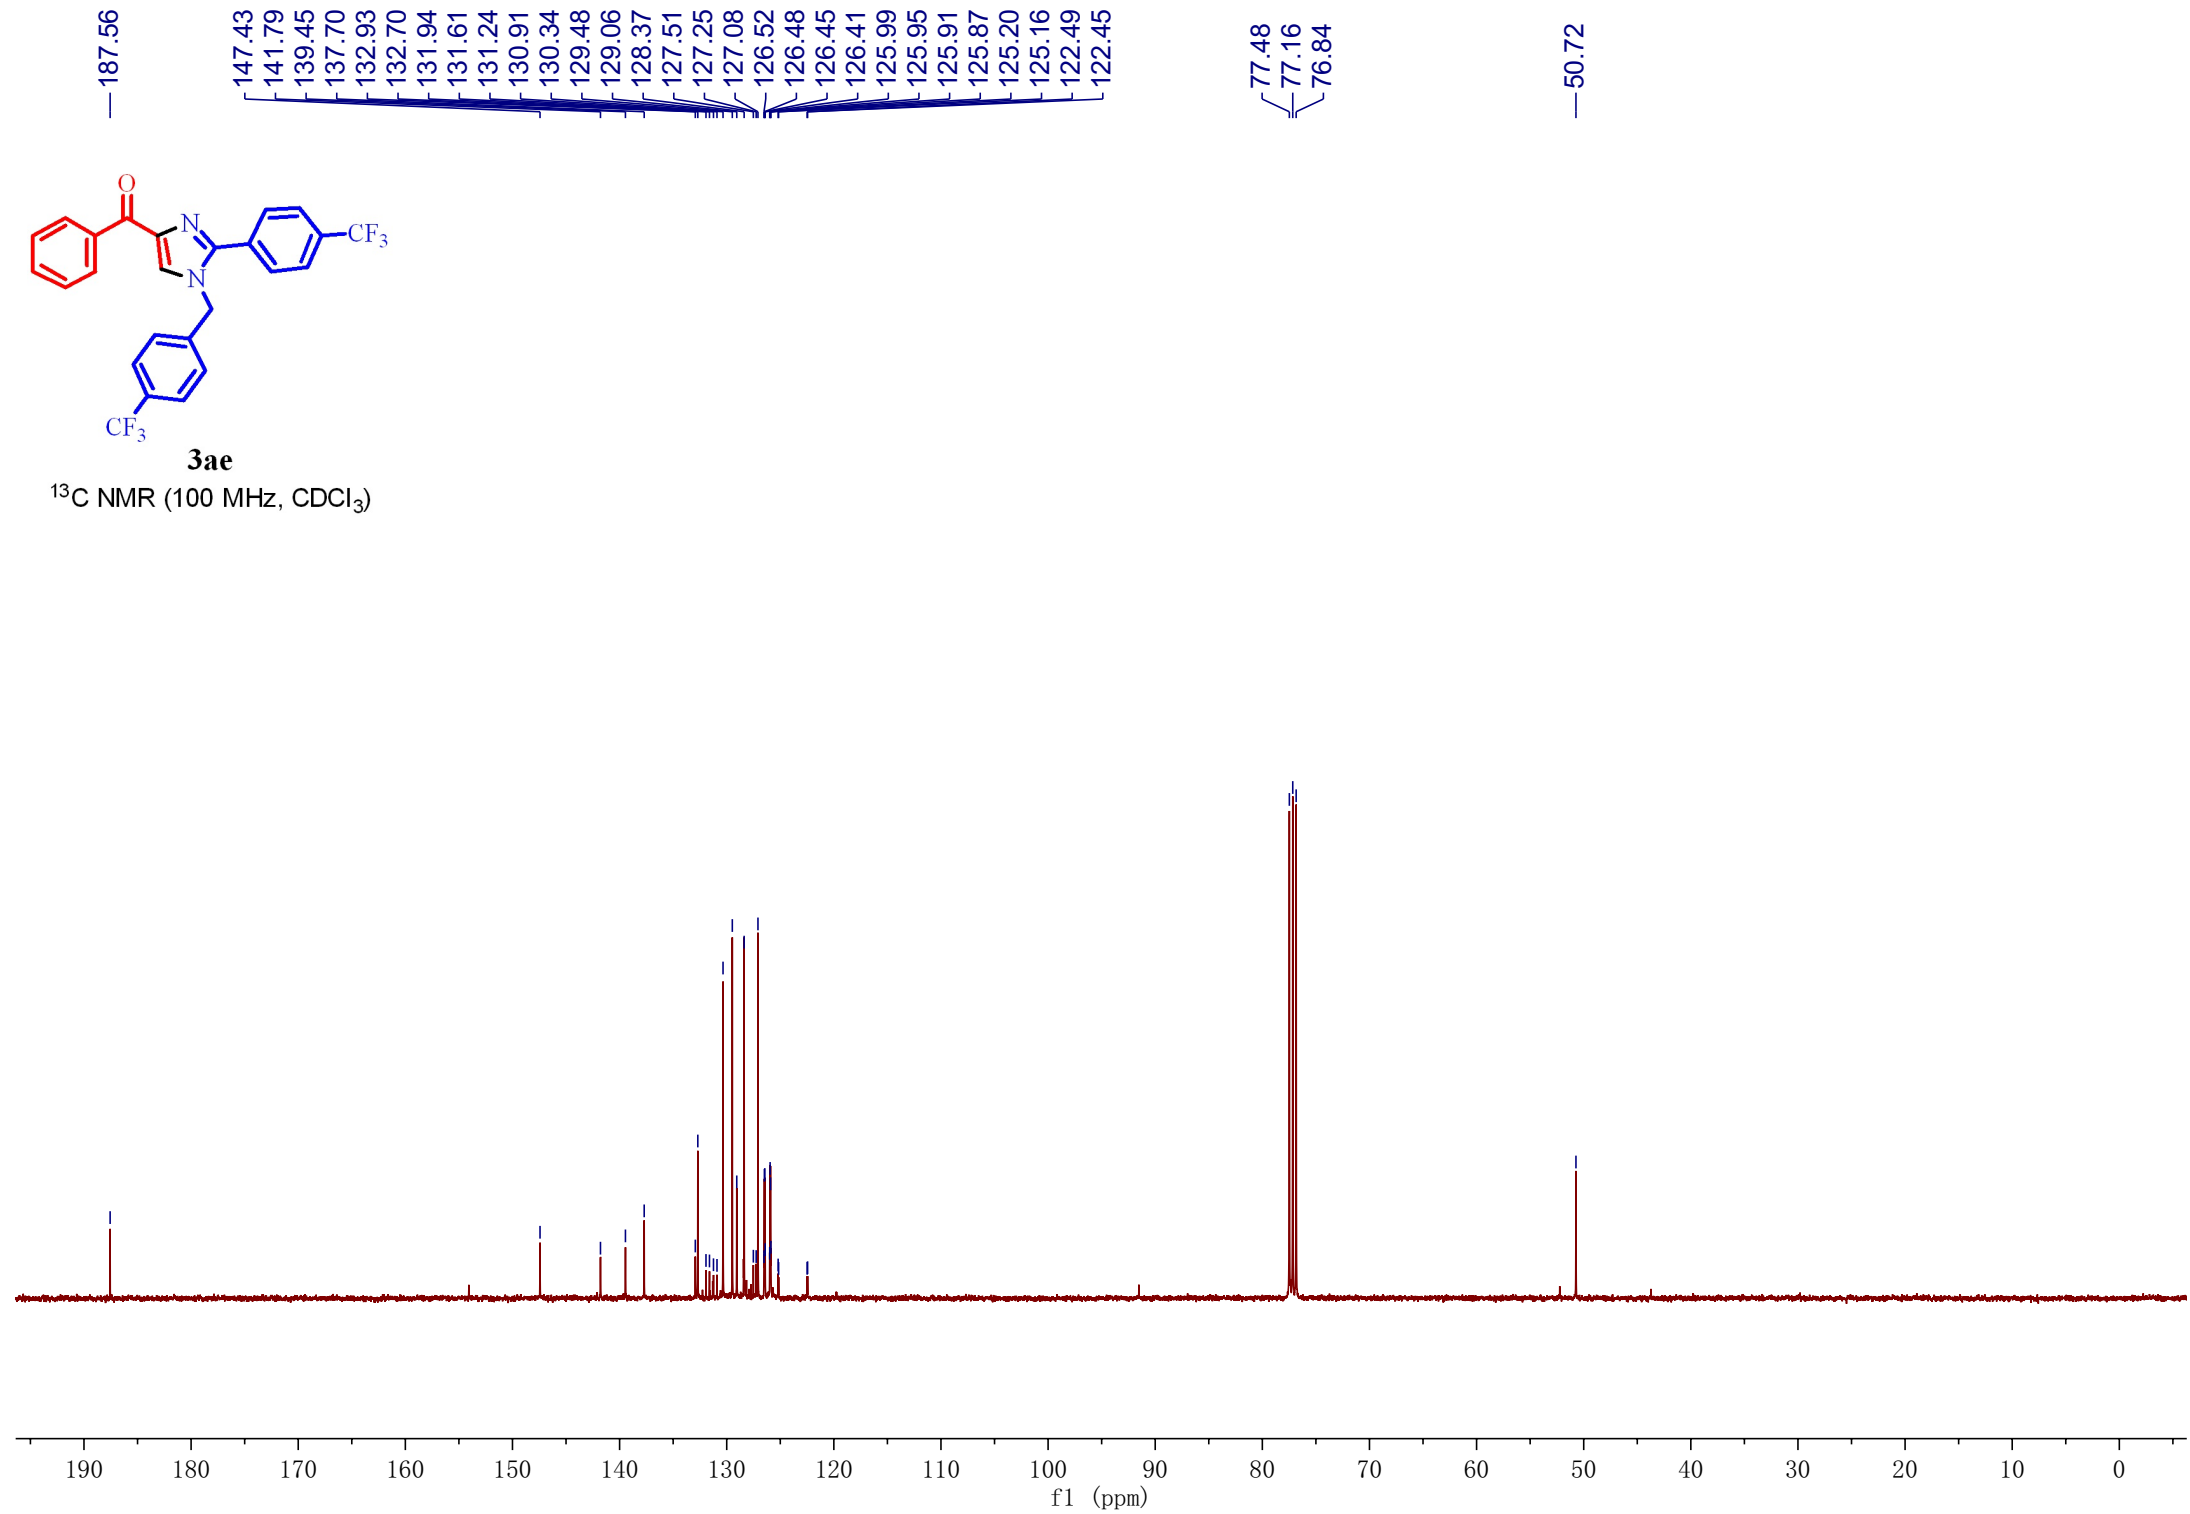

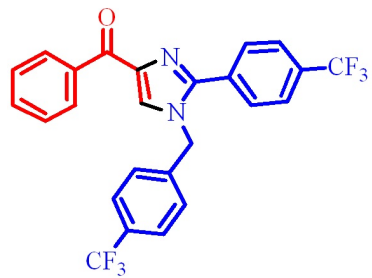

**3ae**

$^{19}\text{F}$  NMR (376 MHz,  $\text{CDCl}_3$ )

---62.76  
---62.89

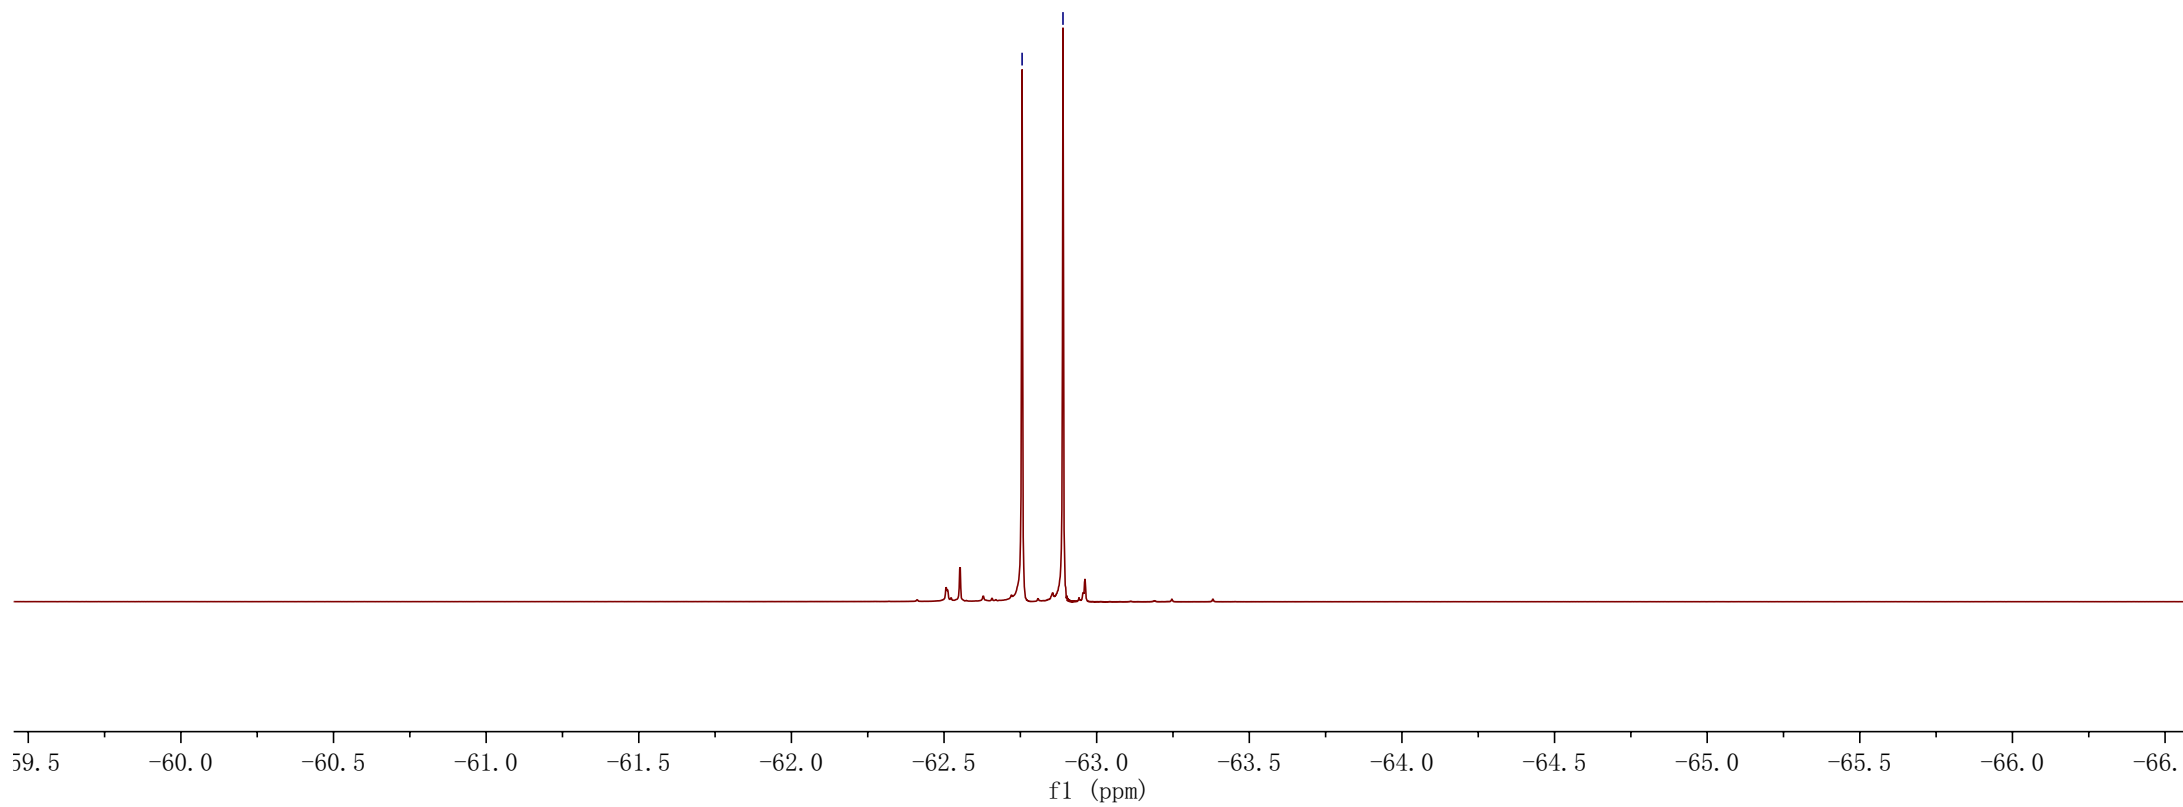

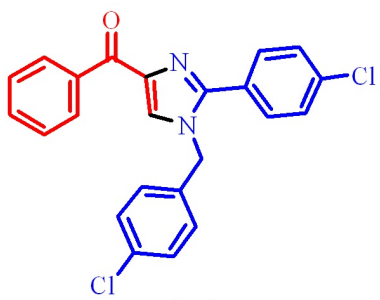

**3af**

<sup>1</sup>H NMR (400 MHz, CDCl<sub>3</sub>)

8.290  
8.285  
8.277  
8.272  
8.268  
7.732  
7.572  
7.554  
7.532  
7.511  
7.489  
7.470  
7.452  
7.427  
7.406  
7.345  
7.324  
7.260  
7.028  
7.007

5.212

7.732  
7.572  
7.554  
7.532  
7.511  
7.489  
7.470  
7.452  
7.427  
7.406  
7.345  
7.324  
7.260  
7.028  
7.007

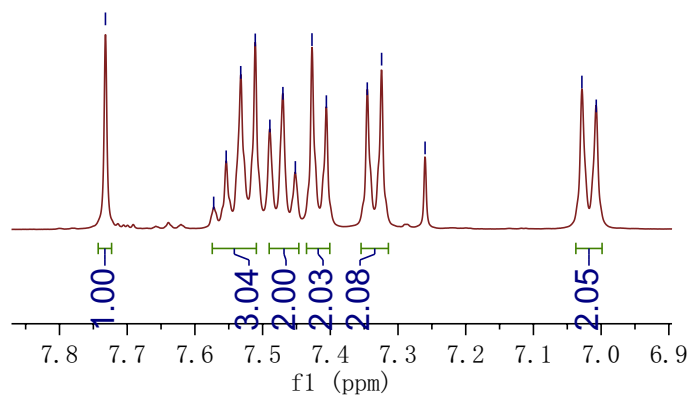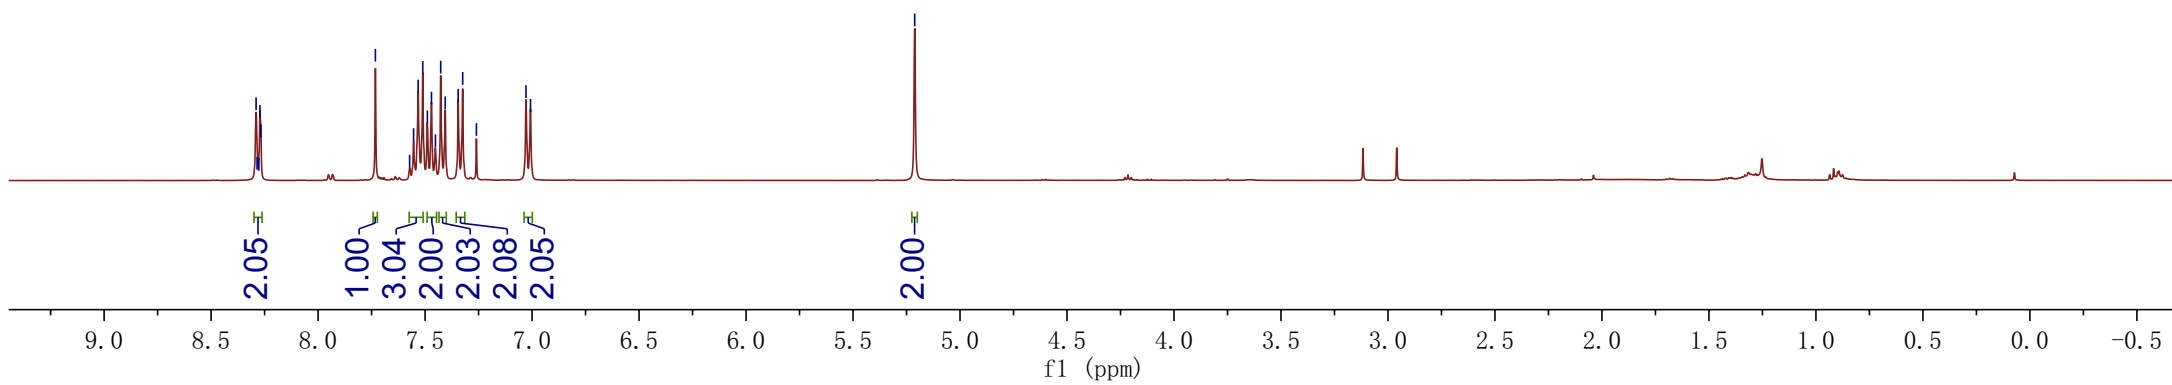

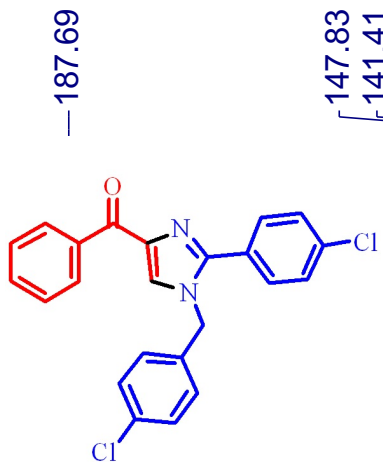

**3af**

$^{13}\text{C}$  NMR (100 MHz,  $\text{CDCl}_3$ )

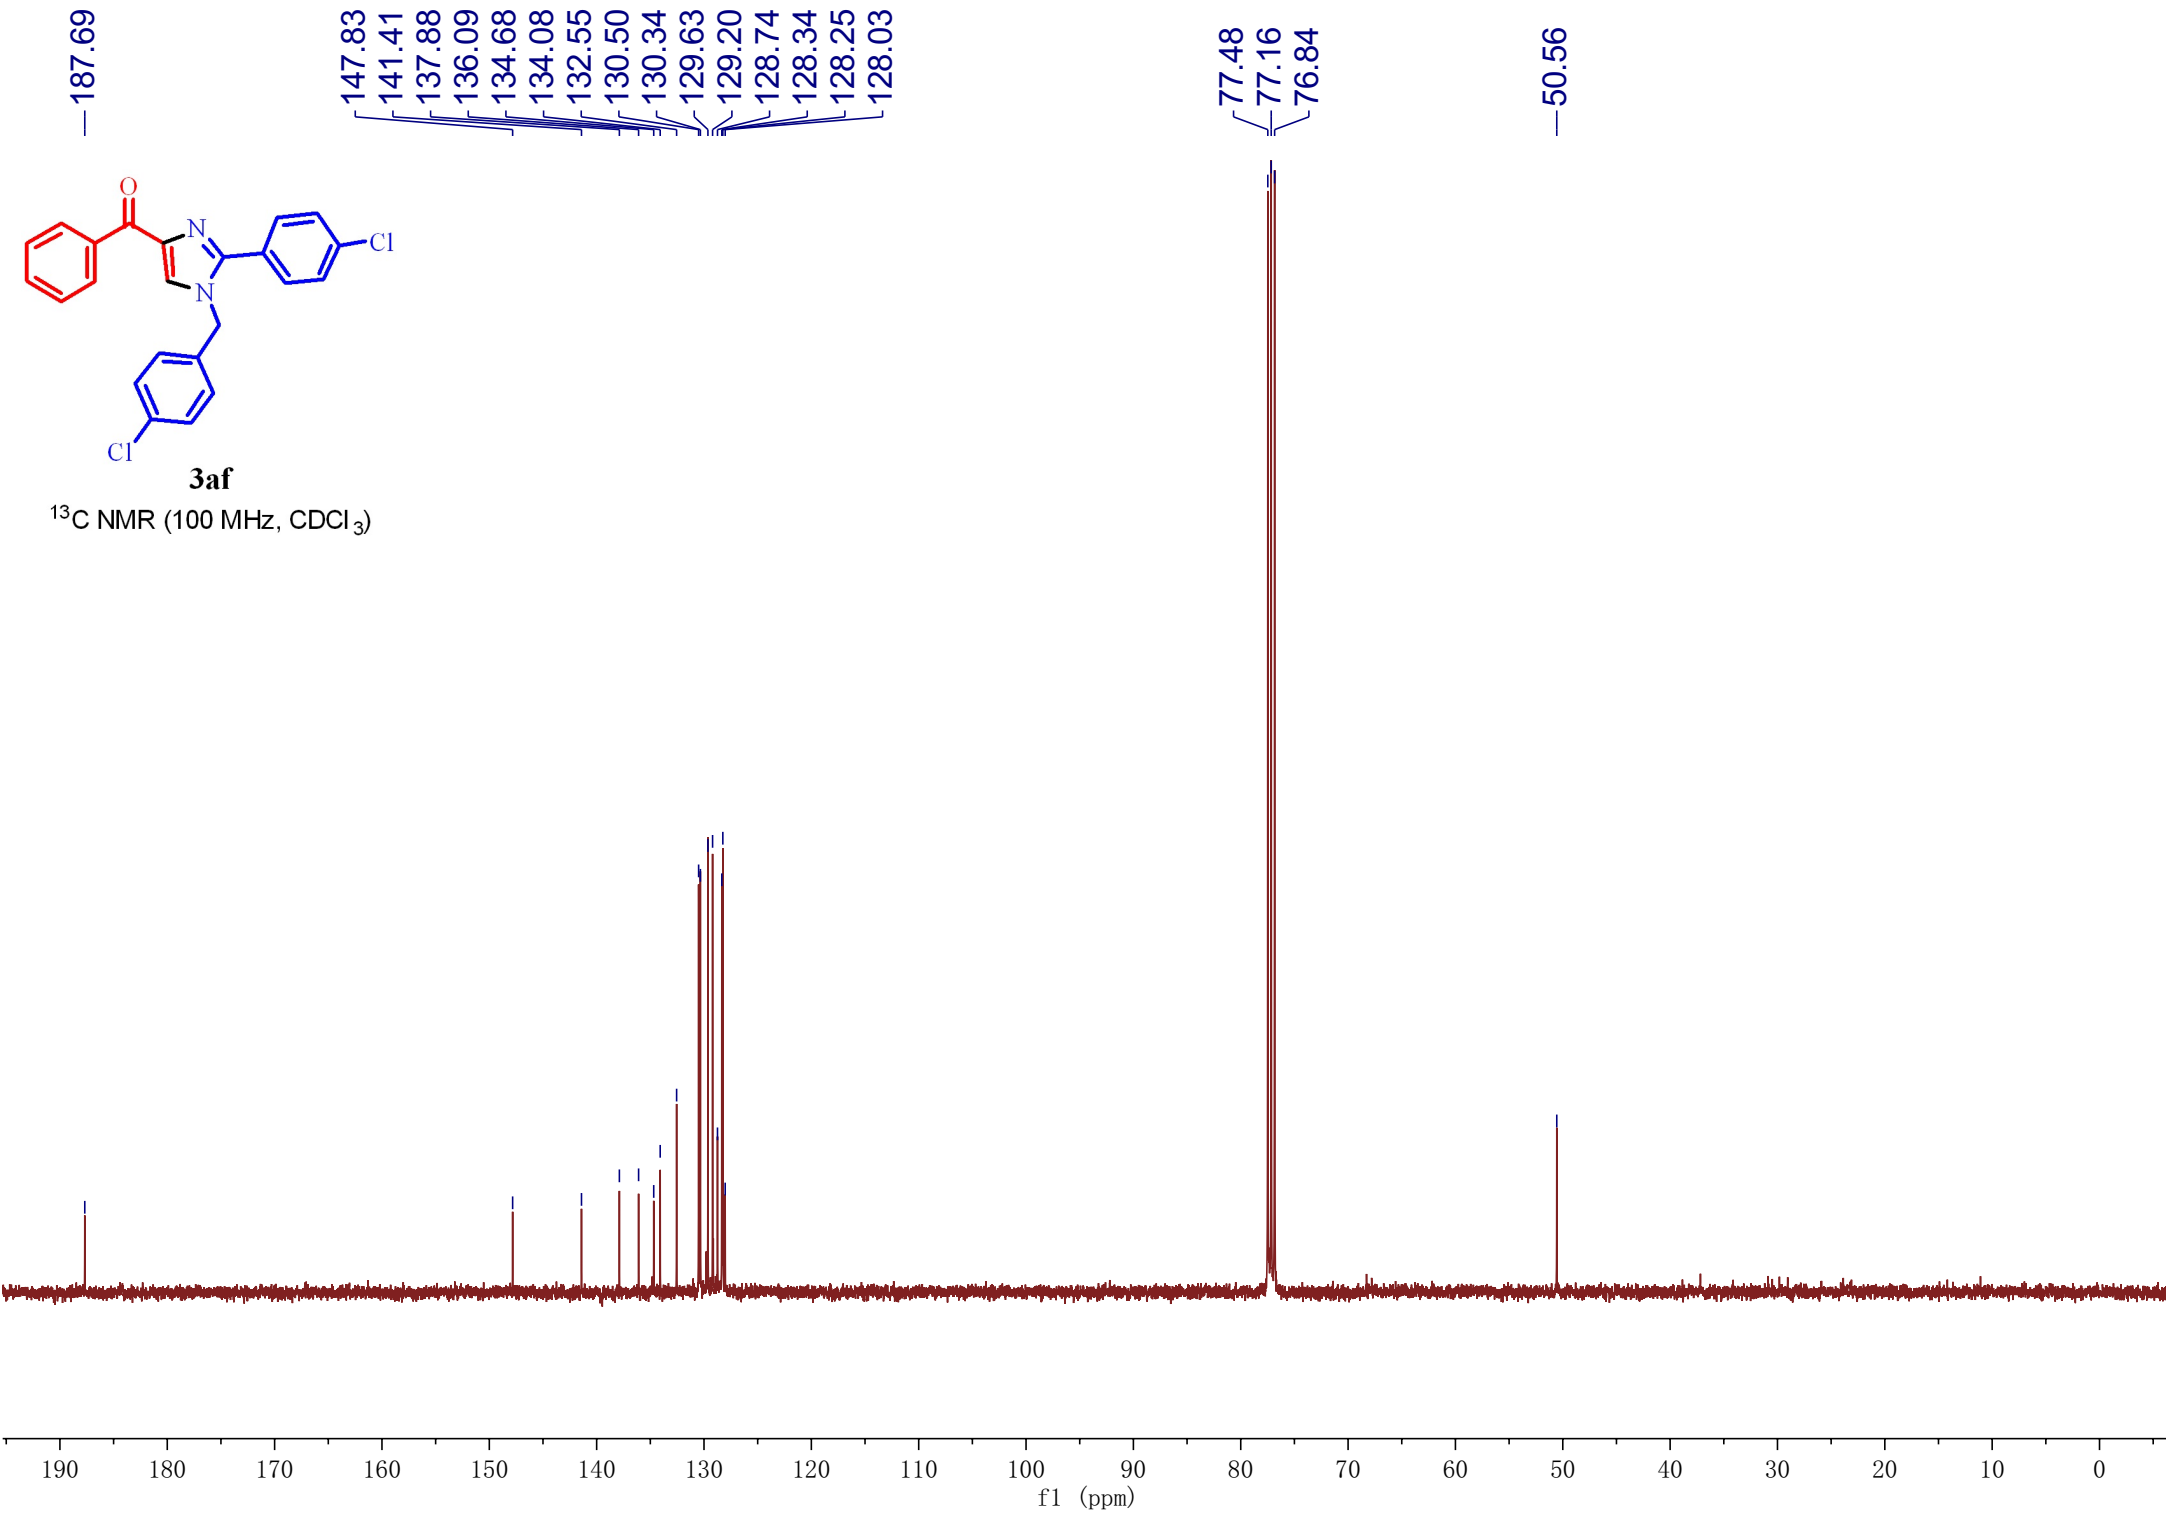

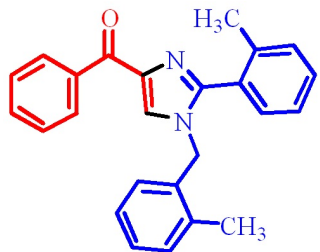

**3ag**

<sup>1</sup>H NMR (400 MHz, CDCl<sub>3</sub>)

8.224  
8.205  
7.582  
7.450  
7.431  
7.413  
7.376  
7.357  
7.338  
7.285  
7.267  
7.234  
7.215  
7.174  
7.156  
7.143  
7.126  
7.098  
7.080  
7.067  
7.049  
6.882  
6.863

2.186  
1.987

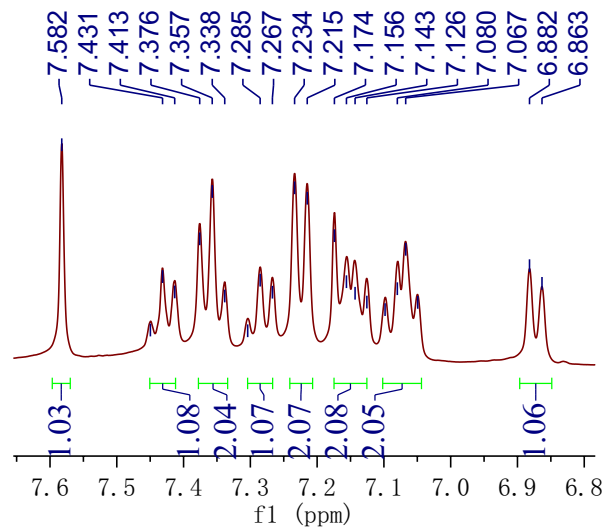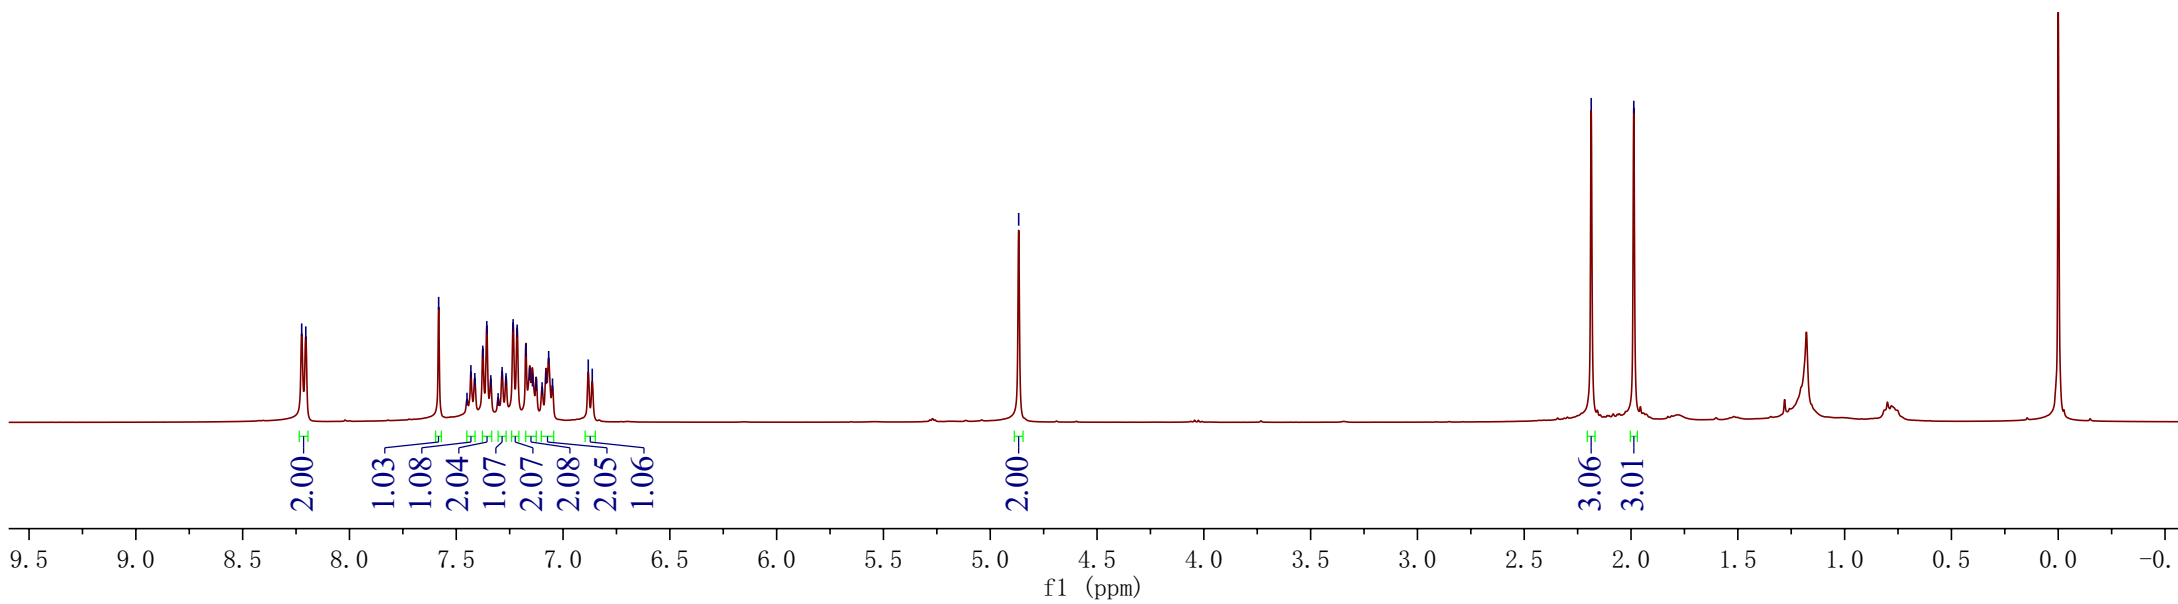

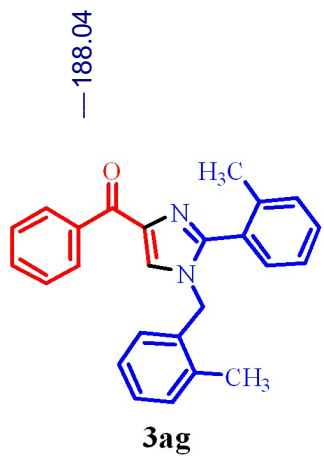

<sup>13</sup>C NMR (100 MHz, CDCl<sub>3</sub>)

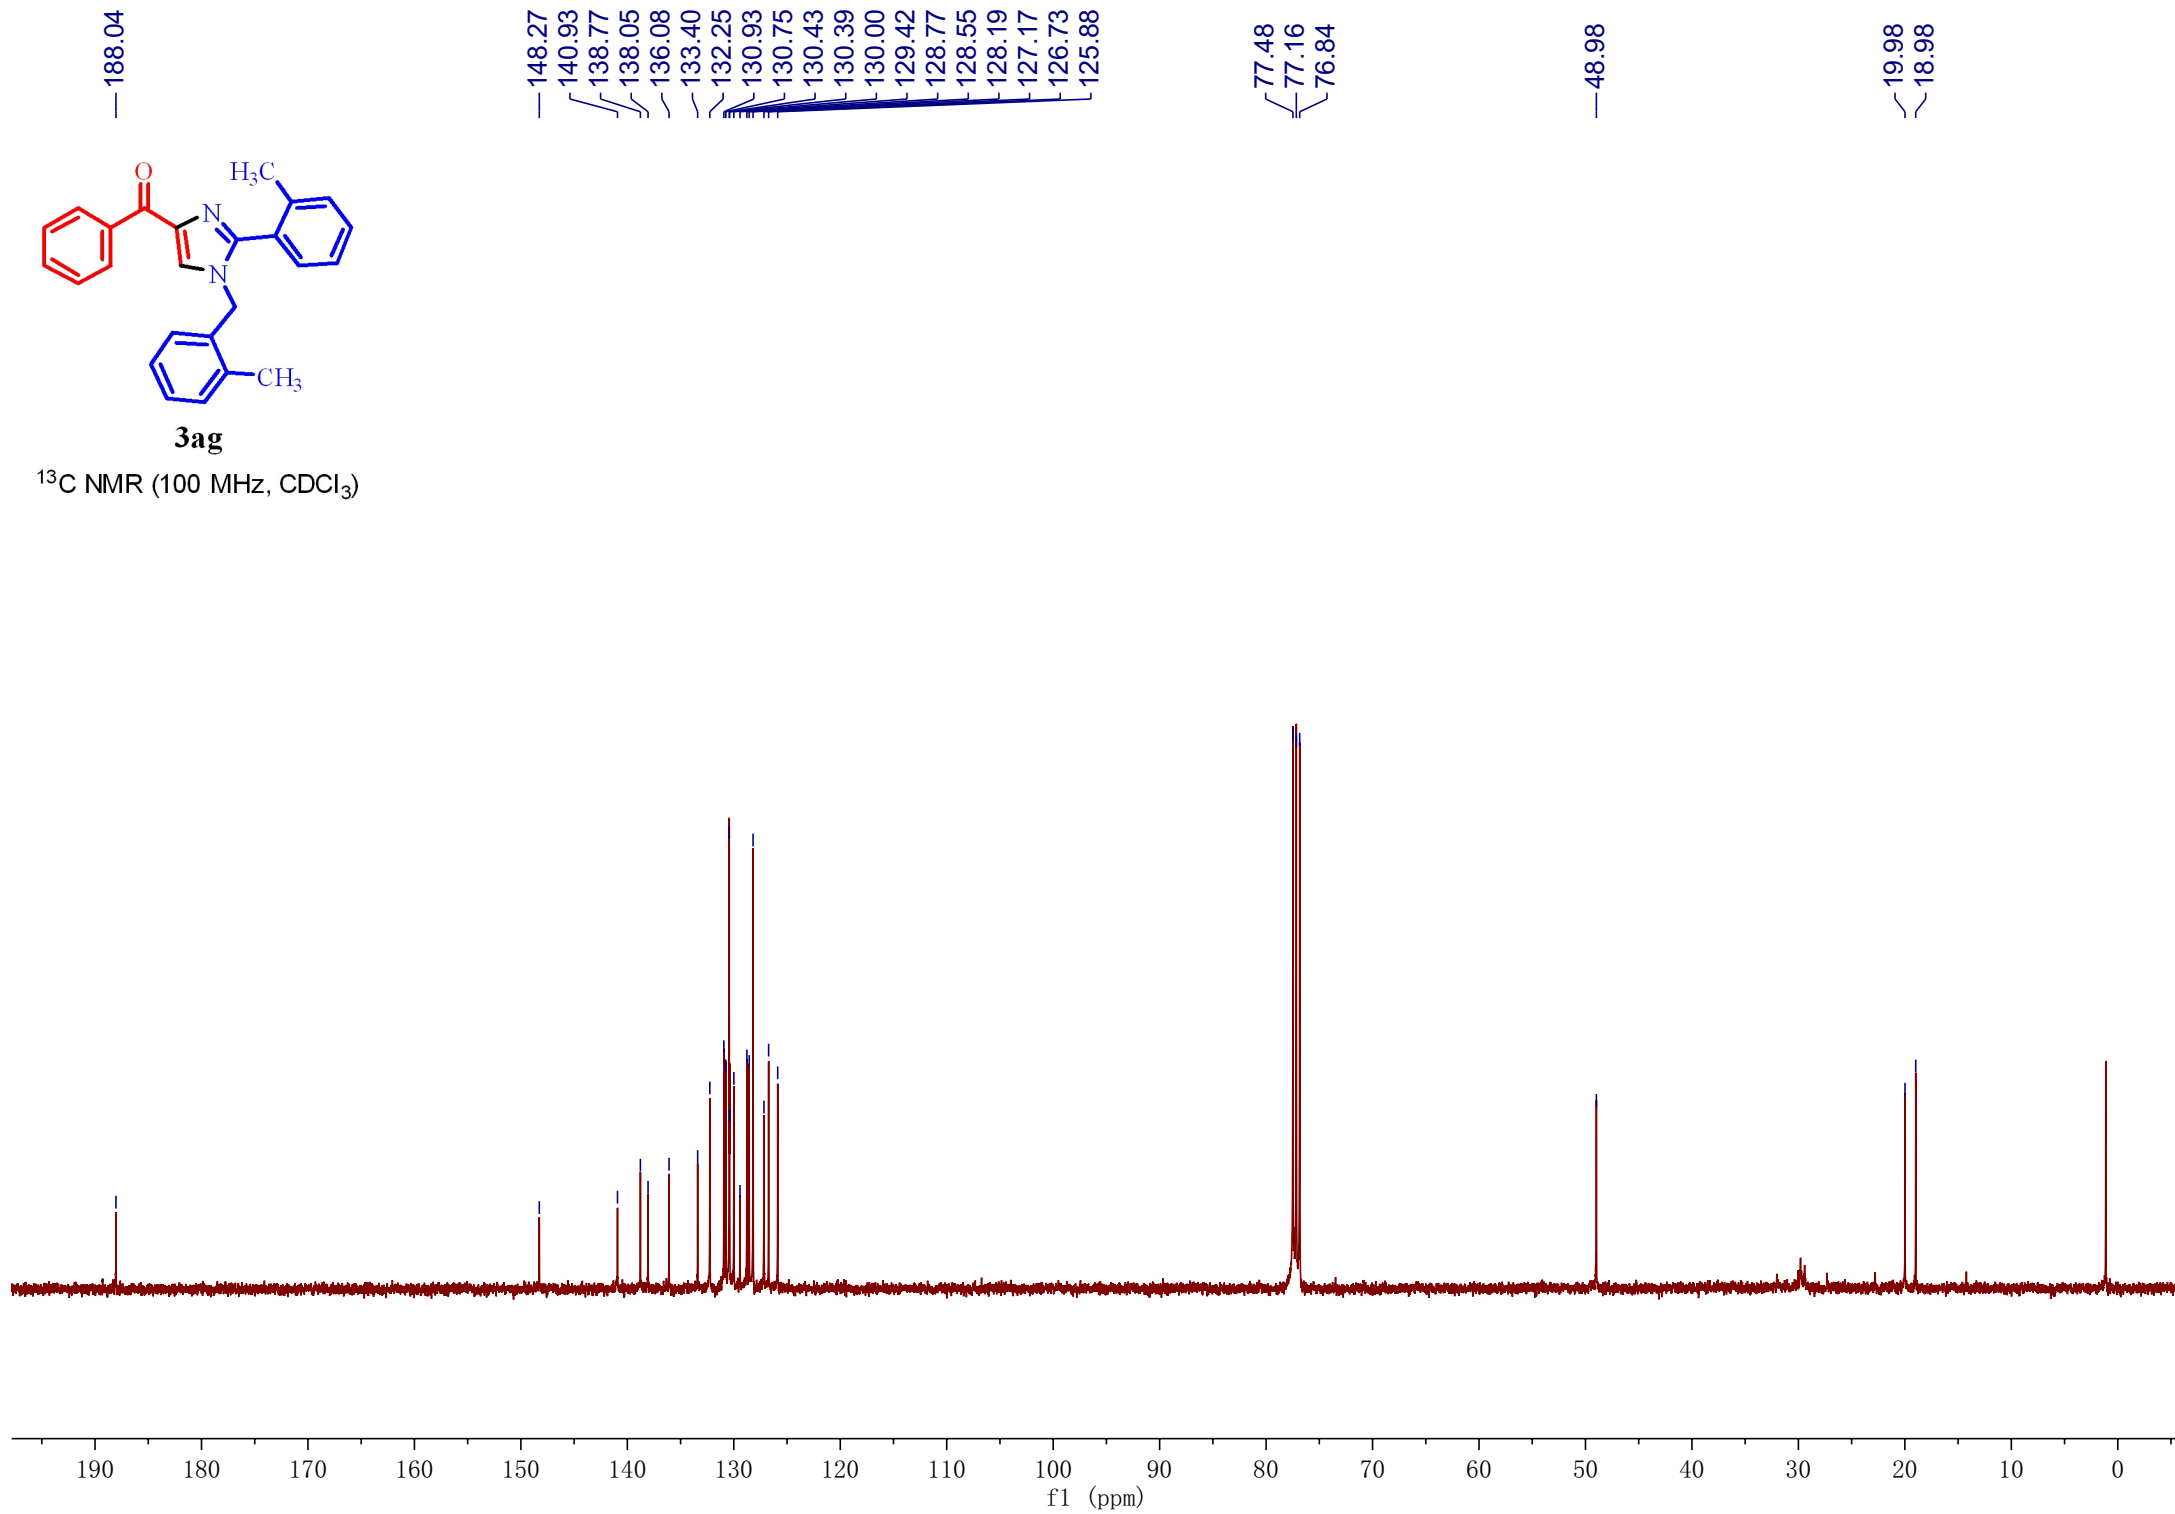

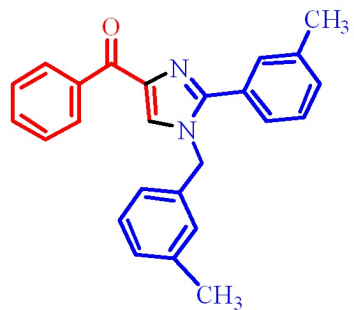

**3ah**

<sup>1</sup>H NMR (400 MHz, CDCl<sub>3</sub>)

8.226  
8.208  
7.643  
7.470  
7.452  
7.434  
7.396  
7.378  
7.359  
7.301  
7.282  
7.253  
7.234  
7.215  
7.186  
7.173  
7.160  
7.139  
7.061  
7.041  
6.837

5.114

2.297  
2.241

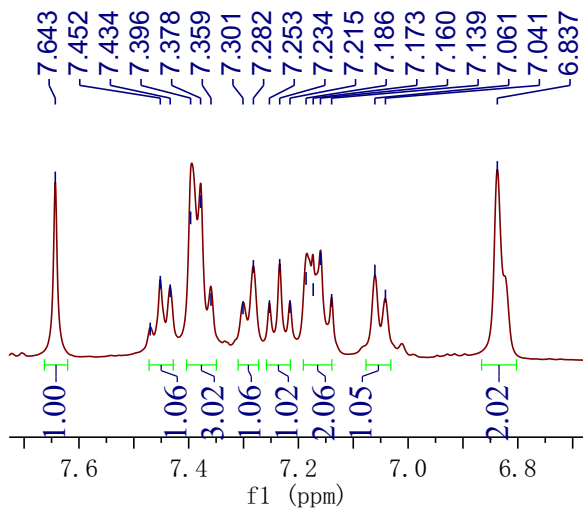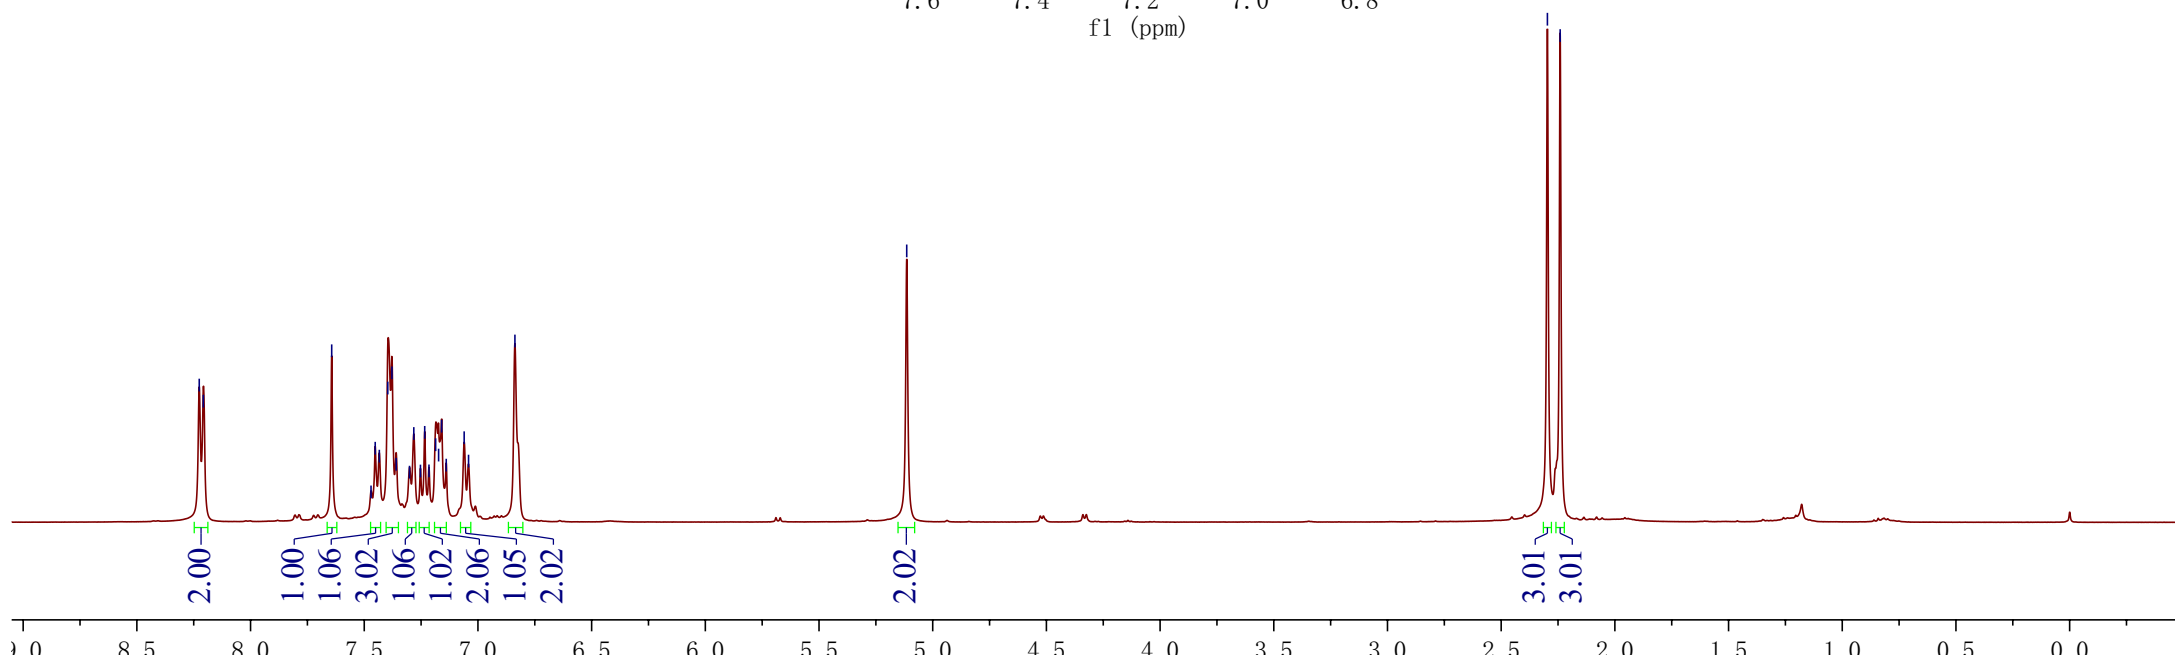

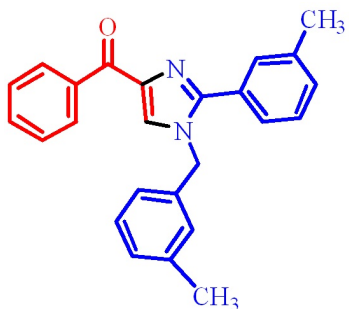

**3ah**

$^{13}\text{C}$  NMR (100 MHz,  $\text{CDCl}_3$ )

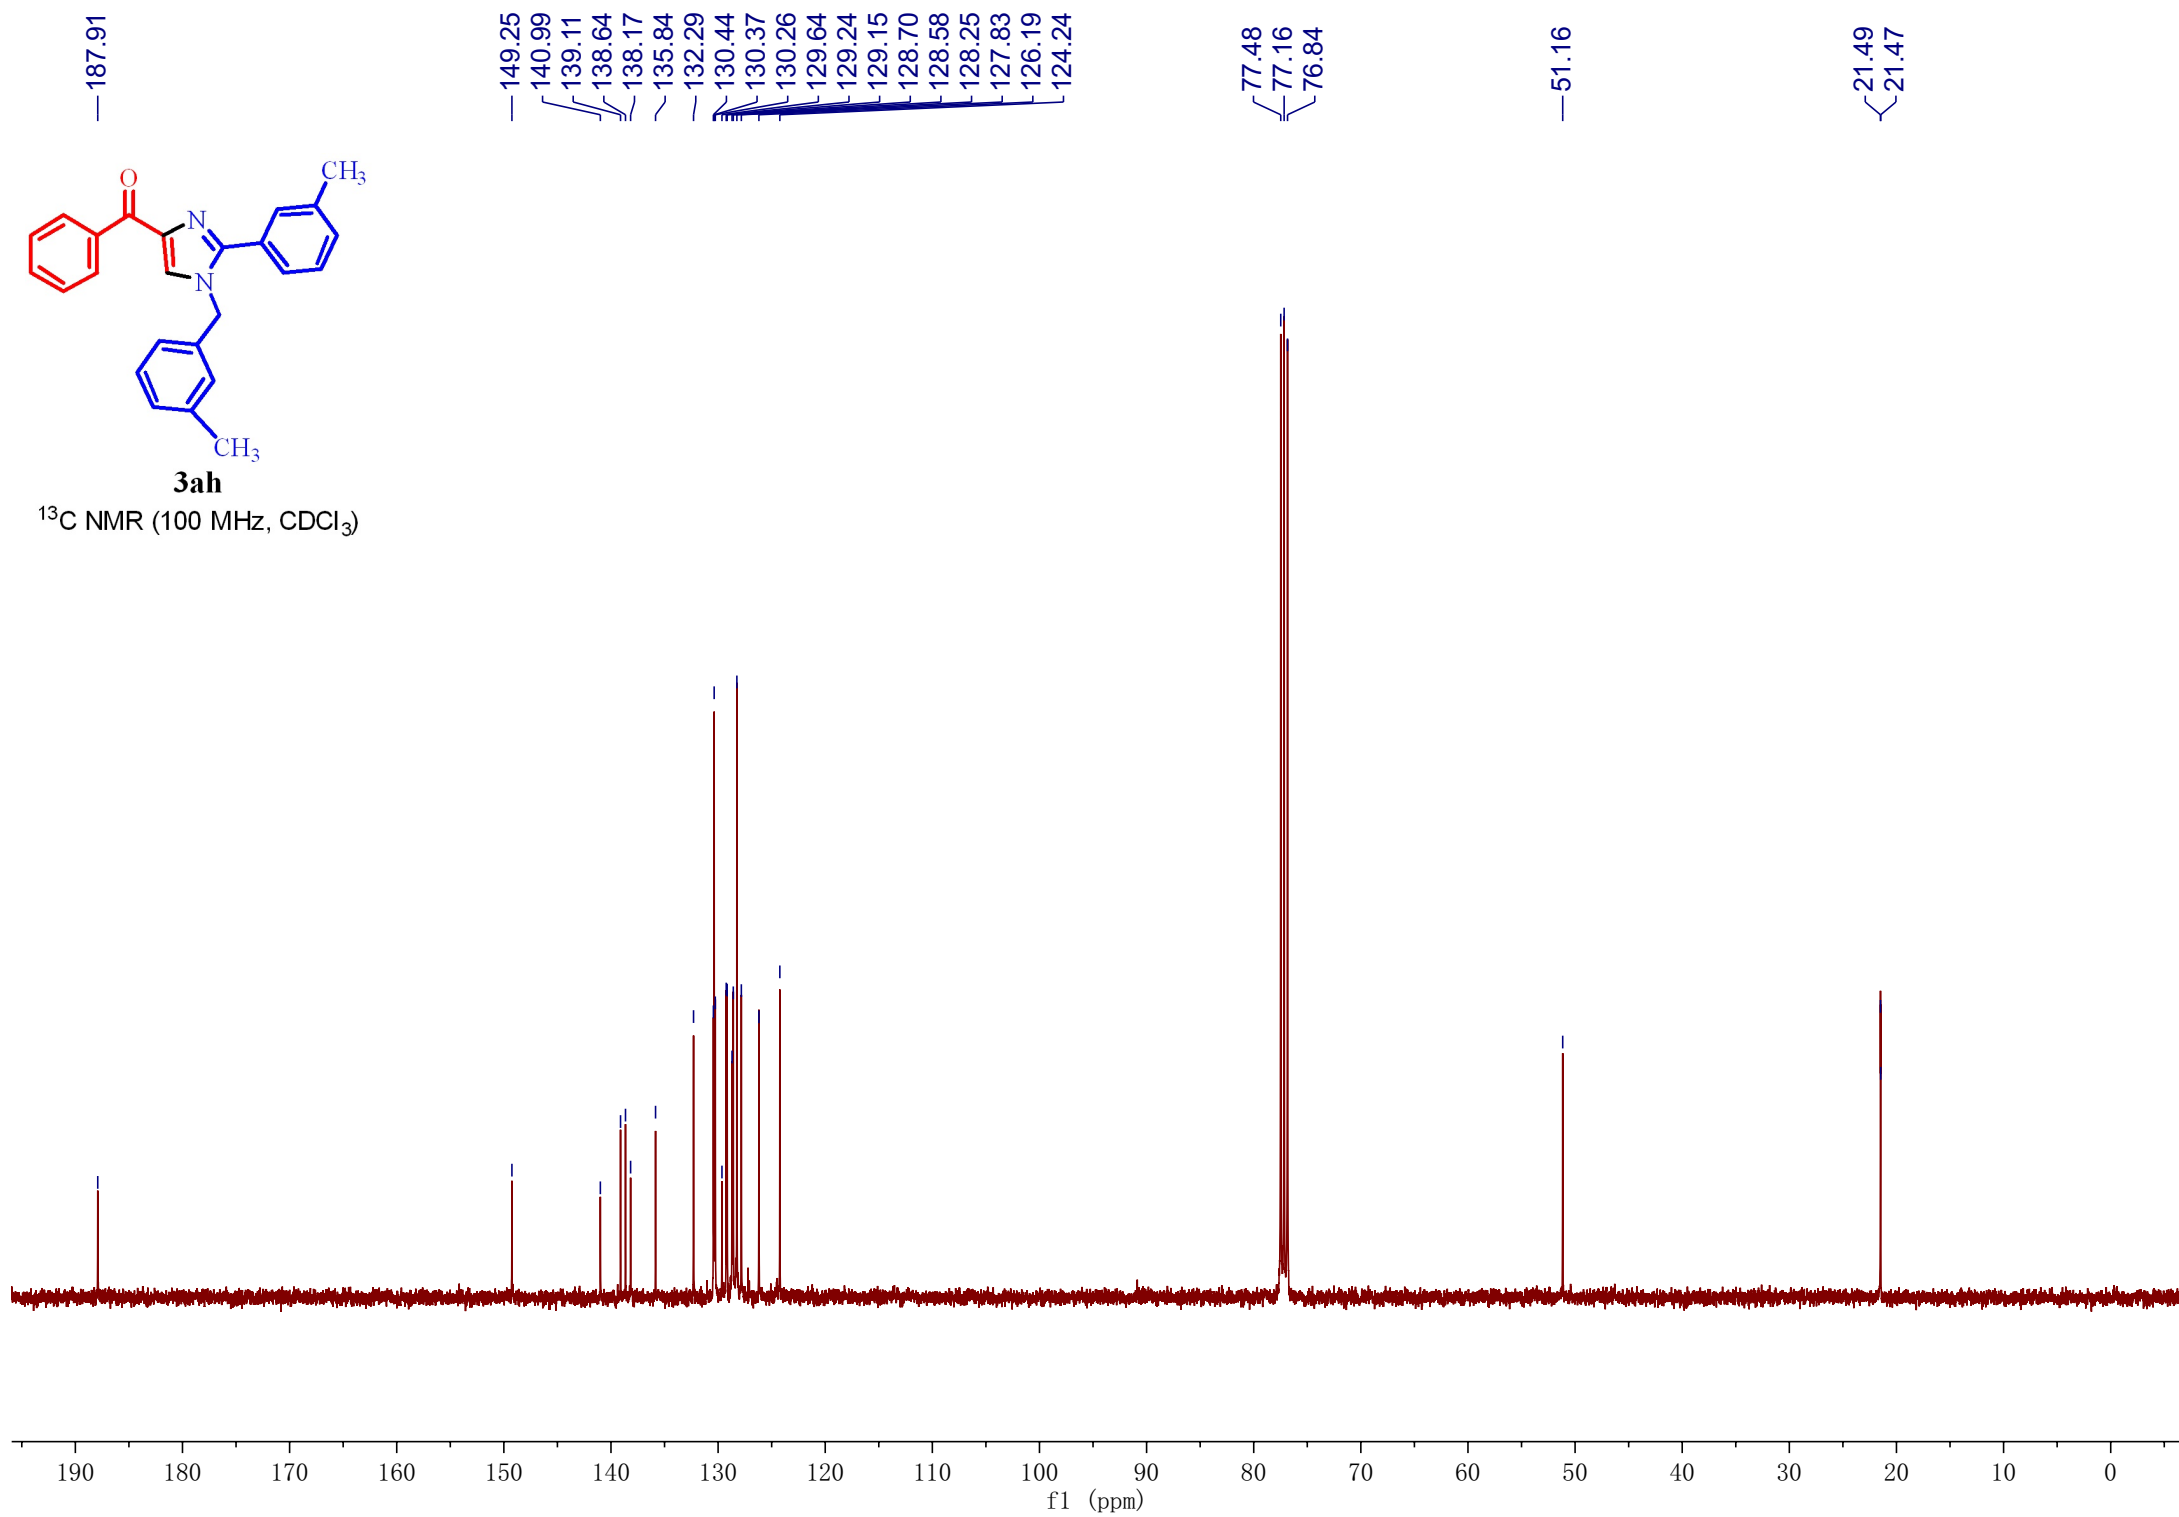



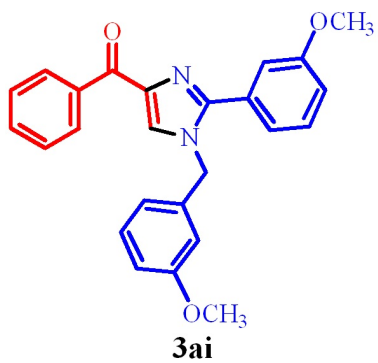

<sup>1</sup>H NMR (400 MHz, CDCl<sub>3</sub>)

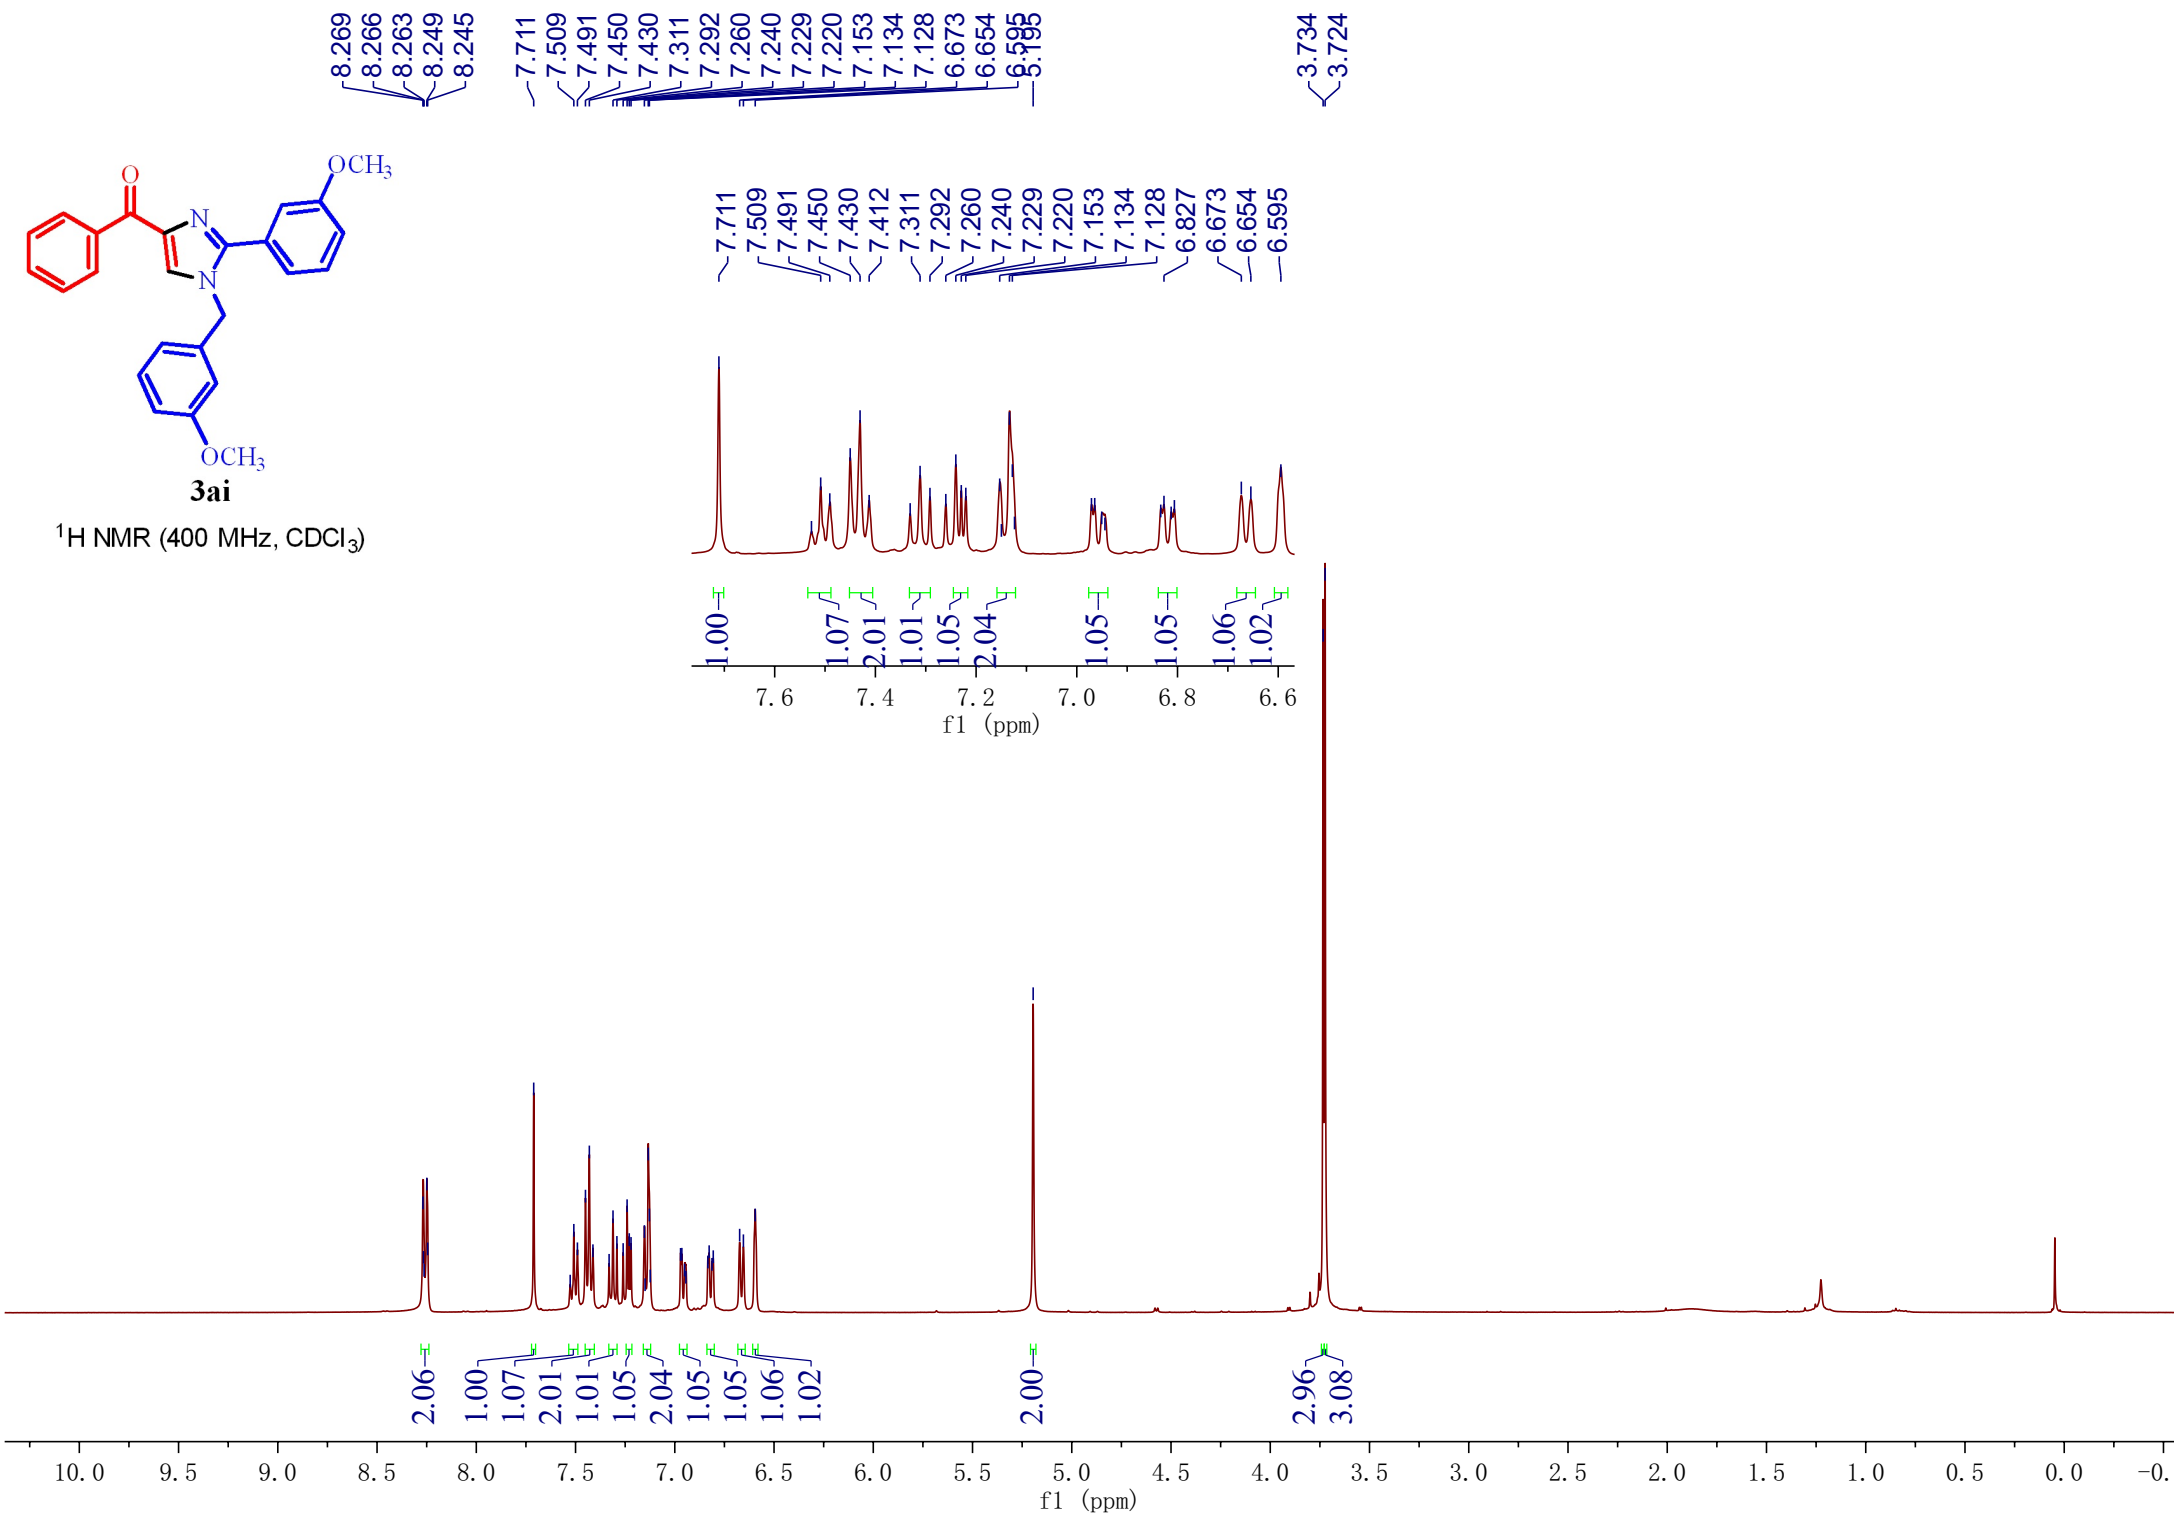

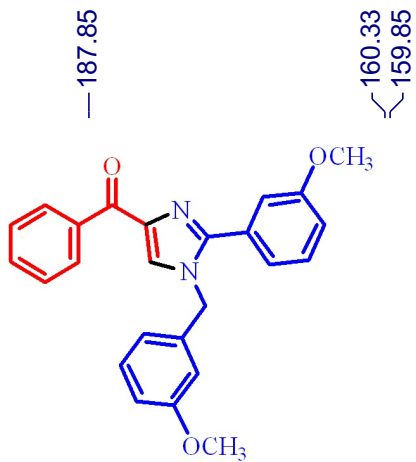

$^{13}\text{C}$  NMR (100 MHz,  $\text{CDCl}_3$ )

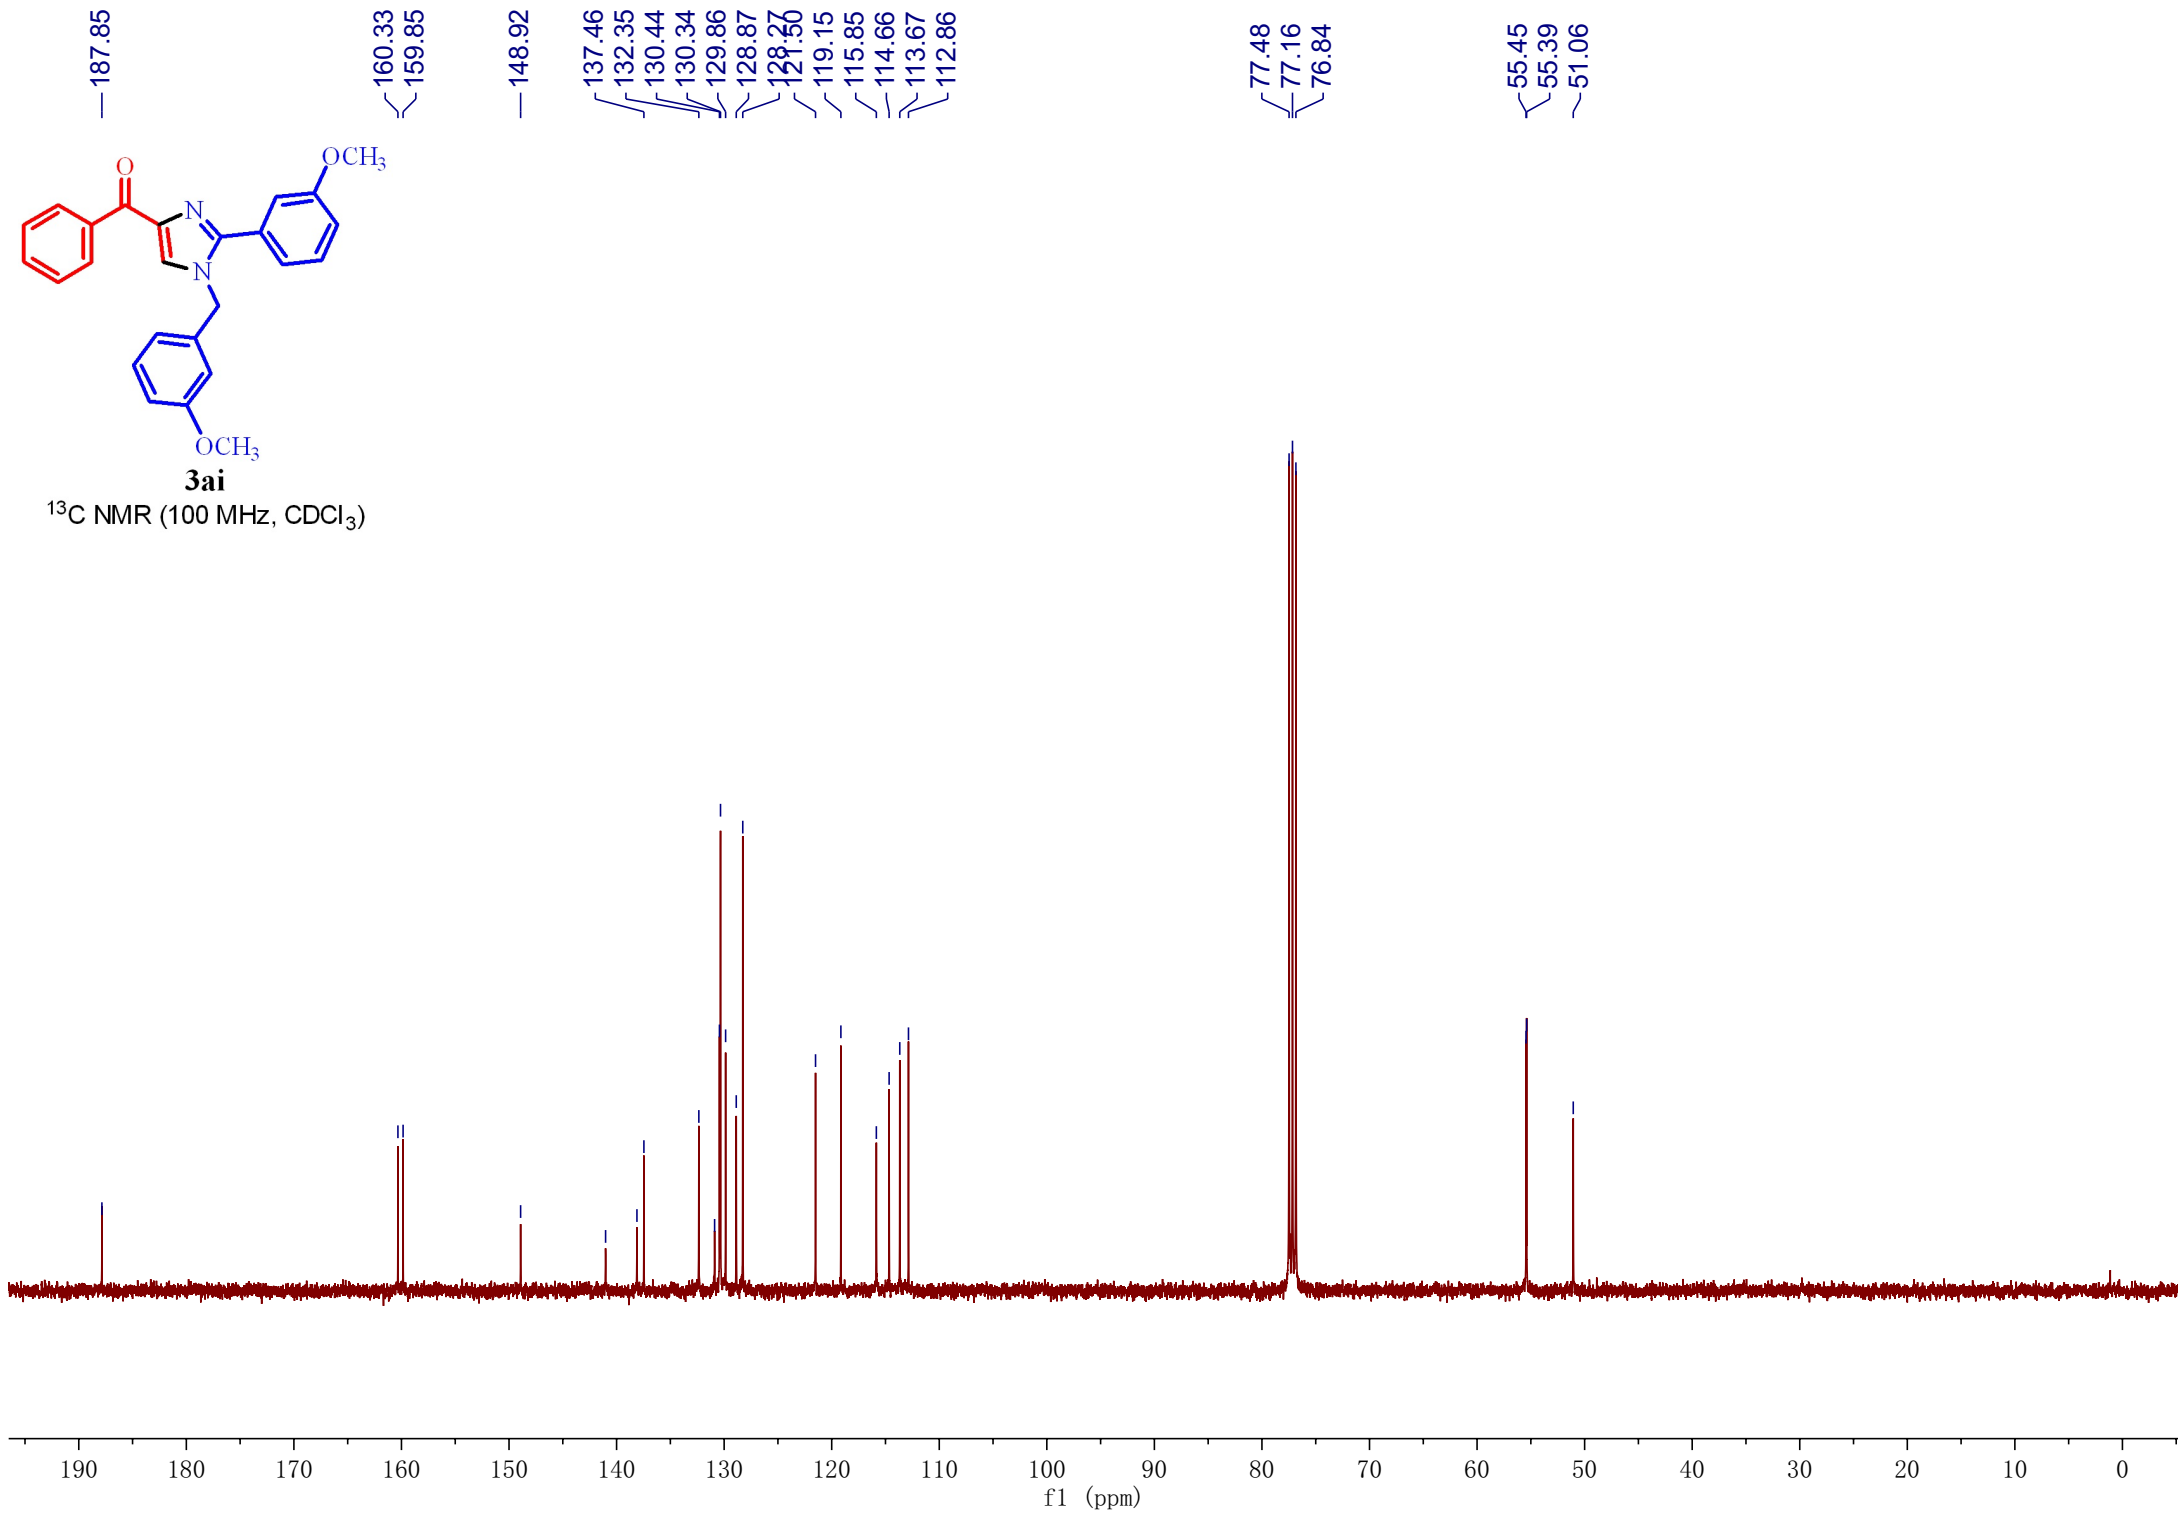

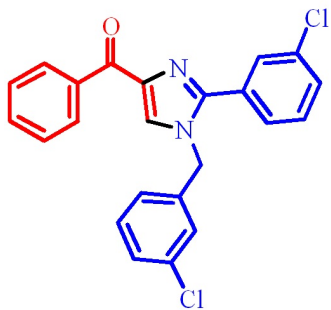

**3aj**

<sup>1</sup>H NMR (400 MHz, CDCl<sub>3</sub>)

8.311  
8.292  
7.764  
7.620  
7.561  
7.543  
7.501  
7.482  
7.463  
7.449  
7.432  
7.393  
7.376  
7.319  
7.302  
7.260  
7.097  
6.980  
6.963

7.764  
7.620  
7.579  
7.561  
7.543  
7.501  
7.482  
7.463  
7.449  
7.432  
7.427  
7.393  
7.376  
7.319  
7.302  
7.260  
7.097  
6.980  
6.963

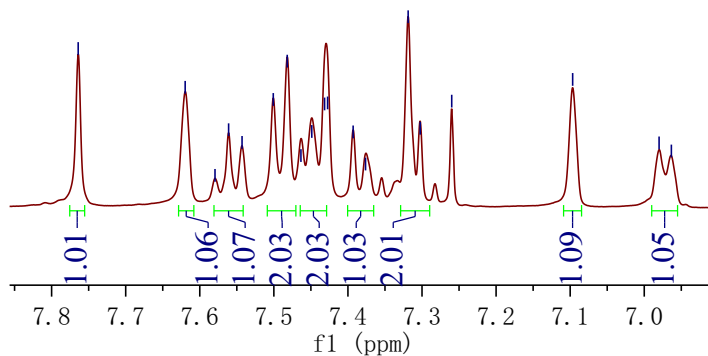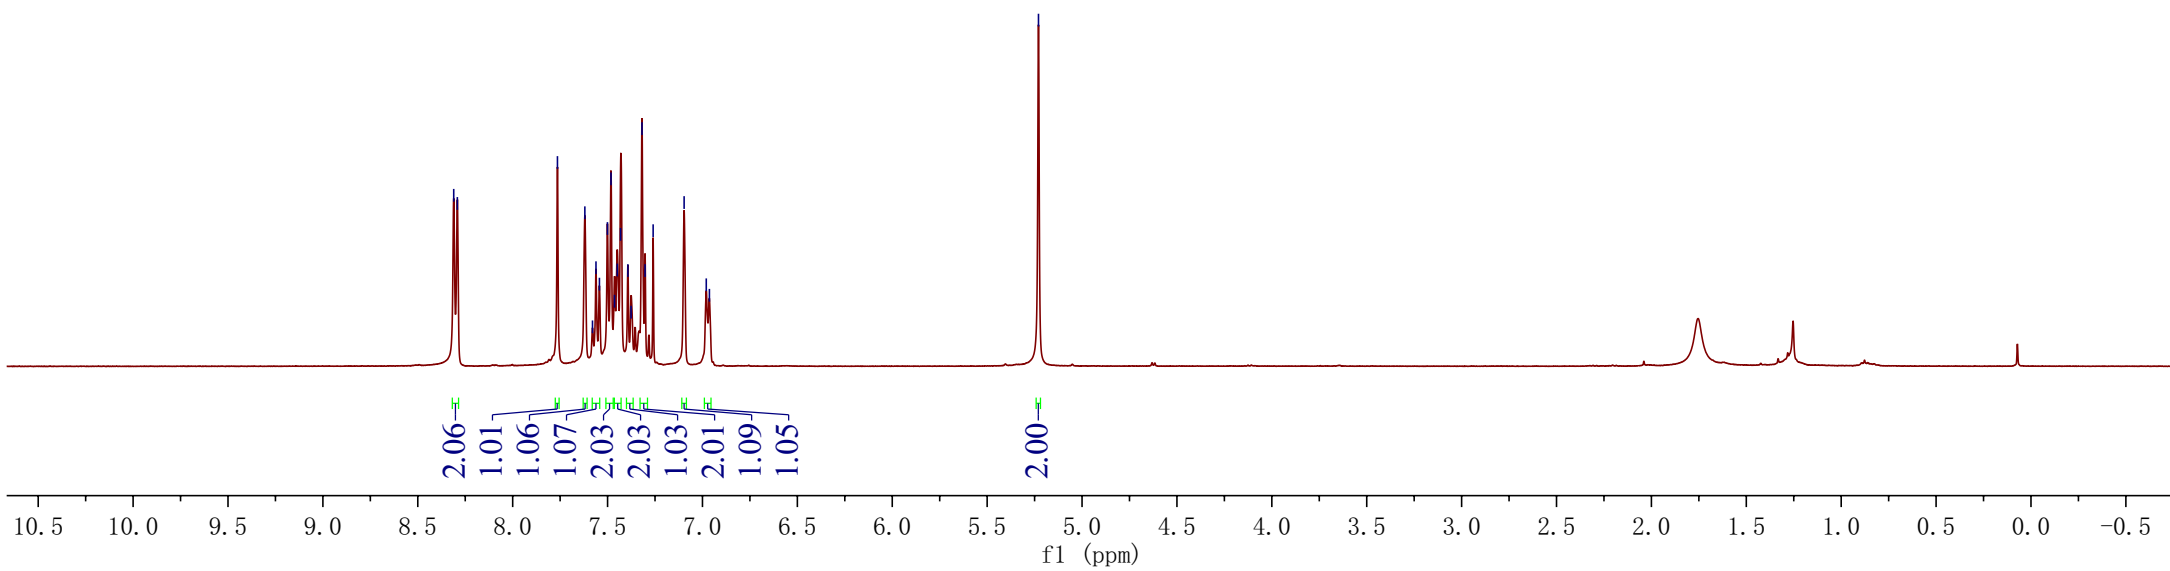

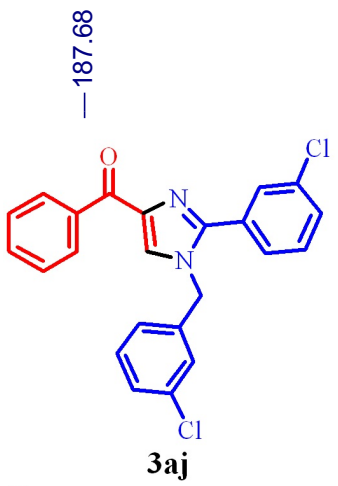

<sup>13</sup>C NMR (100 MHz, CDCl<sub>3</sub>)

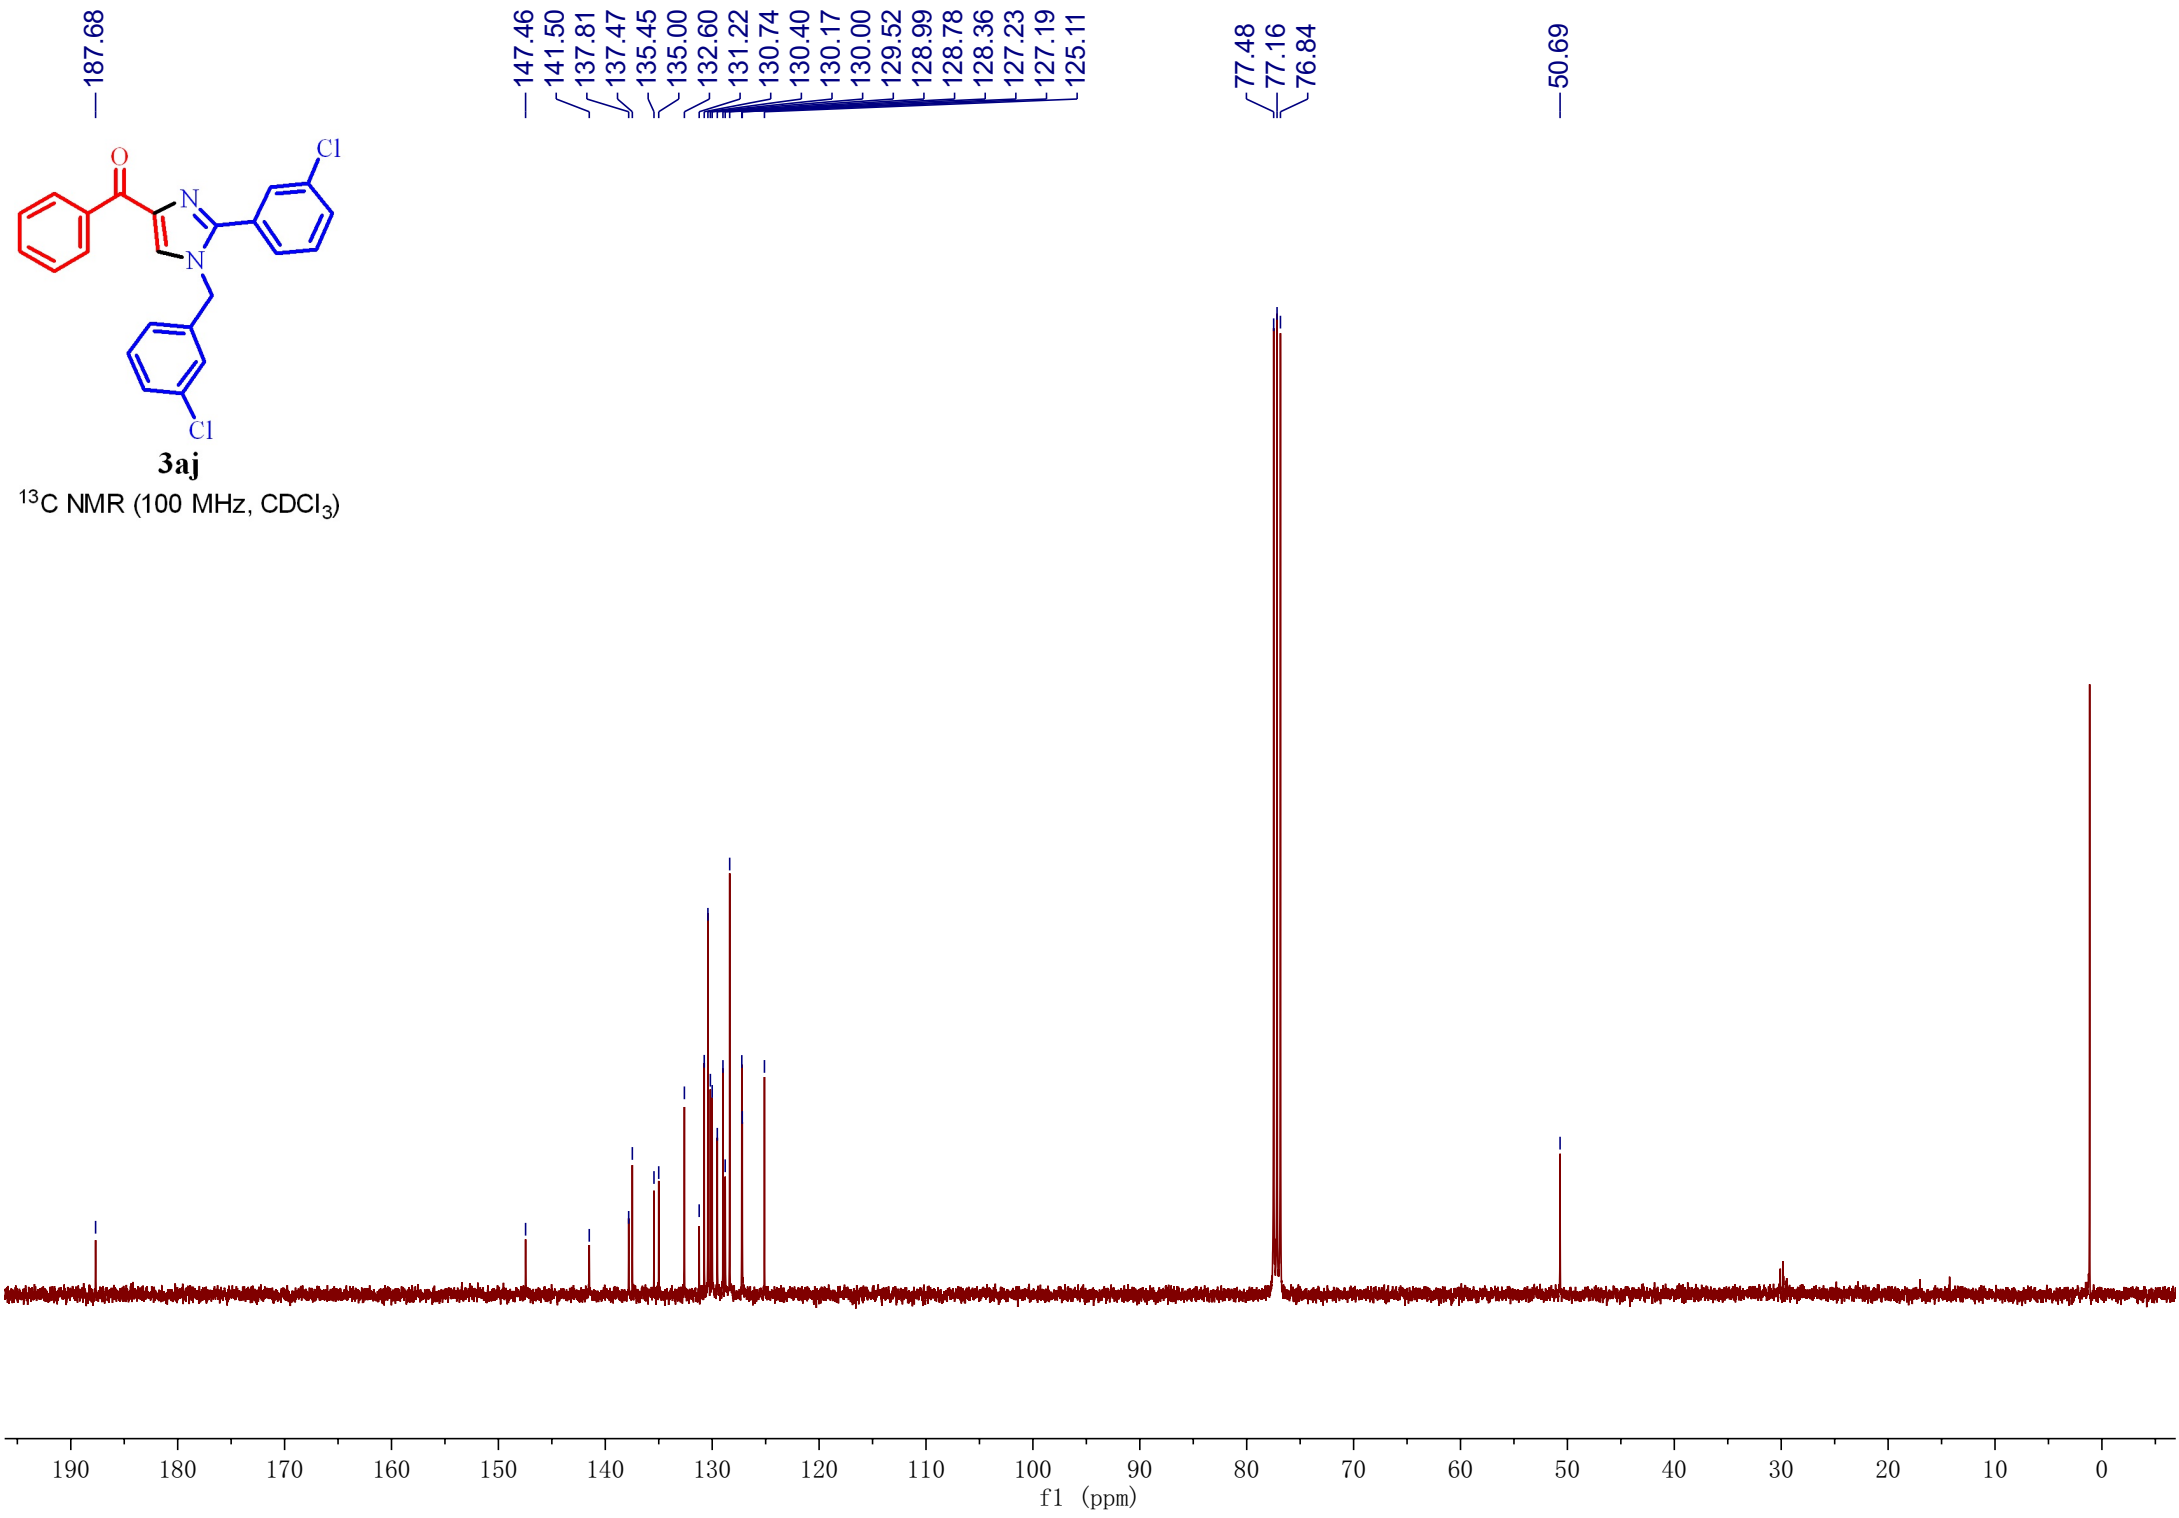

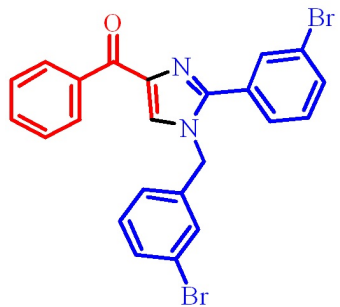

**3ak**

<sup>1</sup>H NMR (400 MHz, CDCl<sub>3</sub>)

8.305  
8.289  
8.285  
8.282  
7.760  
7.584  
7.580  
7.560  
7.500  
7.486  
7.481  
7.468  
7.464  
7.330  
7.311  
7.260  
7.254  
7.243  
7.240  
7.093  
7.003

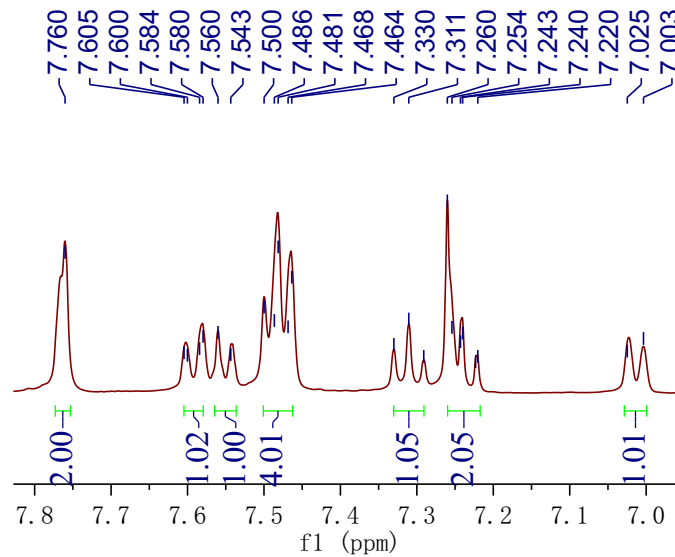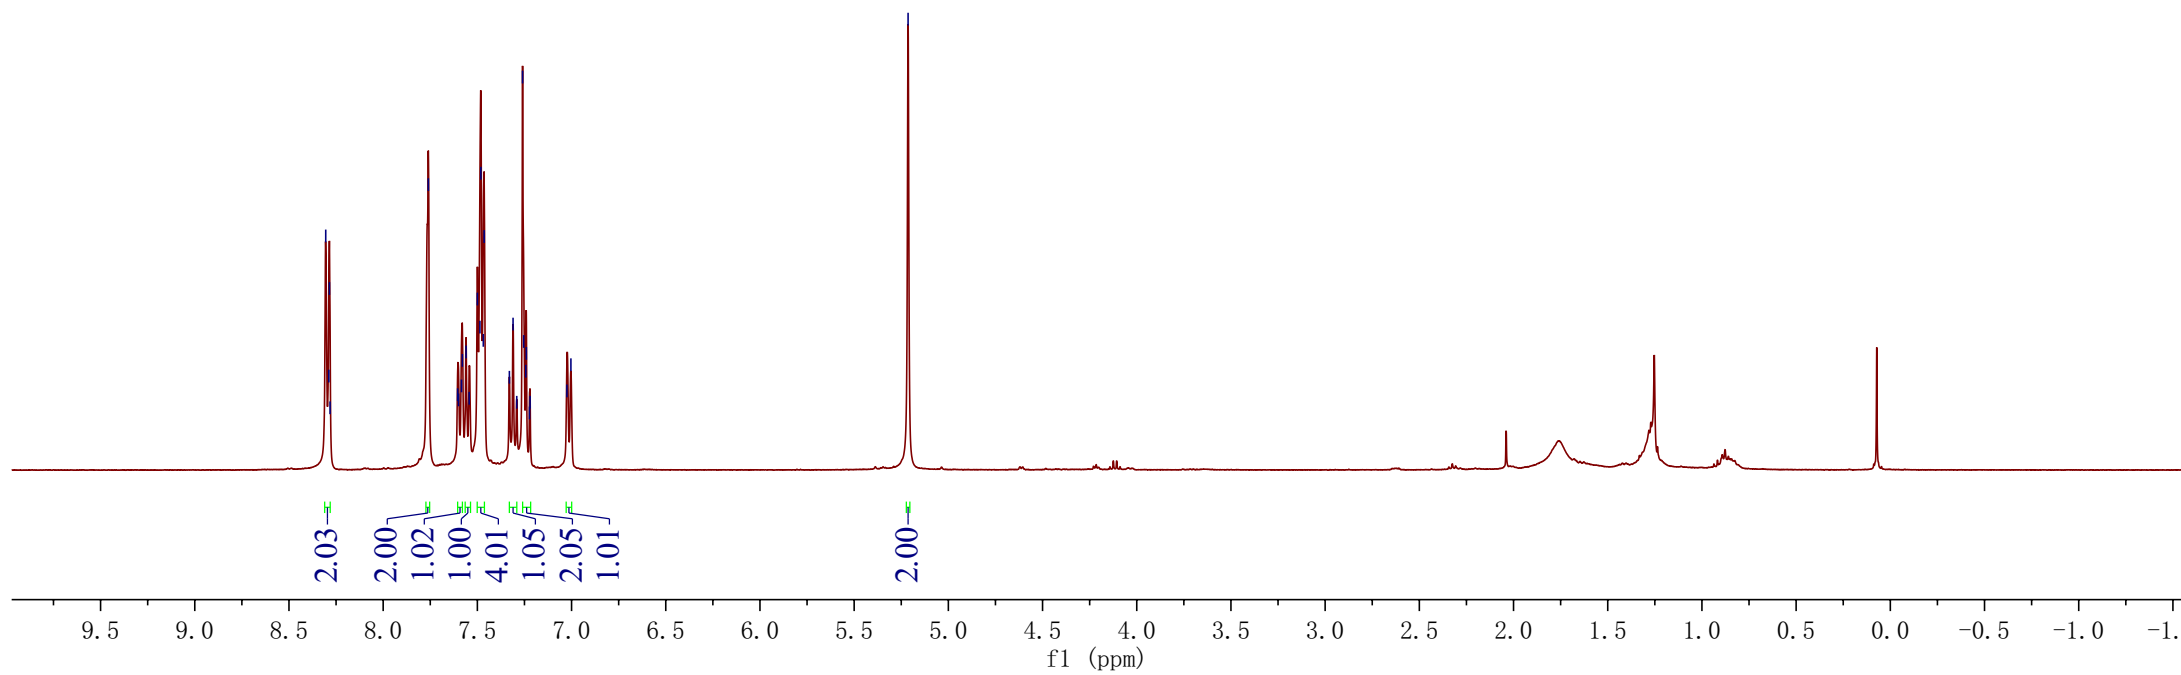

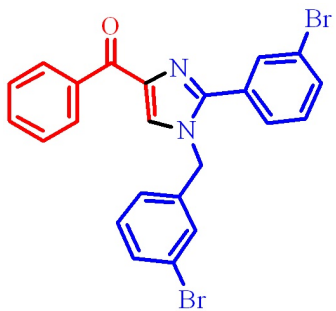

**3ak**

$^{13}\text{C}$  NMR (100 MHz,  $\text{CDCl}_3$ )

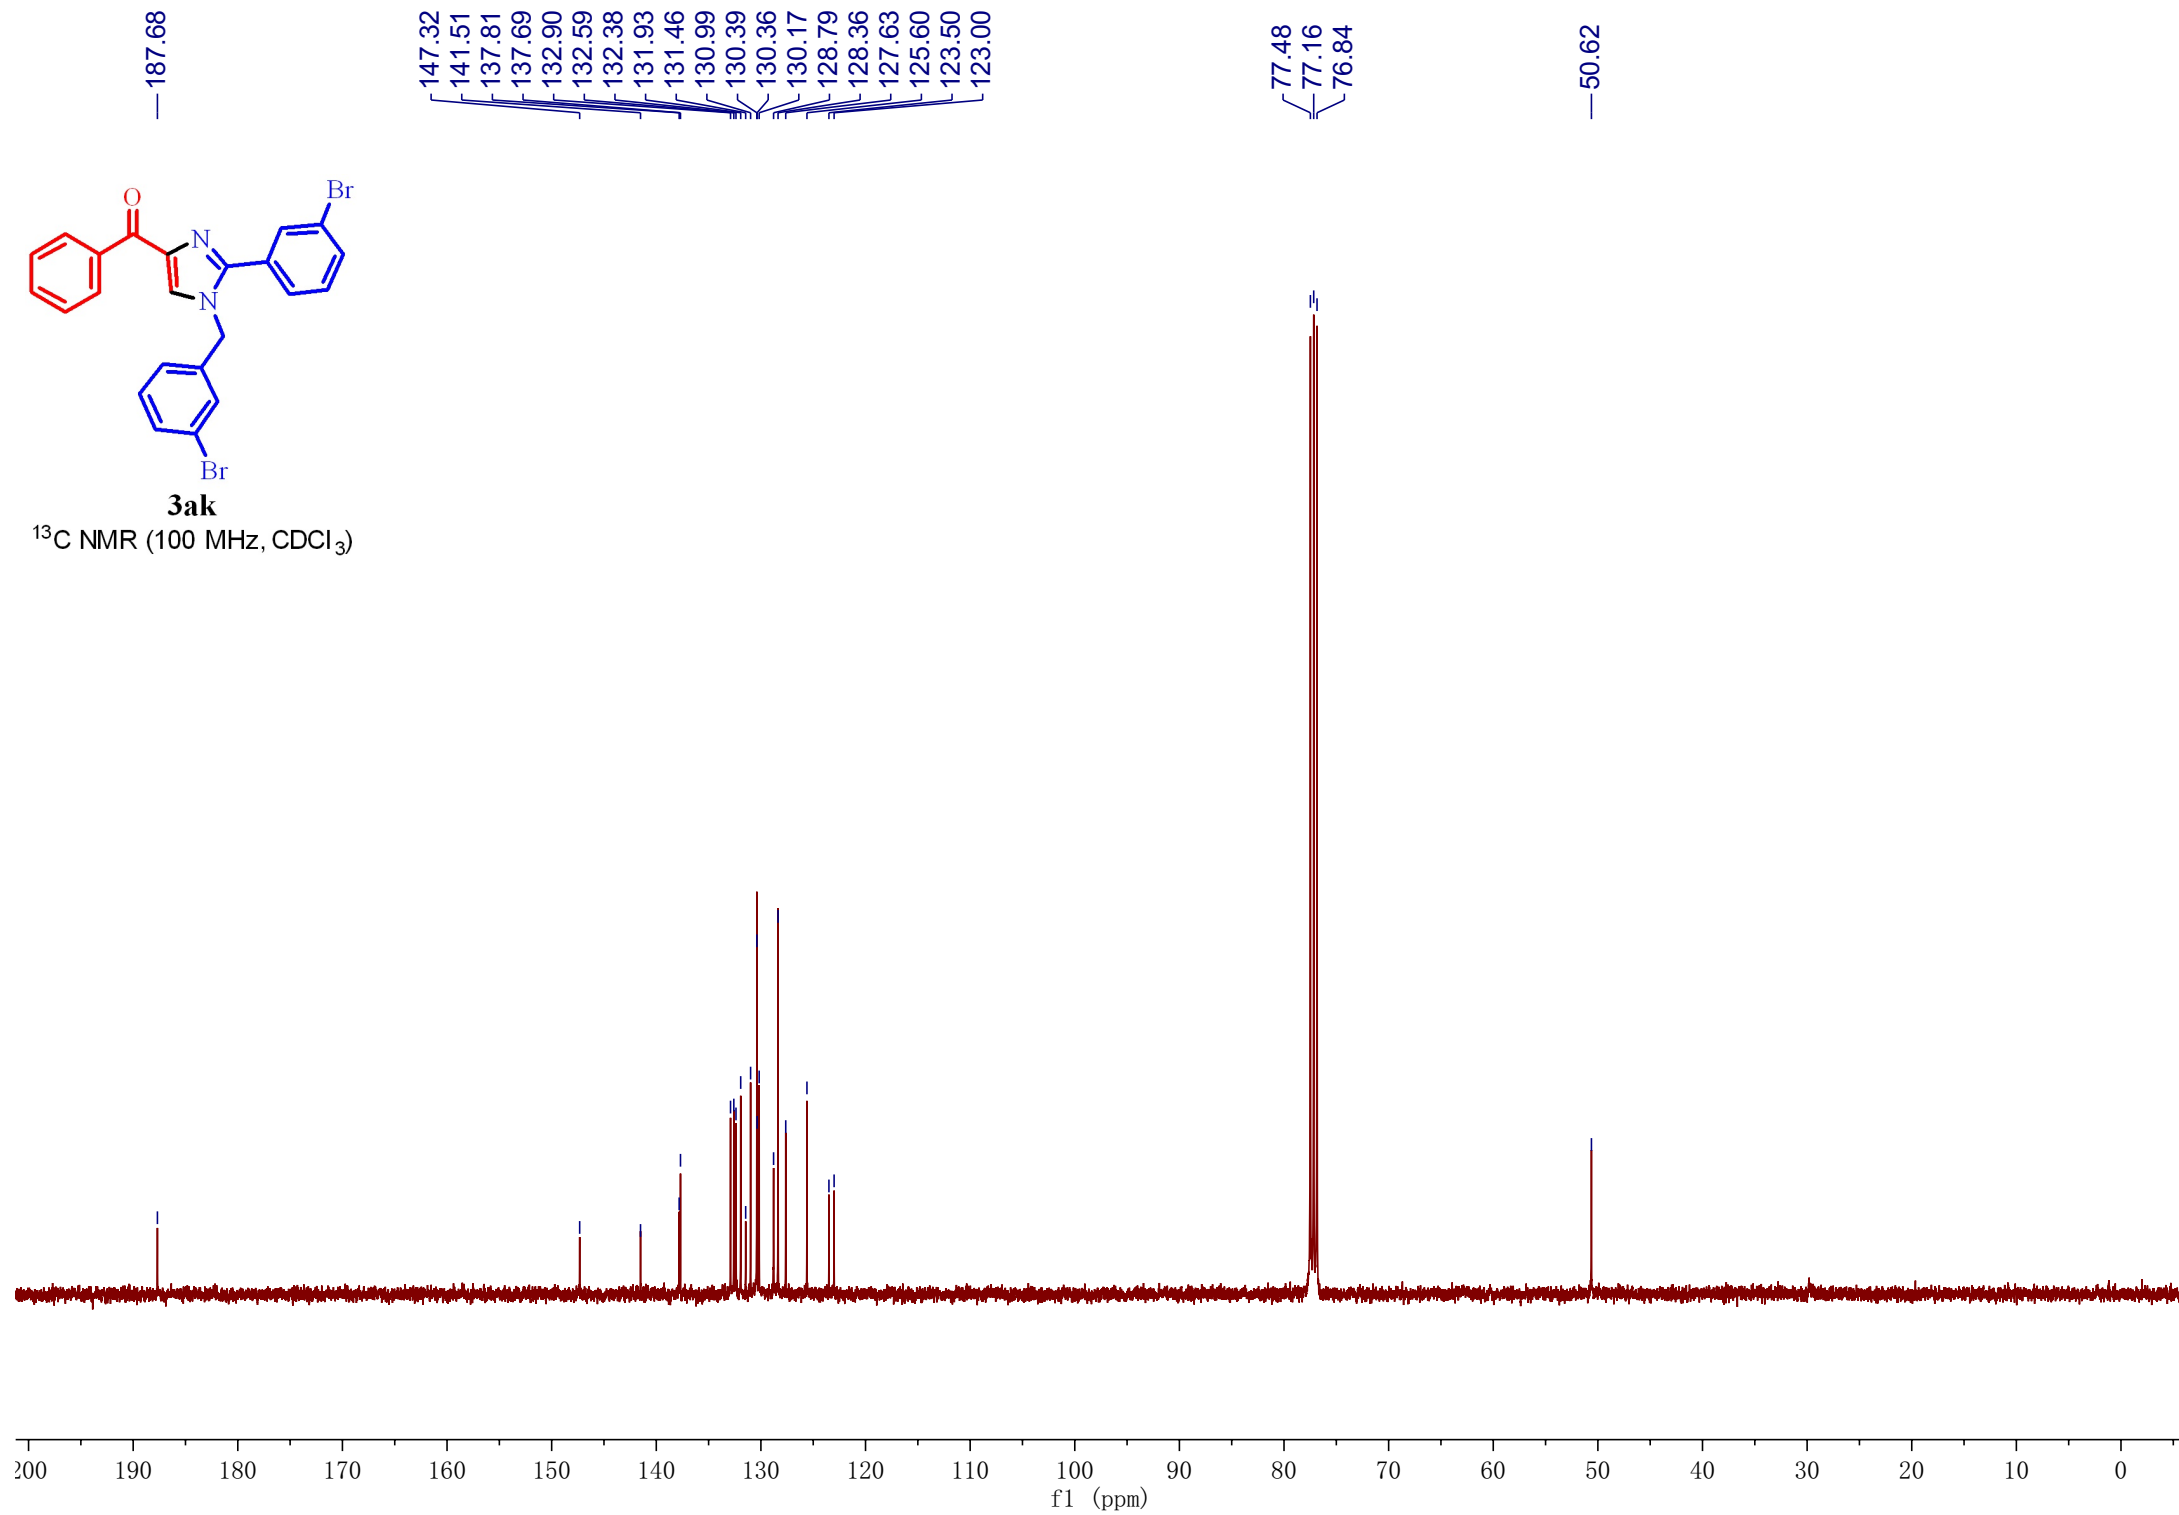

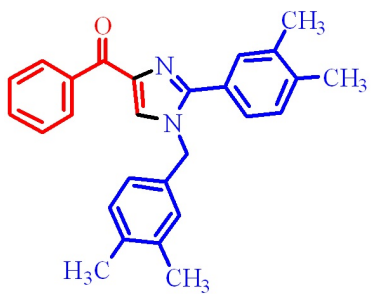

**3al**

<sup>1</sup>H NMR (400 MHz, CDCl<sub>3</sub>)

8.294  
8.276  
7.691  
7.545  
7.530  
7.512  
7.474  
7.457  
7.436  
7.336  
7.317  
7.260  
7.203  
7.183  
7.121  
7.102  
6.893  
6.872  
6.852

-5.161

2.310  
2.294  
2.252  
2.232

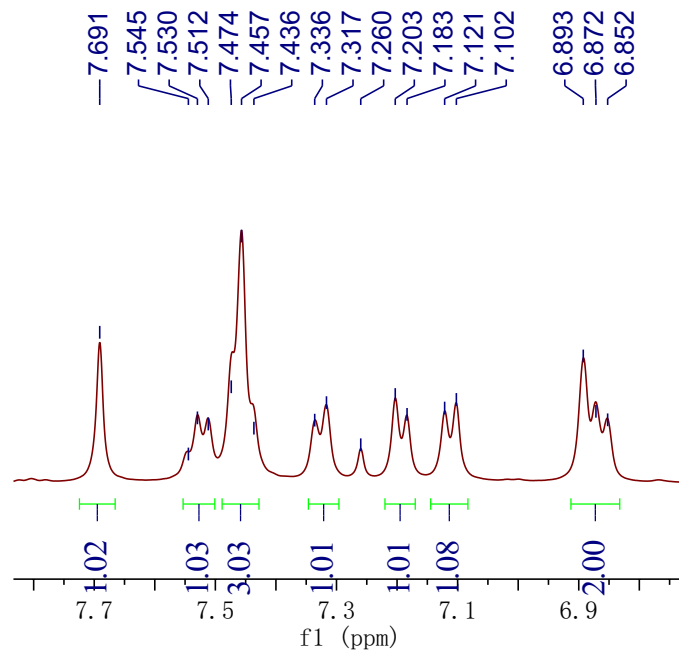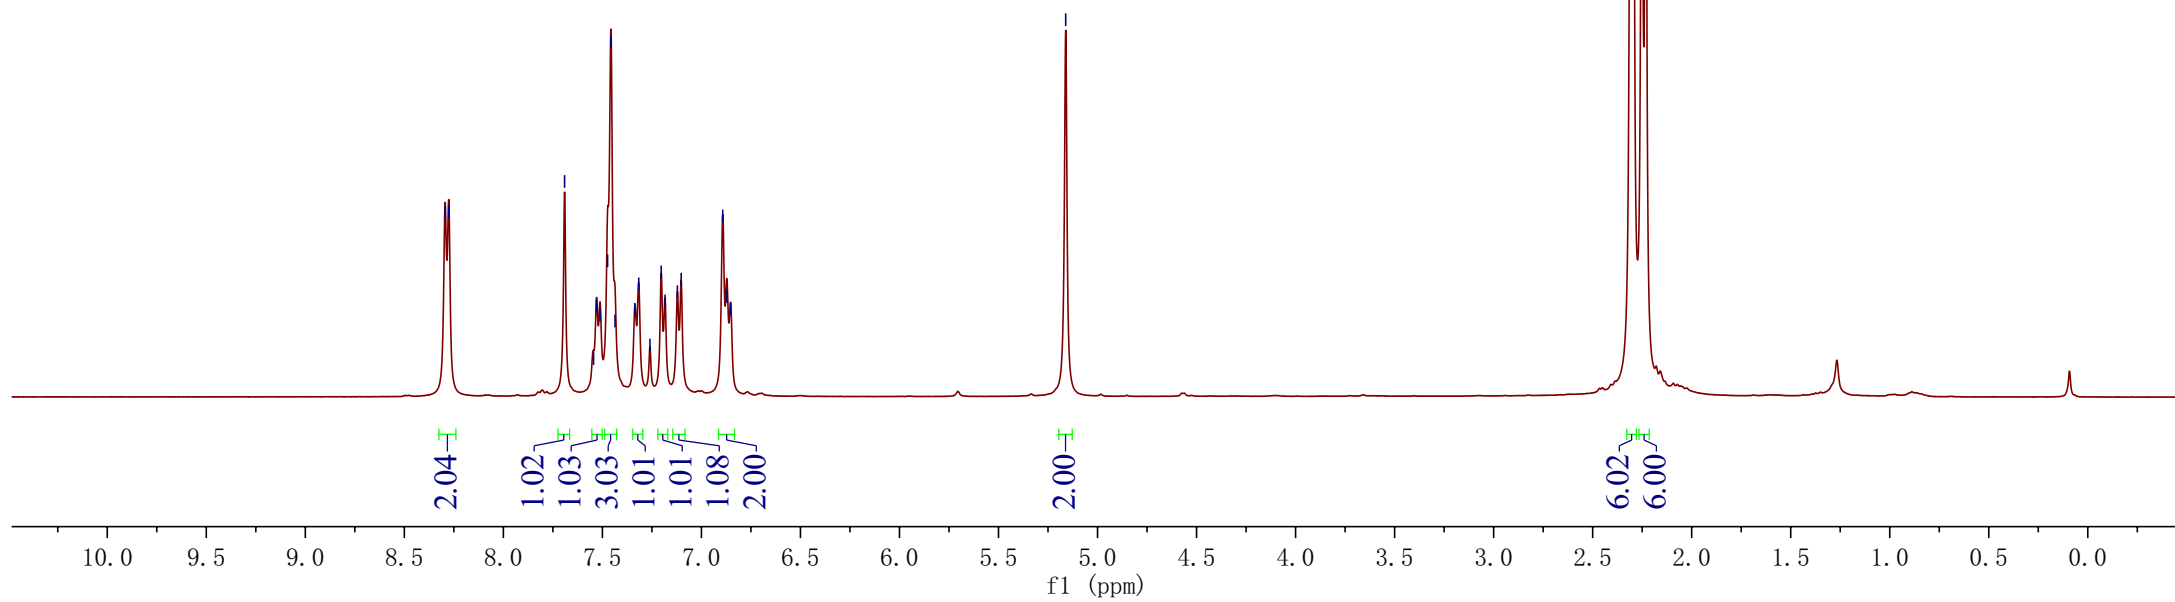

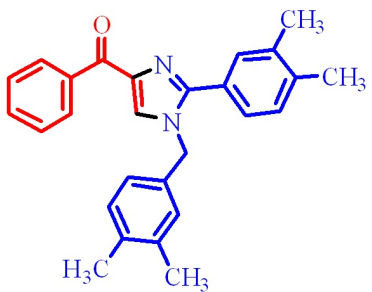

**3al**

$^{13}\text{C}$  NMR (100 MHz,  $\text{CDCl}_3$ )

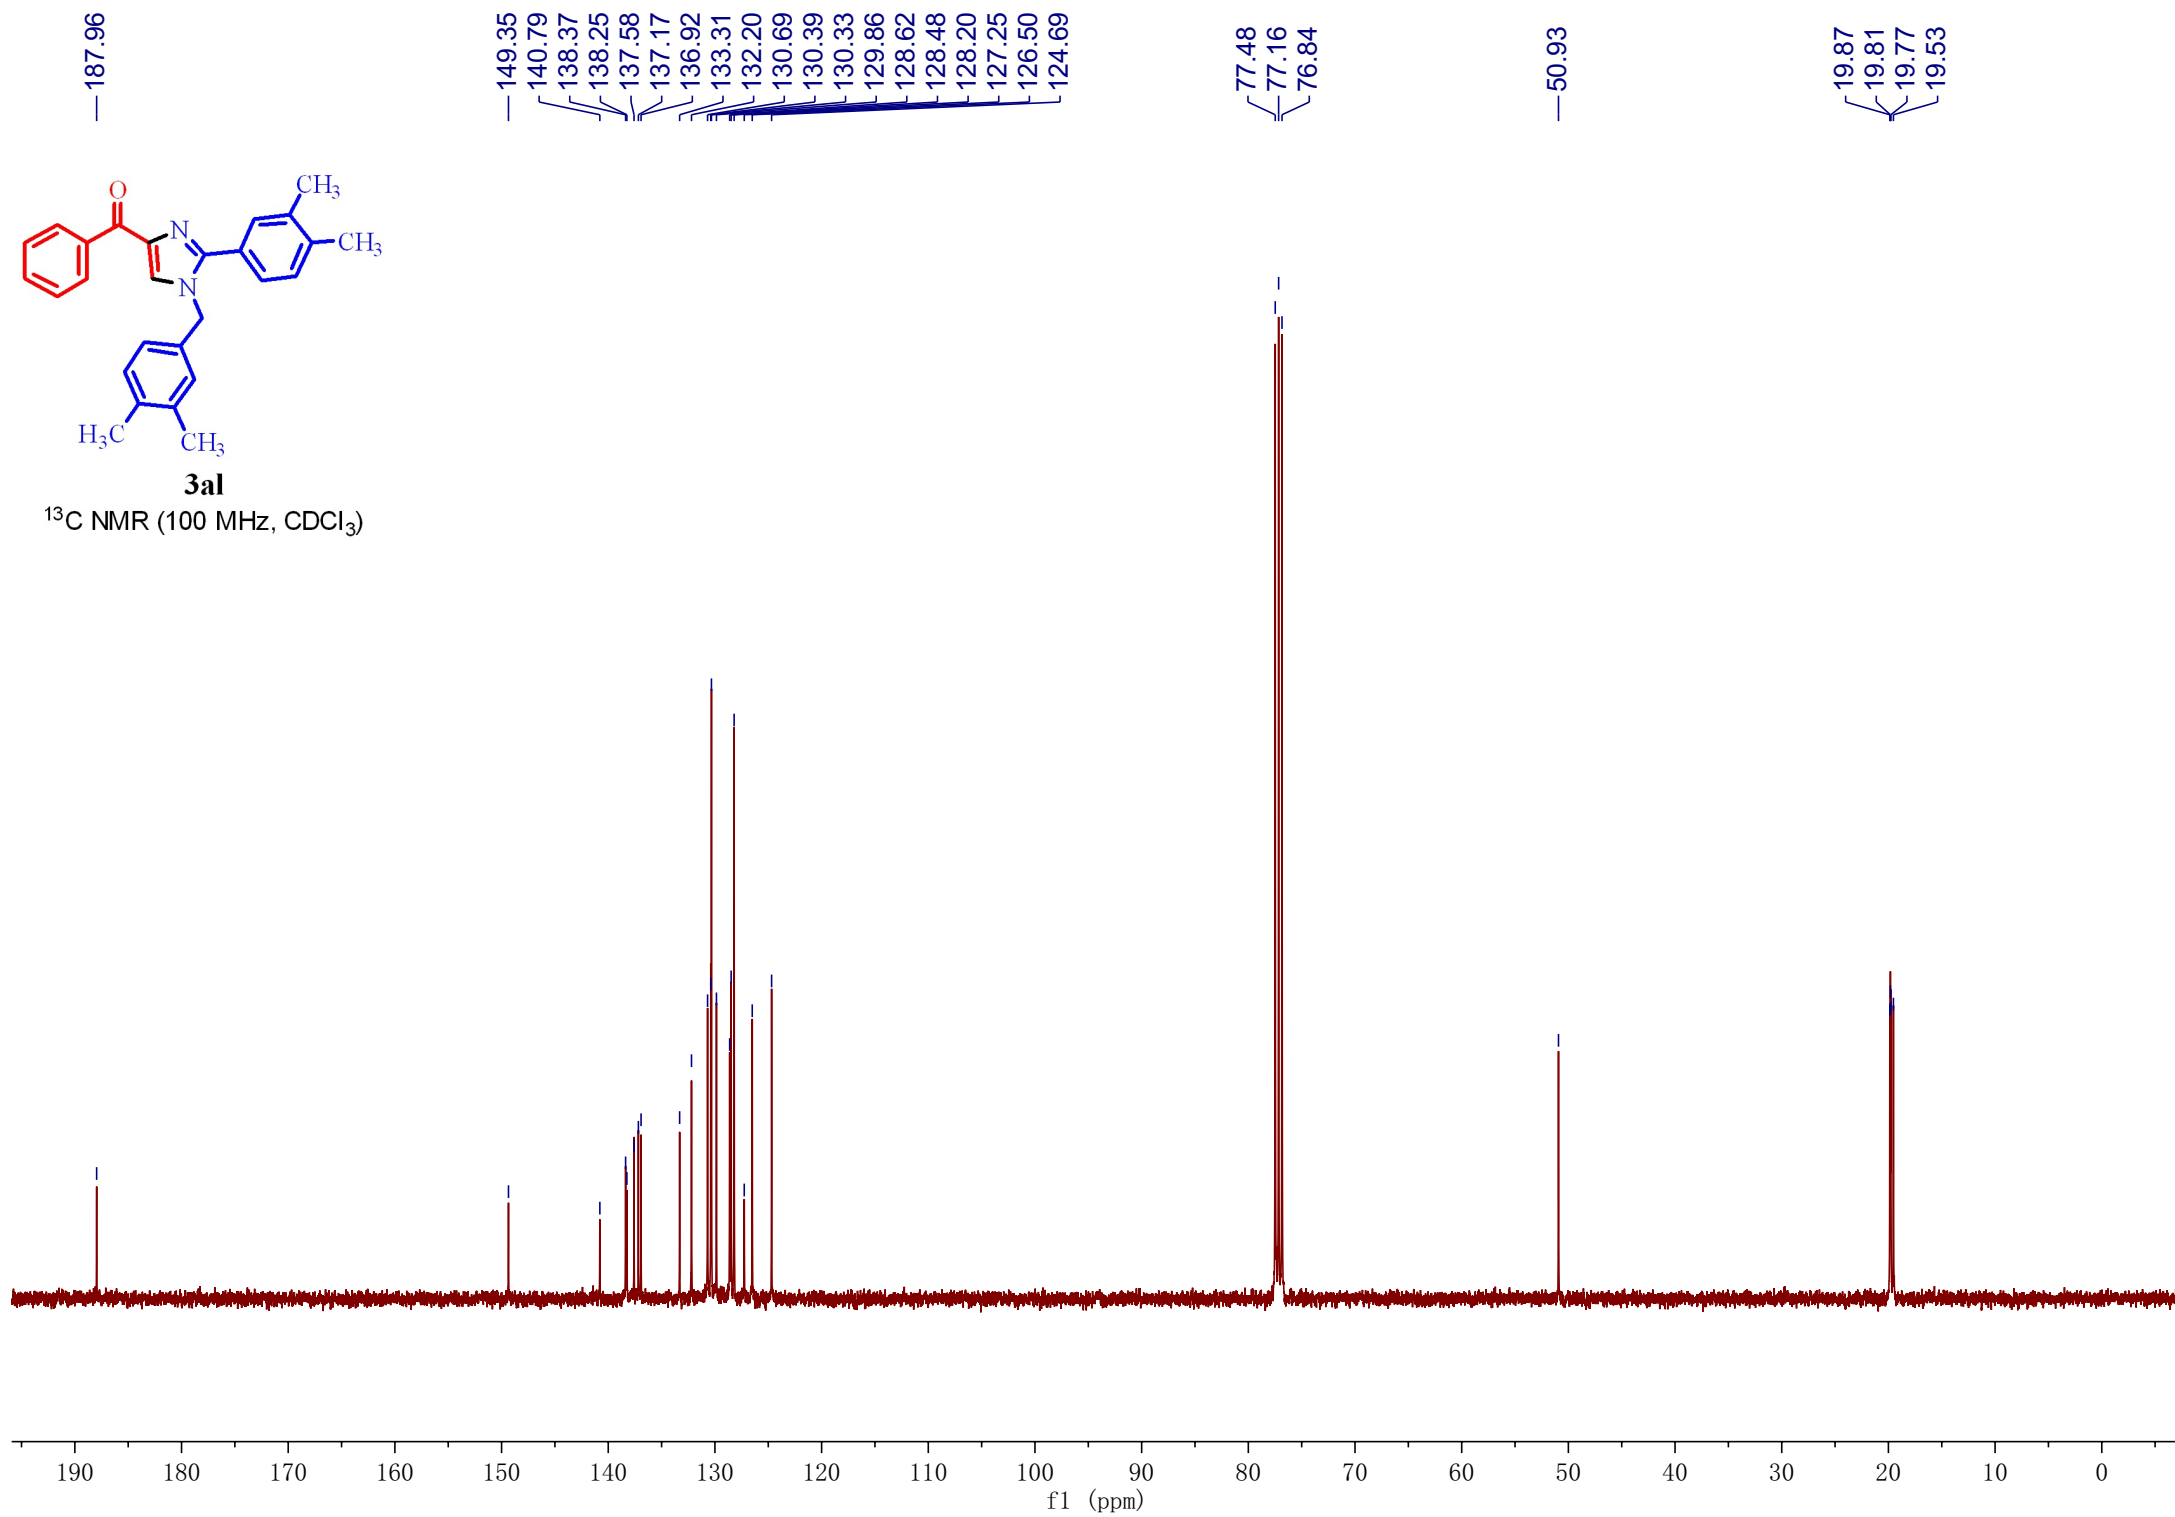



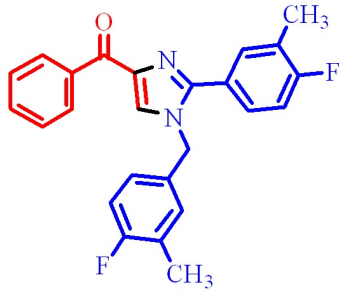

**3am**

<sup>1</sup>H NMR (400 MHz, CDCl<sub>3</sub>)

8.273  
8.270  
8.266  
8.258  
8.253  
8.249  
7.700  
7.540  
7.522  
7.479  
7.463  
7.460  
7.450  
7.445  
7.442  
7.335  
7.260  
7.079  
7.056  
7.034  
6.997  
6.976  
6.953  
6.911  
6.893  
6.893

2.295  
2.290  
2.238  
2.233

7.700  
7.540  
7.522  
7.479  
7.468  
7.463  
7.460  
7.450  
7.445  
7.442  
7.335  
7.260  
7.079  
7.056  
7.034  
6.997  
6.976  
6.953  
6.917  
6.911  
6.893

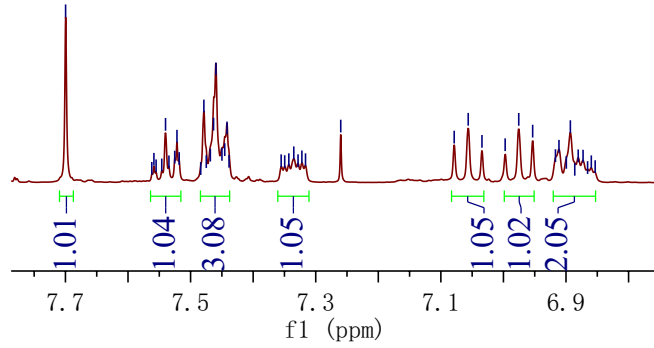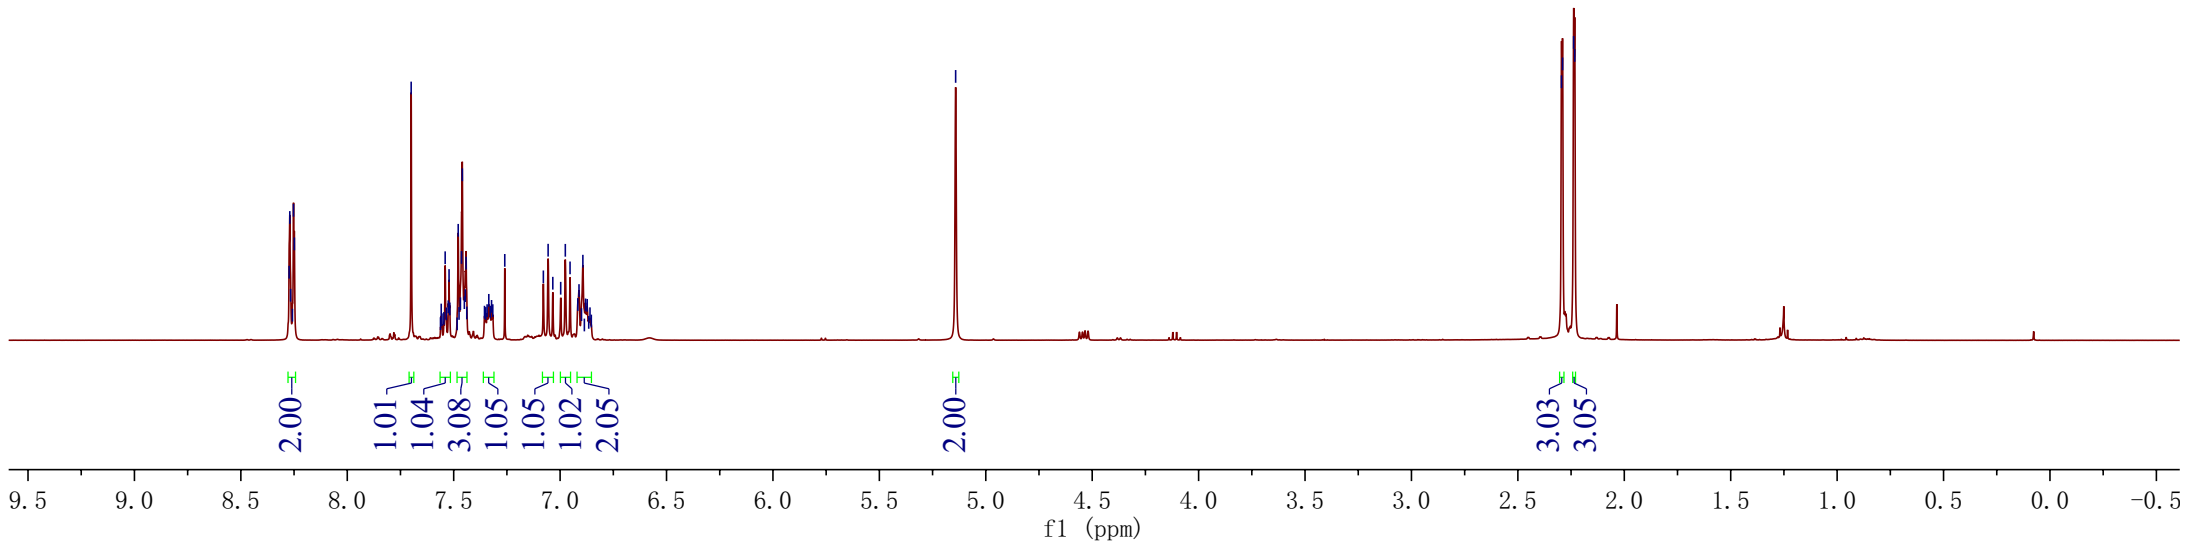

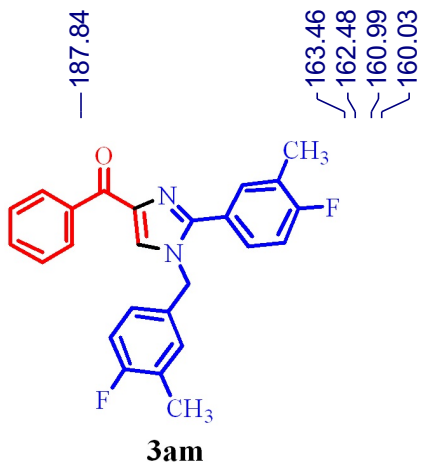

<sup>13</sup>C NMR (100 MHz, CDCl<sub>3</sub>)

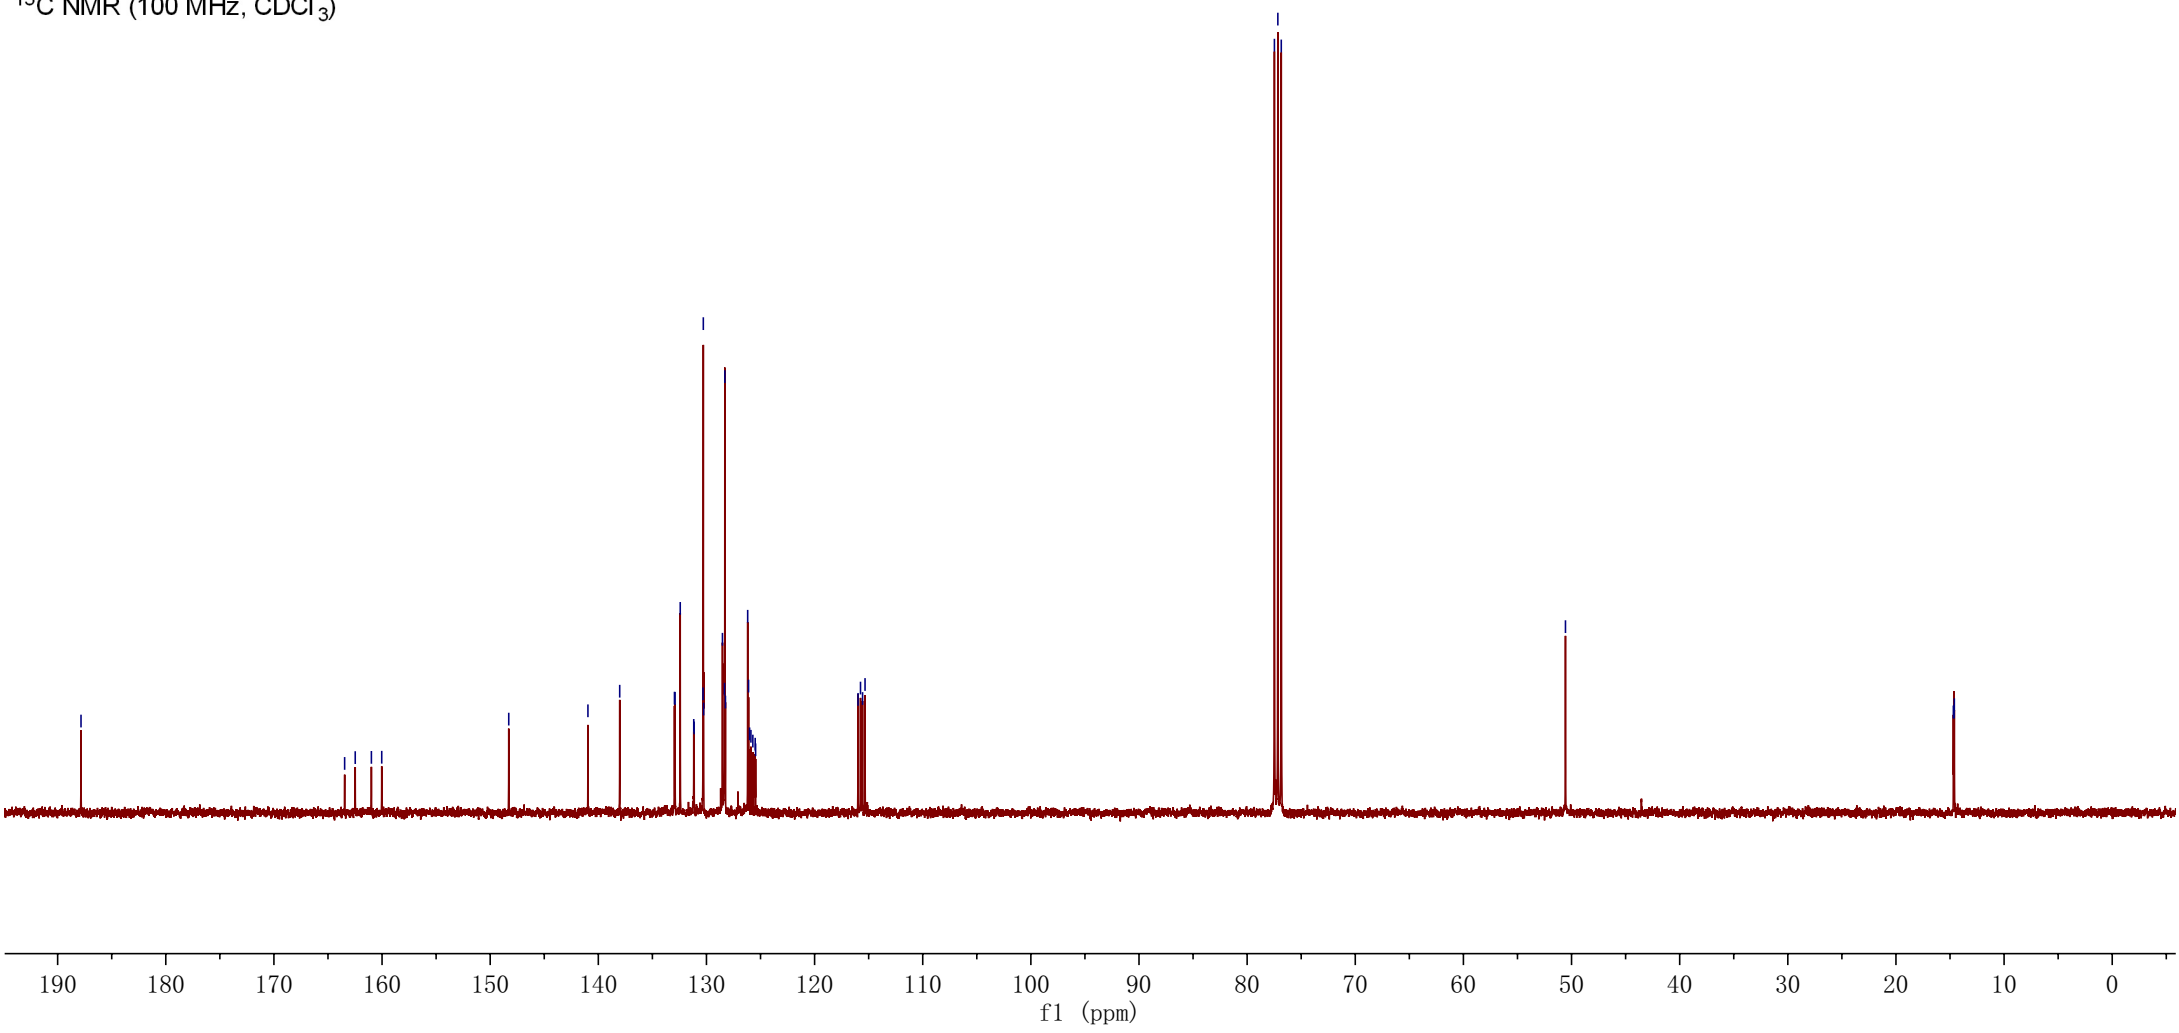

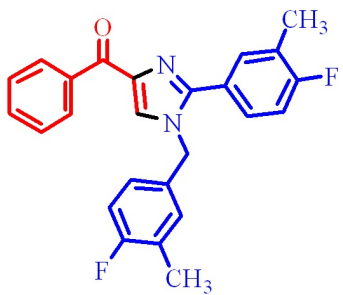

**3am**

$^{19}\text{F}$  NMR (376 MHz,  $\text{CDCl}_3$ )

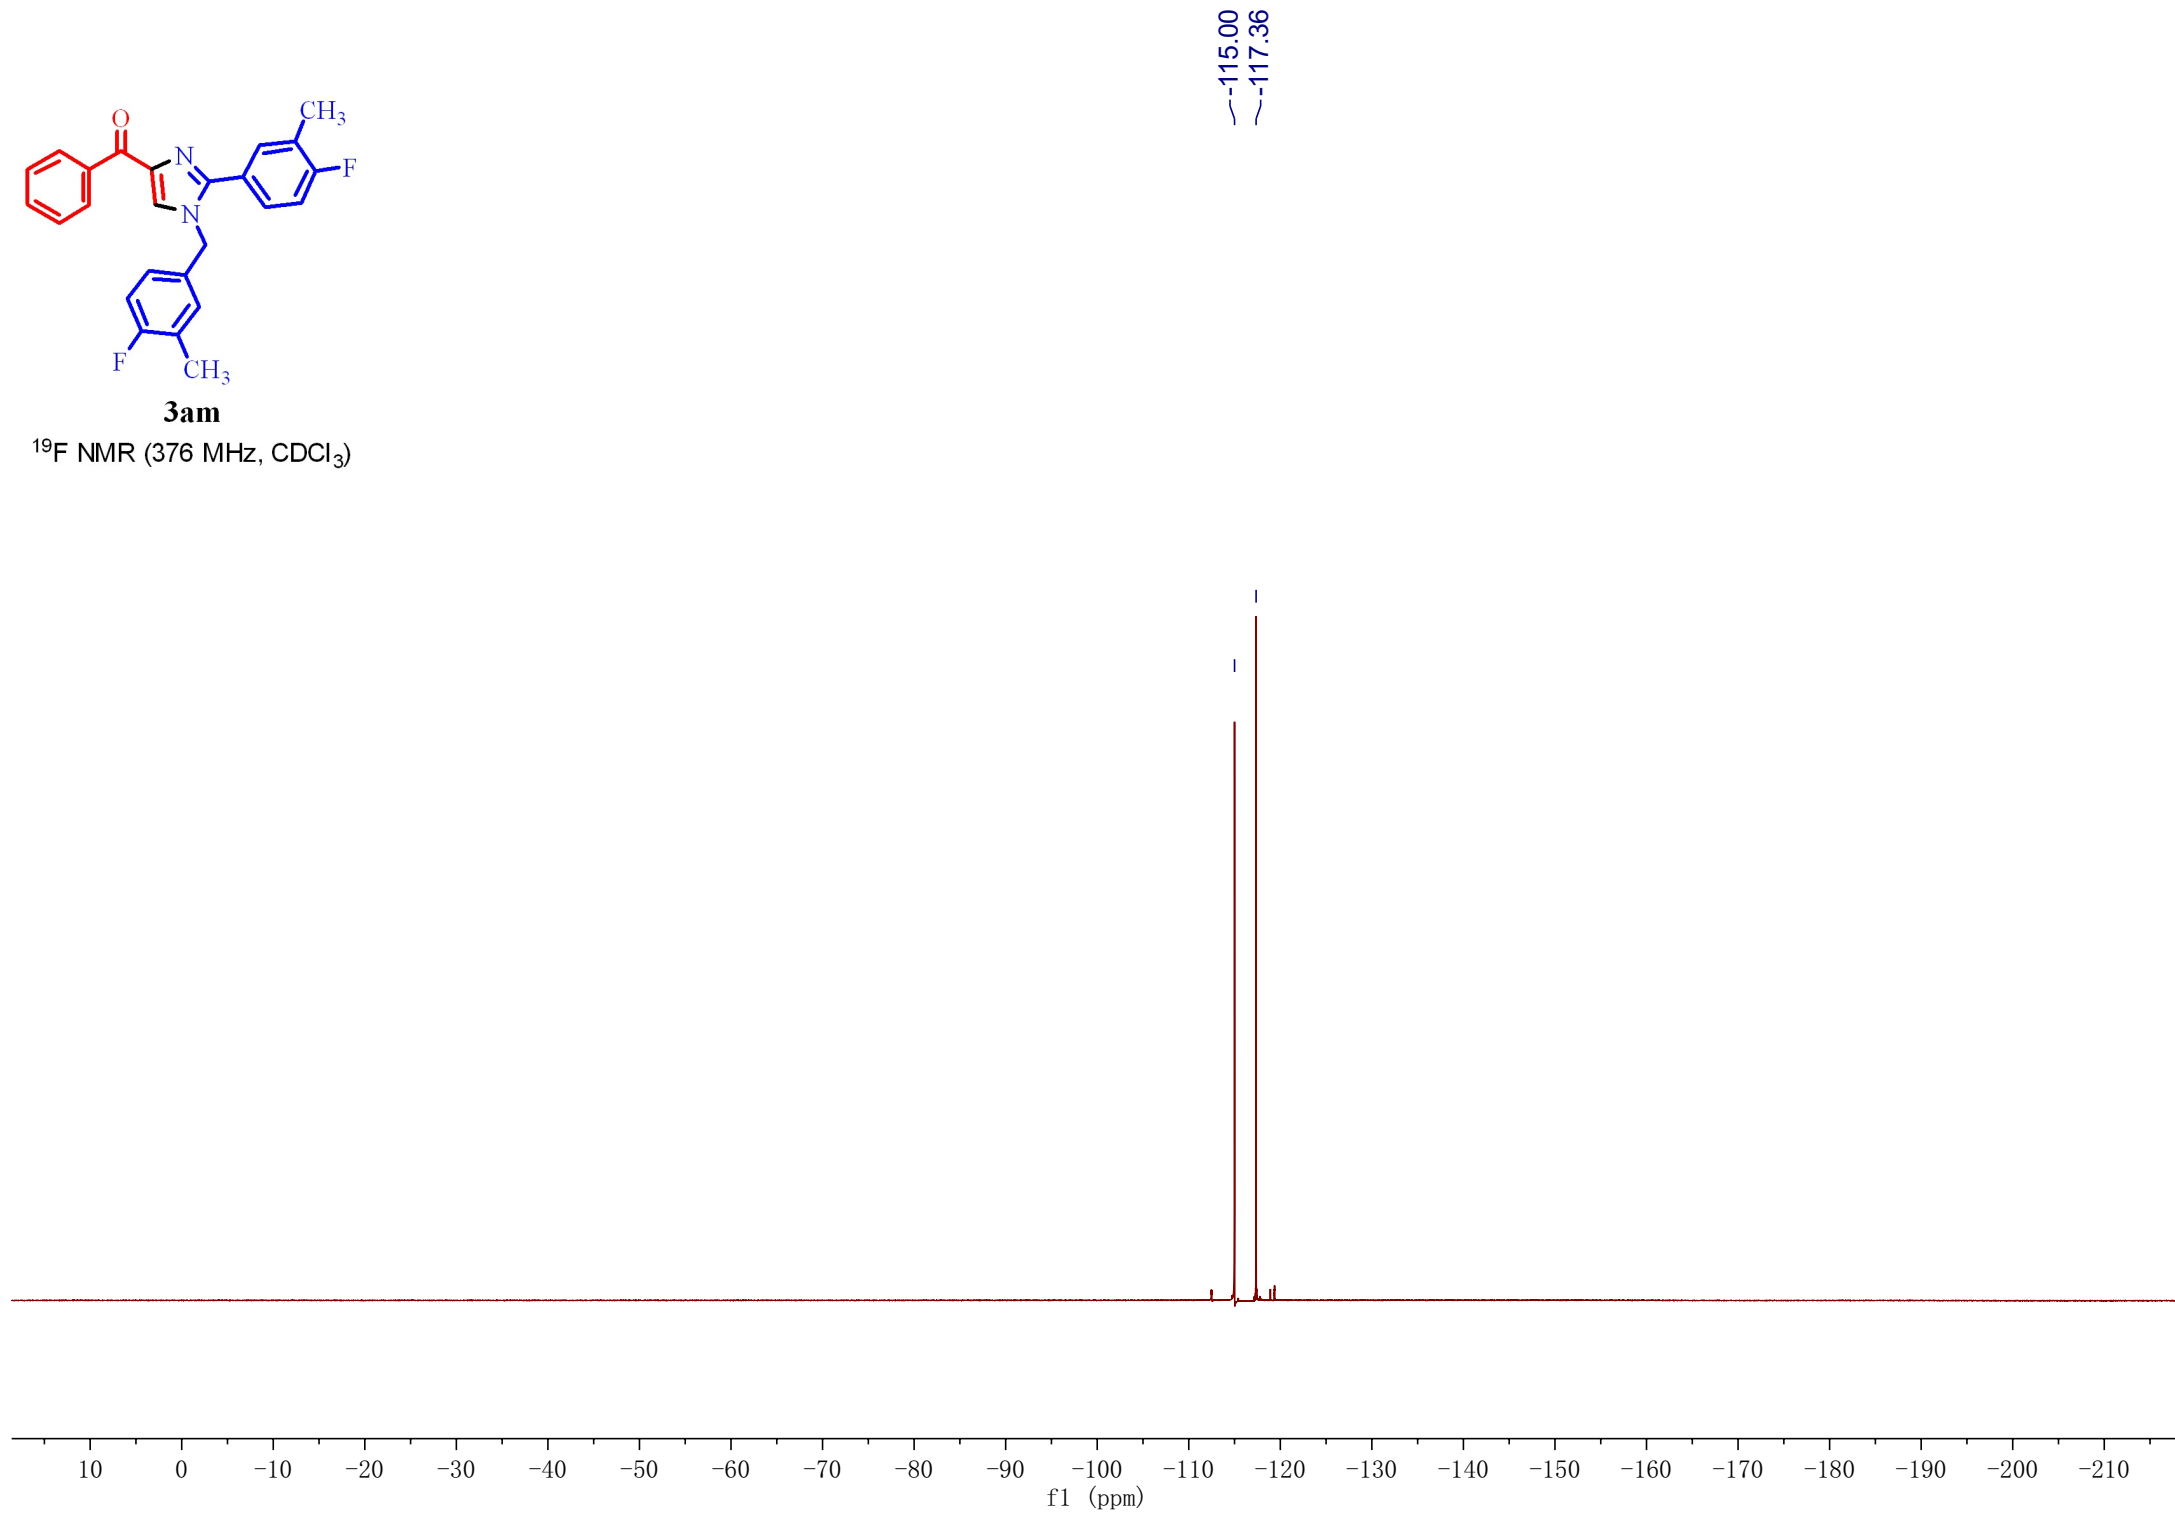

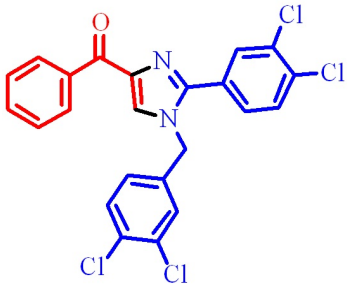

**3an**

$^1\text{H}$  NMR (400 MHz,  $\text{CDCl}_3$ )

8.295  
8.276  
7.757  
7.711  
7.571  
7.552  
7.528  
7.506  
7.485  
7.462  
7.440  
7.384  
7.379  
7.363  
7.260  
7.195  
6.929  
6.924  
6.908  
6.903

7.757  
7.711  
7.571  
7.552  
7.528  
7.506  
7.485  
7.462  
7.440  
7.260  
7.195  
6.929  
6.924  
6.908  
6.903

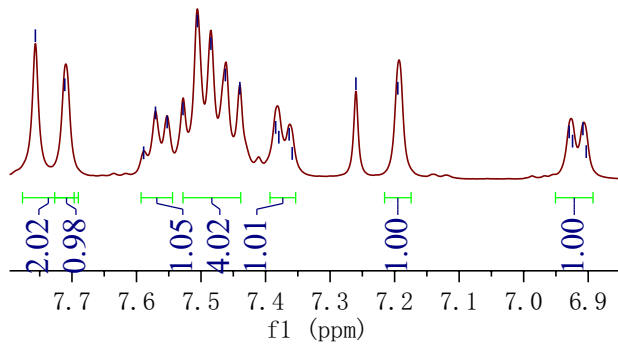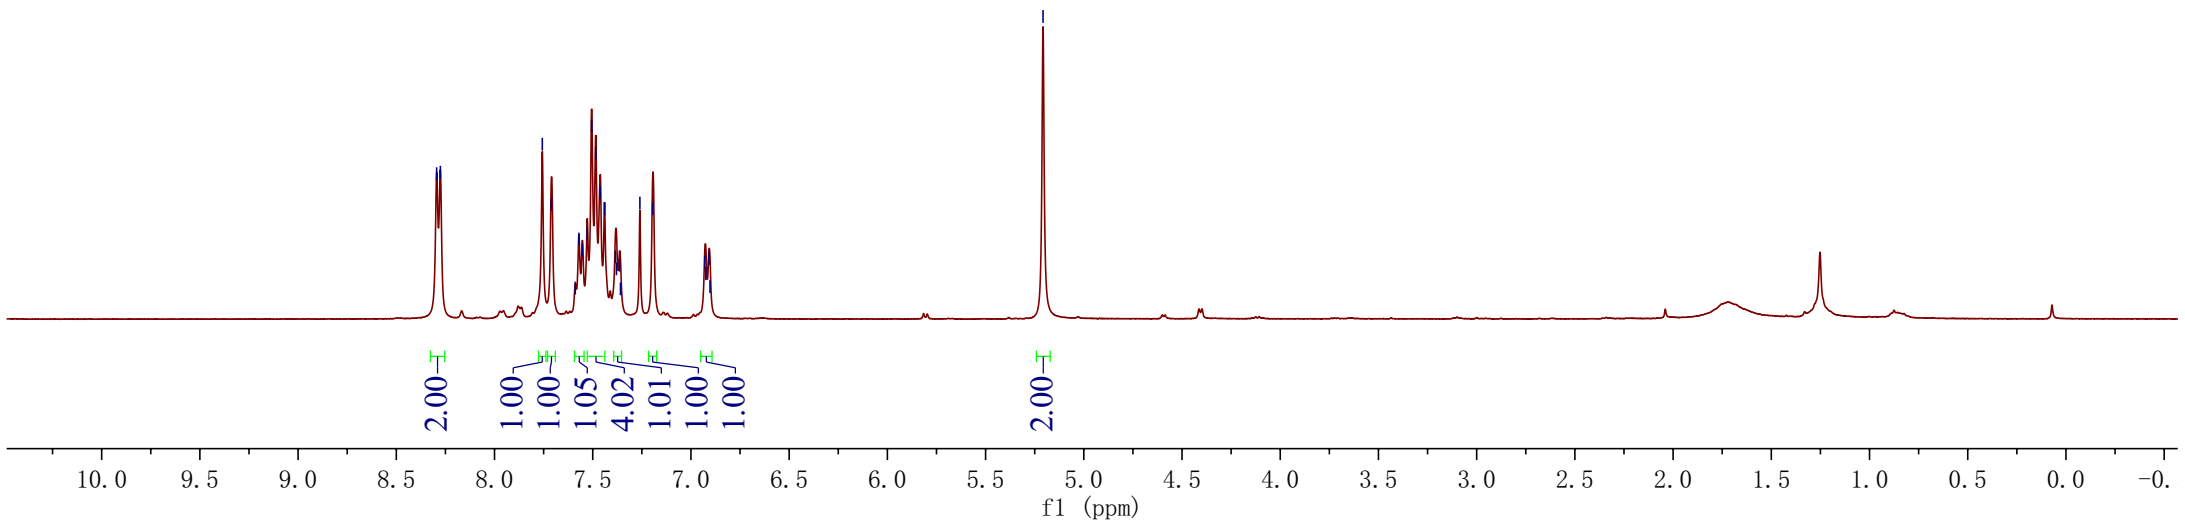

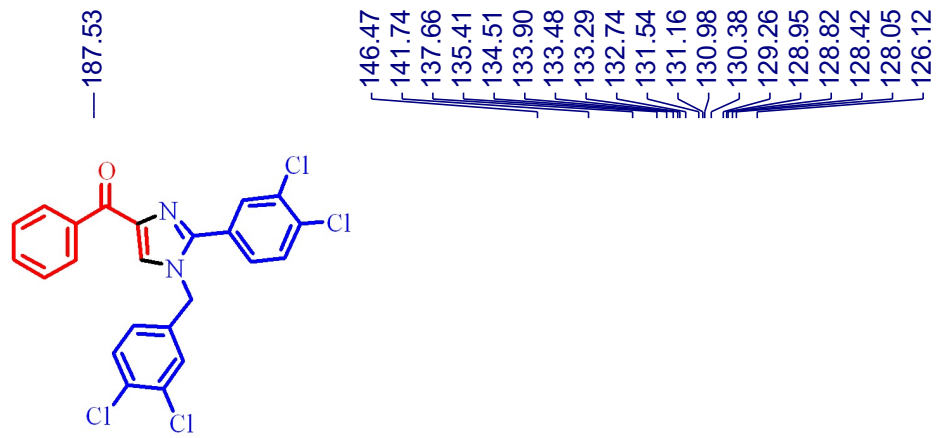

**3an**

$^{13}\text{C}$  NMR (100 MHz,  $\text{CDCl}_3$ )

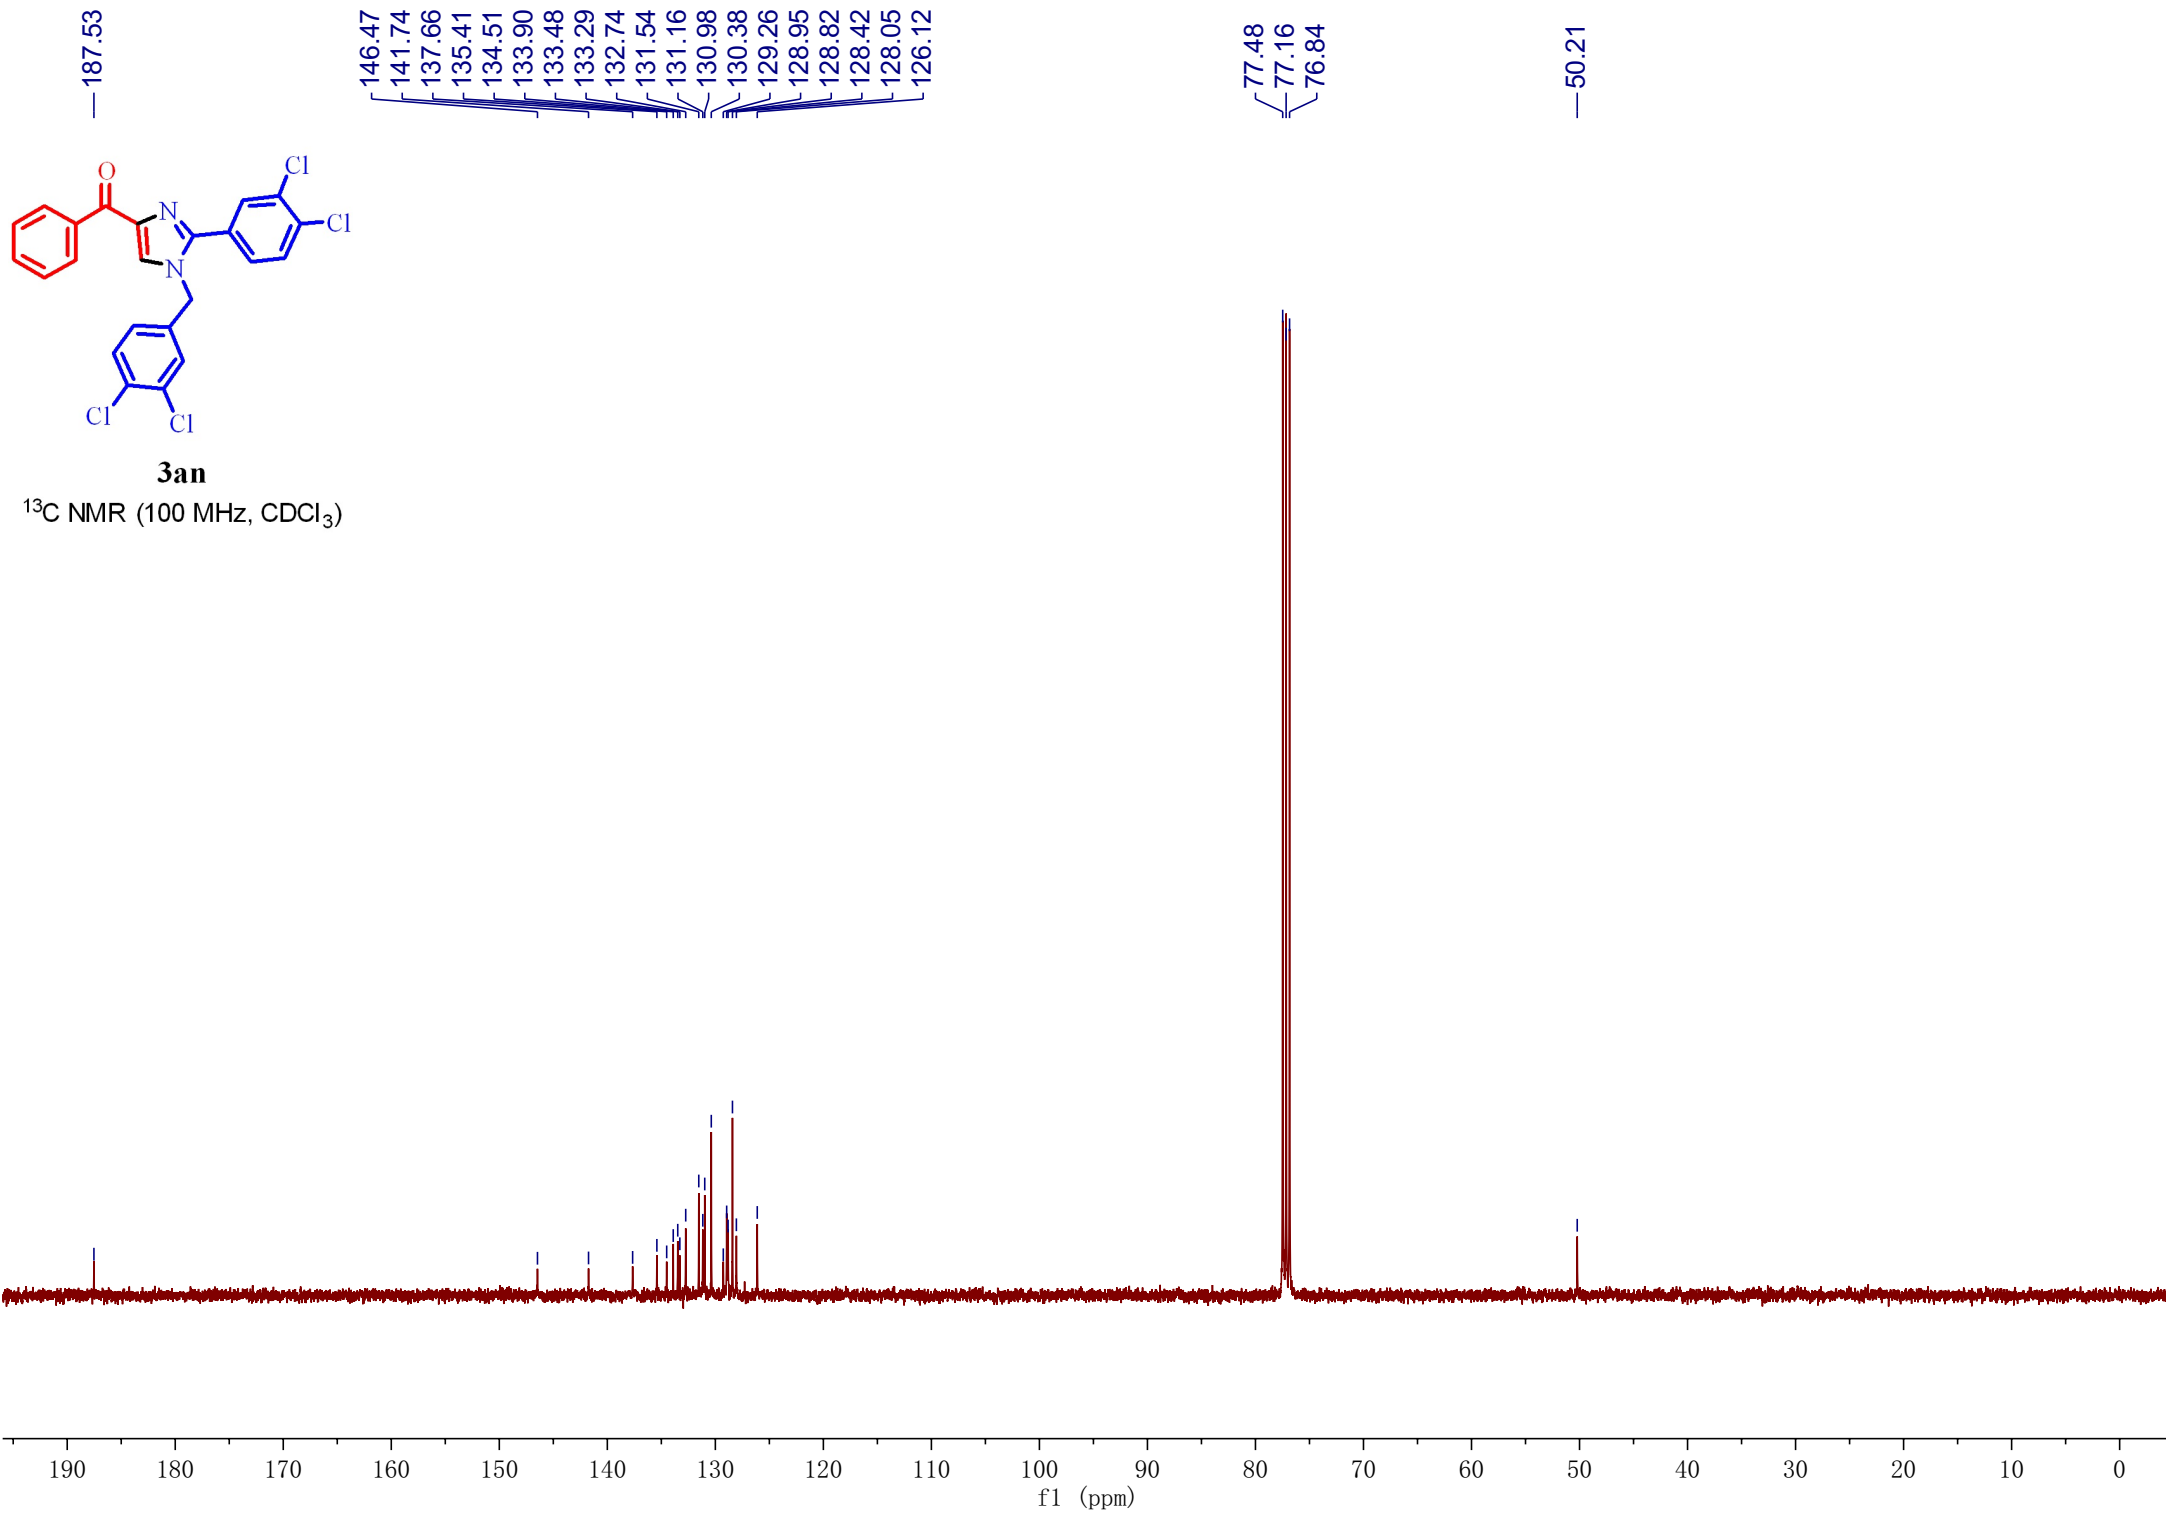

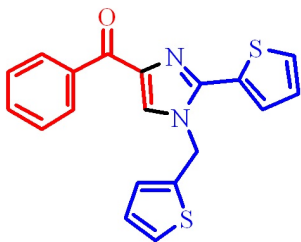

**3ao**

<sup>1</sup>H NMR (400 MHz, CDCl<sub>3</sub>)

8.305  
8.287  
7.768  
7.545  
7.484  
7.465  
7.454  
7.451  
7.388  
7.304  
7.260  
7.129  
7.120  
7.116  
7.107  
6.988  
6.976  
6.957

7.545  
7.527  
7.484  
7.465  
7.454  
7.451  
7.388  
7.379  
7.317  
7.313  
7.304  
7.301  
7.260  
7.129  
7.120  
7.116  
7.107  
6.997  
6.988  
6.976  
6.957

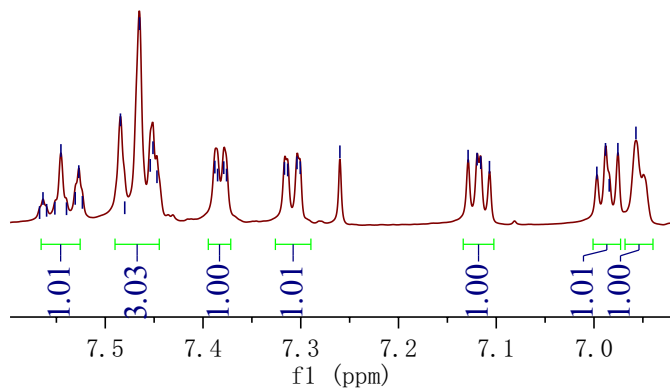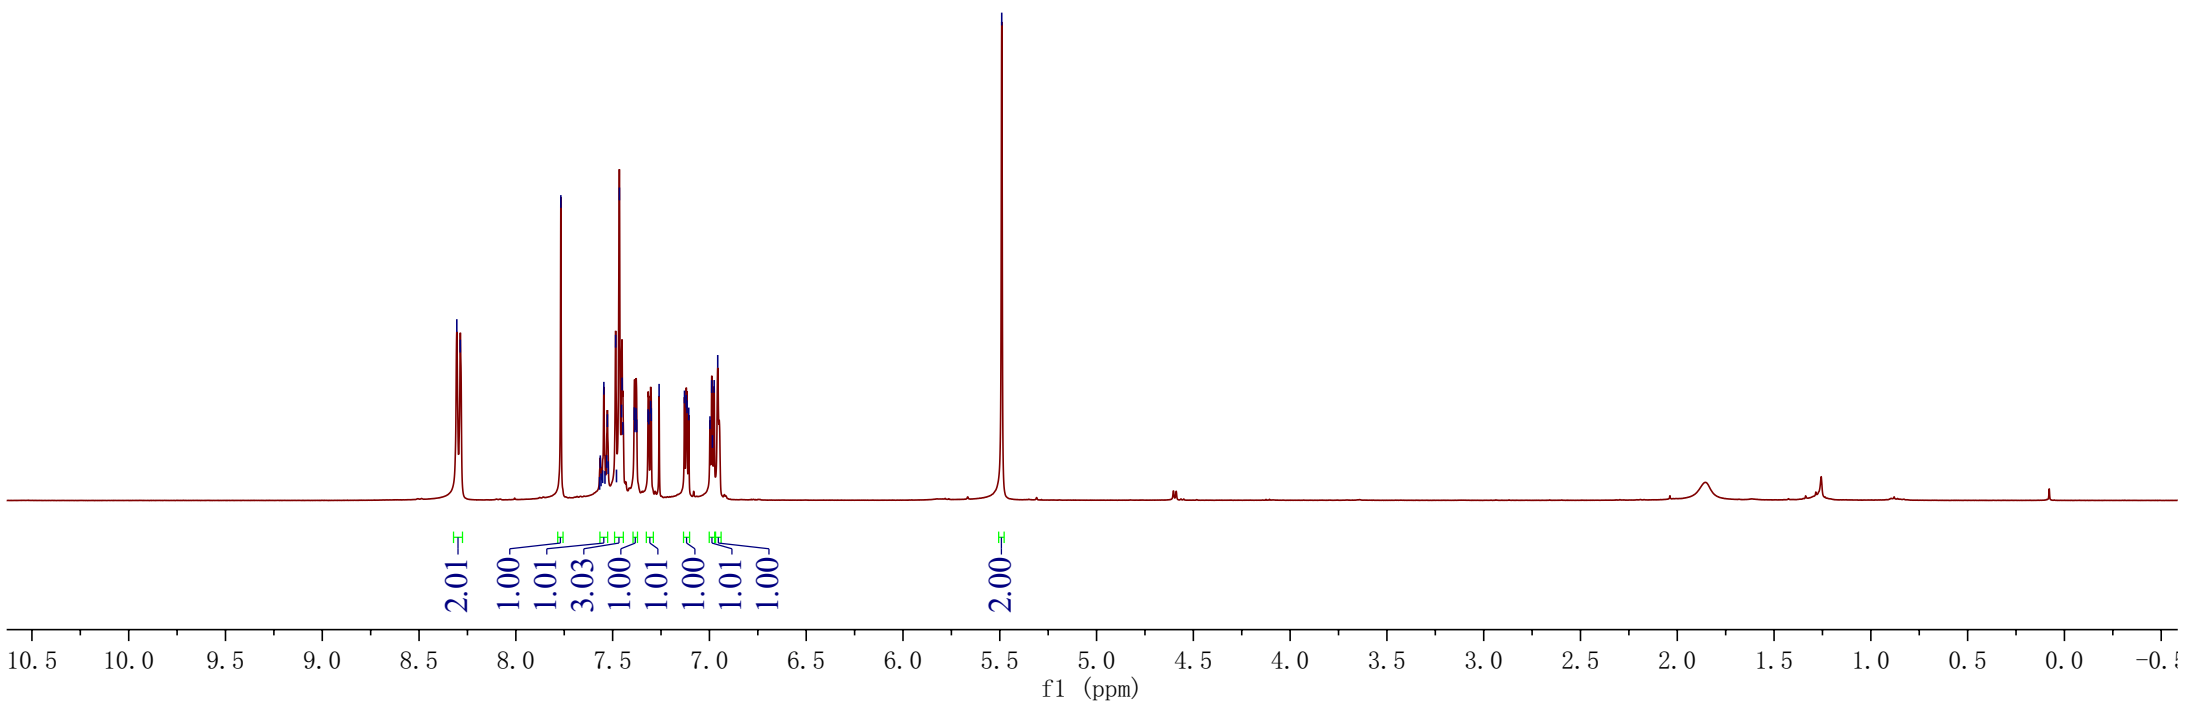

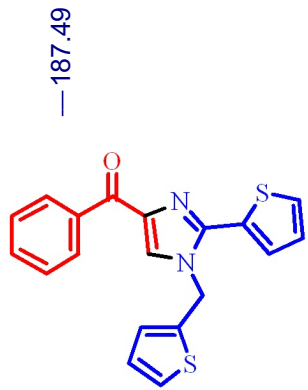

**3ao**

$^{13}\text{C}$  NMR (100 MHz,  $\text{CDCl}_3$ )

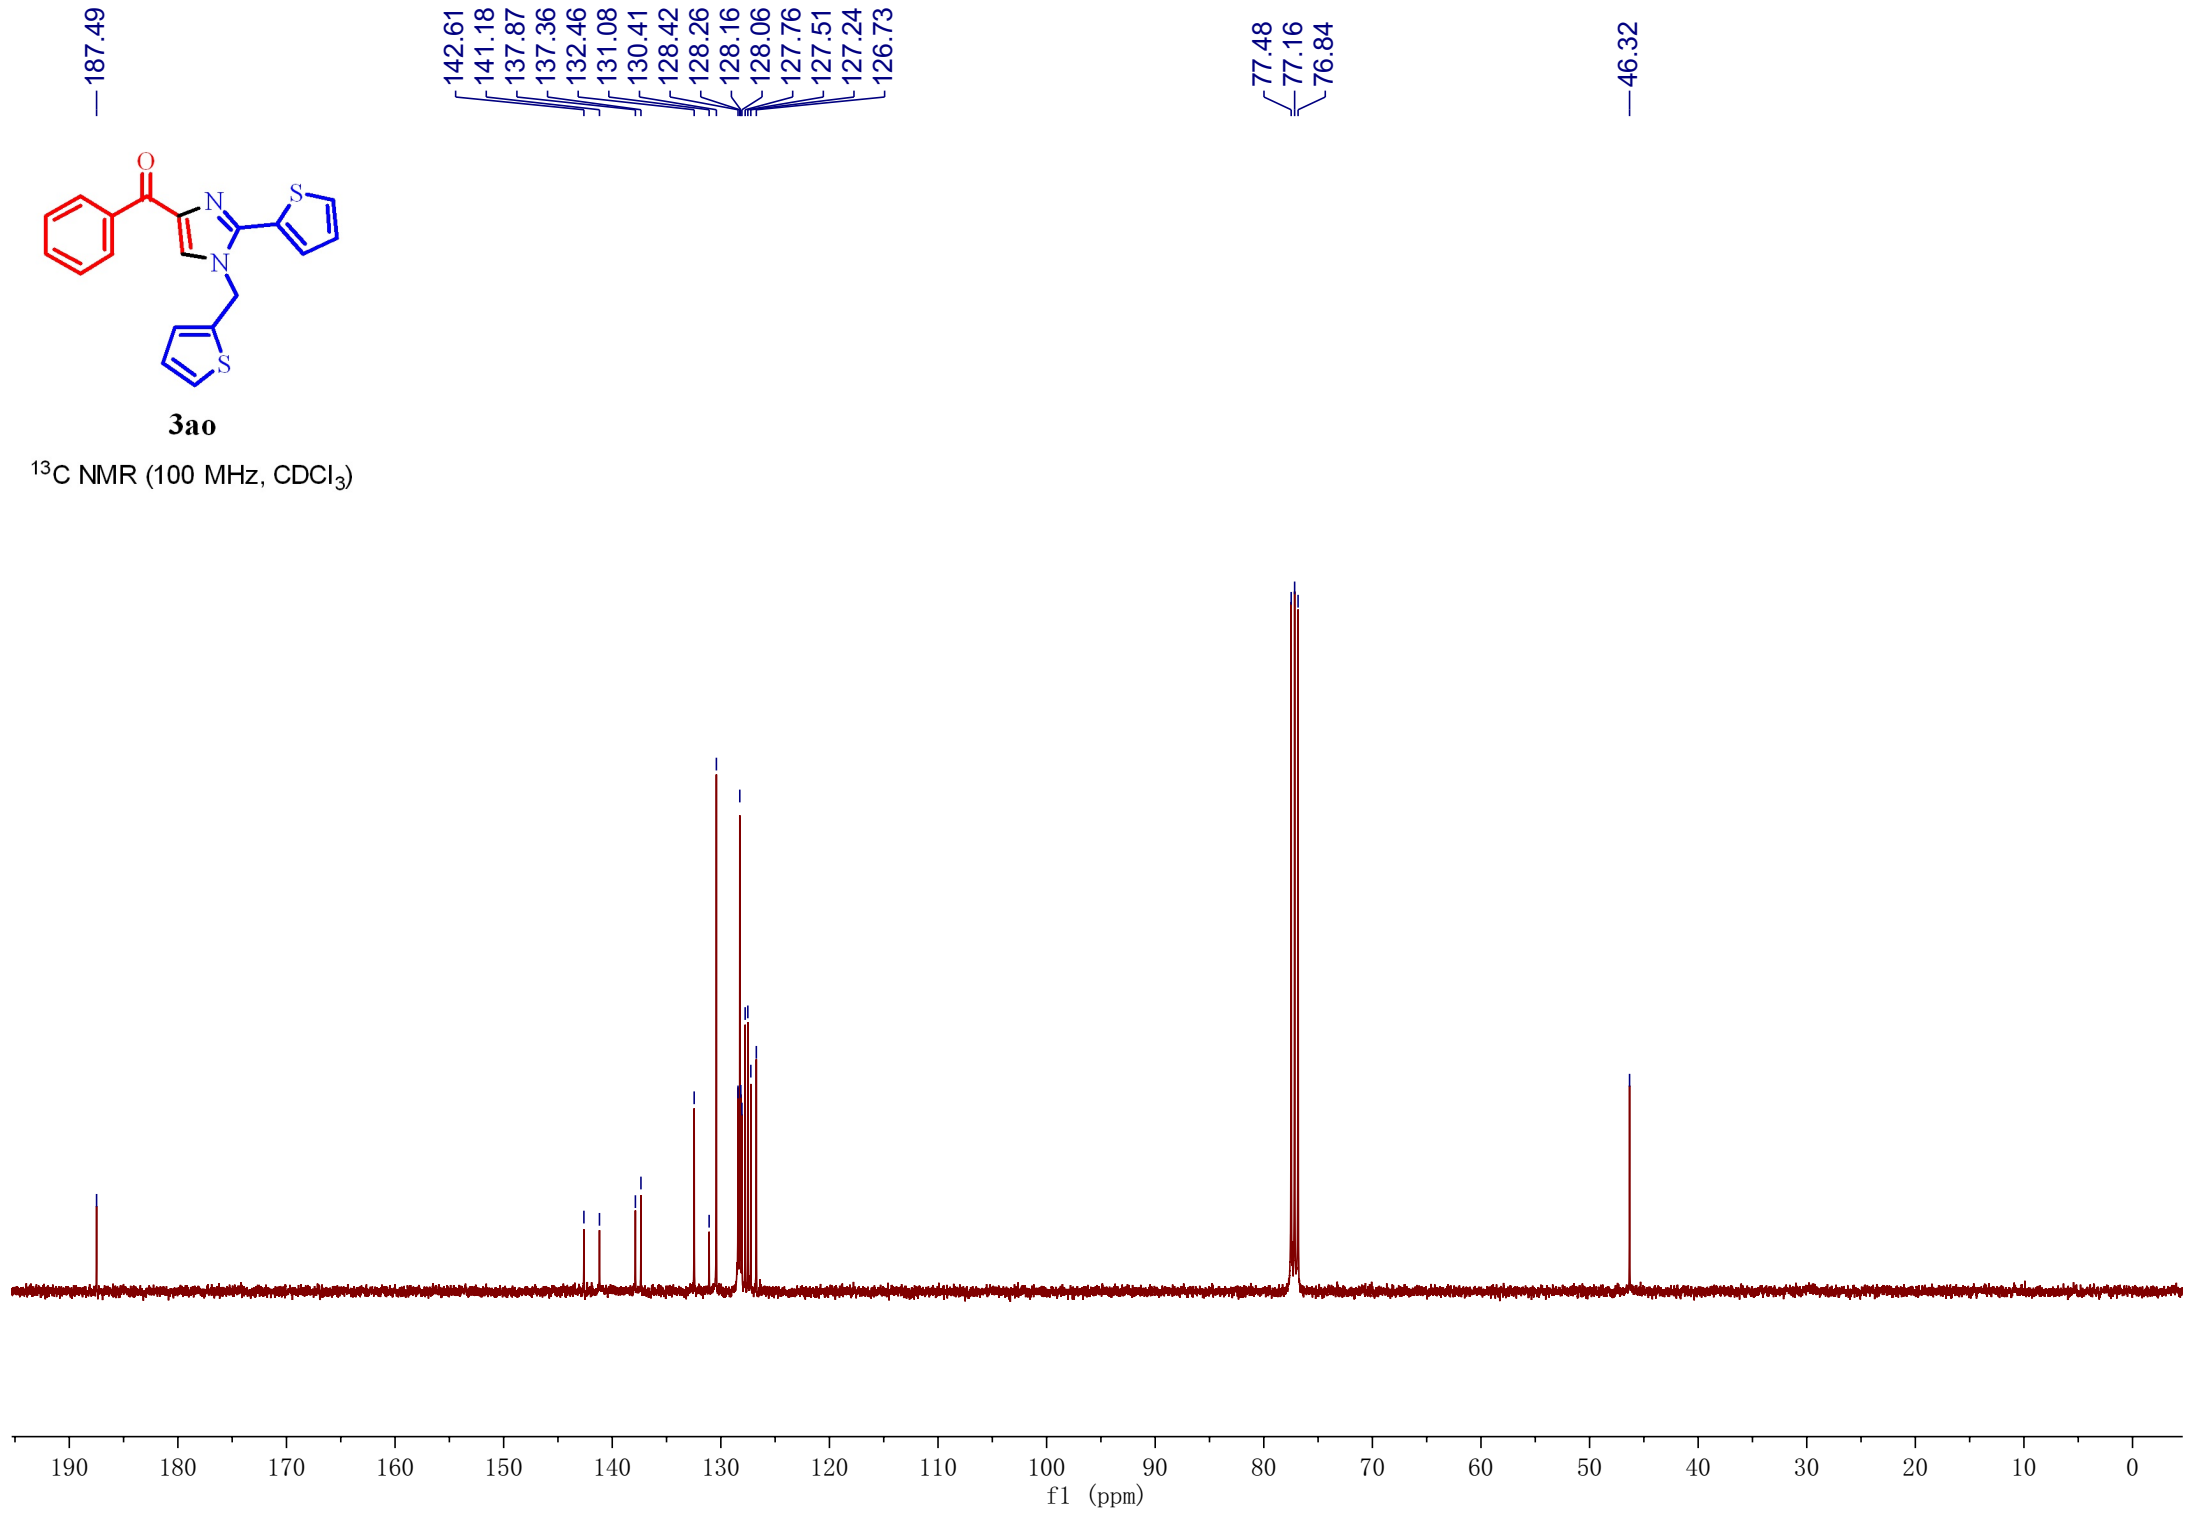

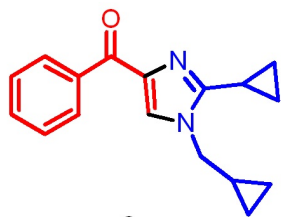

**3ap**

<sup>1</sup>H NMR (400 MHz, CDCl<sub>3</sub>)

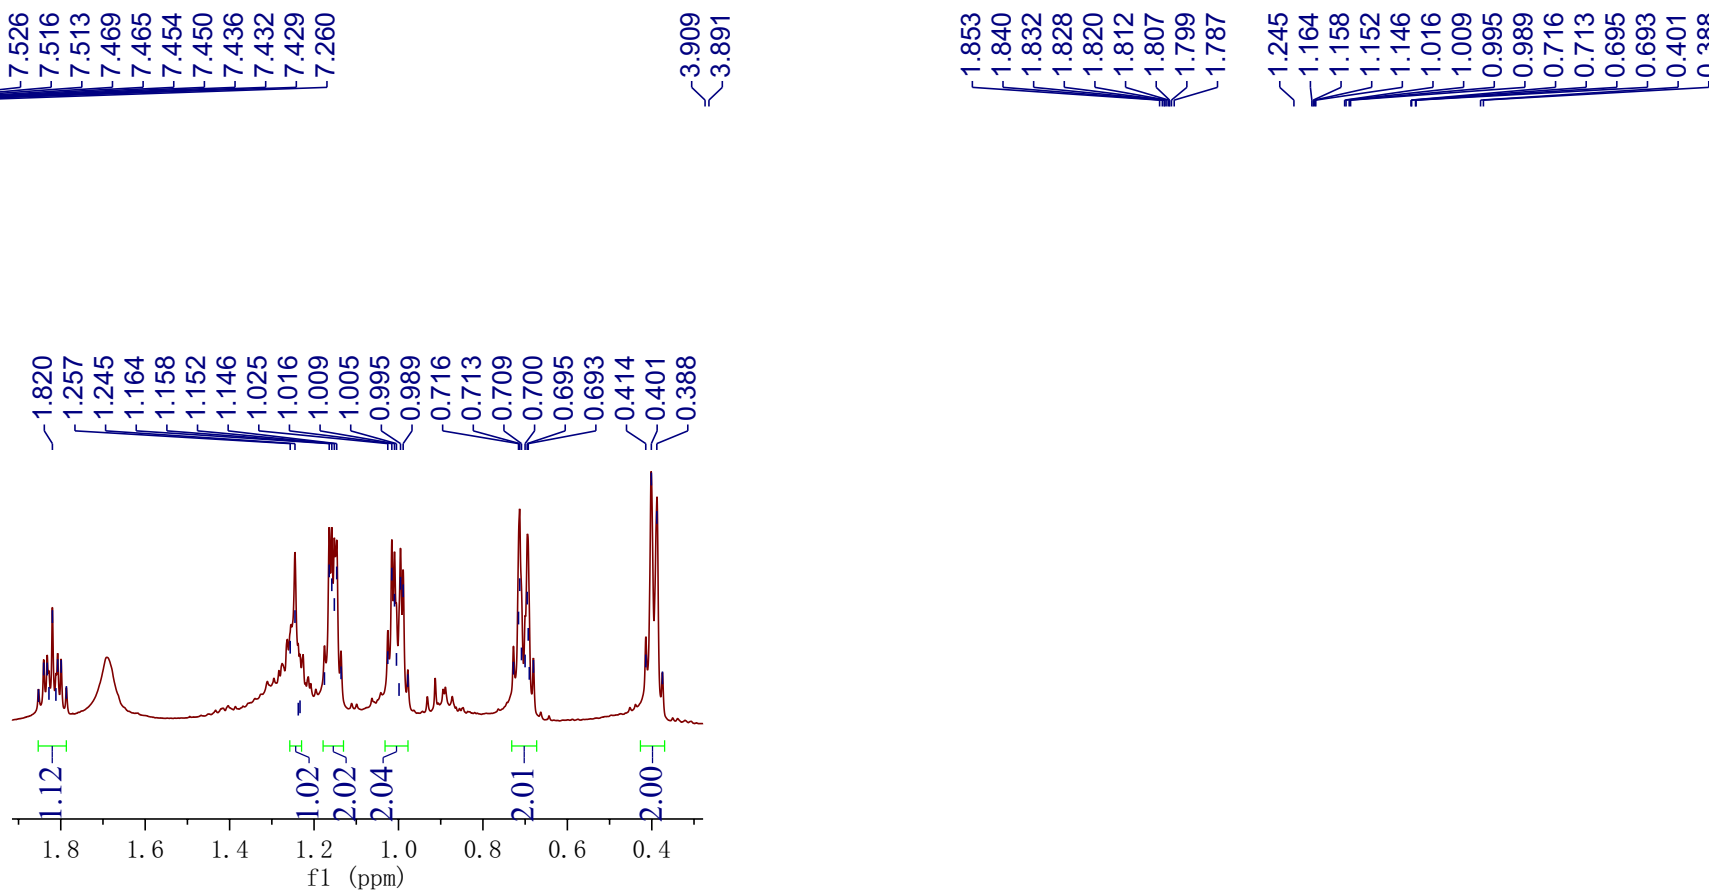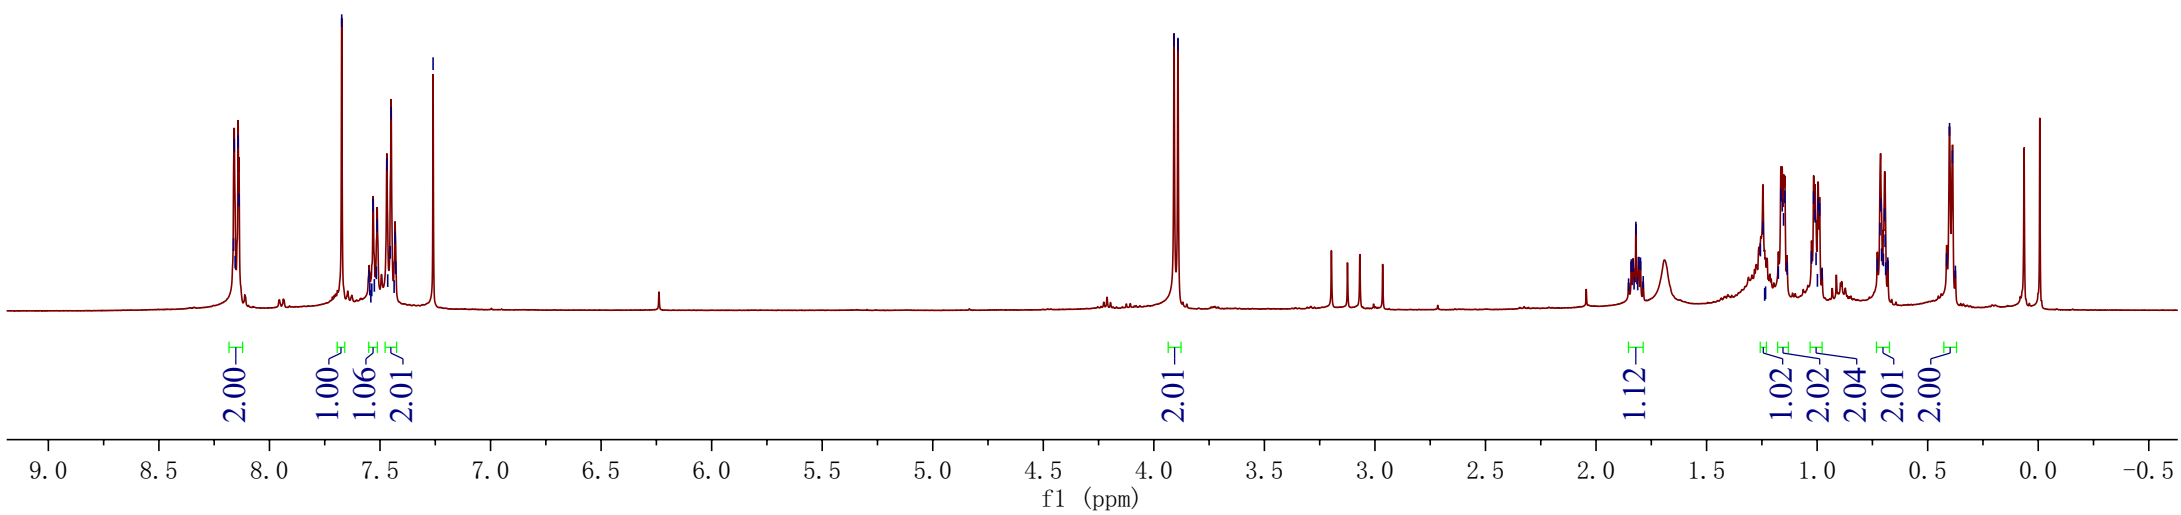



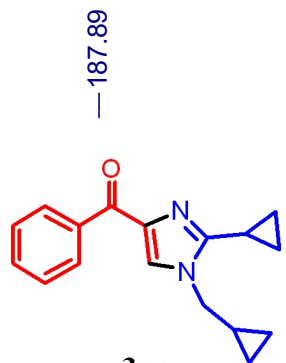

$^{13}\text{C}$  NMR (100 MHz,  $\text{CDCl}_3$ )

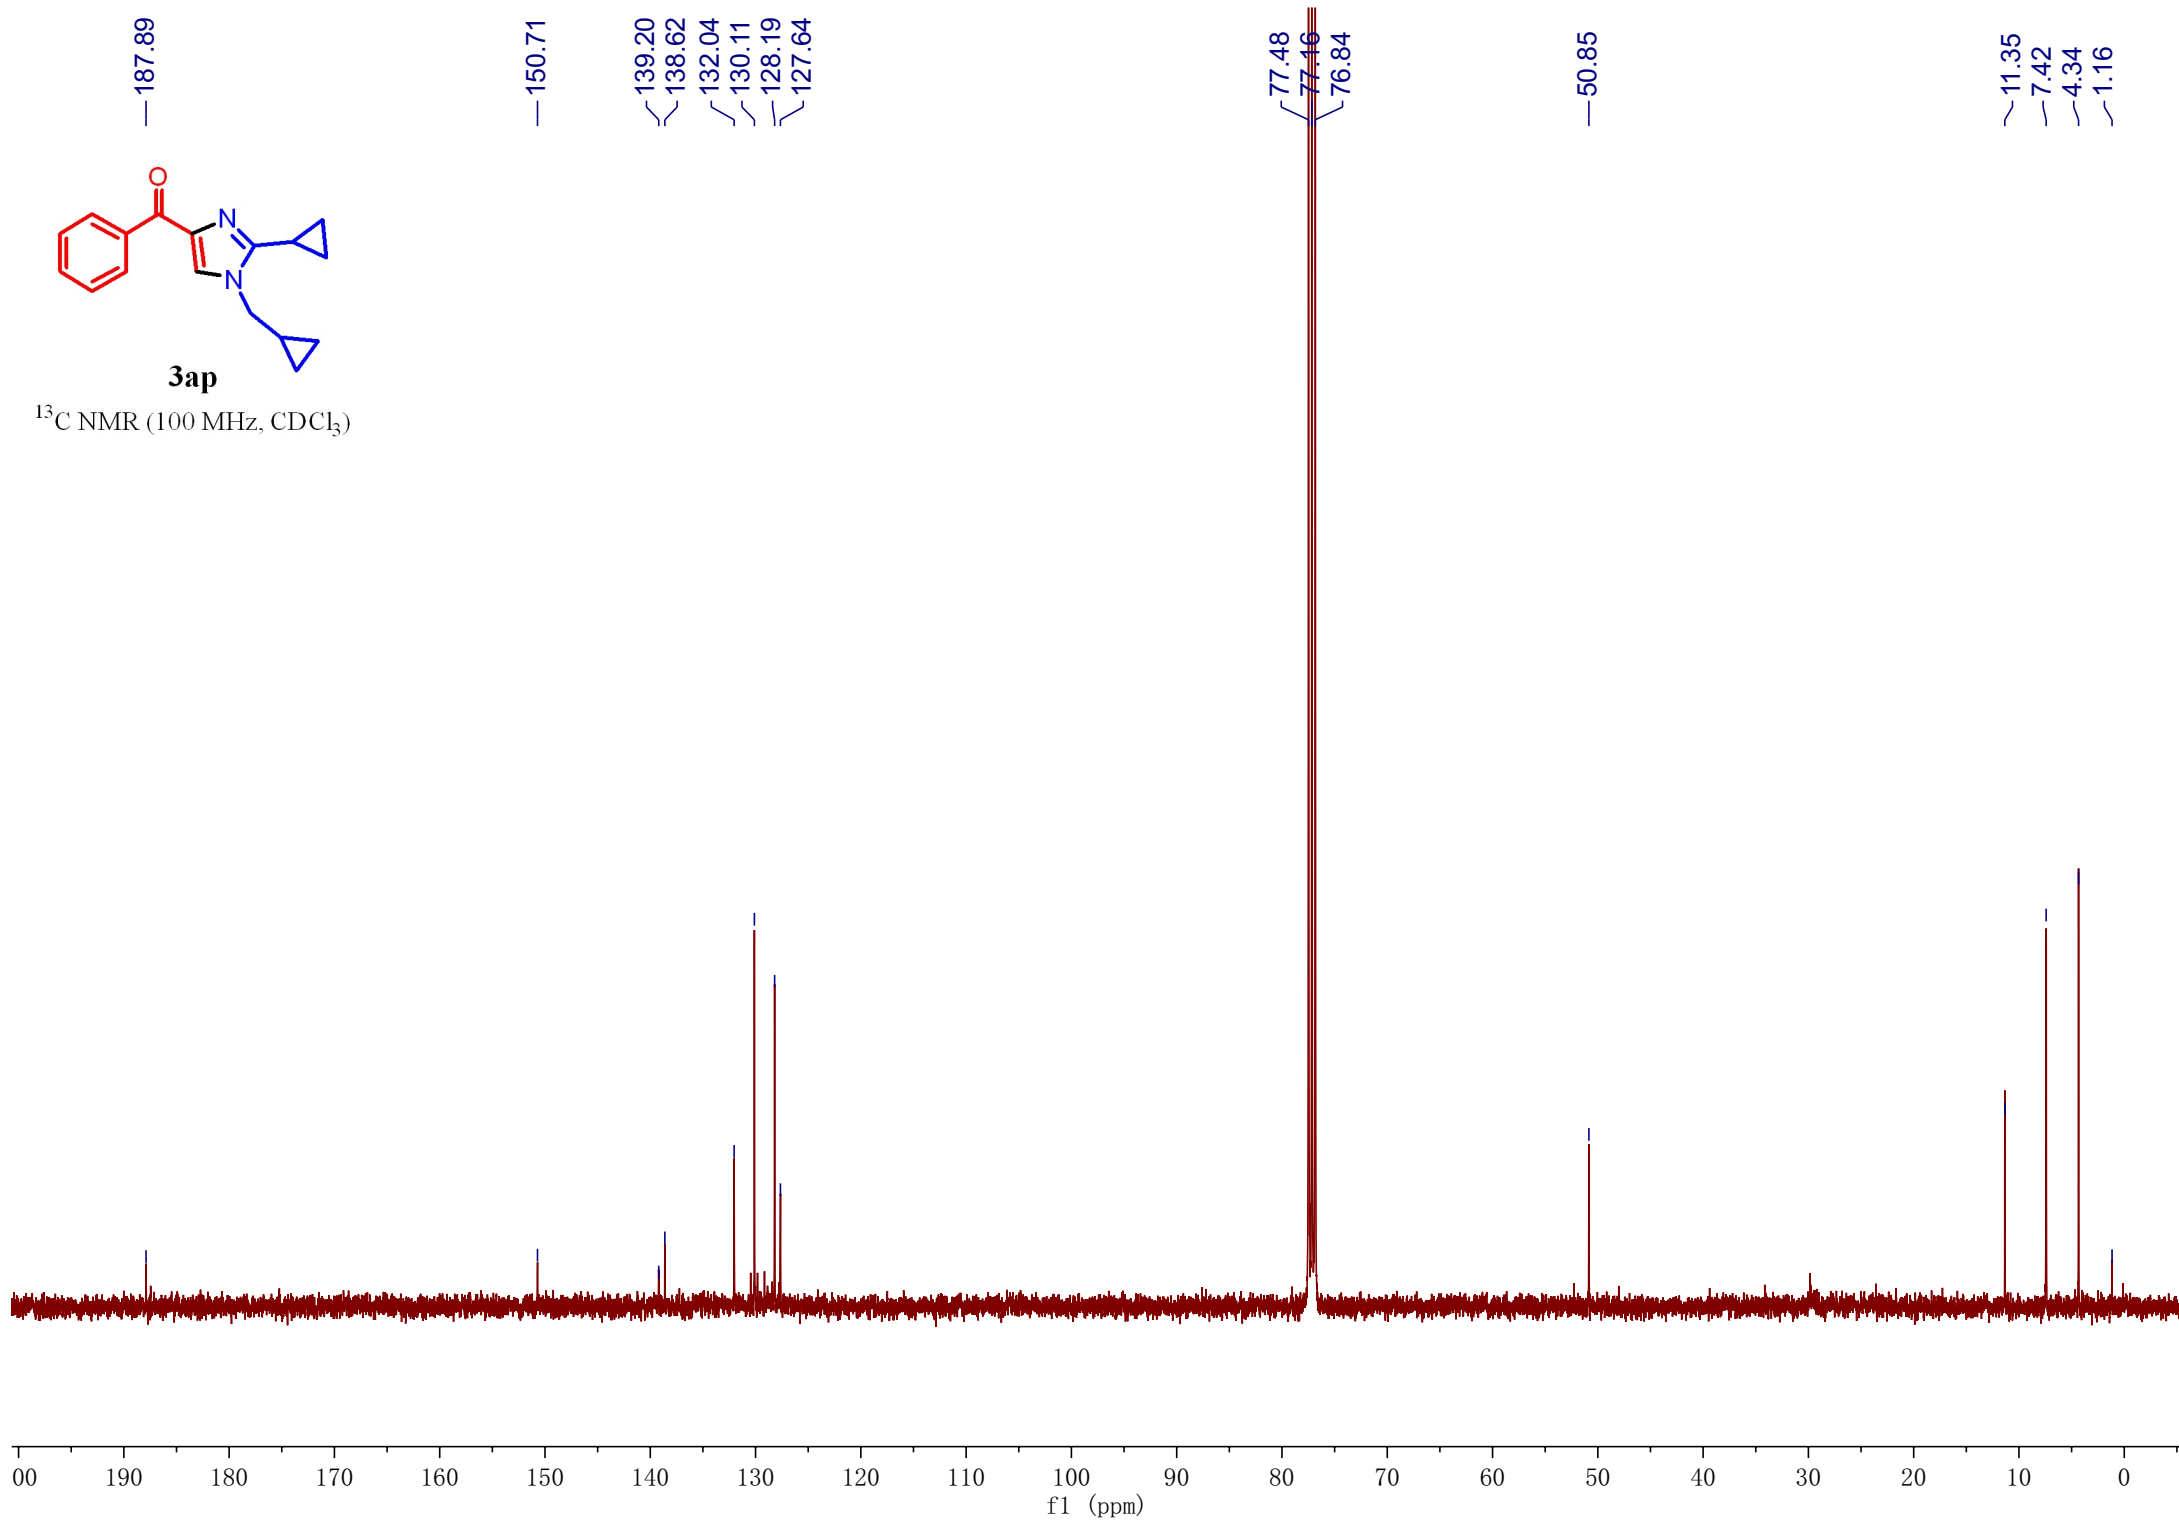

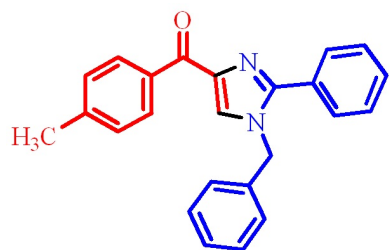

**3ba**

<sup>1</sup>H NMR (400 MHz, CDCl<sub>3</sub>)

8.161  
8.140  
7.649  
7.552  
7.547  
7.538  
7.528  
7.371  
7.365  
7.357  
7.354  
7.295  
7.280  
7.261  
7.244  
7.198  
7.181  
7.041  
7.036  
7.022  
7.017

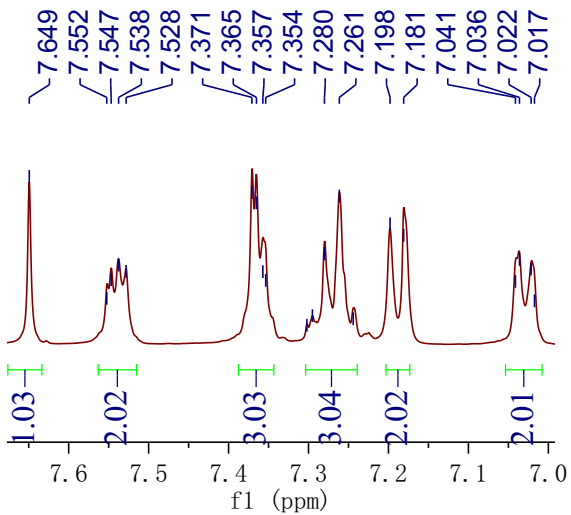

2.328

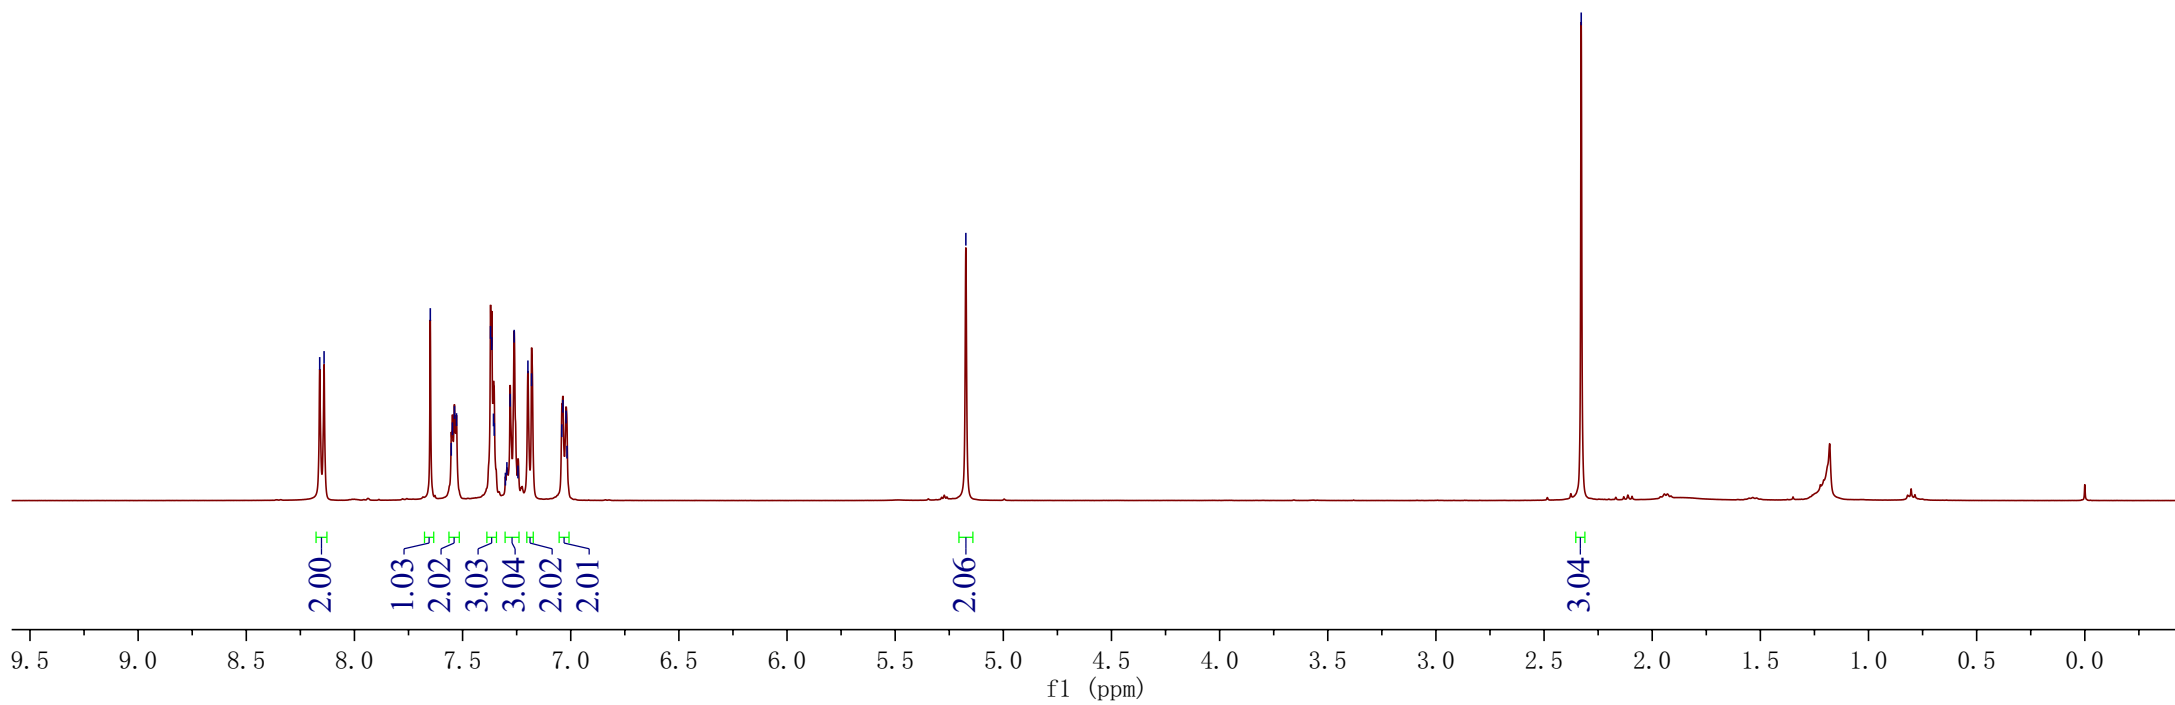

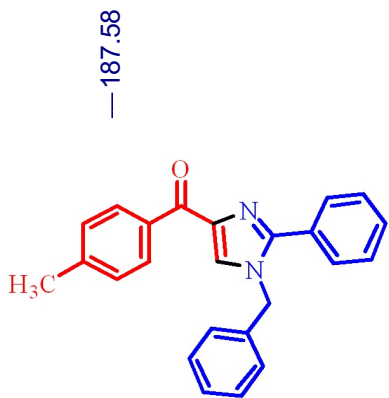

$^{13}\text{C}$  NMR (100 MHz,  $\text{CDCl}_3$ )

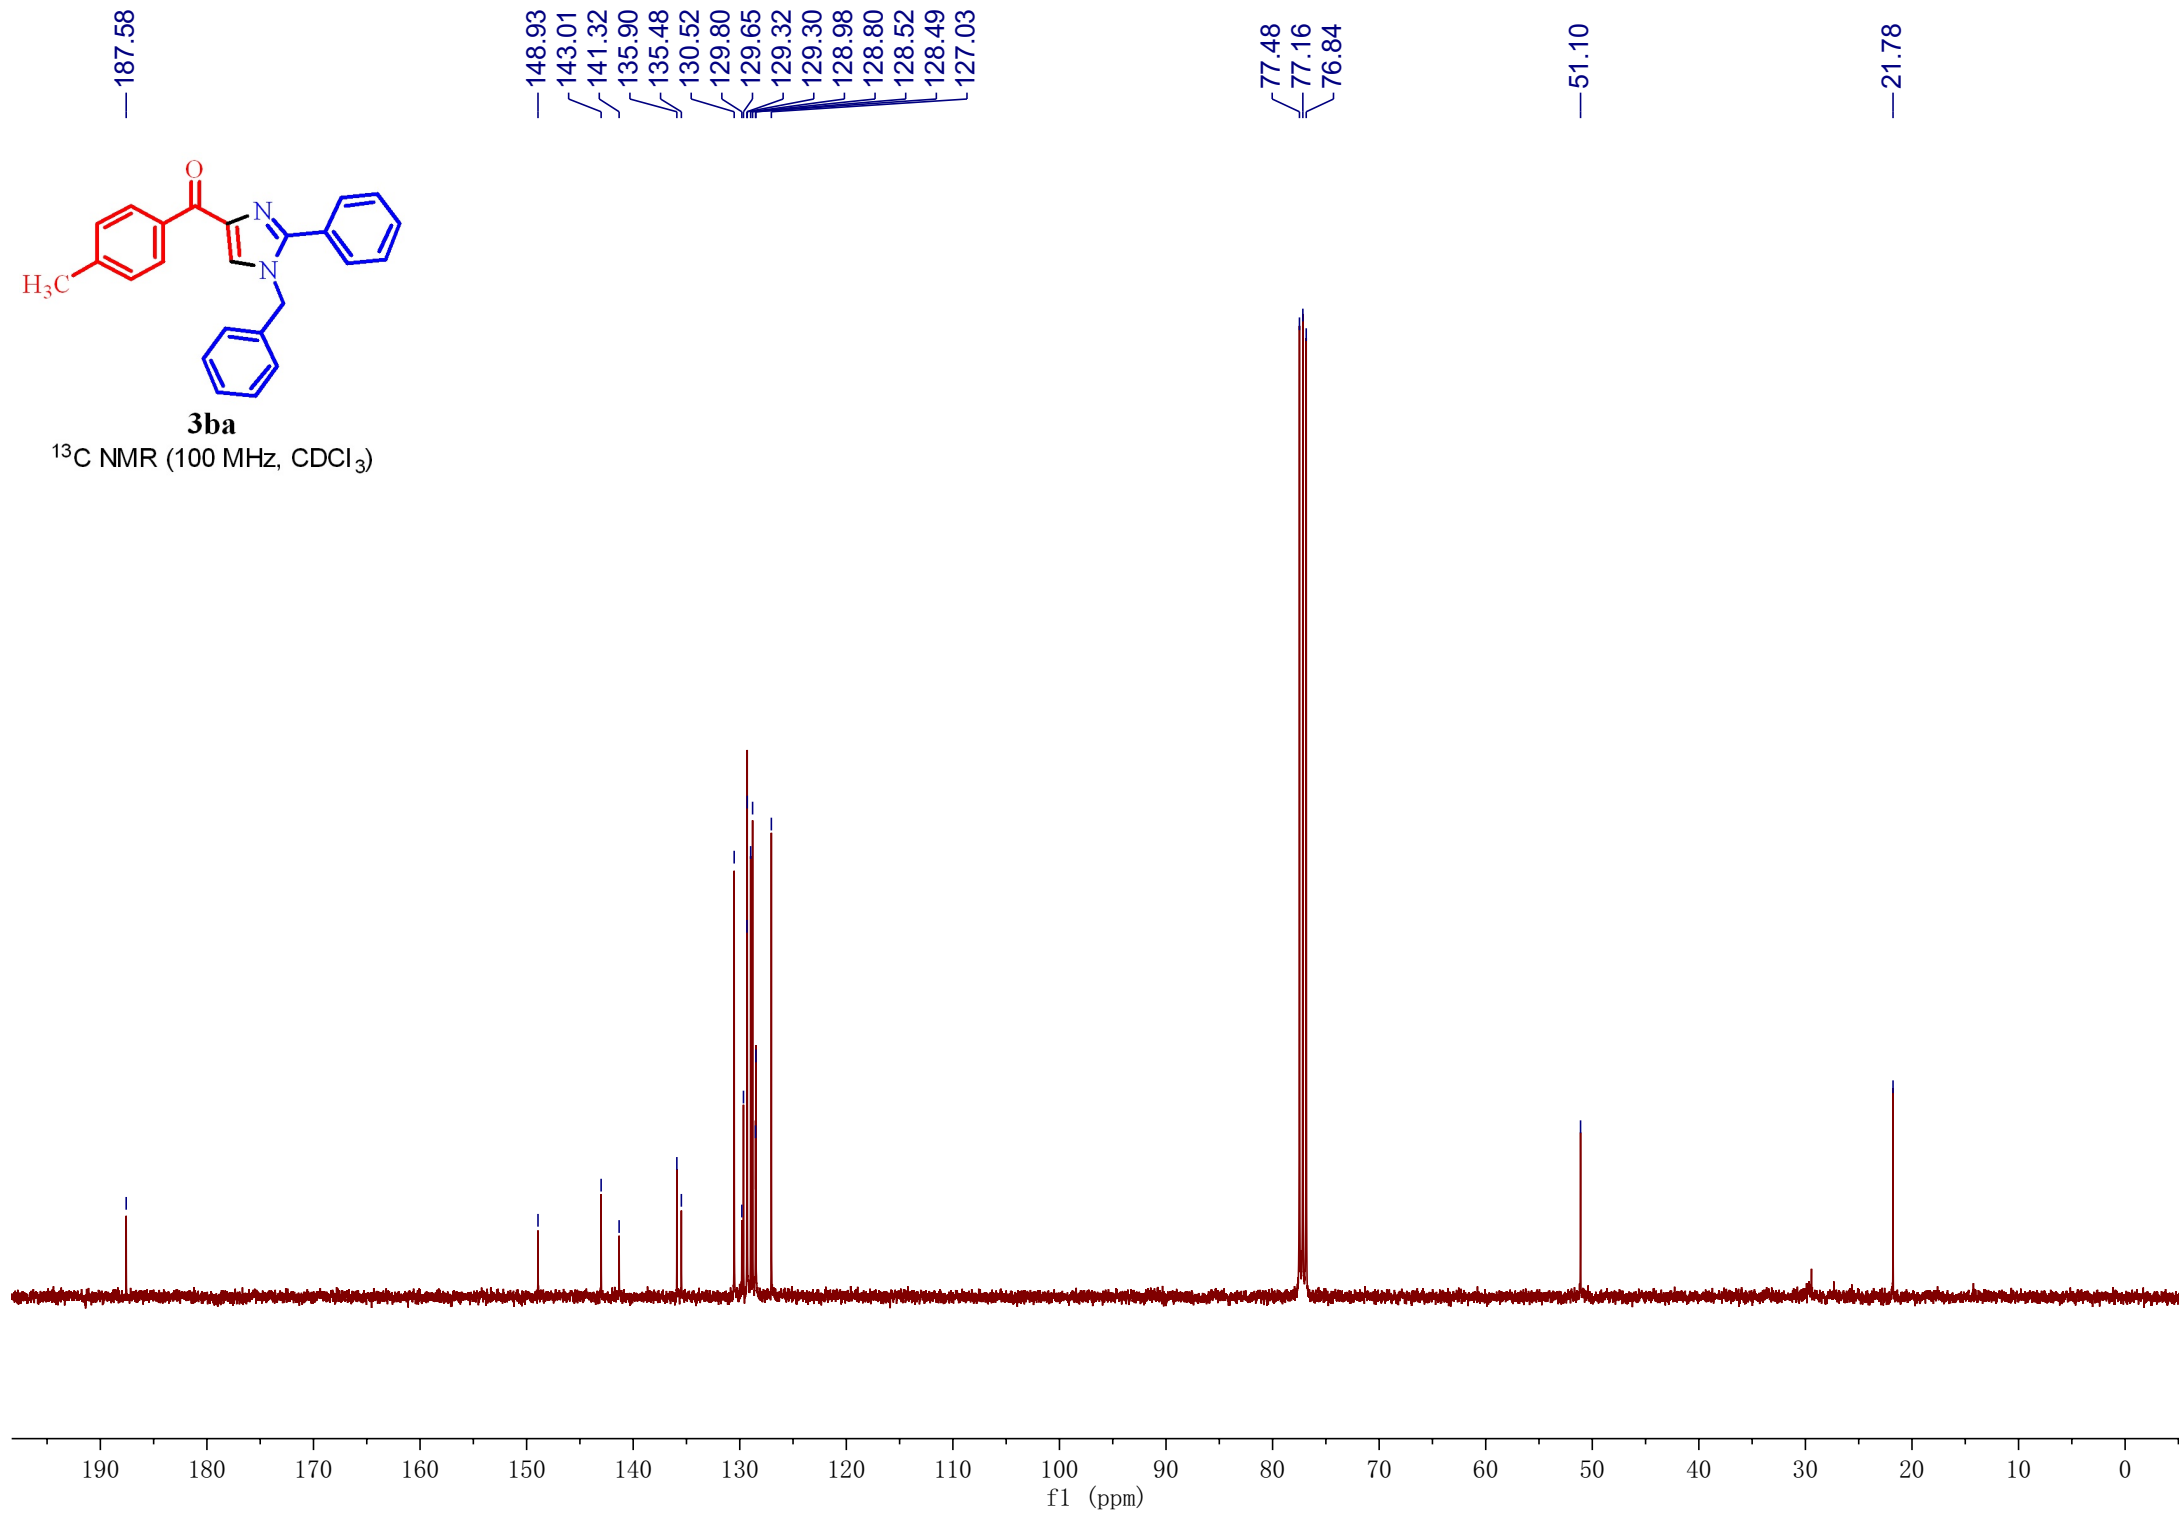

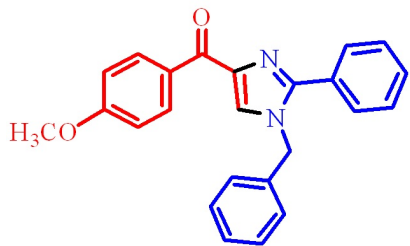

**3ca**

<sup>1</sup>H NMR (400 MHz, CDCl<sub>3</sub>)

8.457  
8.451  
8.440  
8.434  
8.427  
7.757  
7.632  
7.626  
7.617  
7.608  
7.453  
7.446  
7.436  
7.359  
7.340  
7.321  
7.260  
7.125  
7.120  
7.106  
7.102  
6.973  
6.968  
6.951  
3.863

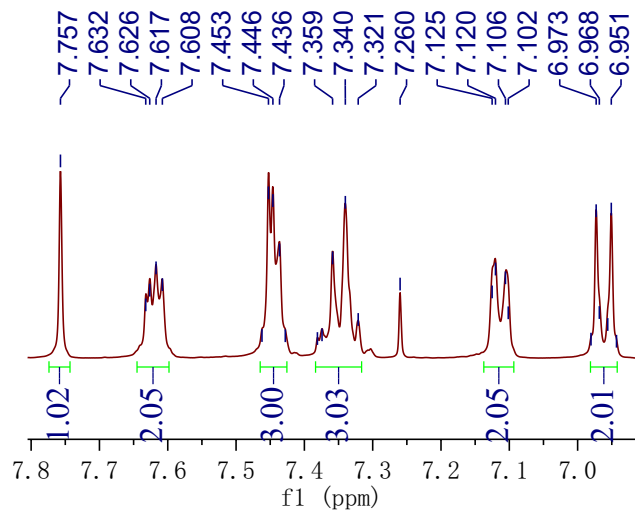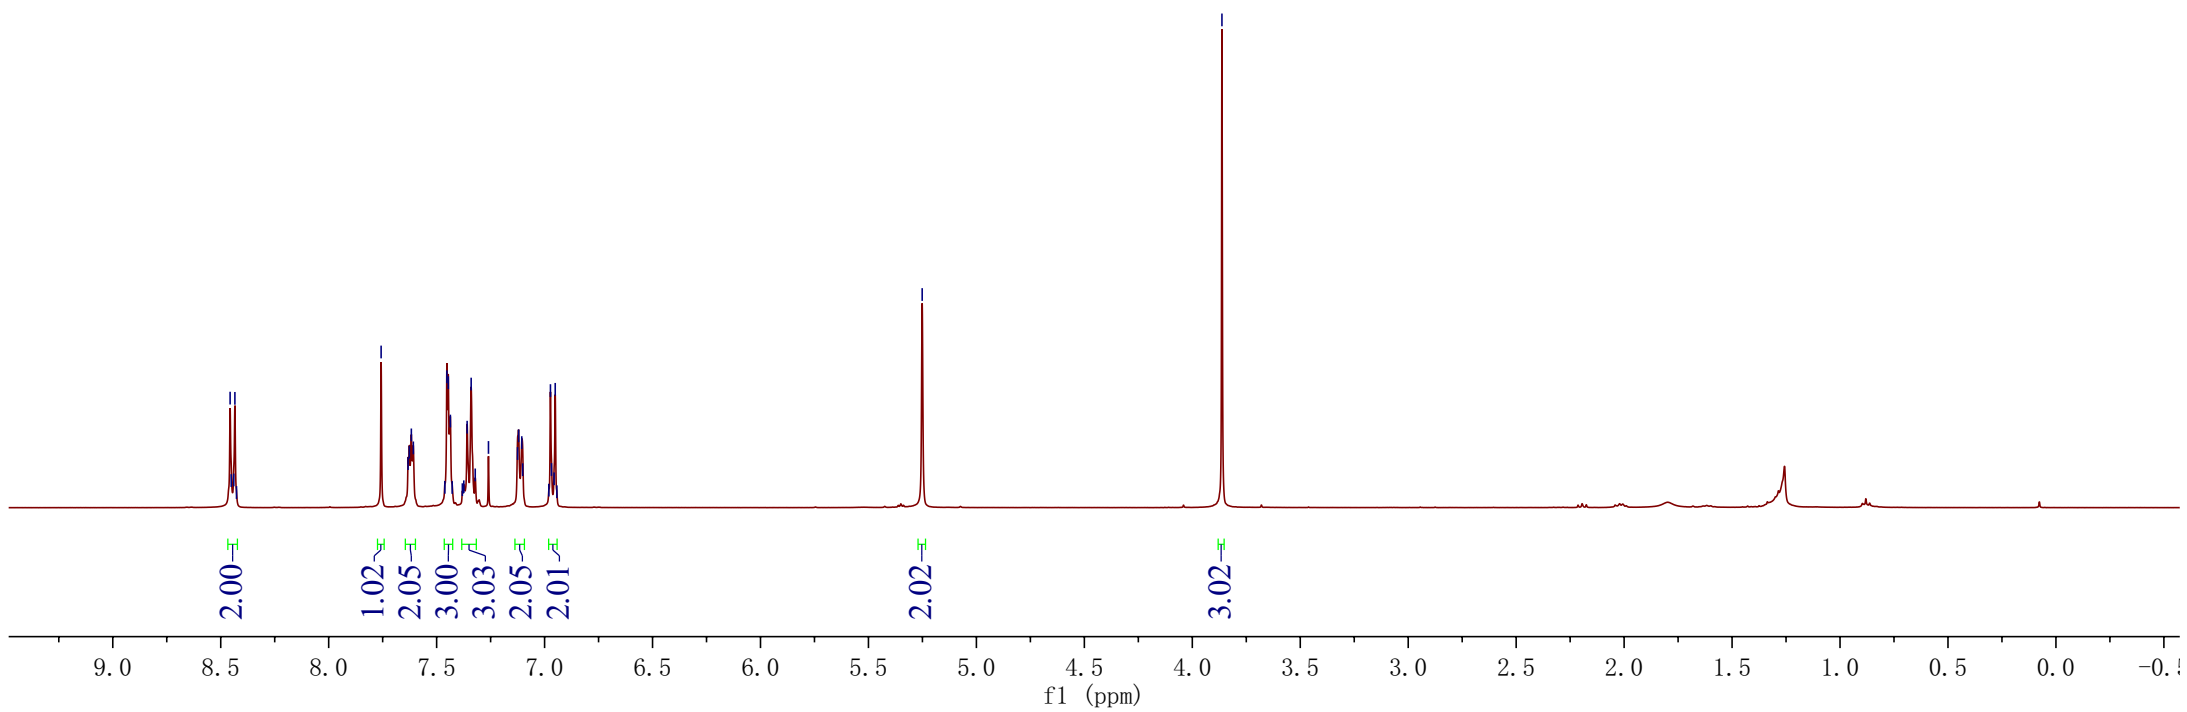

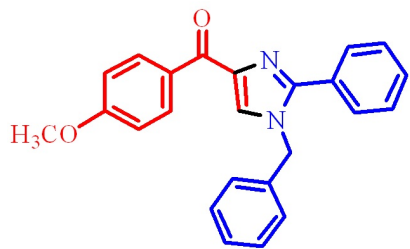

**3ca**

$^{13}\text{C}$  NMR (100 MHz,  $\text{CDCl}_3$ )

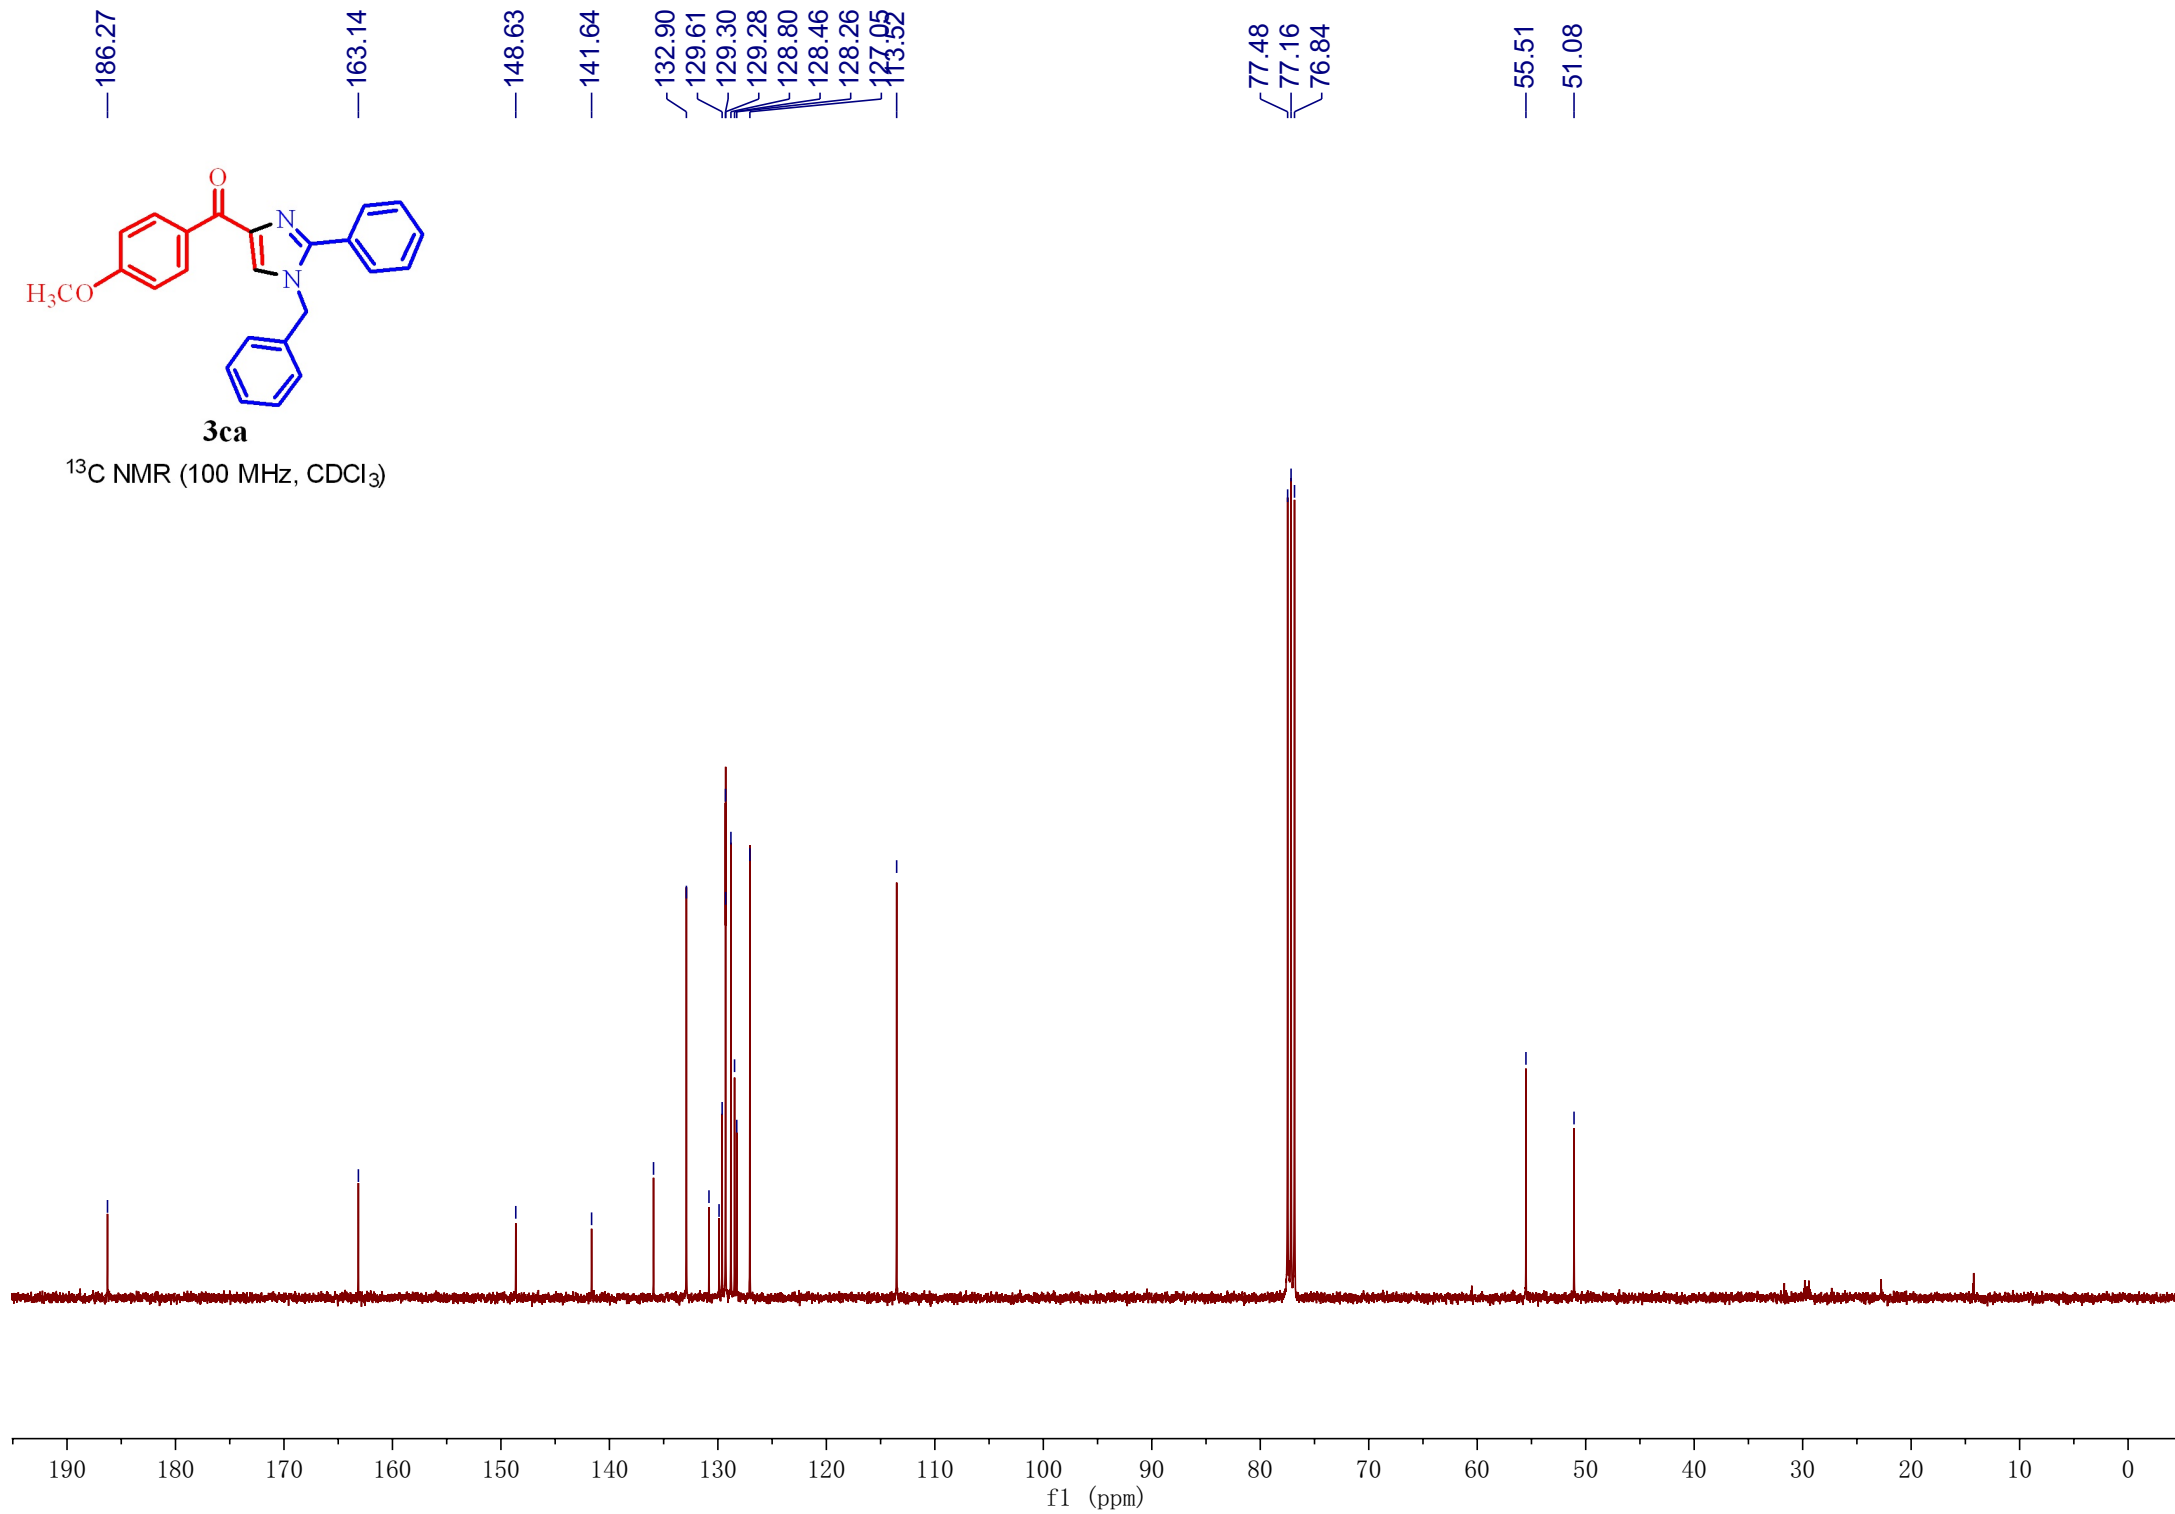

8.386  
8.379  
8.373  
8.368  
8.356  
8.351  
8.345

7.788  
7.622  
7.617  
7.609  
7.598  
7.464  
7.459  
7.449  
7.427  
7.366  
7.352  
7.347  
7.260  
7.124  
7.118  
7.104  
5.254

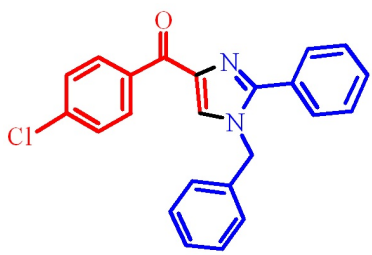

**3da**

<sup>1</sup>H NMR (400 MHz, CDCl<sub>3</sub>)

7.788  
7.622  
7.617  
7.609  
7.606  
7.598  
7.464  
7.459  
7.449  
7.445  
7.432  
7.427  
7.366  
7.352  
7.347  
7.342  
7.260  
7.124  
7.118  
7.104  
7.100

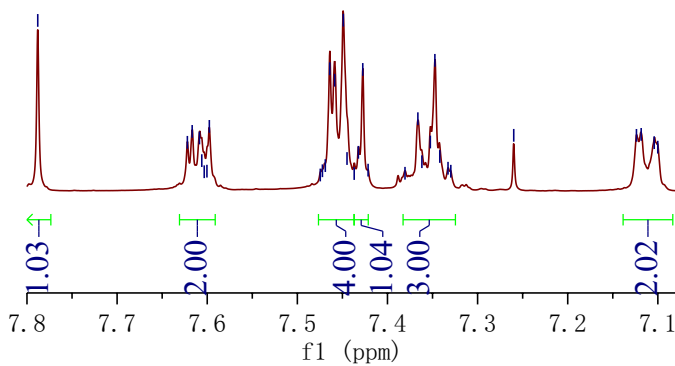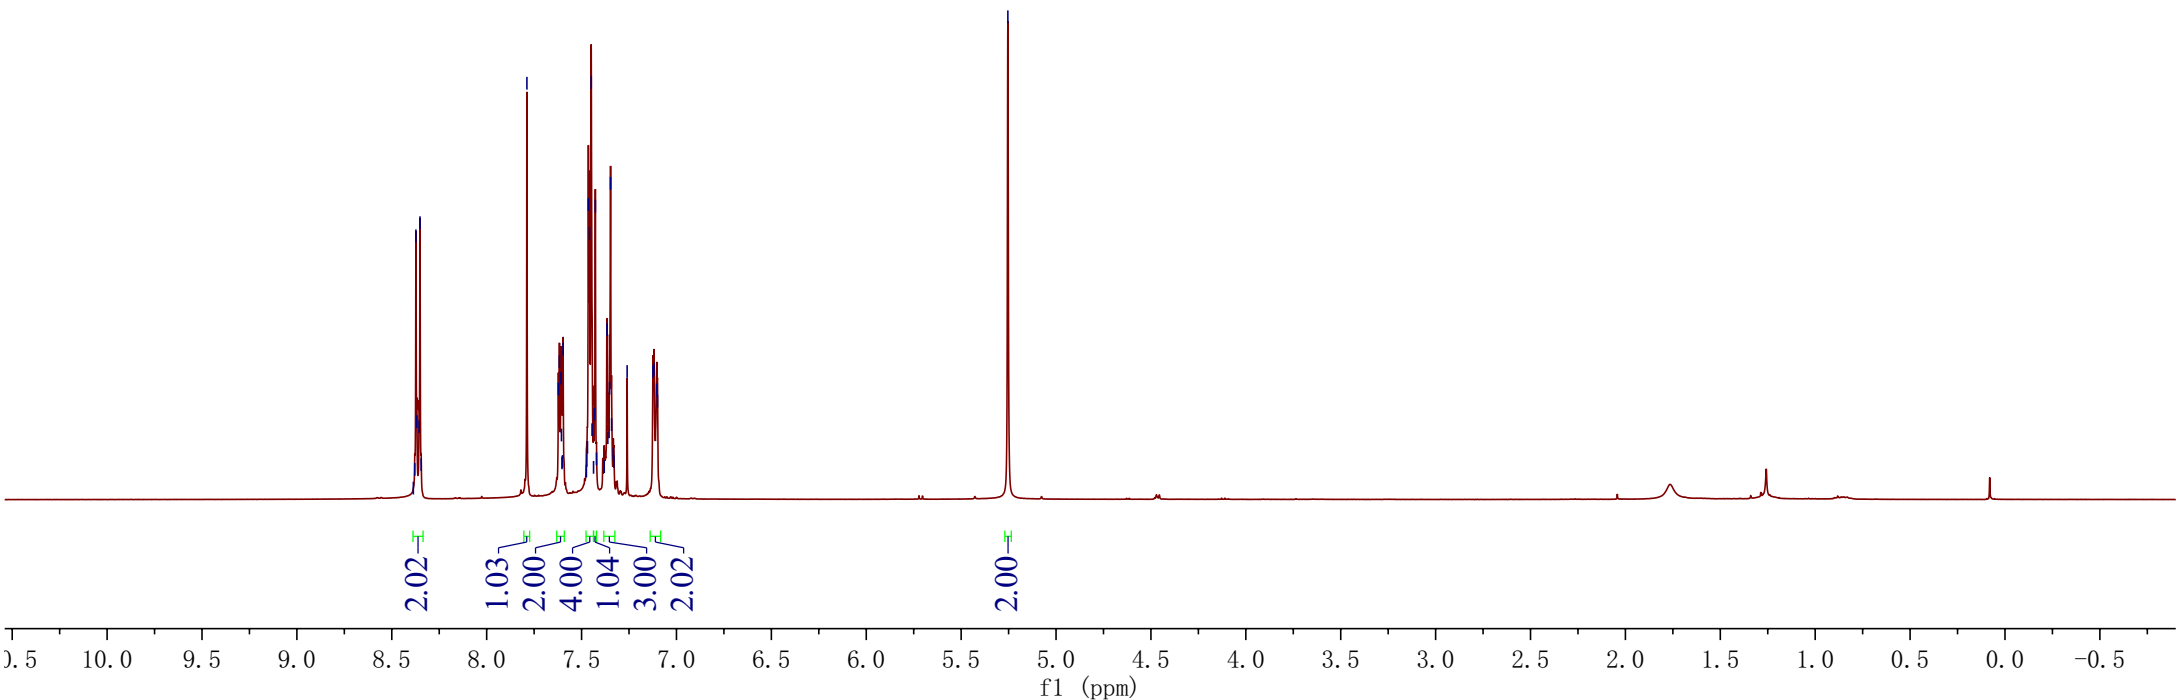

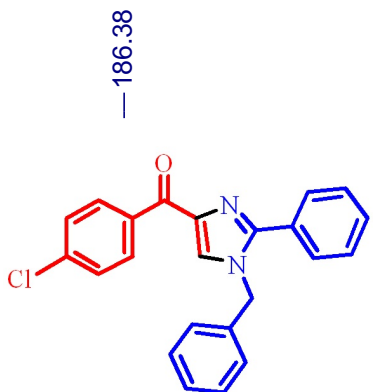

$^{13}\text{C}$  NMR (100 MHz,  $\text{CDCl}_3$ )

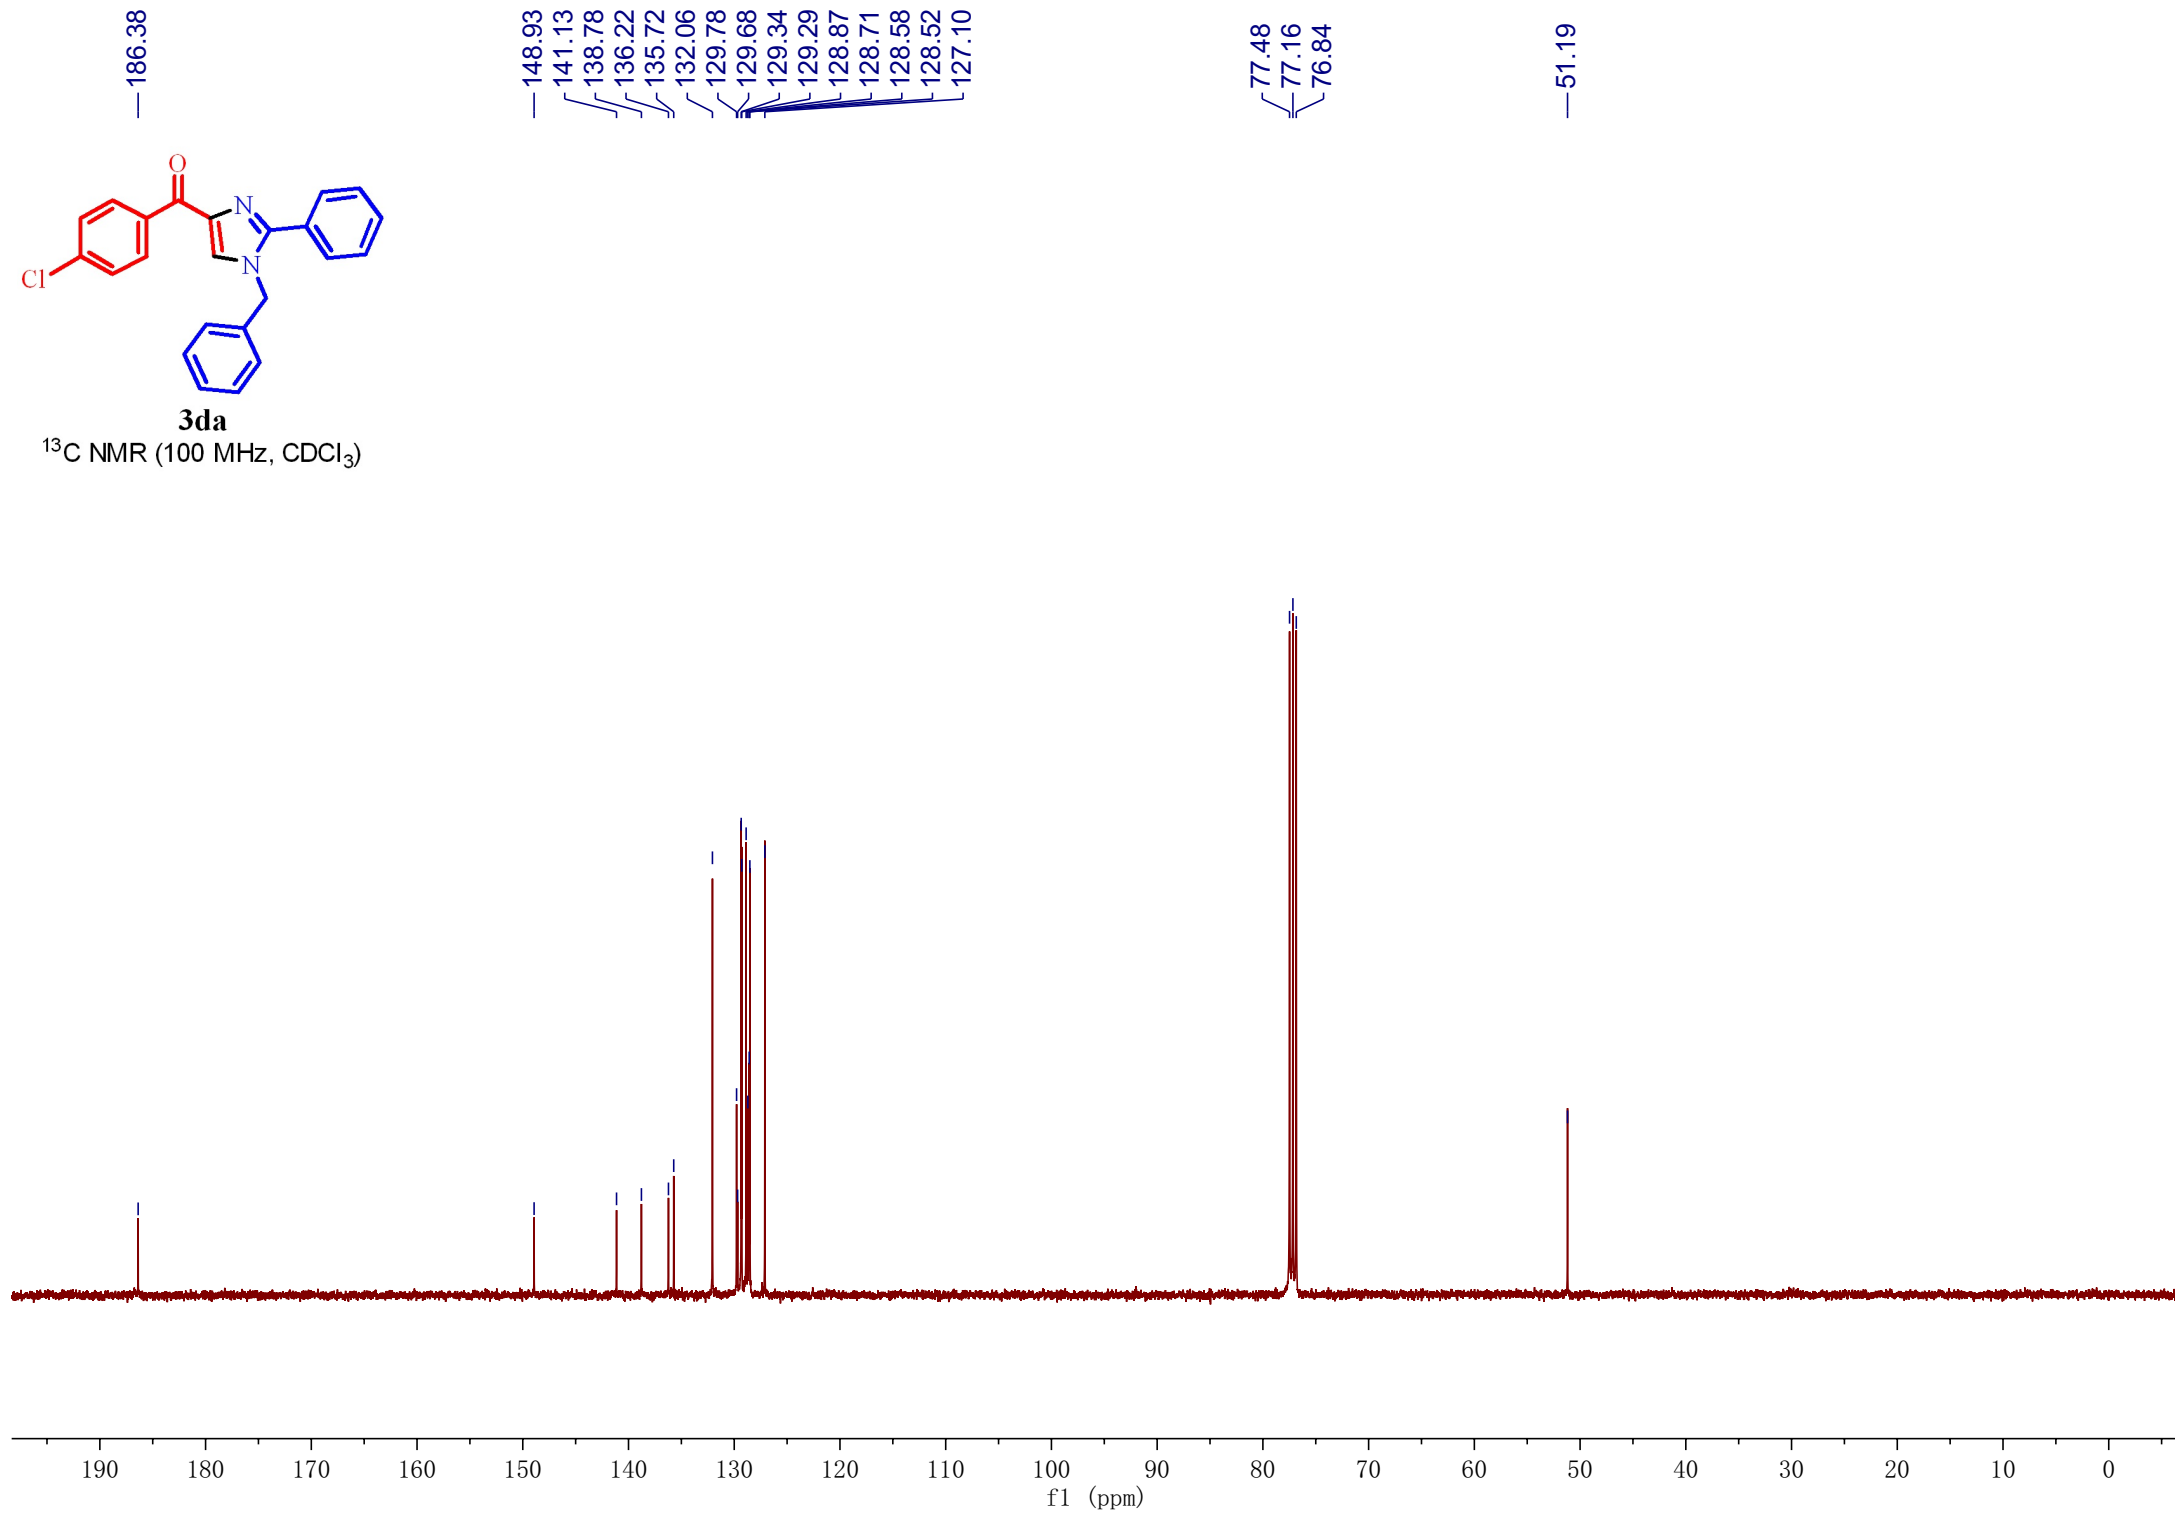

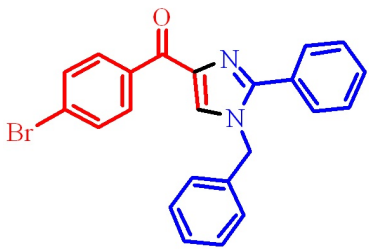

3ea

<sup>1</sup>H NMR (400 MHz, CDCl<sub>3</sub>)

8.284  
8.263  
7.784  
7.614  
7.594  
7.463  
7.458  
7.450  
7.446  
7.388  
7.381  
7.365  
7.347  
7.331  
7.313  
7.260  
7.122  
7.101  
5.252

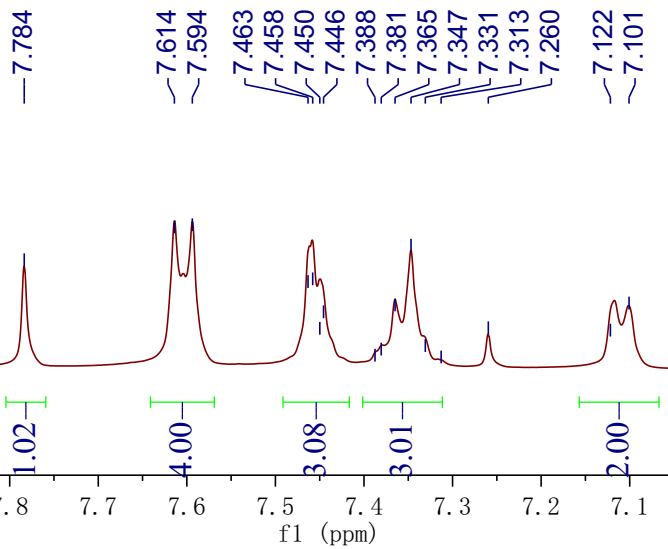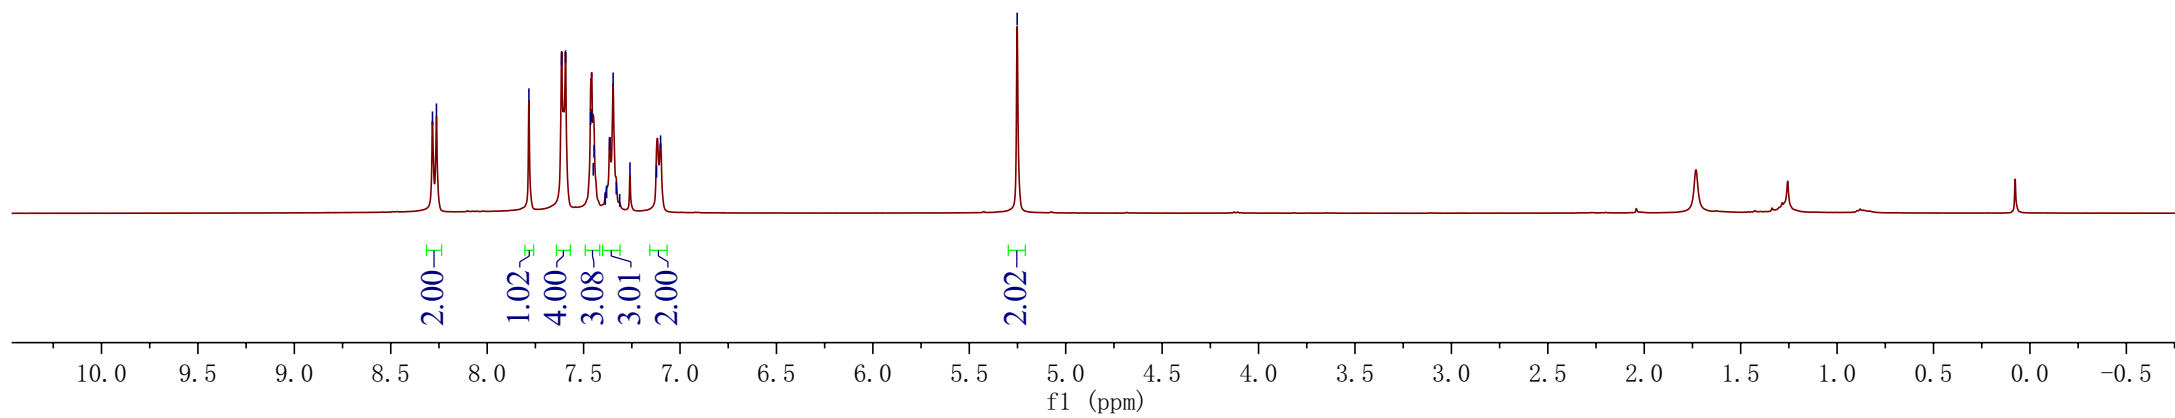



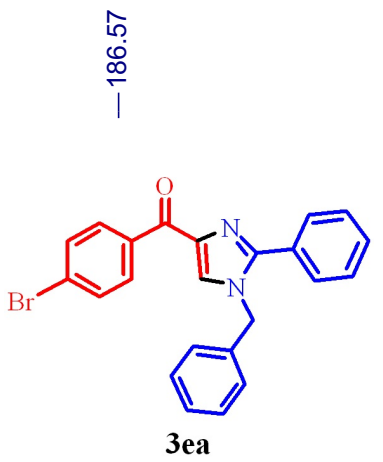

<sup>13</sup>C NMR (100 MHz, CDCl<sub>3</sub>)

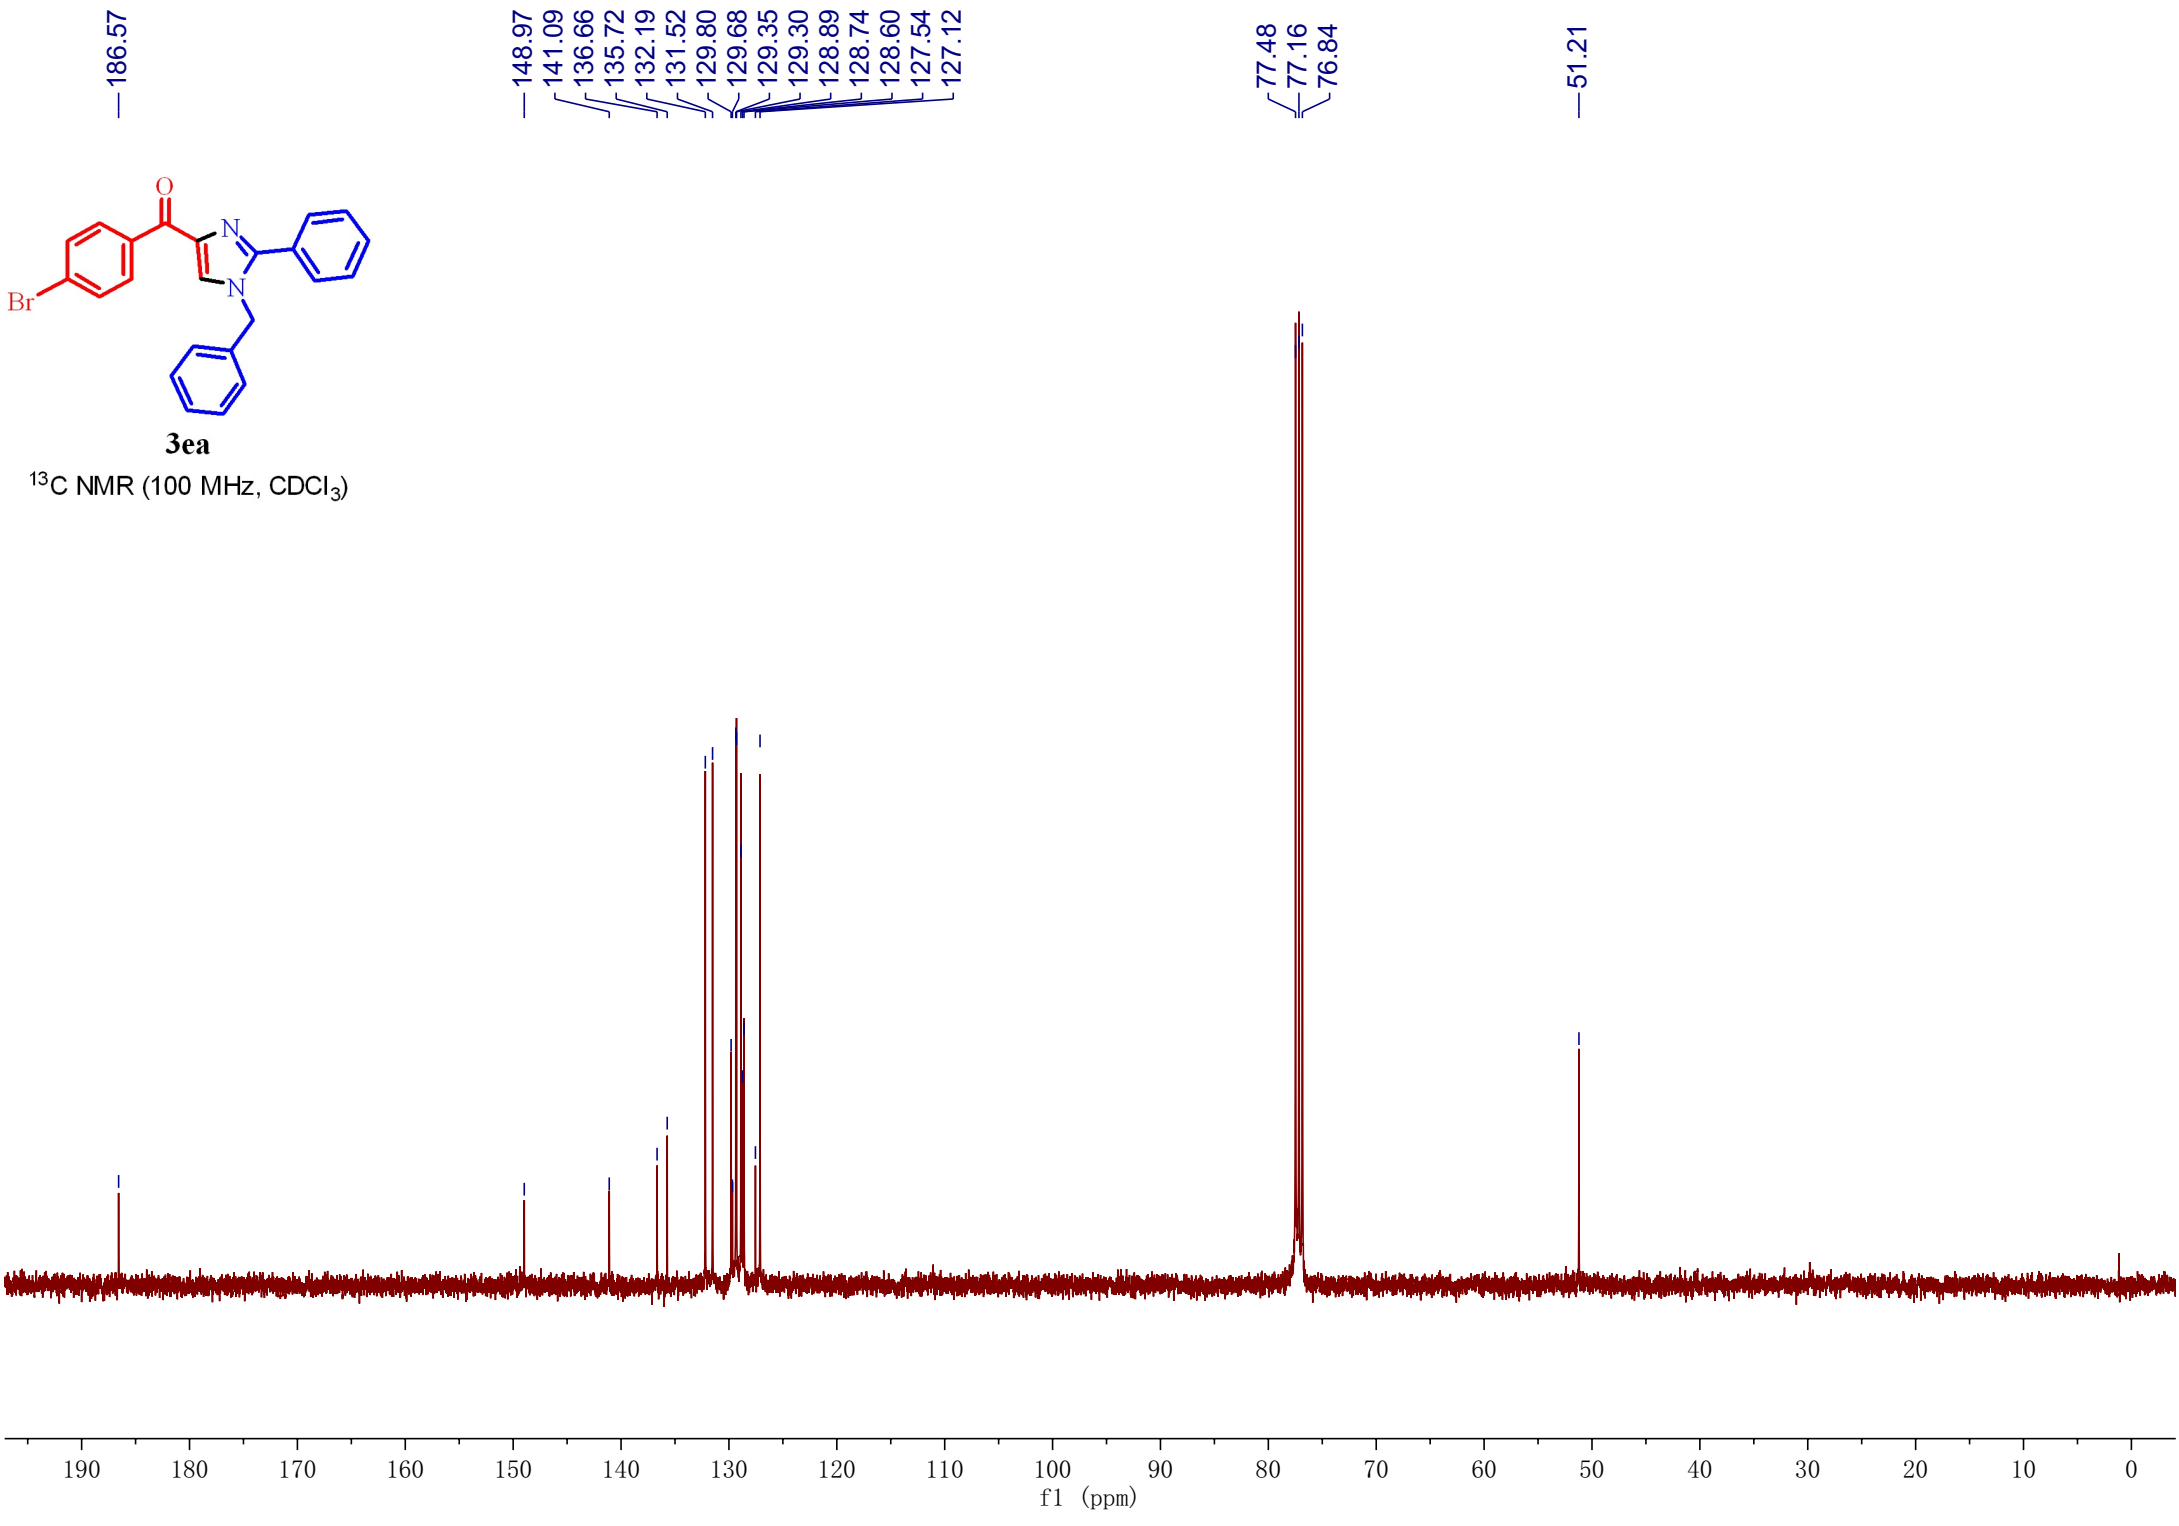

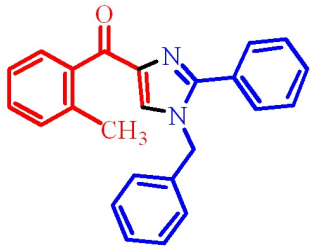

**3fa**

<sup>1</sup>H NMR (400 MHz, CDCl<sub>3</sub>)

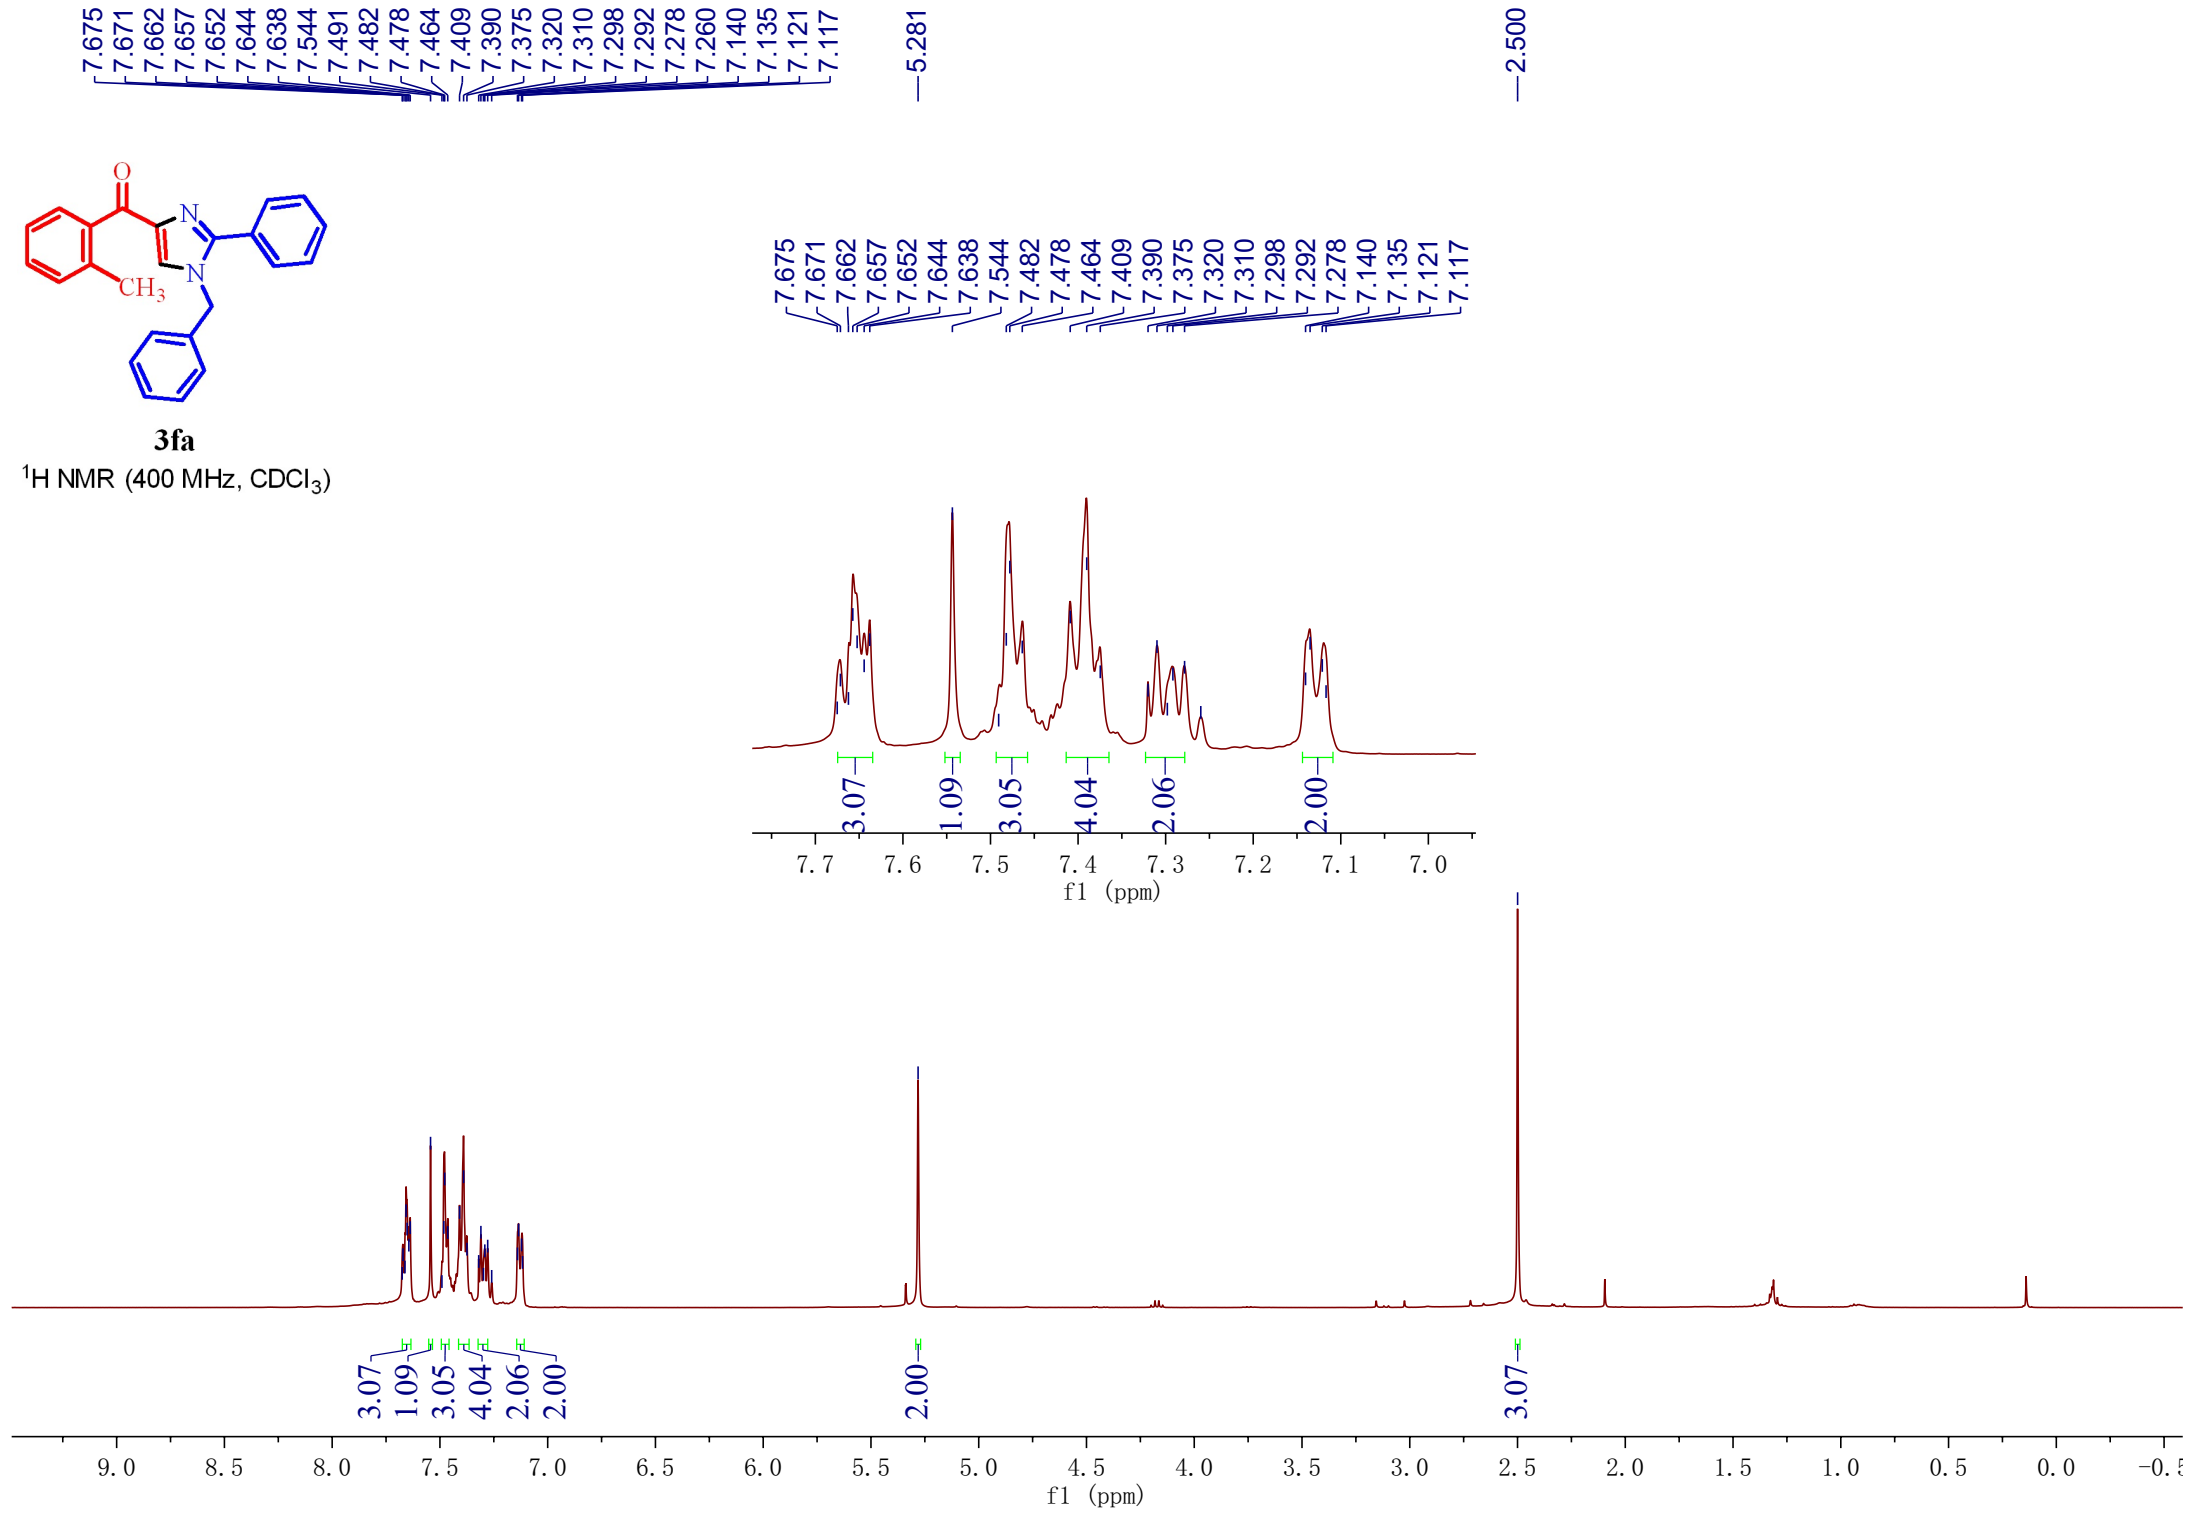

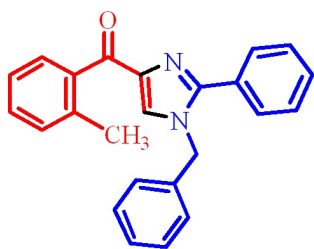

**3fa**

$^{13}\text{C}$  NMR (100 MHz,  $\text{CDCl}_3$ )

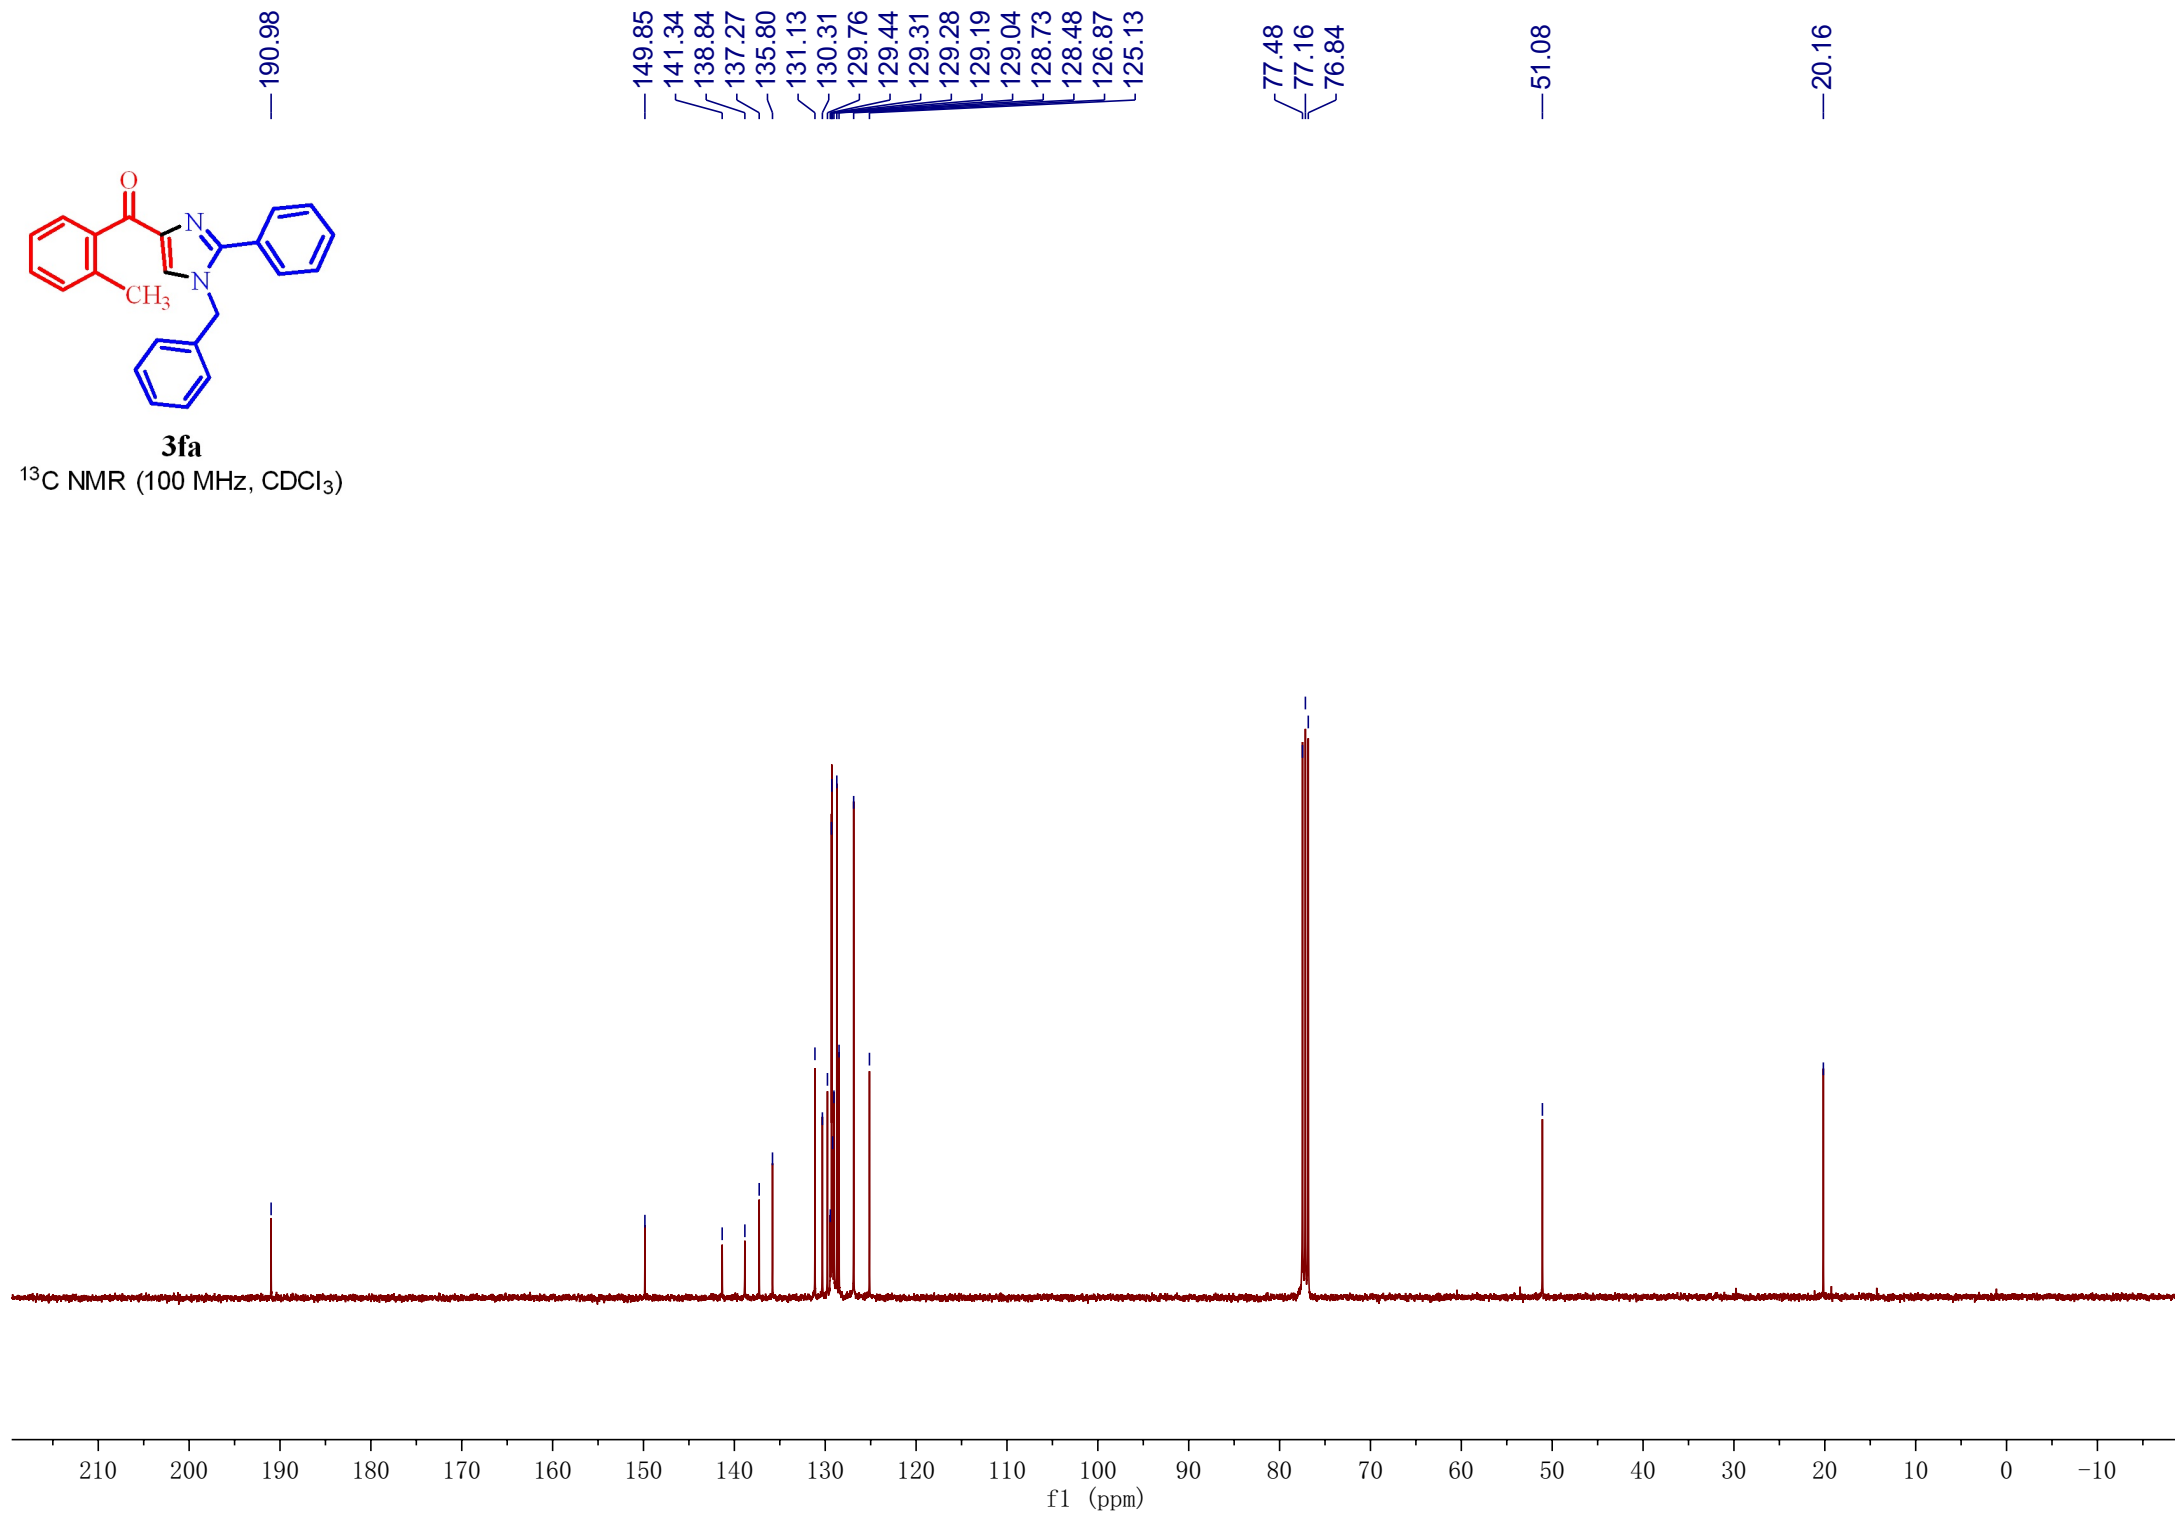

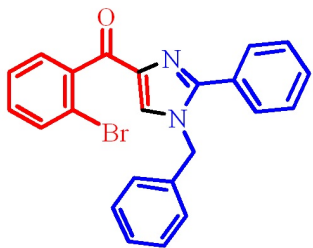

**3ga**

<sup>1</sup>H NMR (400 MHz, CDCl<sub>3</sub>)

8.312  
8.294  
7.750  
7.631  
7.622  
7.612  
7.487  
7.468  
7.458  
7.454  
7.452  
7.367  
7.348  
7.260  
7.126  
7.121  
7.107  
5.265

8.312  
8.294  
7.750  
7.636  
7.631  
7.622  
7.612  
7.487  
7.468  
7.458  
7.454  
7.452  
7.441  
7.367  
7.348  
7.330  
7.260  
7.121  
7.107

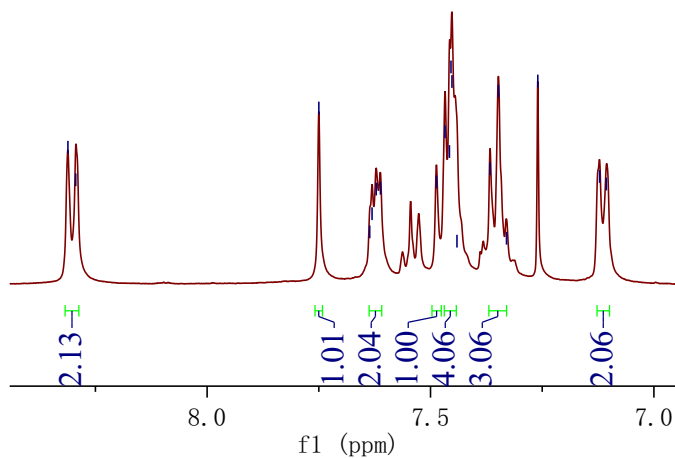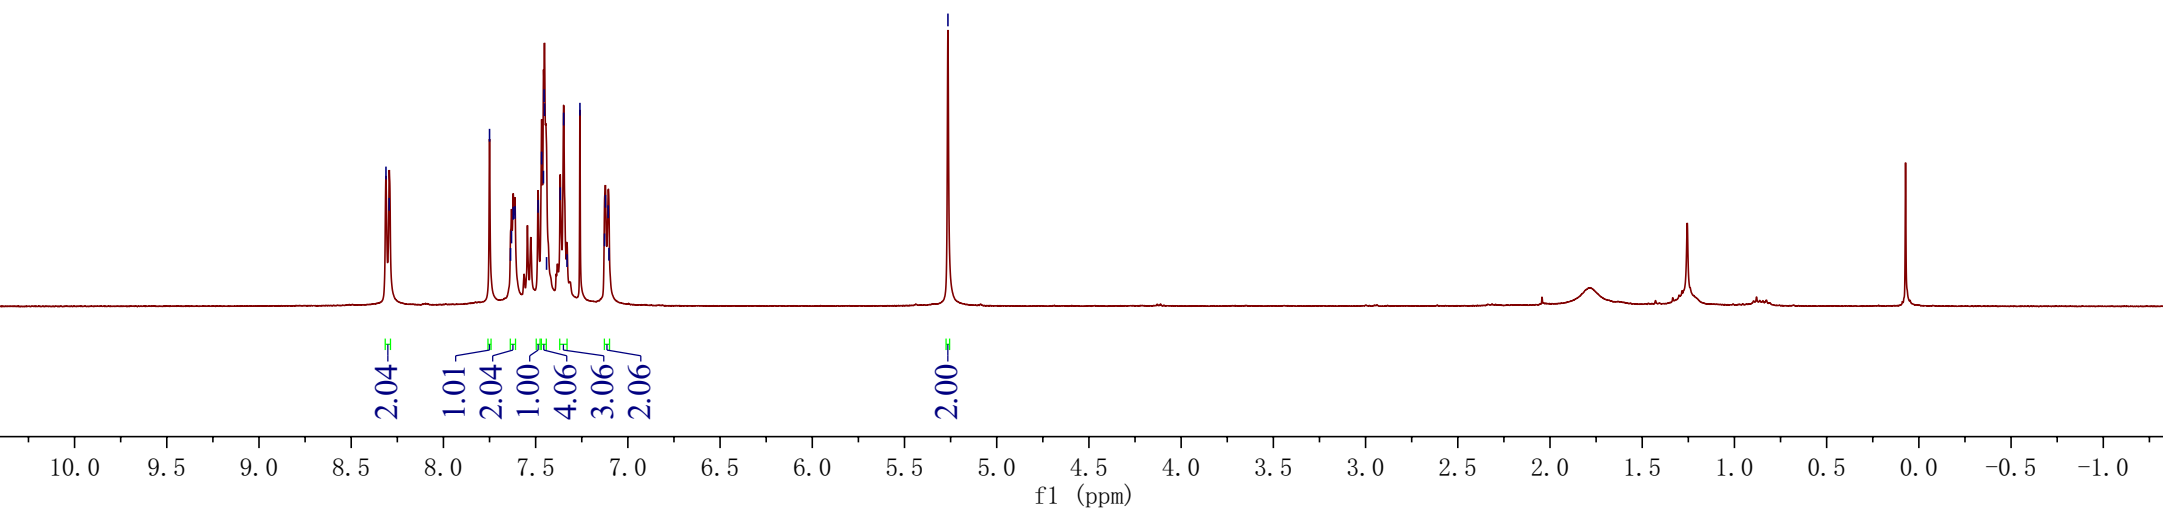

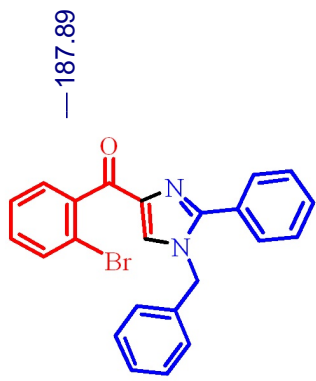

**3ga**

$^{13}\text{C}$  NMR (100 MHz,  $\text{CDCl}_3$ )

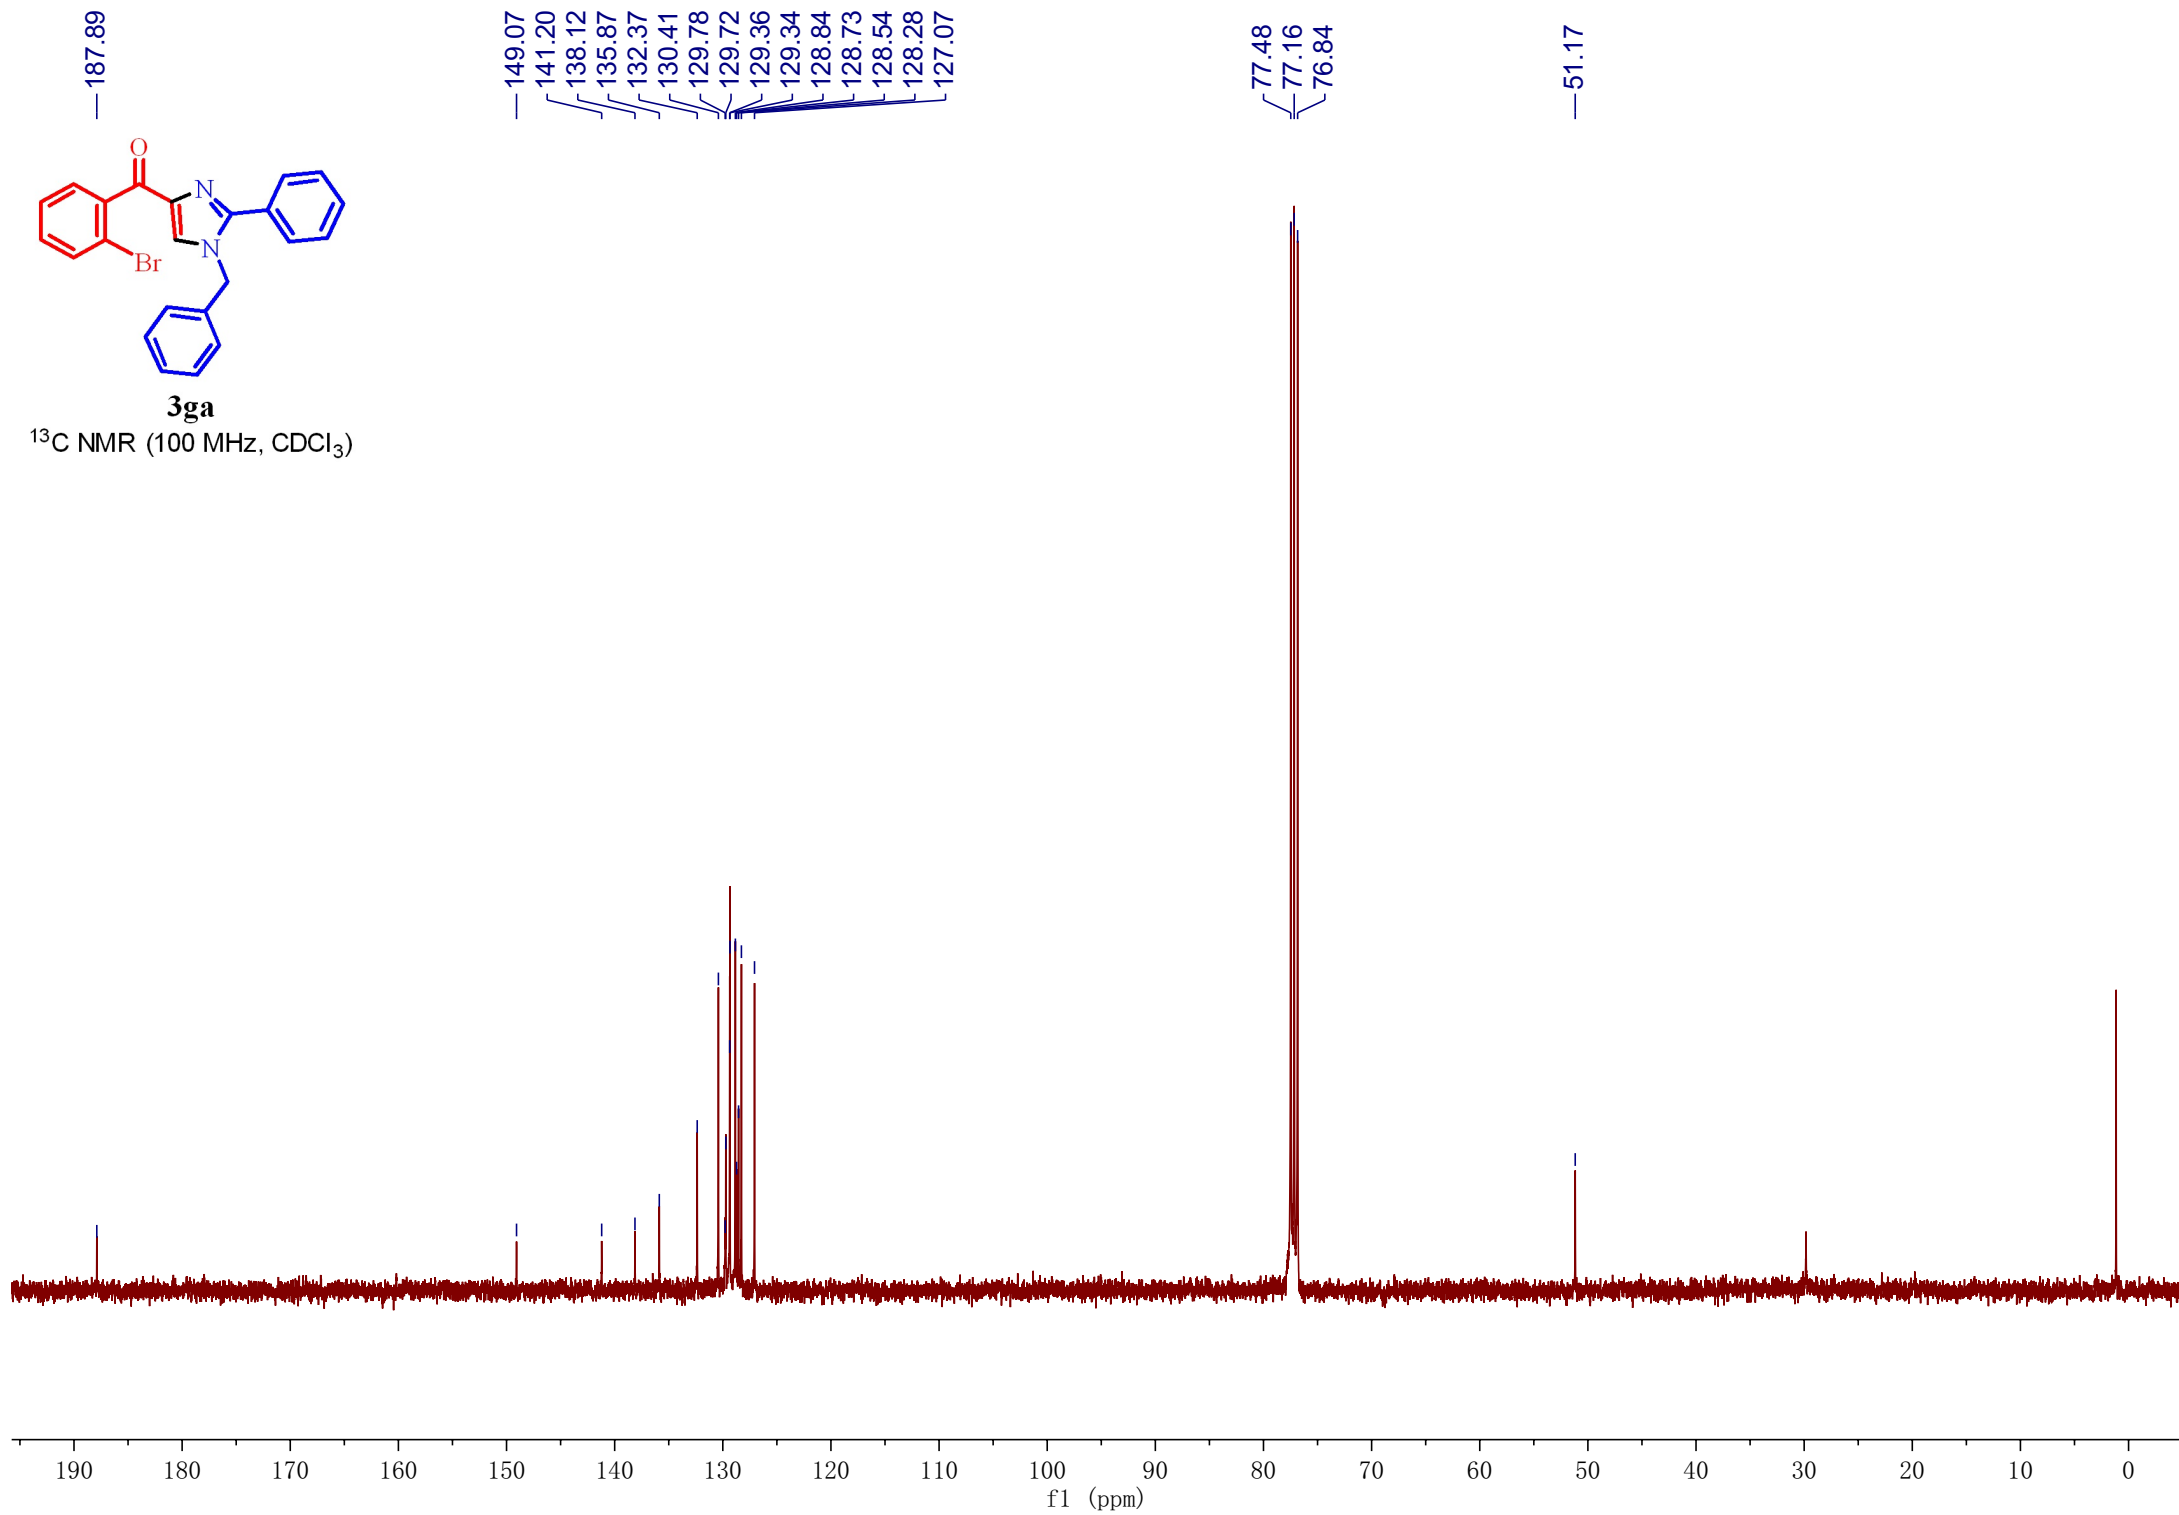

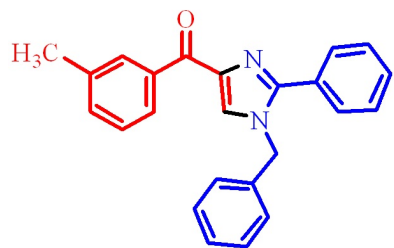

**3ha**

$^1\text{H}$  NMR (400 MHz,  $\text{CDCl}_3$ )

8.105  
8.100  
8.092  
8.089  
8.082  
8.078  
8.016

7.708  
7.634  
7.628  
7.619  
7.609  
7.455  
7.449  
7.441  
7.437  
7.364  
7.360  
7.357  
7.346  
7.260  
7.124  
7.119  
7.104  
5.261

7.708  
7.634  
7.628  
7.619  
7.611  
7.609  
7.455  
7.449  
7.364  
7.360  
7.346  
7.260  
7.124  
7.119  
7.104  
7.100

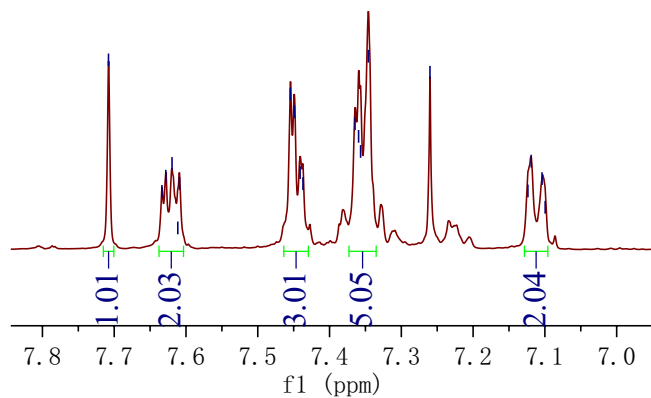

—2.416

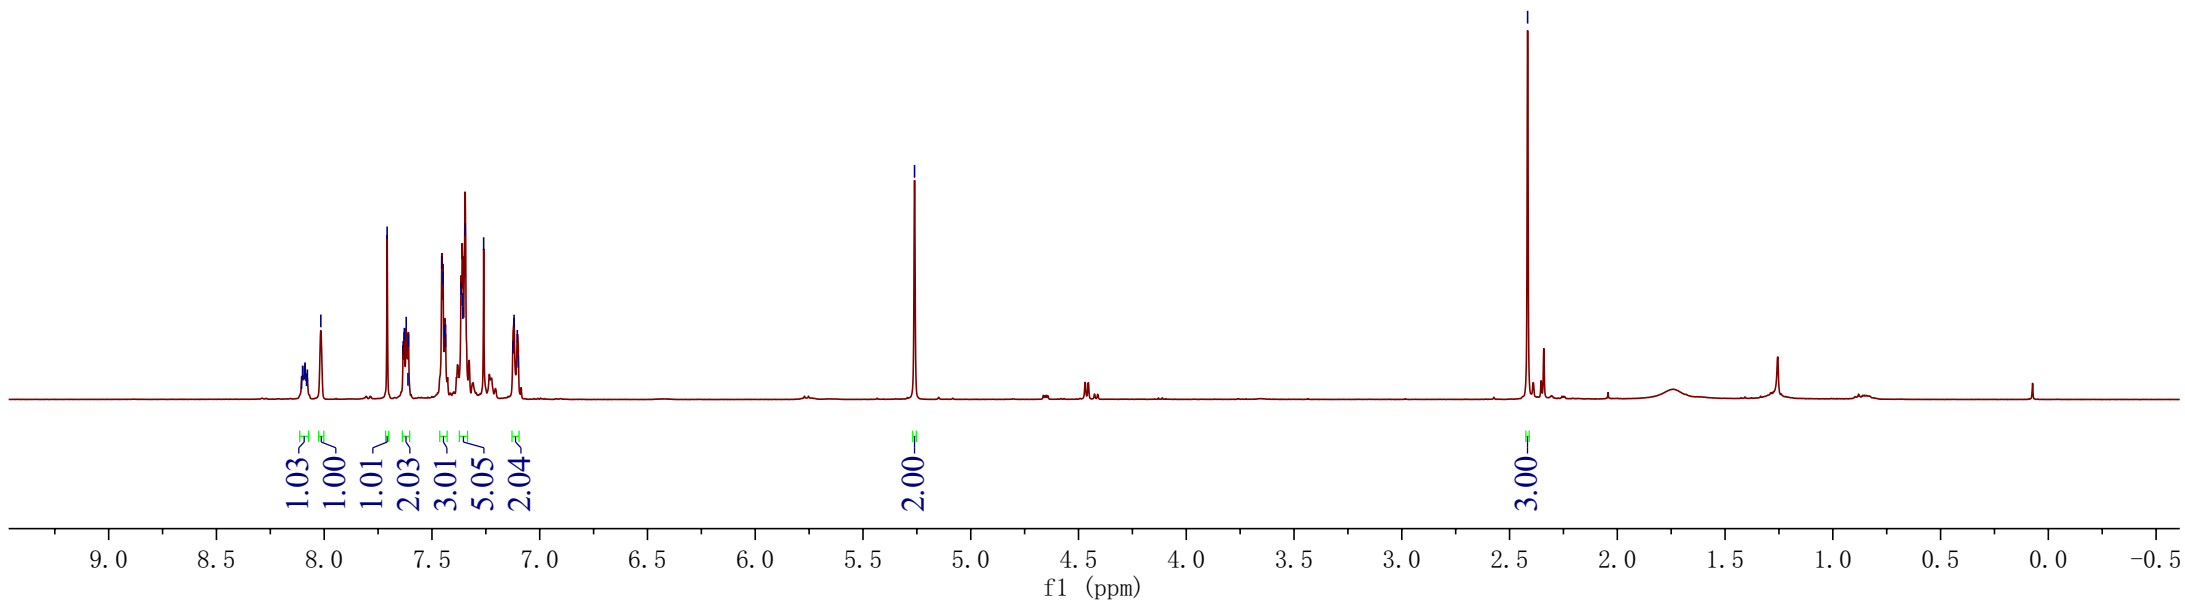

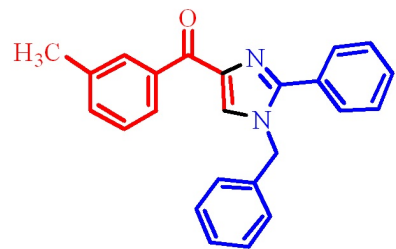

**3ha**

$^{13}\text{C}$  NMR (100 MHz,  $\text{CDCl}_3$ )

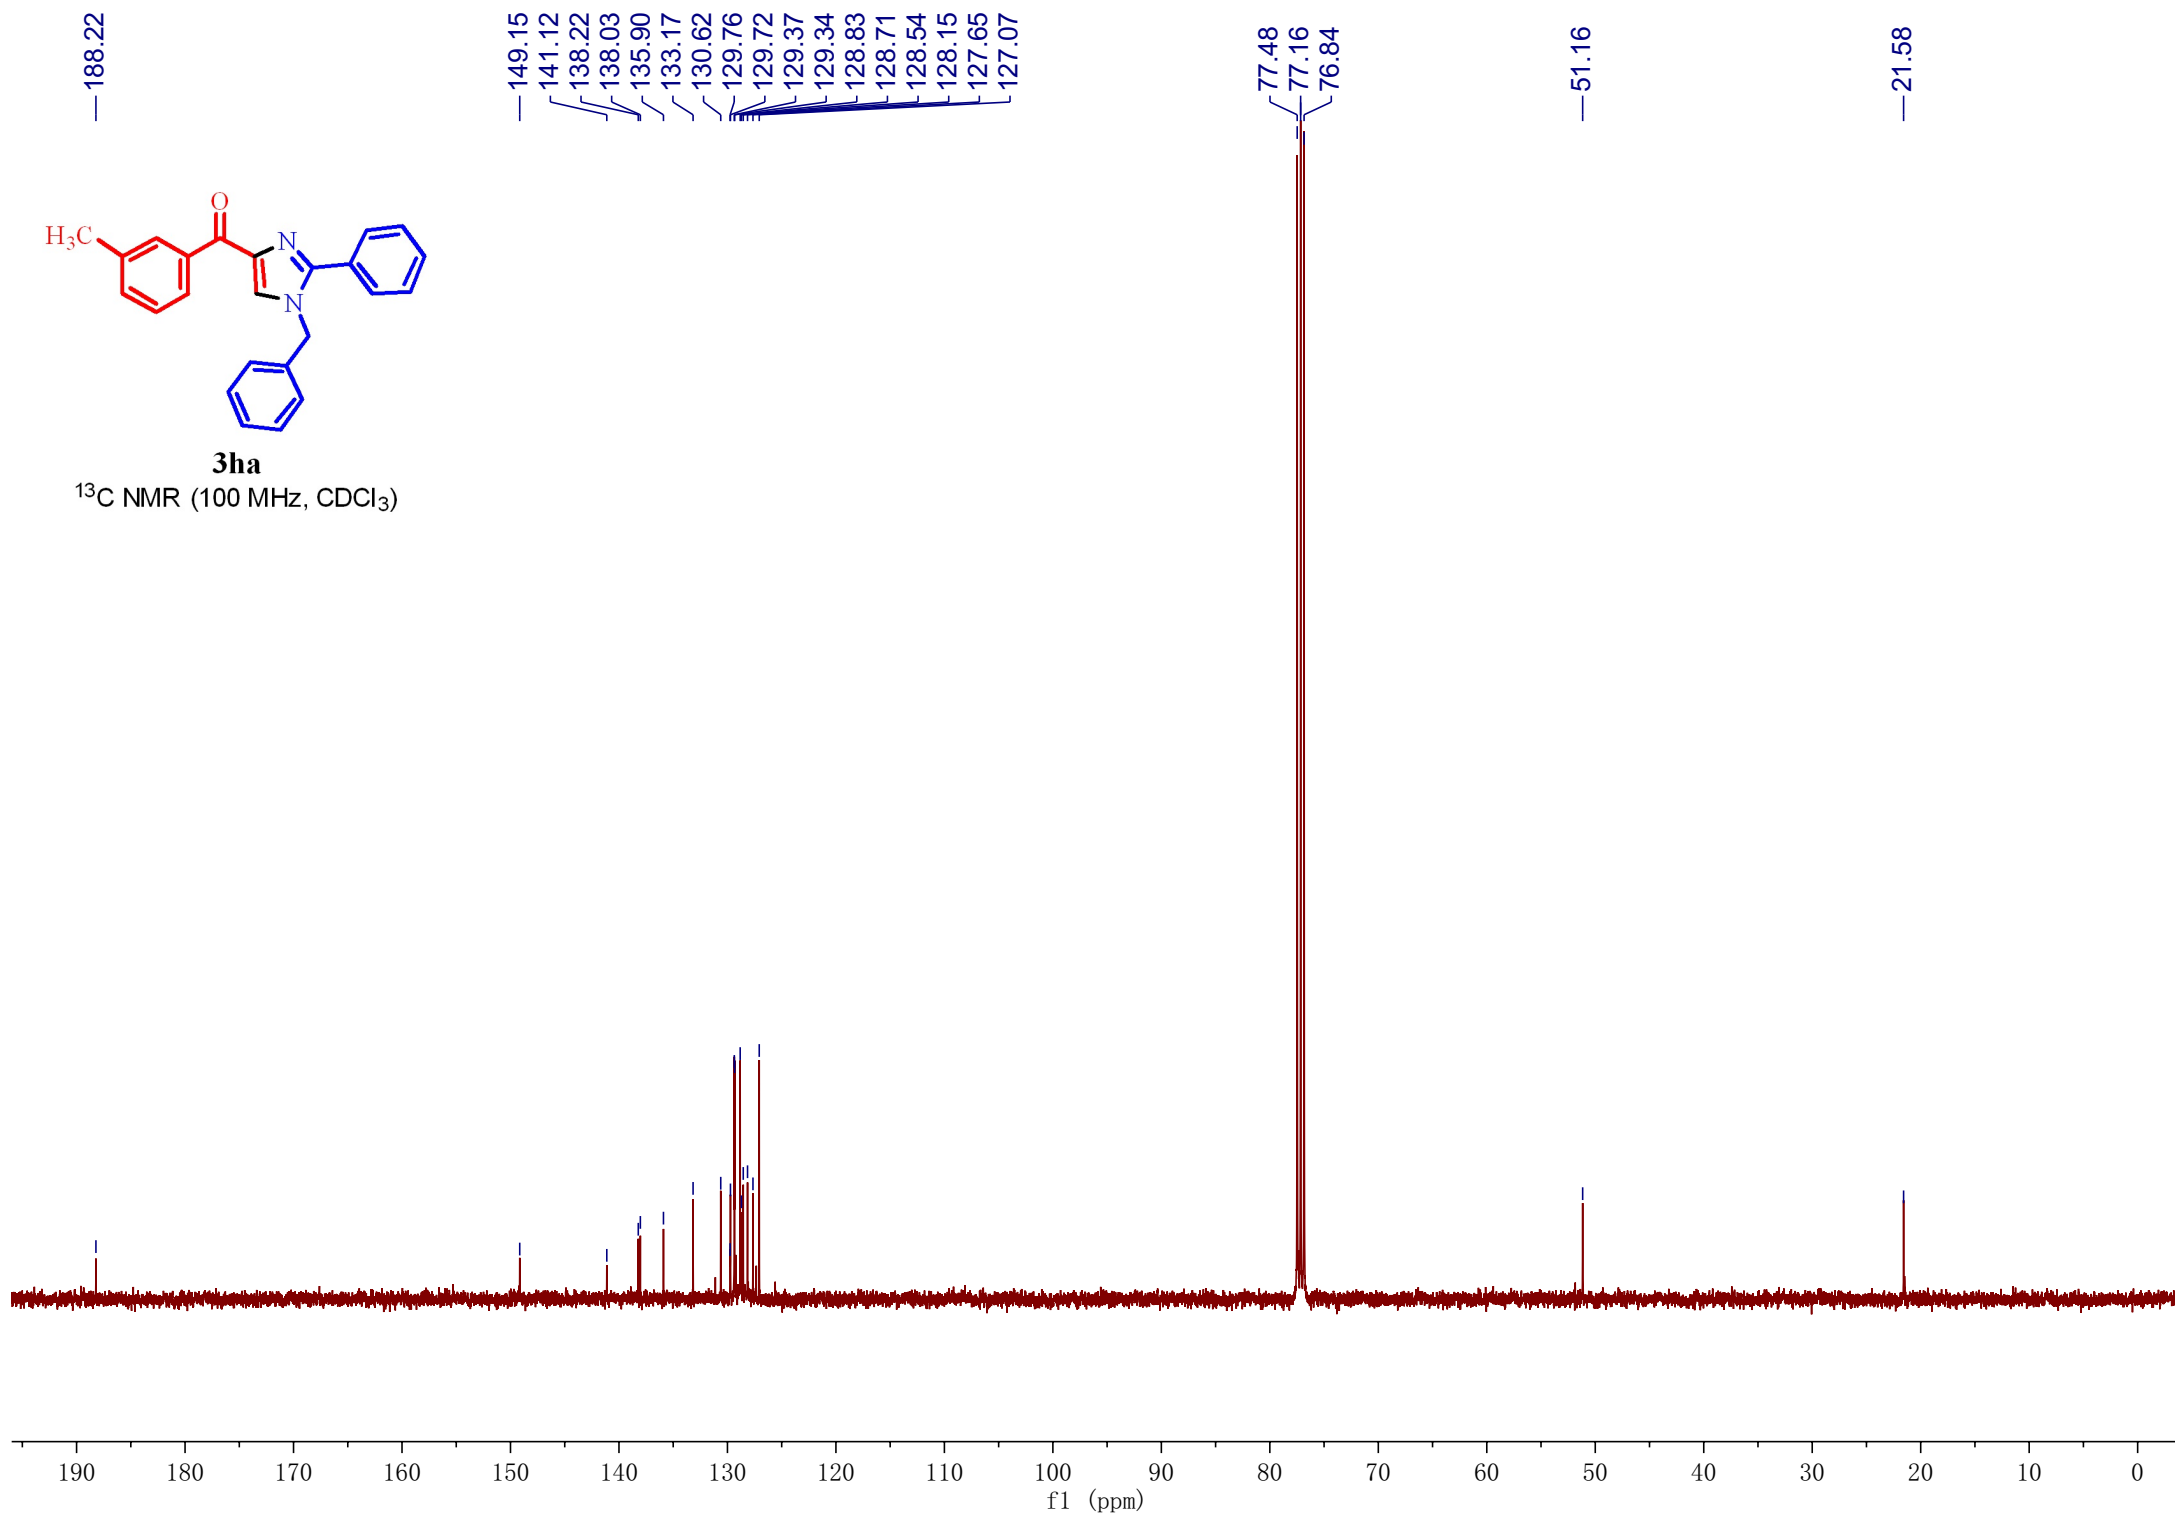

8.311  
8.277  
8.257  
7.777  
7.631  
7.626  
7.618  
7.607  
7.469  
7.464  
7.456  
7.452  
7.427  
7.407  
7.388  
7.373  
7.354  
7.260  
7.127  
7.122  
7.108  
7.104  
5.284

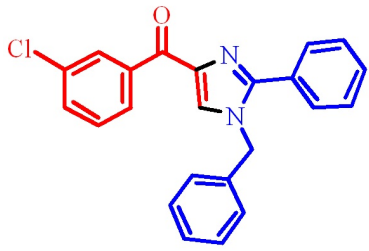

**3ia**

<sup>1</sup>H NMR (400 MHz, CDCl<sub>3</sub>)

7.777  
7.631  
7.626  
7.618  
7.607  
7.469  
7.464  
7.456  
7.452  
7.427  
7.407  
7.388  
7.373  
7.359  
7.354  
7.260  
7.127  
7.122  
7.108  
7.104

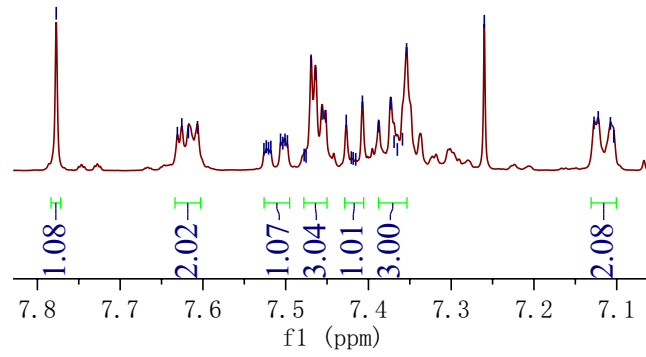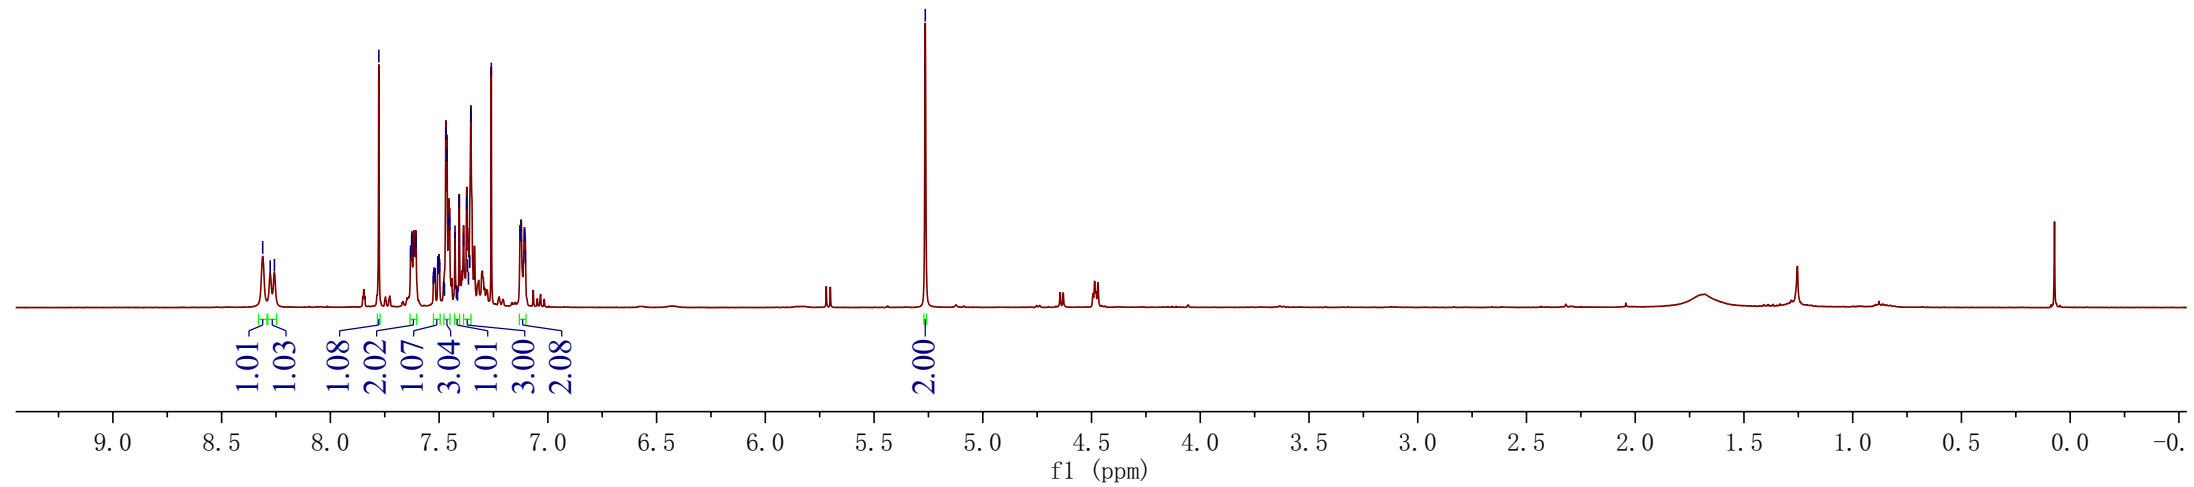



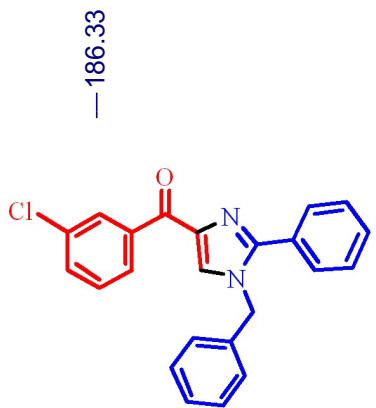

**3ia**

$^{13}\text{C}$  NMR (100 MHz,  $\text{CDCl}_3$ )

149.15  
140.85  
139.53  
135.70  
134.40  
132.35  
130.46  
129.84  
129.61  
129.39  
129.33  
128.99  
128.91  
128.73  
128.64  
127.13

77.48  
77.16  
76.84

51.25

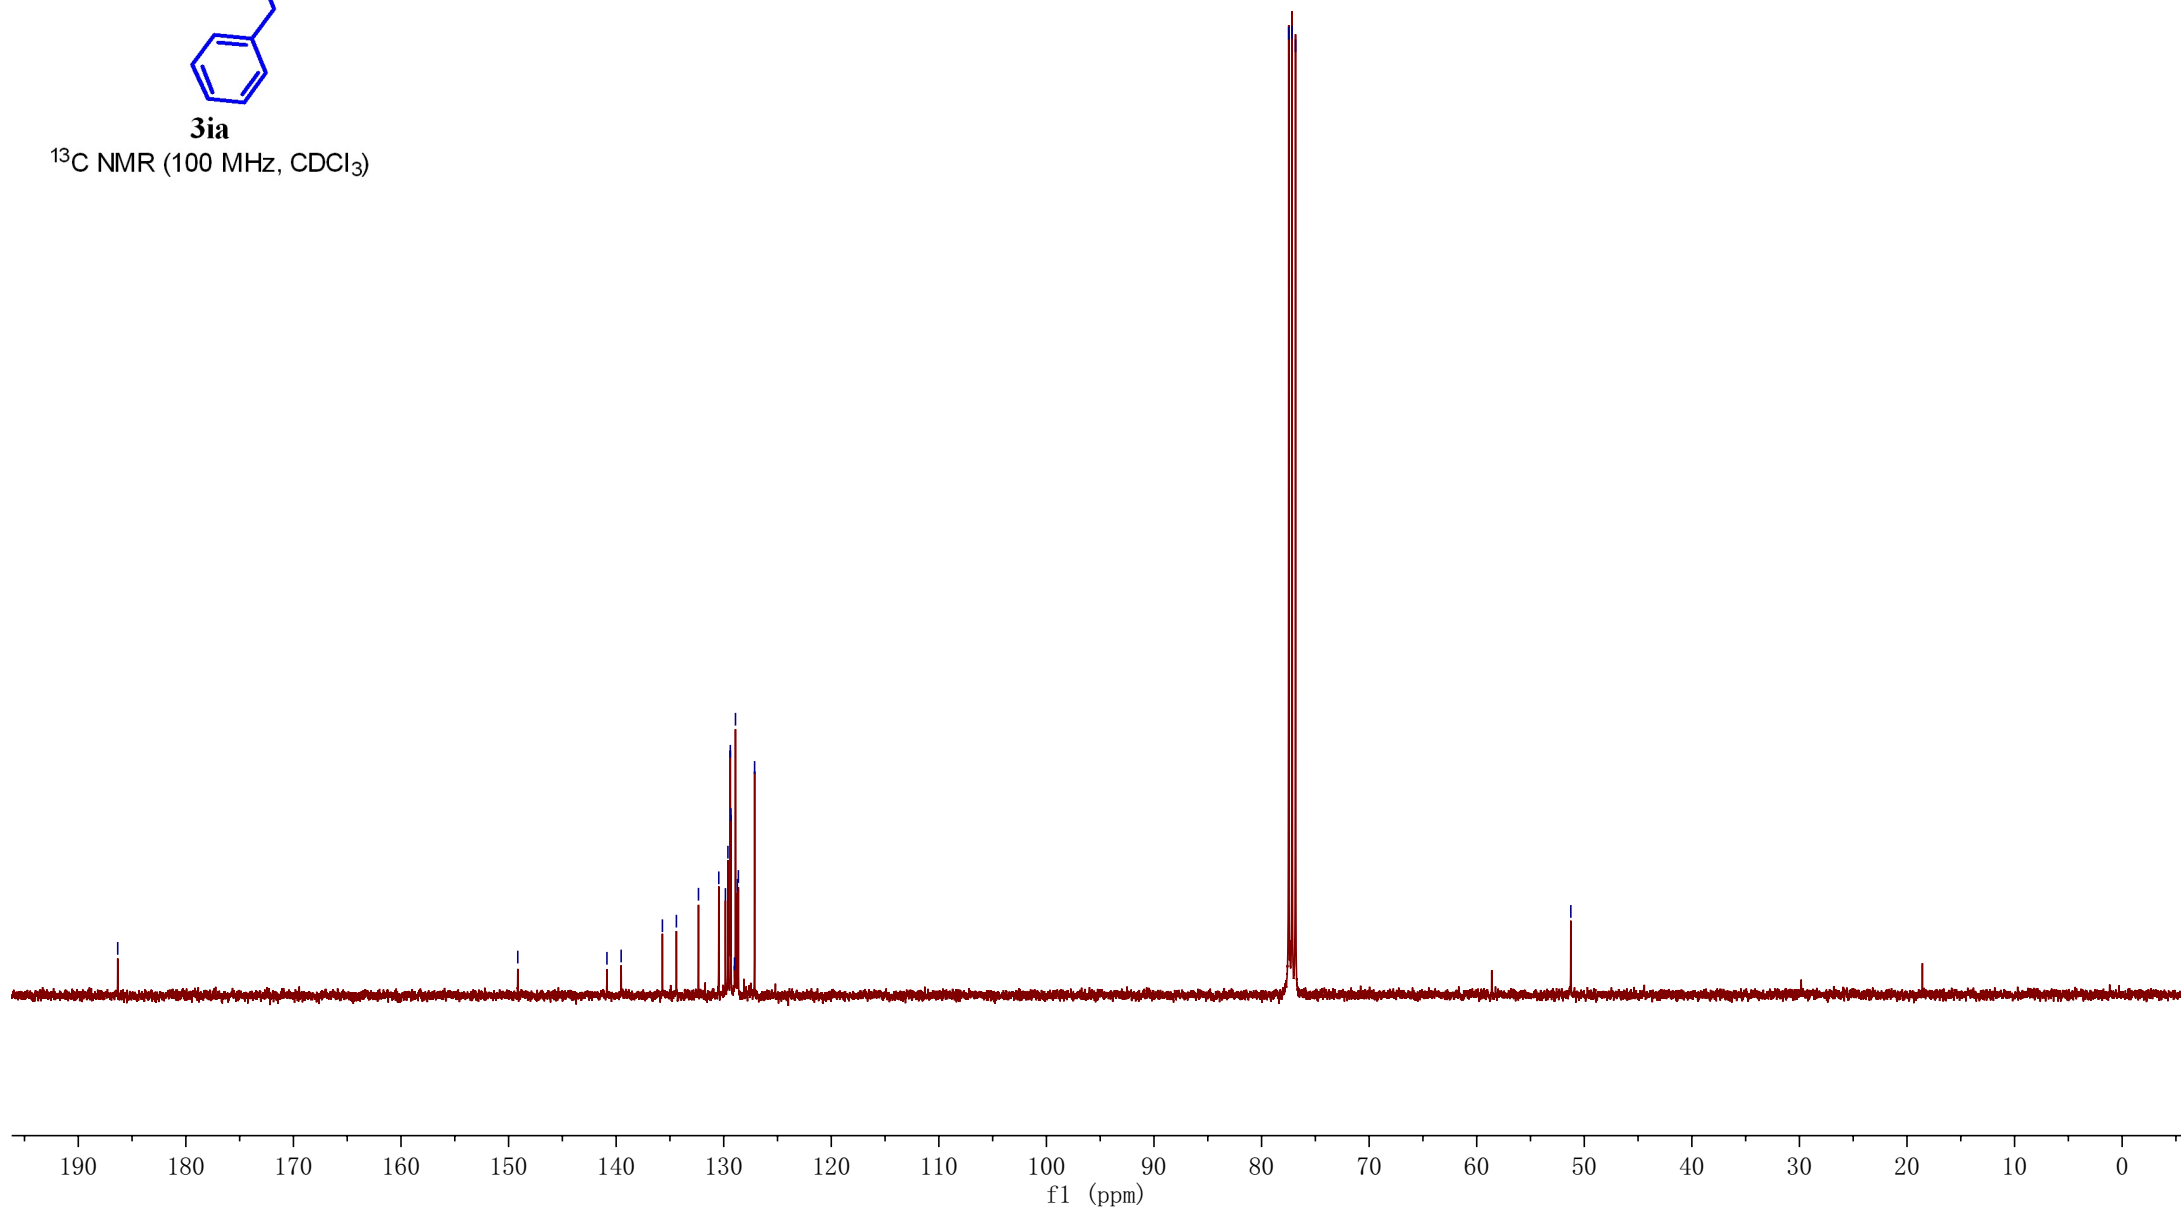

8.271  
8.266  
8.262  
8.250  
8.245  
8.240

7.947  
7.754  
7.628  
7.622  
7.612  
7.603  
7.451  
7.445  
7.437  
7.434  
7.360  
7.342  
7.339  
7.334  
7.260  
7.130  
7.125  
7.110  
6.941  
6.920

3.946  
3.939

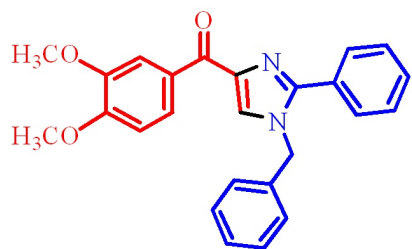

**3ja**

<sup>1</sup>H NMR (400 MHz, CDCl<sub>3</sub>)

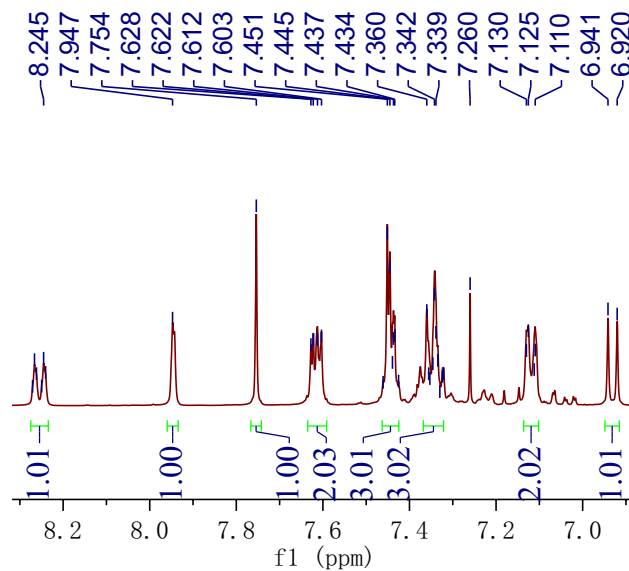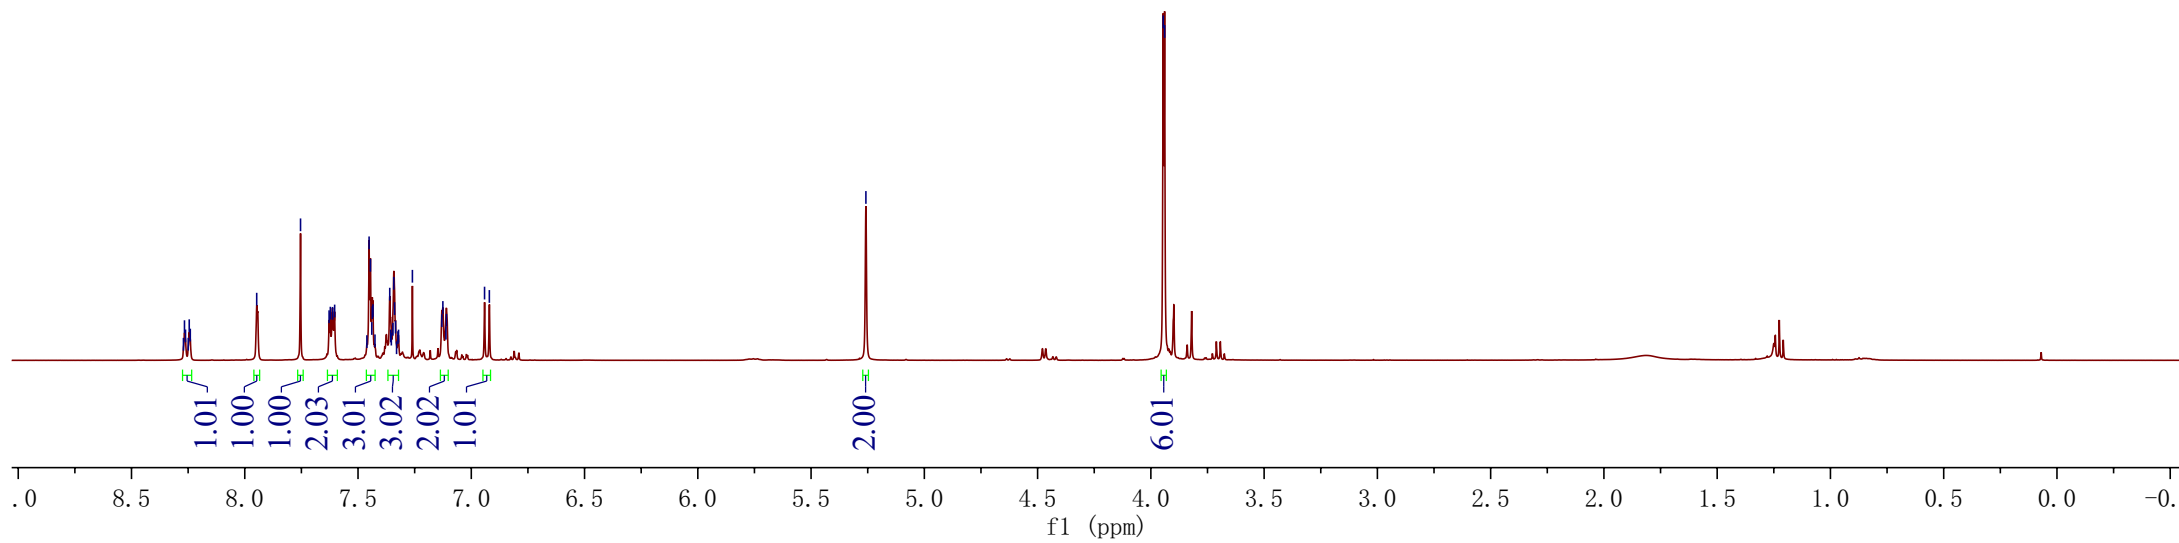

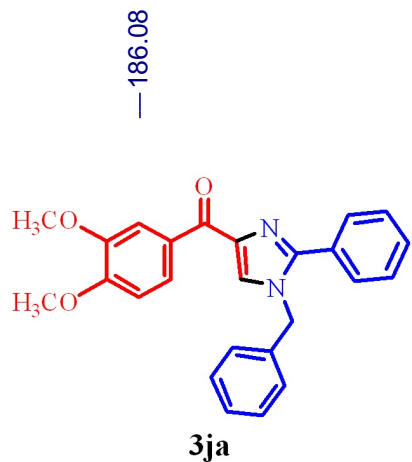

<sup>13</sup>C NMR (100 MHz, CDCl<sub>3</sub>)

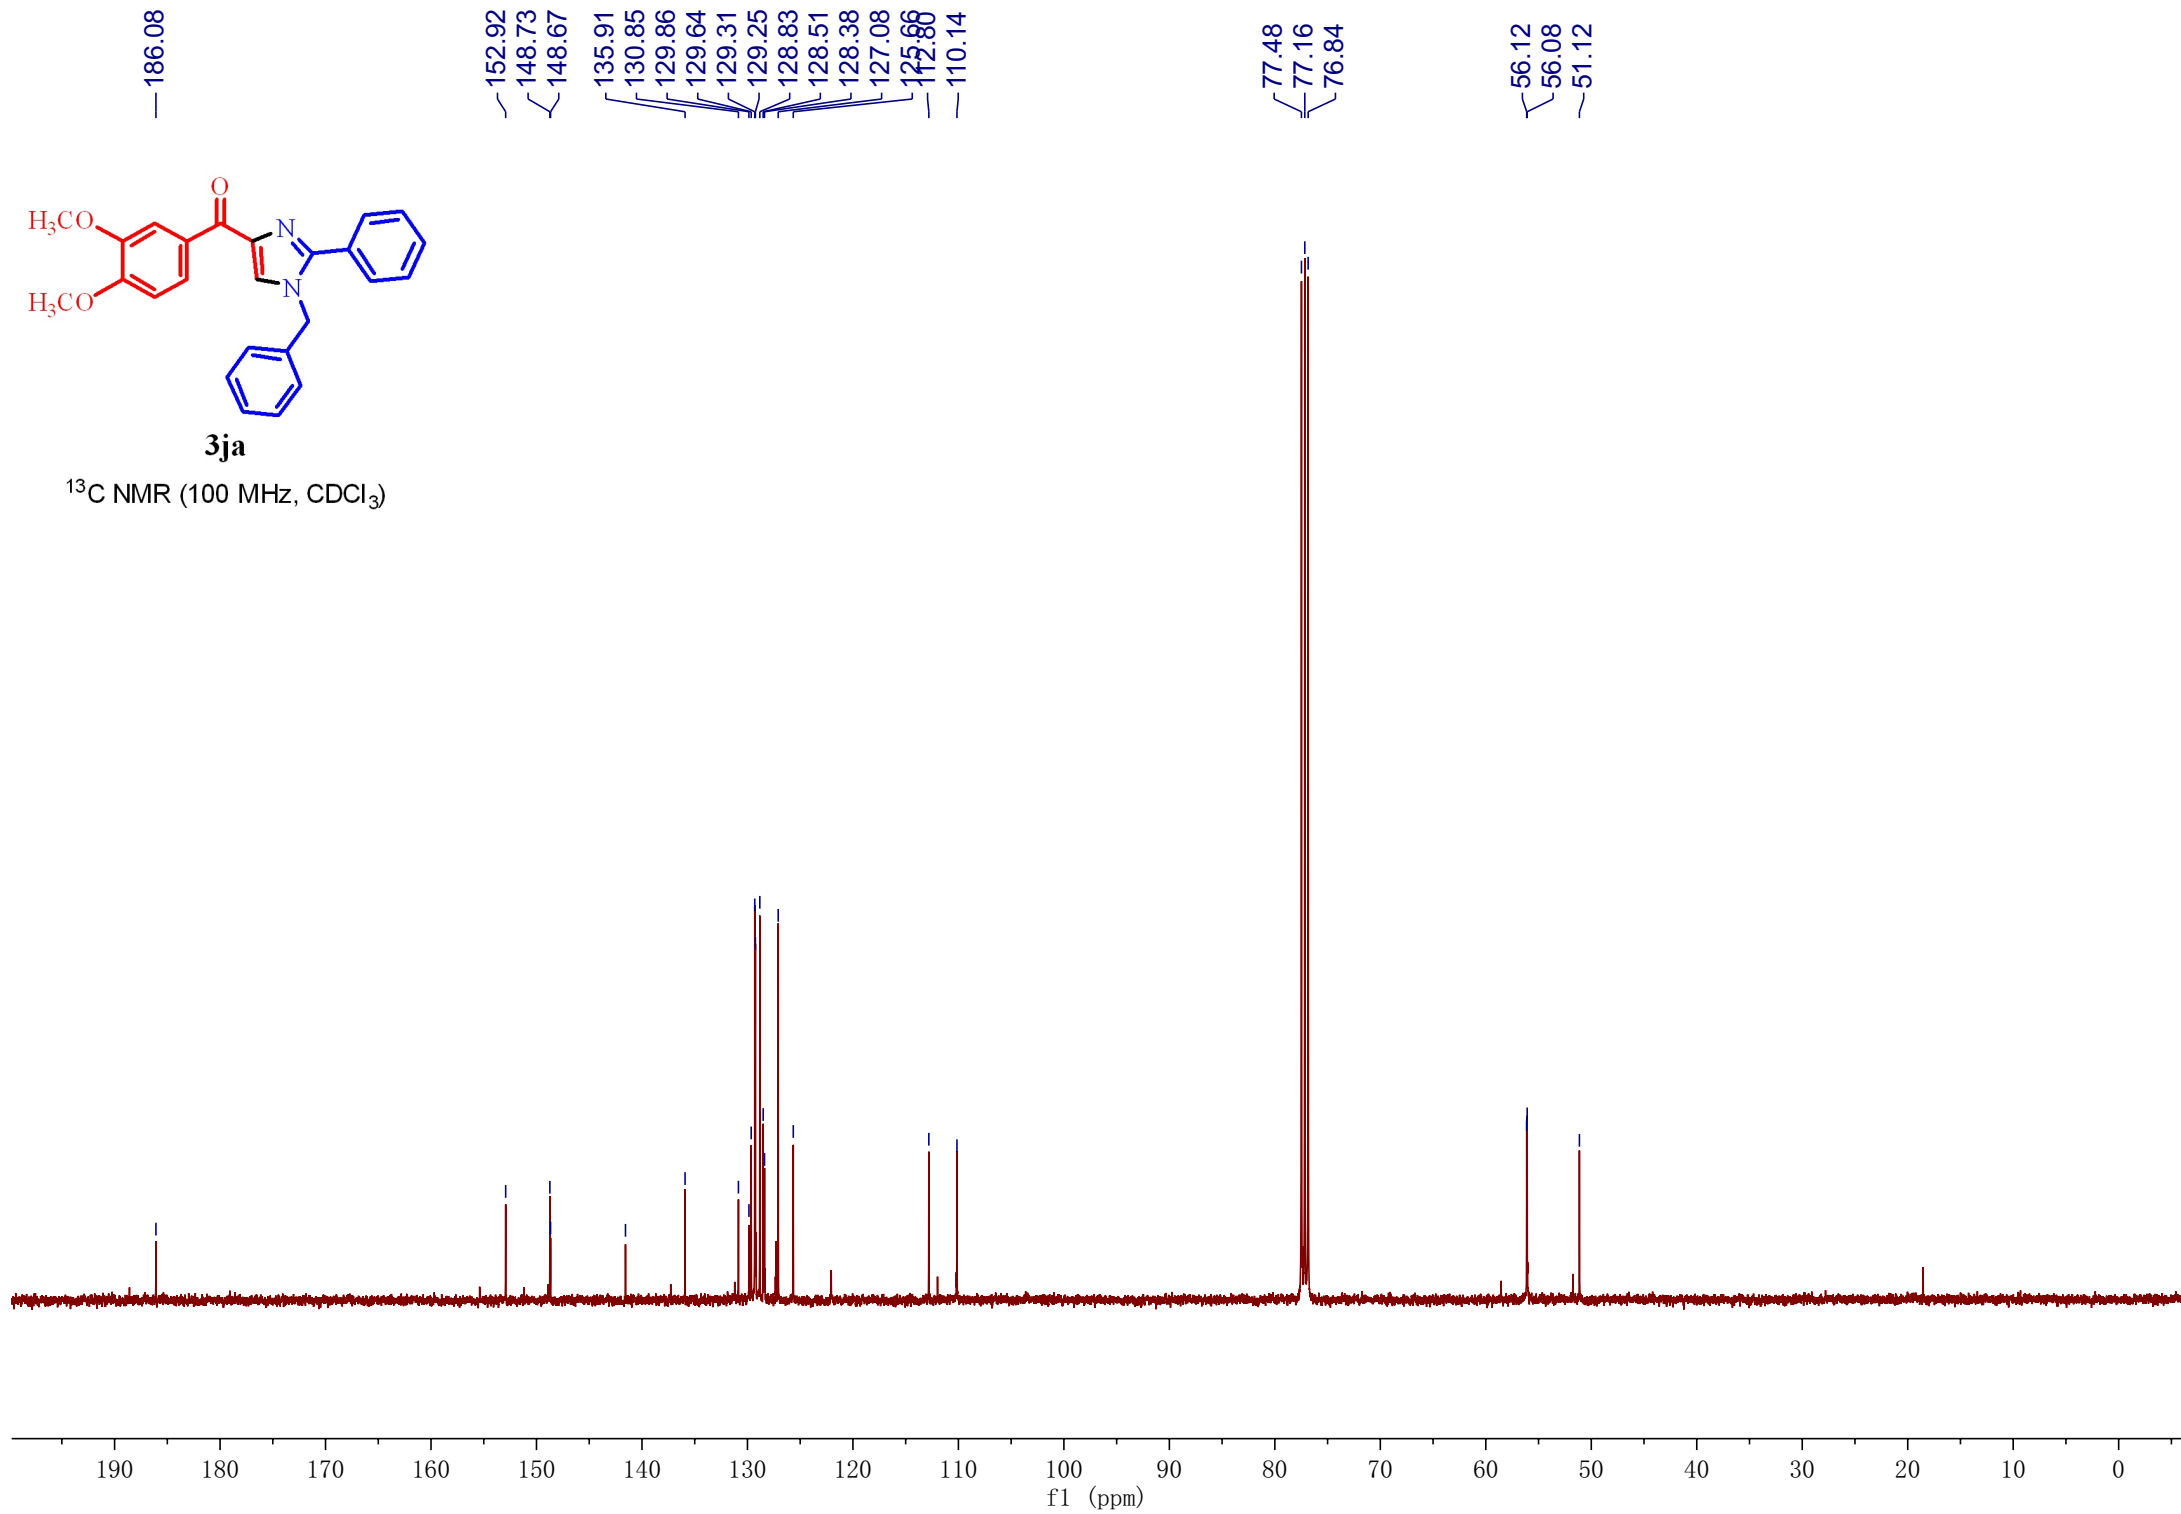

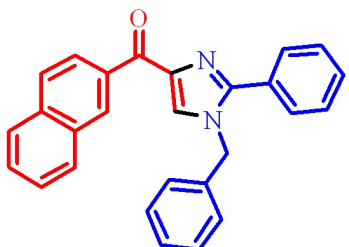

**3ka**

<sup>1</sup>H NMR (400 MHz, CDCl<sub>3</sub>)

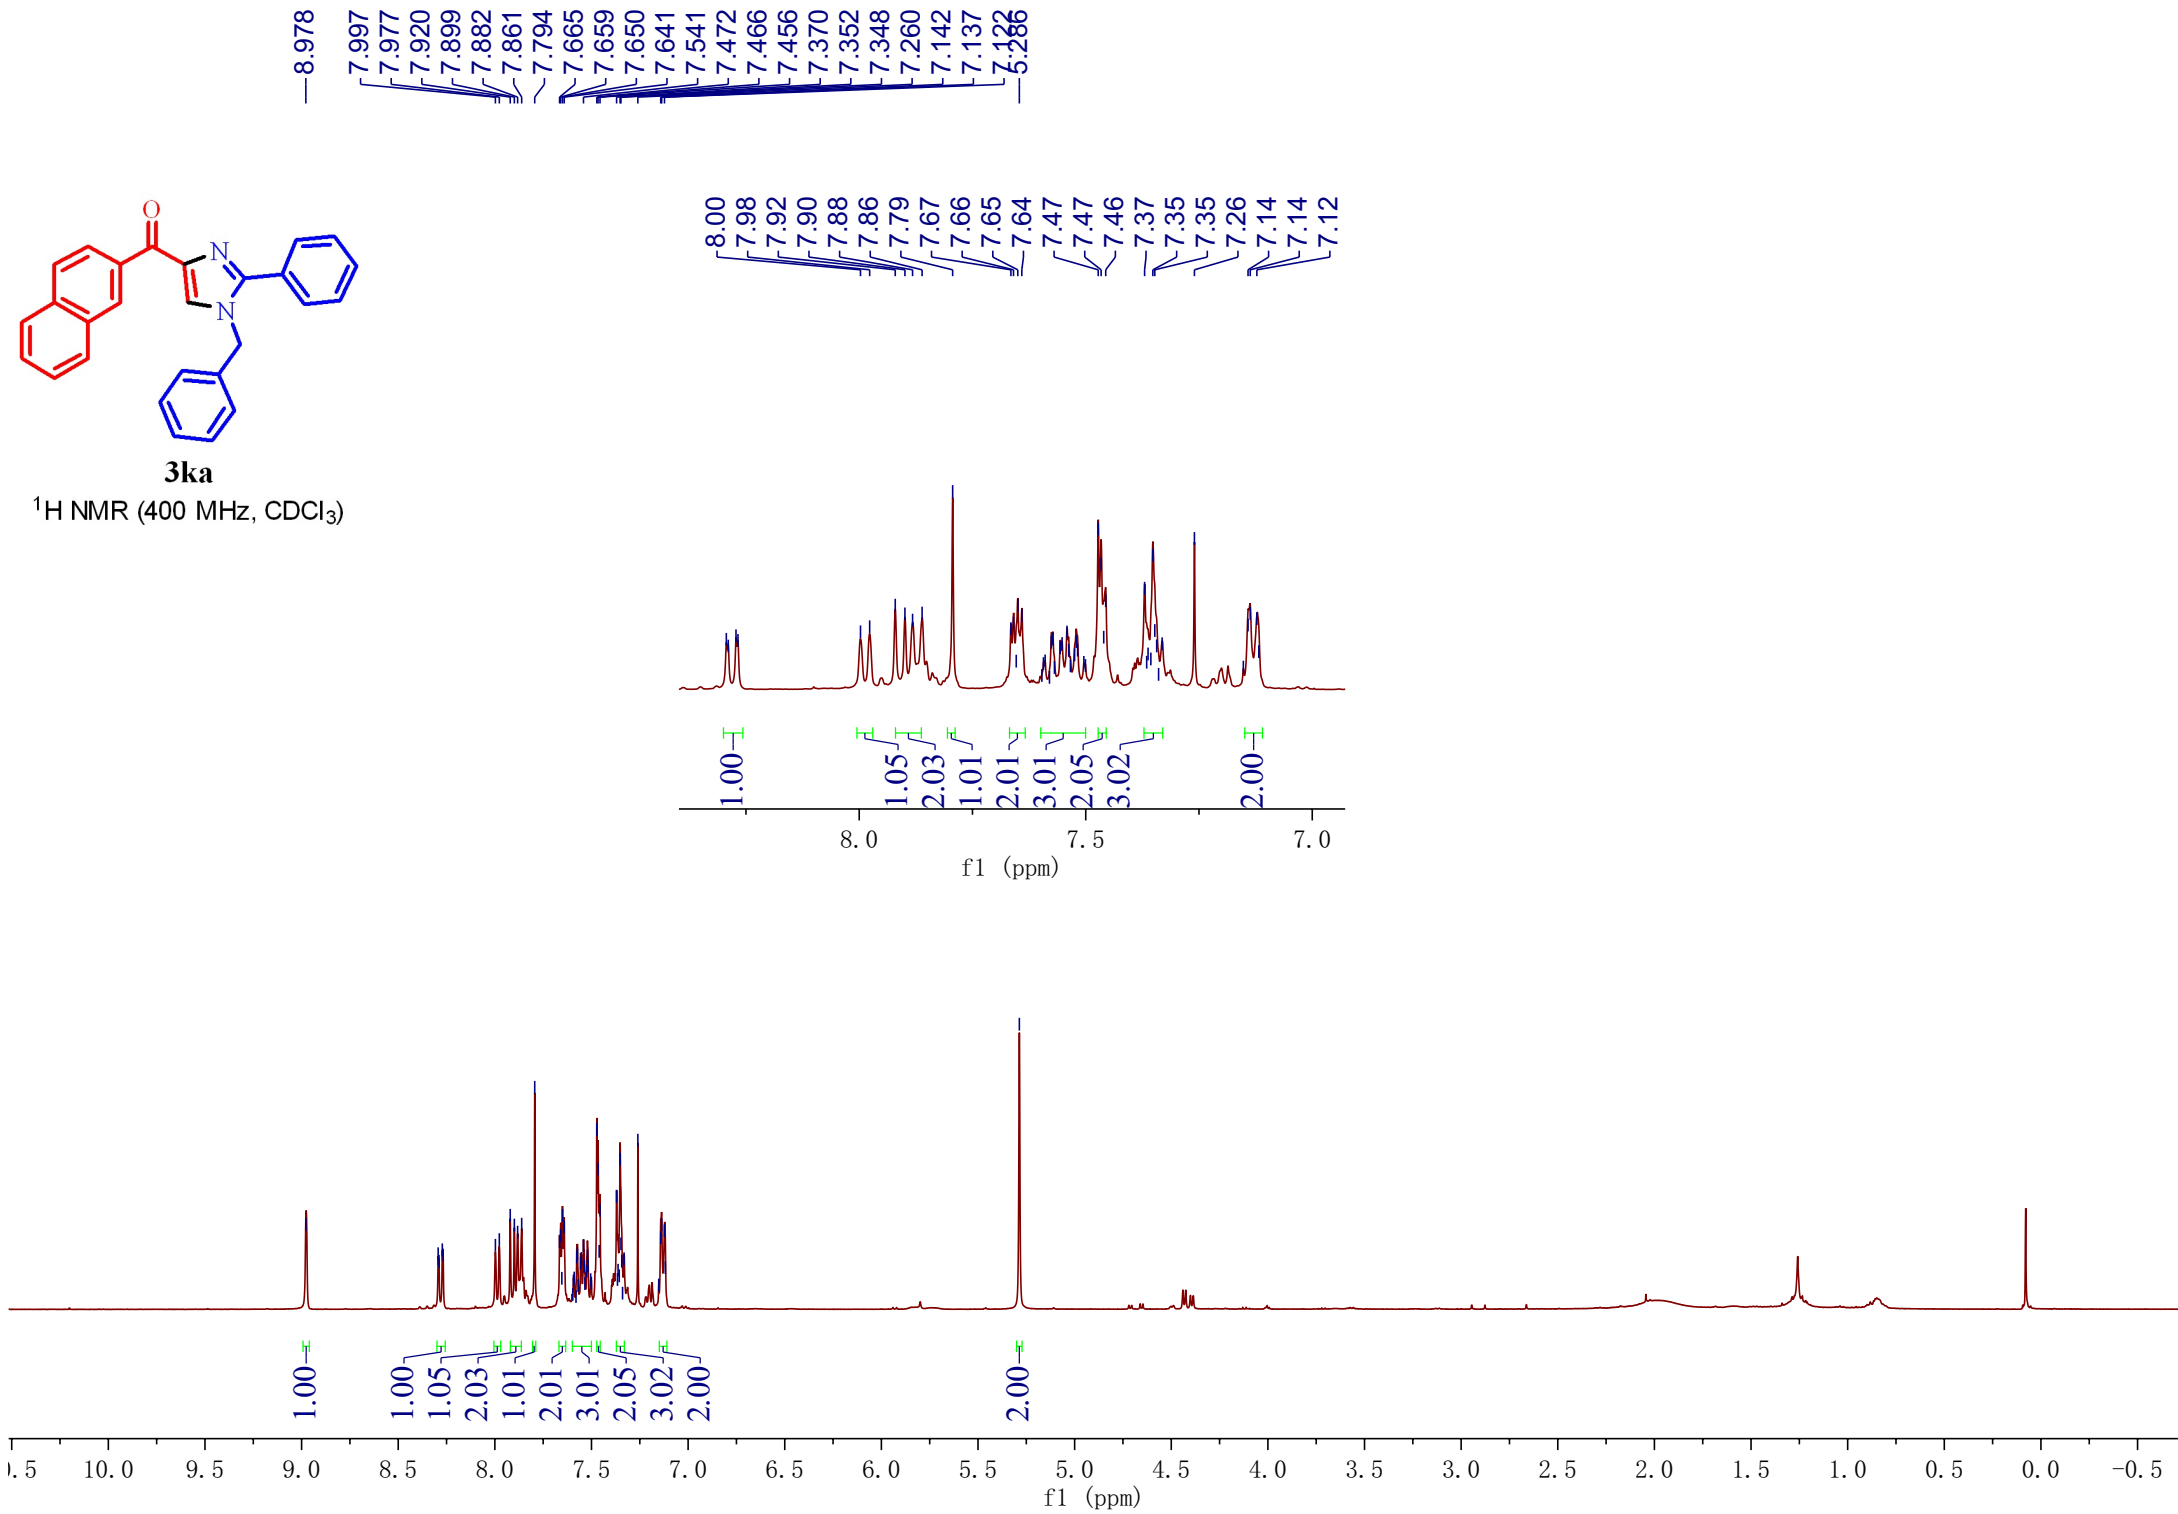

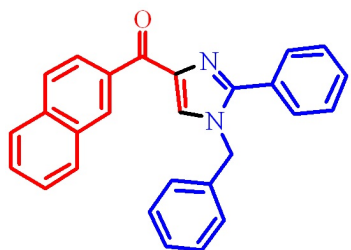

**3ka**

<sup>13</sup>C NMR (100 MHz, CDCl<sub>3</sub>)

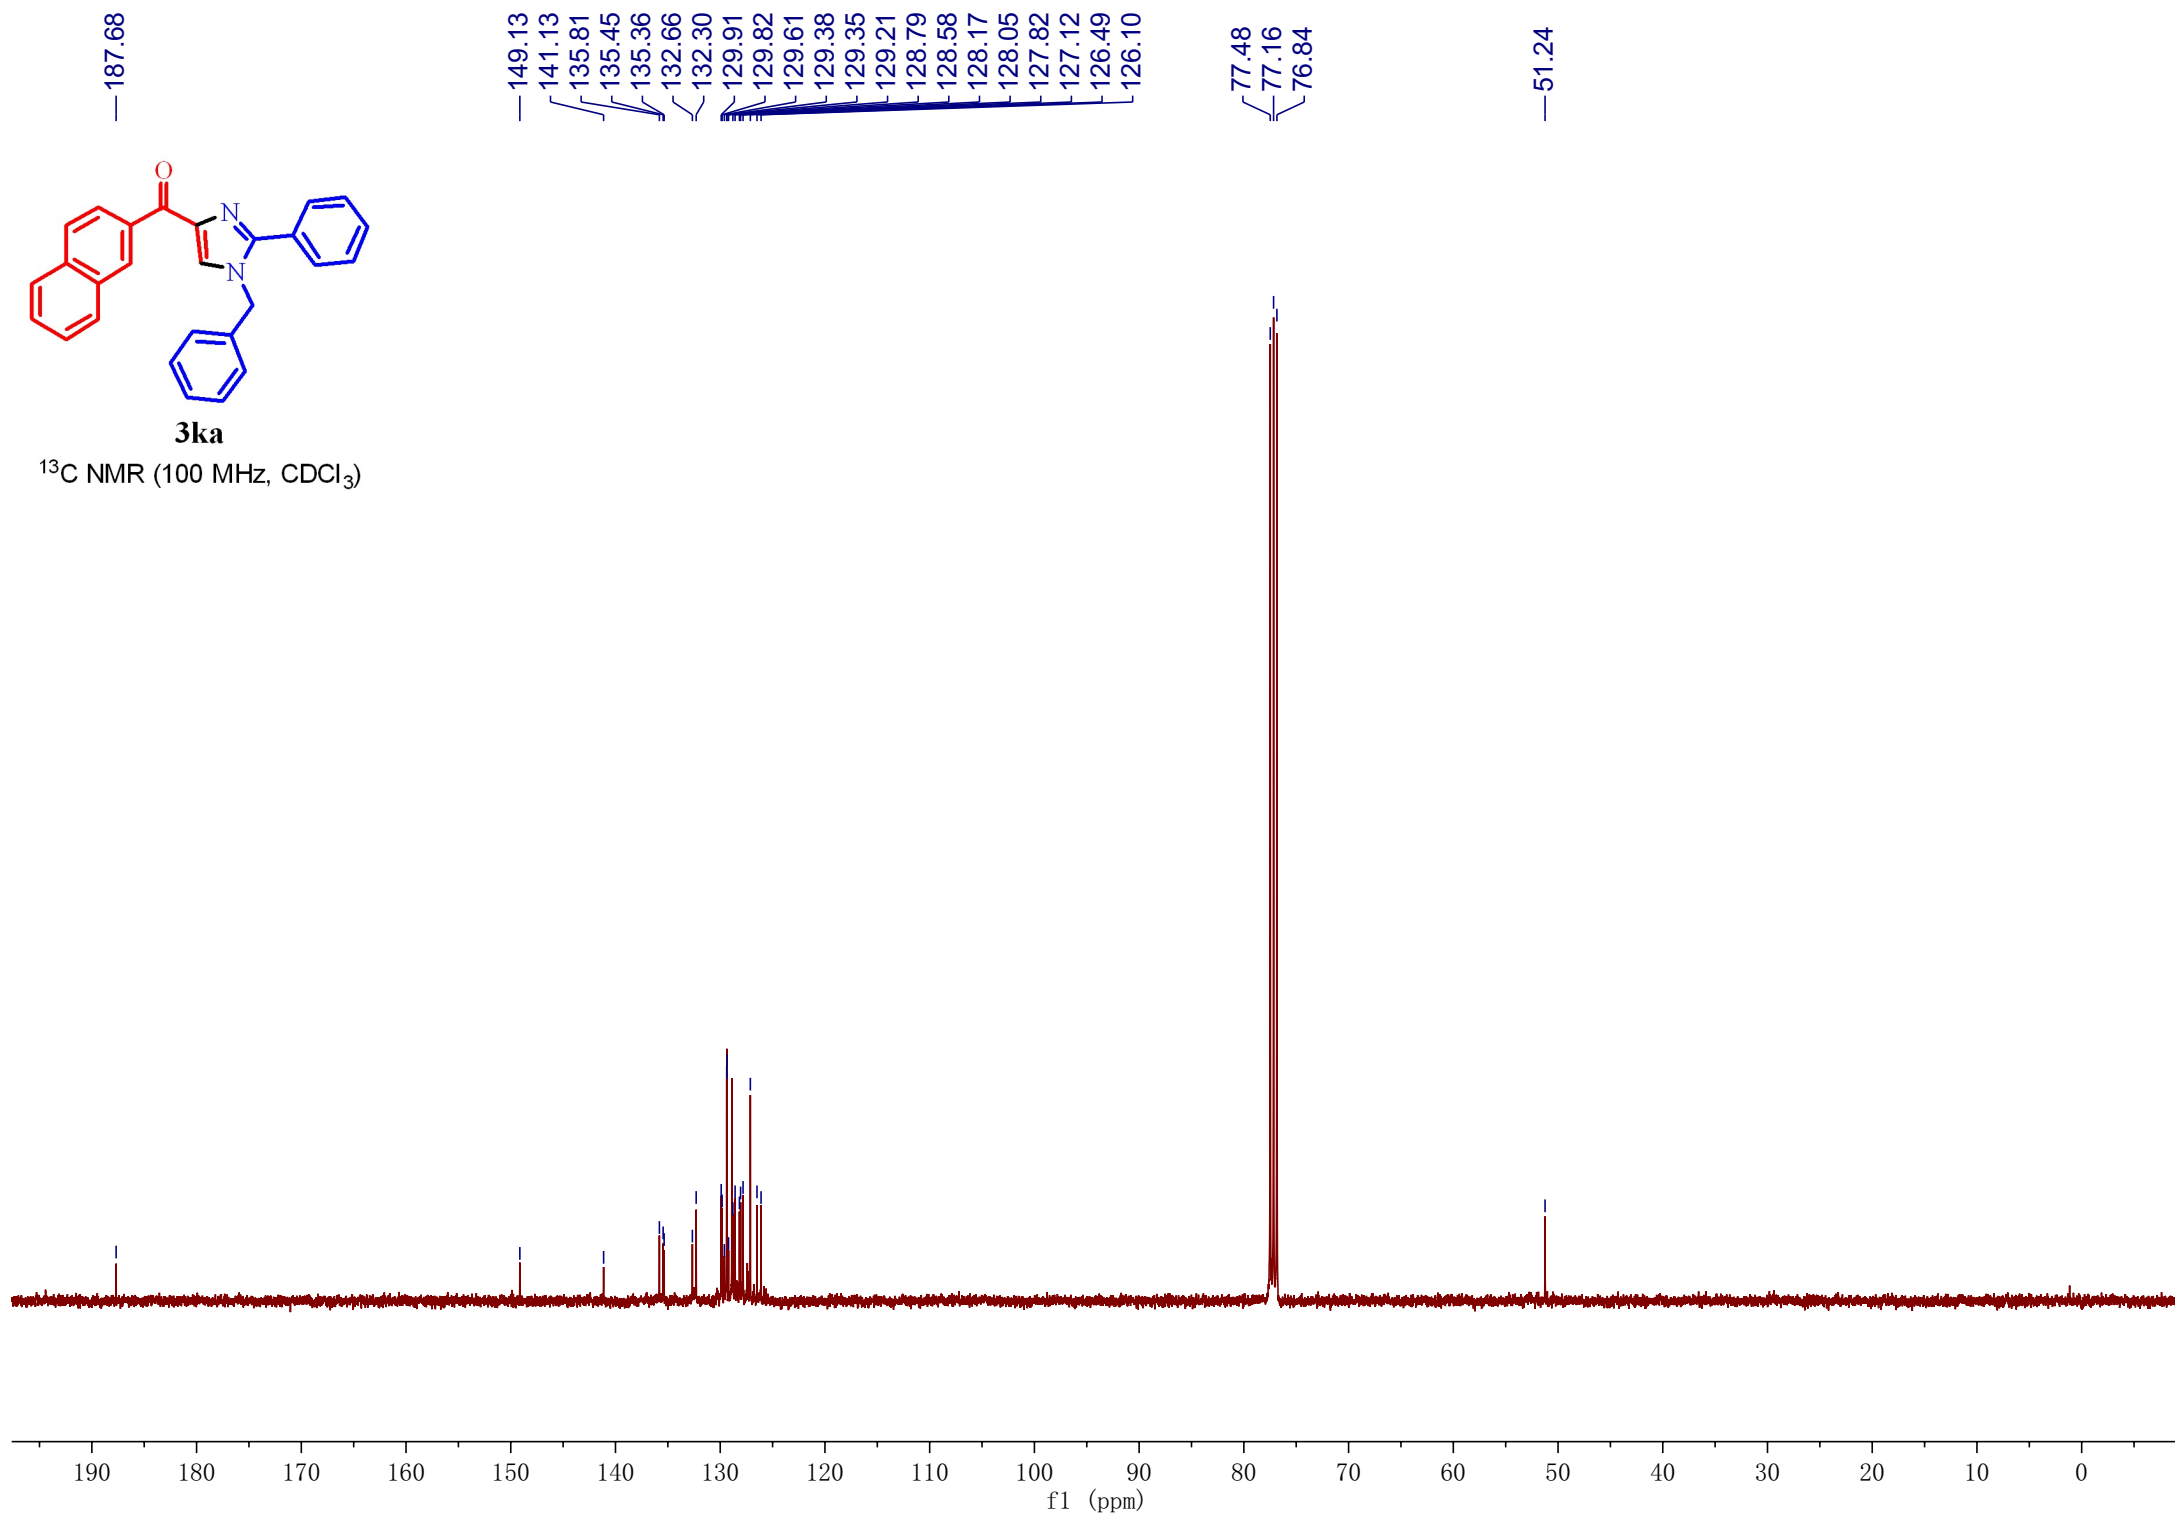

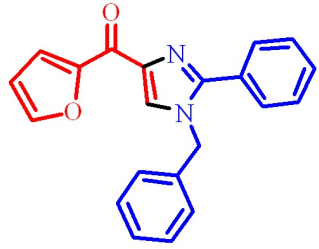

**3la**

$^1\text{H NMR}$  (400 MHz,  $\text{CDCl}_3$ )

8.098  
8.089  
7.908  
7.661  
7.657  
7.626  
7.620  
7.612  
7.602  
7.459  
7.454  
7.446  
7.442  
7.356  
7.337  
7.260  
7.118  
7.112  
7.098  
7.094  
6.571  
6.566  
6.561

5.254

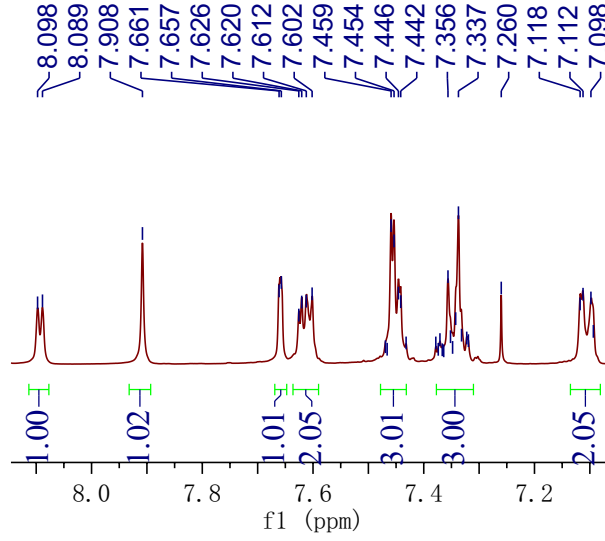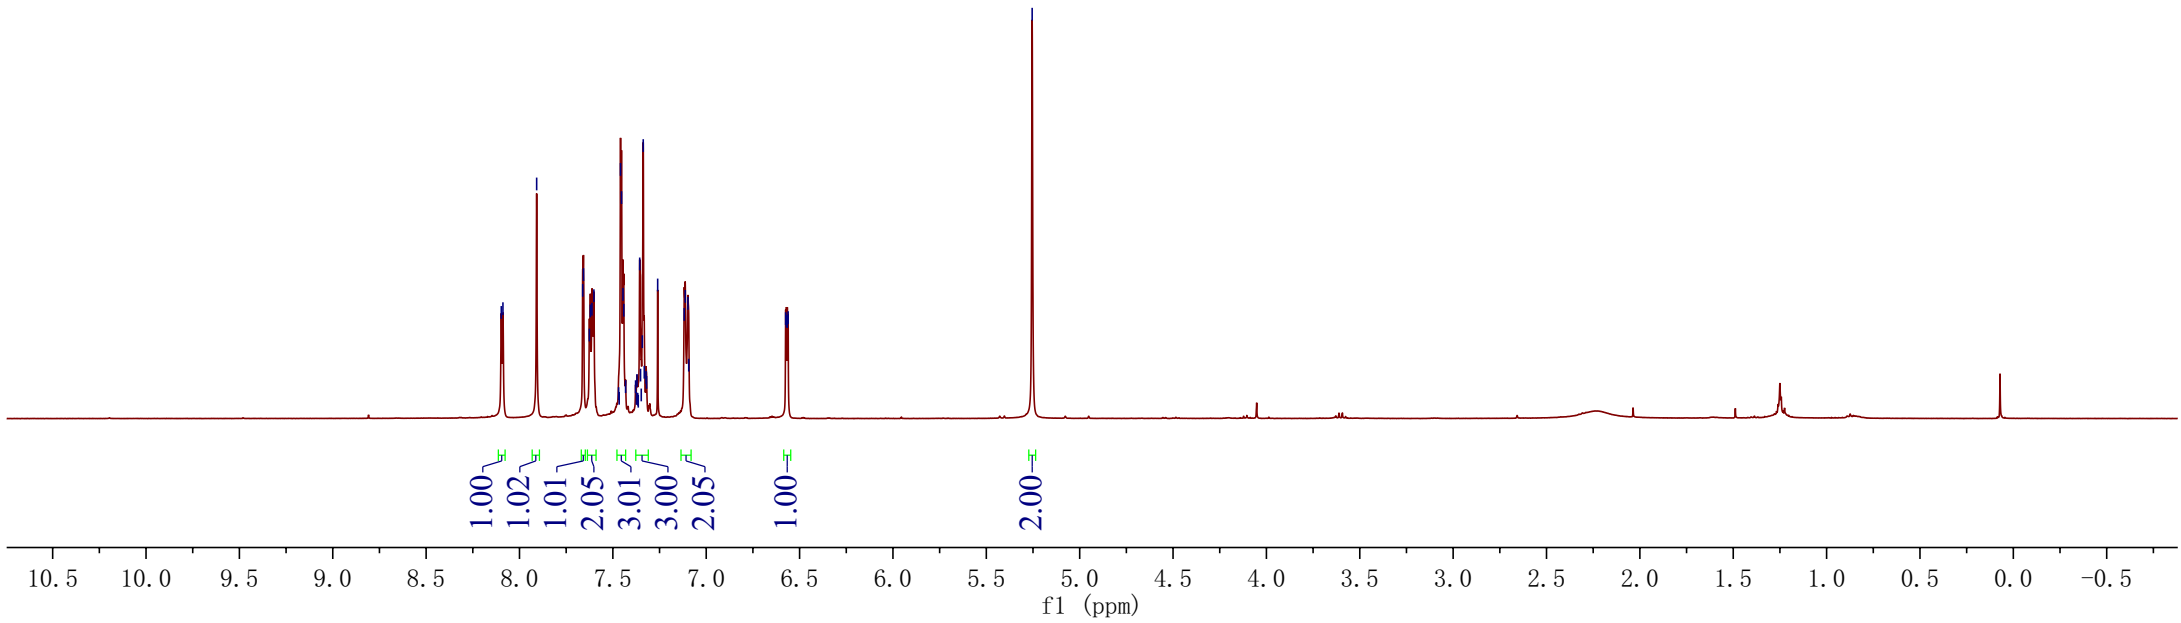

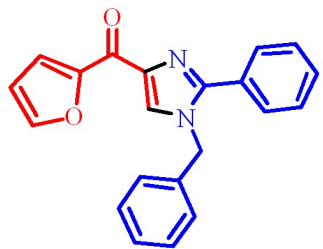

**3la**

$^{13}\text{C}$  NMR (100 MHz,  $\text{CDCl}_3$ )

174.41  
152.05  
148.95  
146.72  
140.02  
135.77  
129.75  
129.32  
129.26  
128.85  
128.54  
127.08  
121.39  
121.34  
77.48  
77.16  
76.84  
51.21

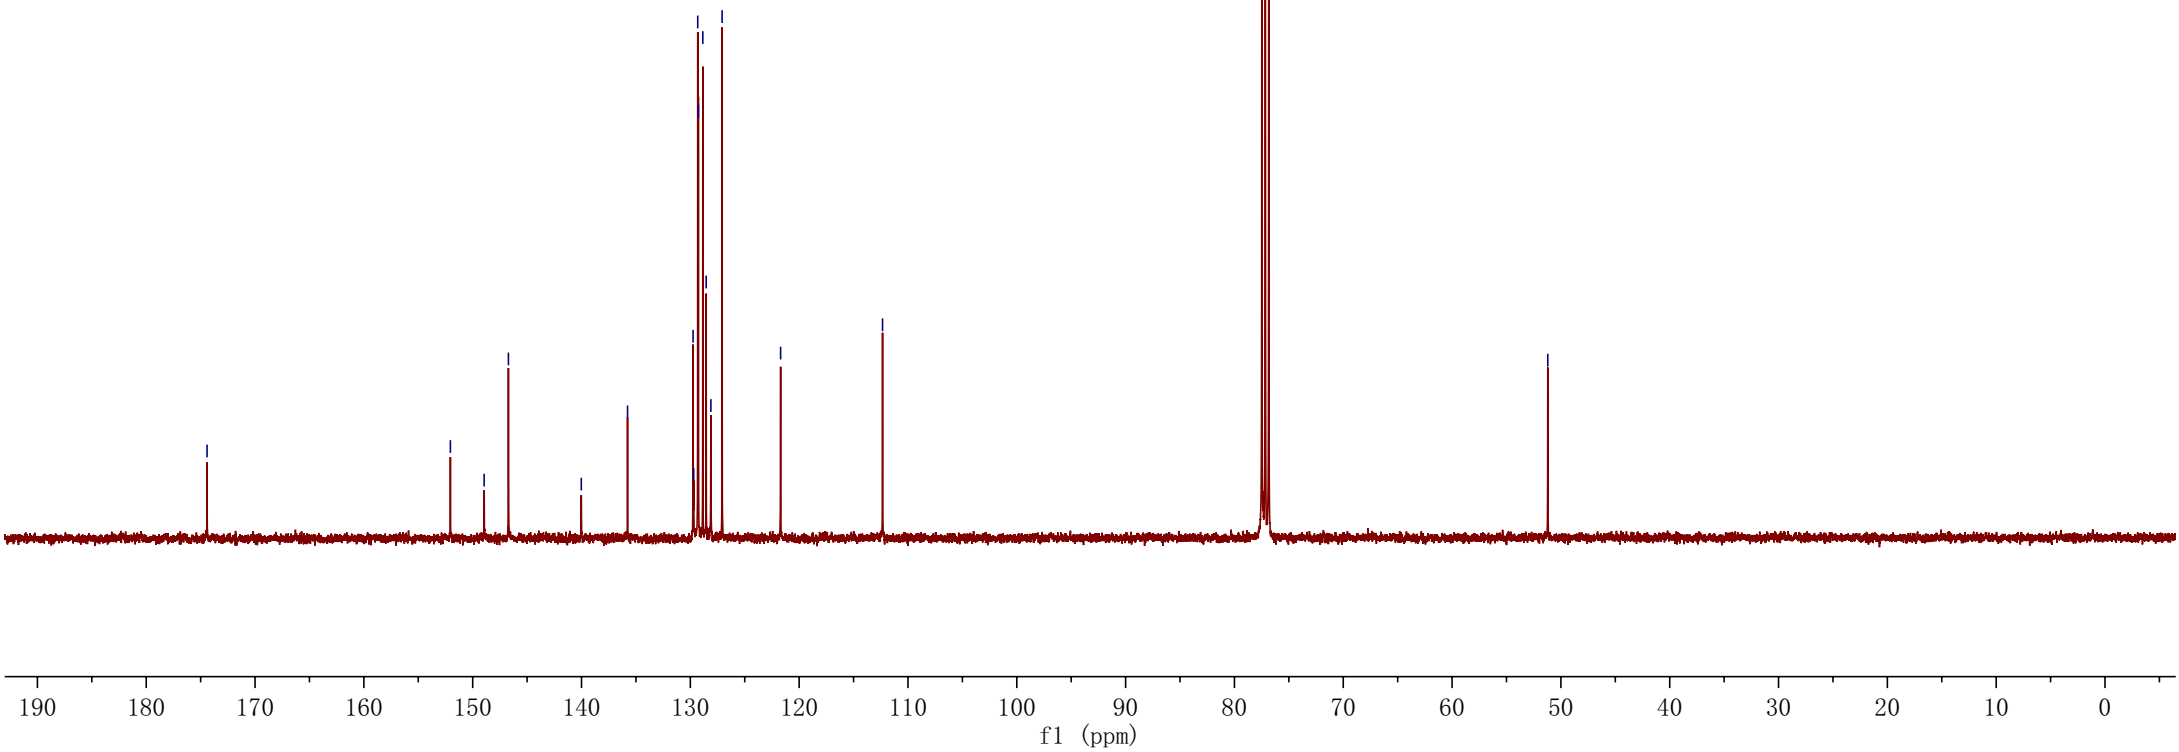

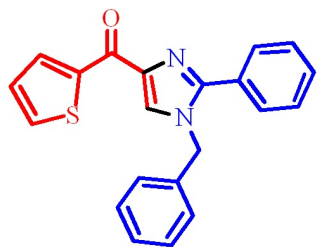

**3ma**

$^1\text{H}$  NMR (400 MHz,  $\text{CDCl}_3$ )

8.680  
8.677  
8.670  
8.667  
7.834  
7.665  
7.653  
7.646  
7.636  
7.628  
7.468  
7.461  
7.452  
7.359  
7.356  
7.340  
7.260  
7.177  
7.168  
7.155  
7.125  
7.120  
7.106  
7.101

7.834  
7.668  
7.665  
7.656  
7.653  
7.646  
7.636  
7.628  
7.468  
7.461  
7.452  
7.359  
7.345  
7.340  
7.260  
7.177  
7.168  
7.165  
7.155  
7.125  
7.120  
7.106  
7.101

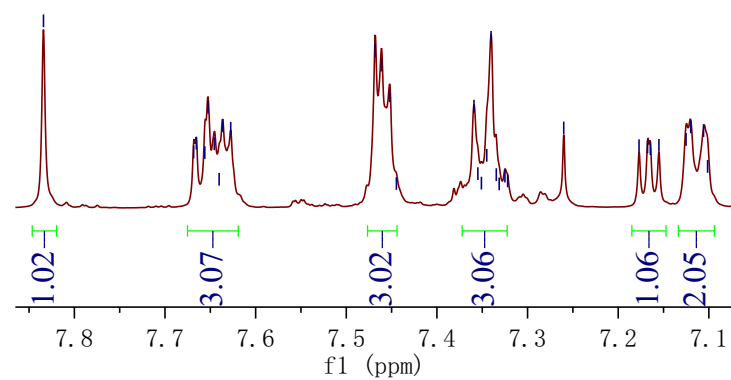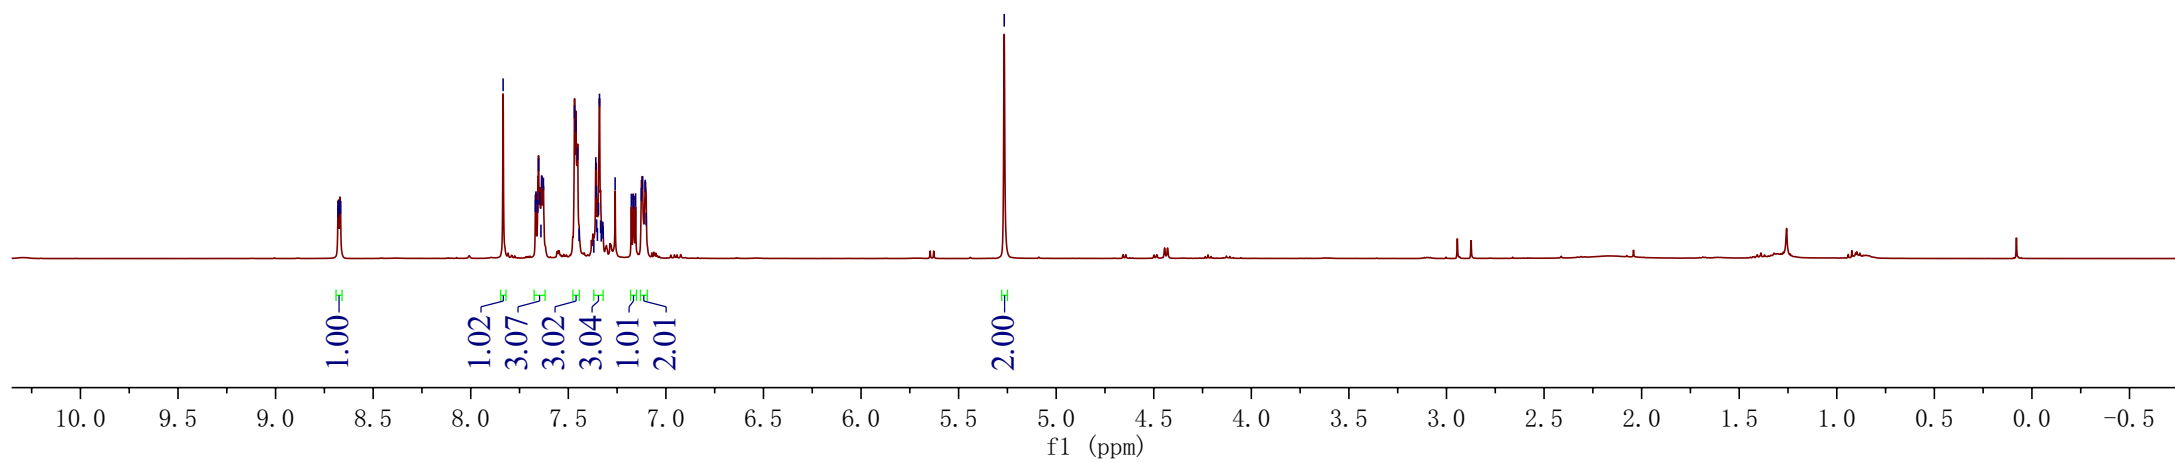



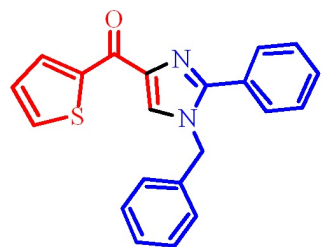

**3ma**

$^{13}\text{C}$  NMR (100 MHz,  $\text{CDCl}_3$ )

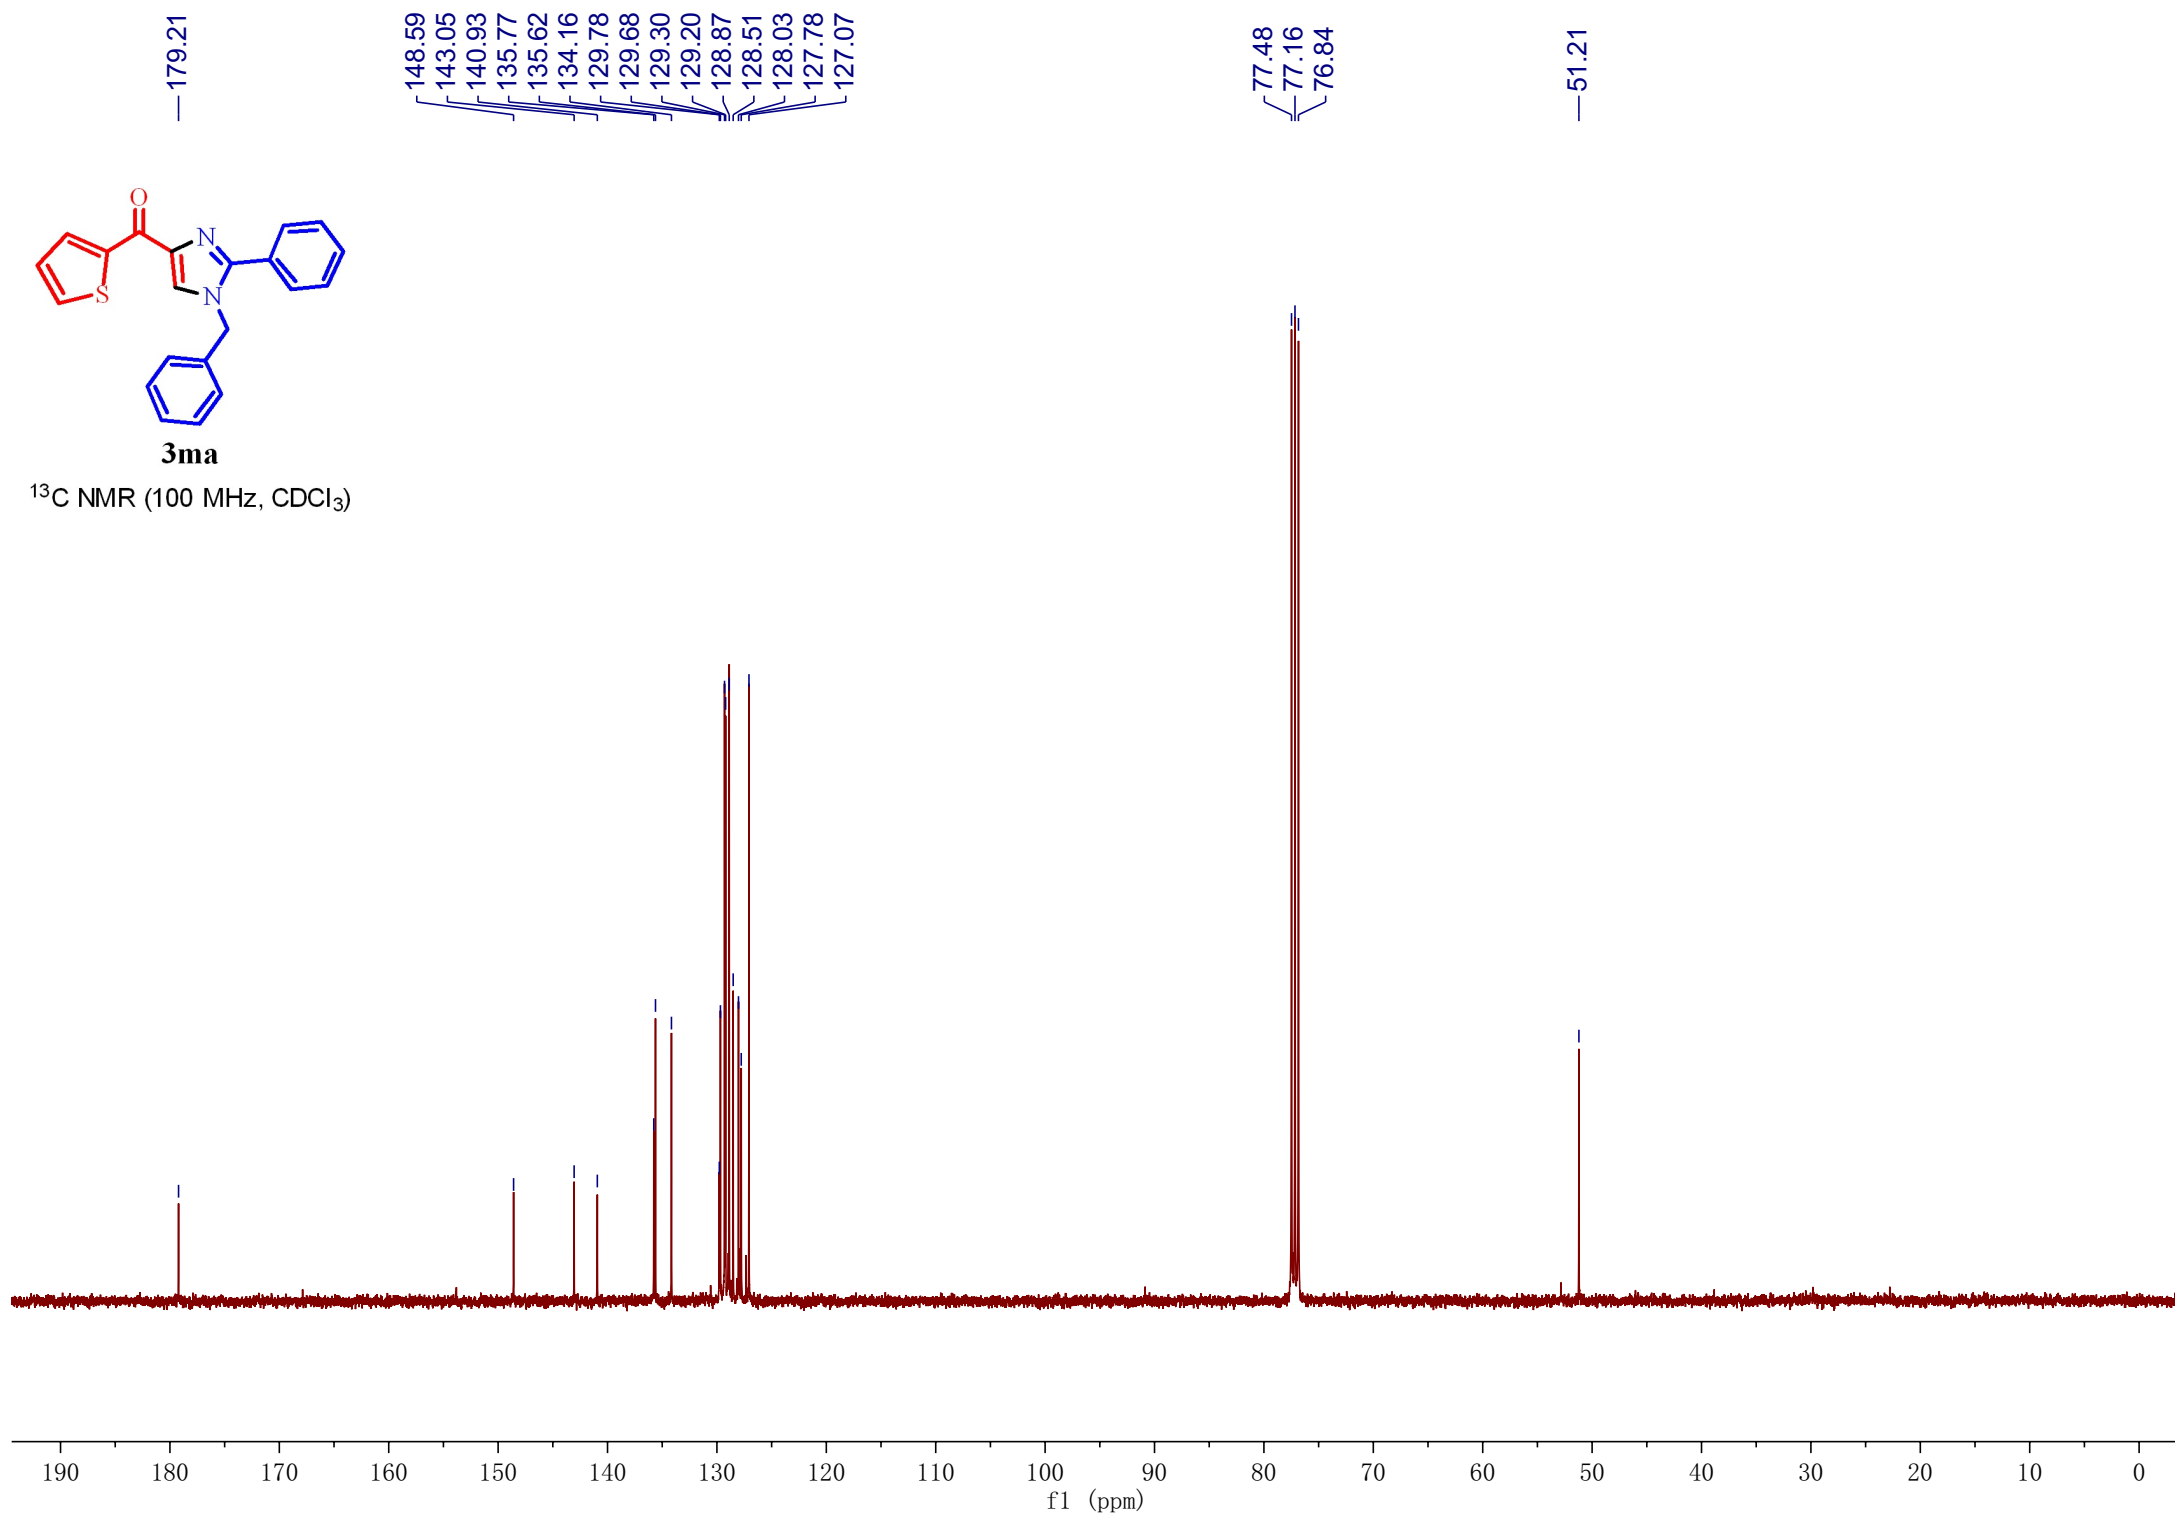

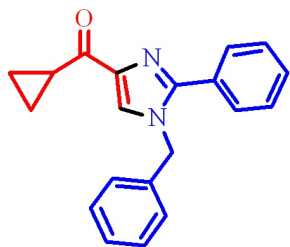

**3na**

<sup>1</sup>H NMR (400 MHz, CDCl<sub>3</sub>)

7.651  
7.590  
7.585  
7.576  
7.566  
7.455  
7.449  
7.441  
7.437  
7.427  
7.363  
7.349  
7.336  
7.331  
7.260  
7.094  
7.089  
7.075  
7.070

5.209

3.125  
3.113  
3.104  
3.093  
3.082  
3.073  
3.062

1.231  
1.220  
1.211  
1.201  
1.192  
1.029  
1.021  
1.012  
1.001  
0.992  
0.983

7.651  
7.590  
7.585  
7.576  
7.566  
7.455  
7.449  
7.441  
7.437  
7.427  
7.363  
7.349  
7.336  
7.331  
7.317  
7.260  
7.094  
7.089  
7.075  
7.070

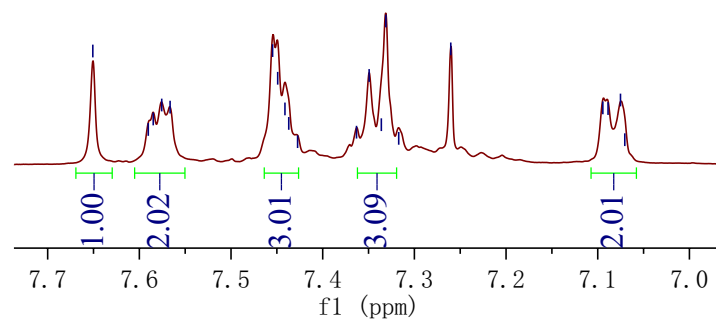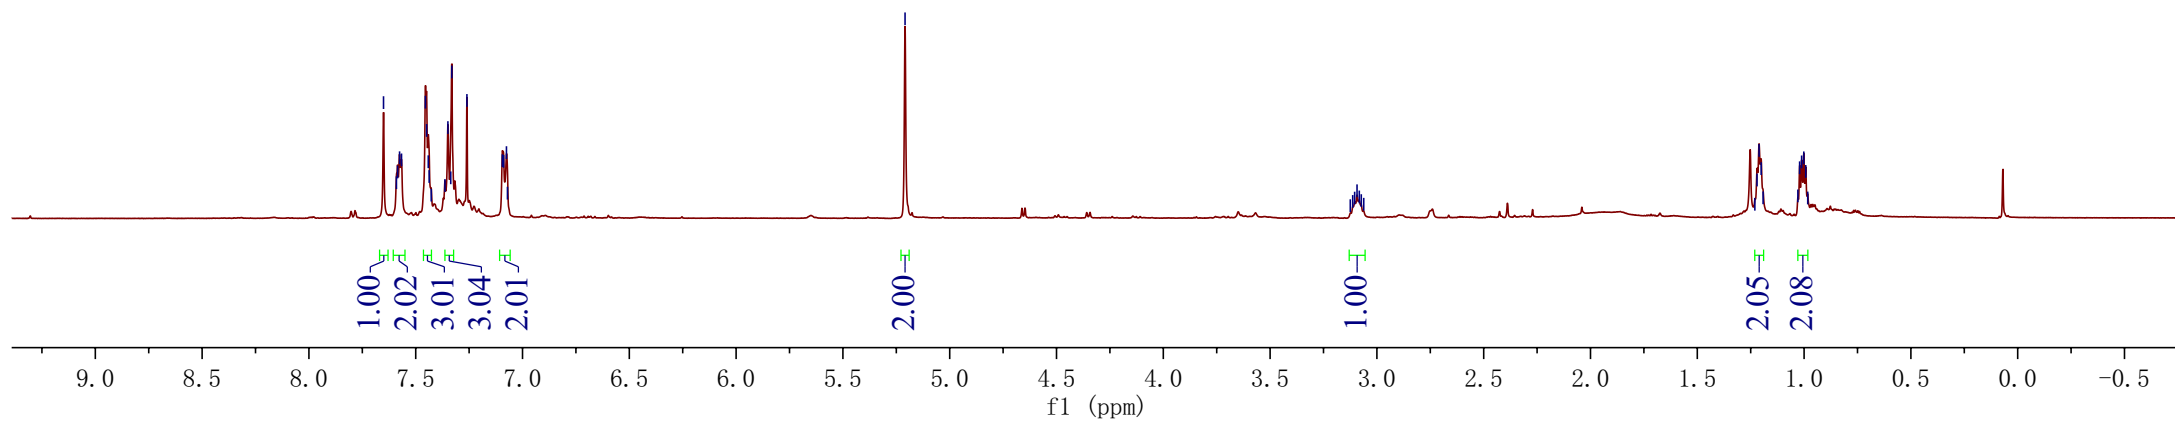

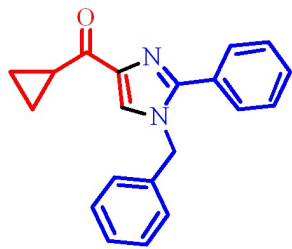

**3na**

<sup>13</sup>C NMR (100 MHz, CDCl<sub>3</sub>)

— 196.61  
— 148.90  
— 141.92  
— 135.81  
— 129.77  
— 129.34  
— 129.31  
— 128.92  
— 128.54  
— 127.13  
— 124.83

{ 77.48  
— 77.16  
— 76.84

— 51.17

— 17.23  
— 11.80

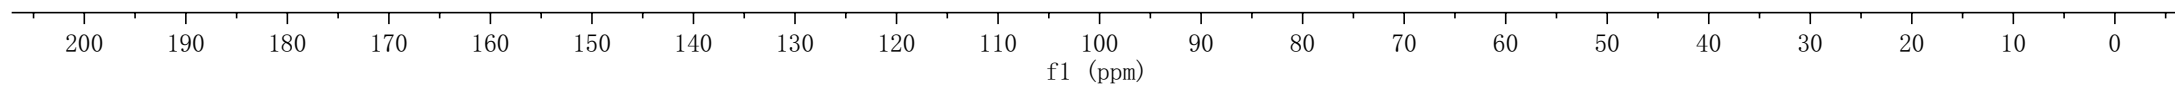

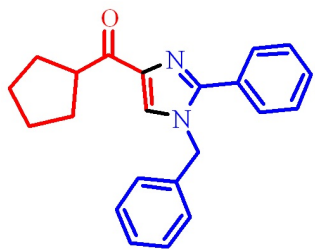

**30a**

<sup>1</sup>H NMR (400 MHz, CDCl<sub>3</sub>)

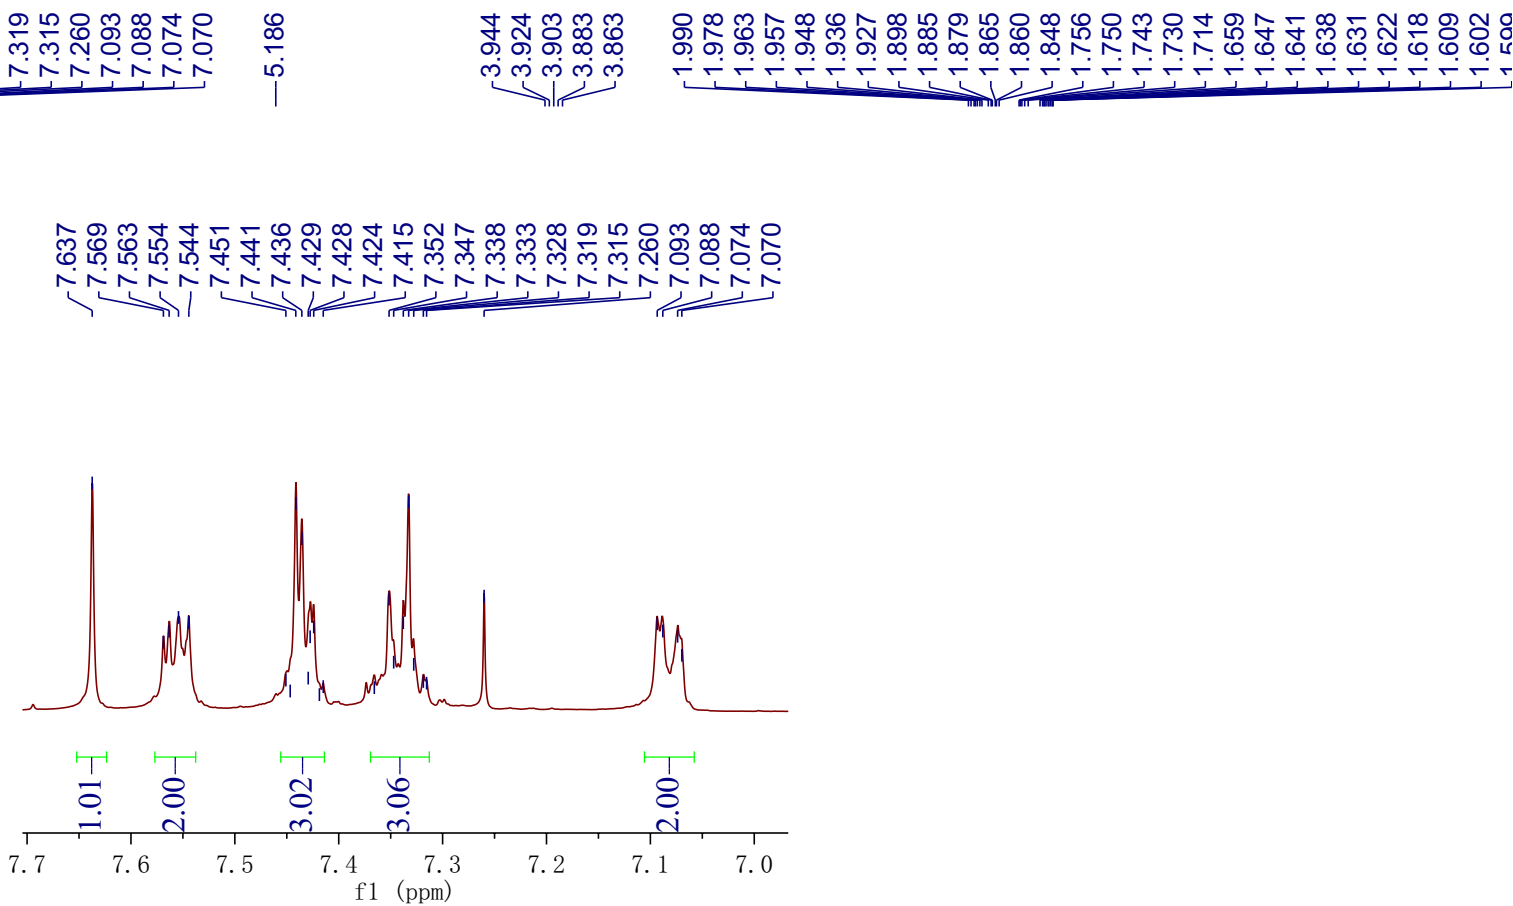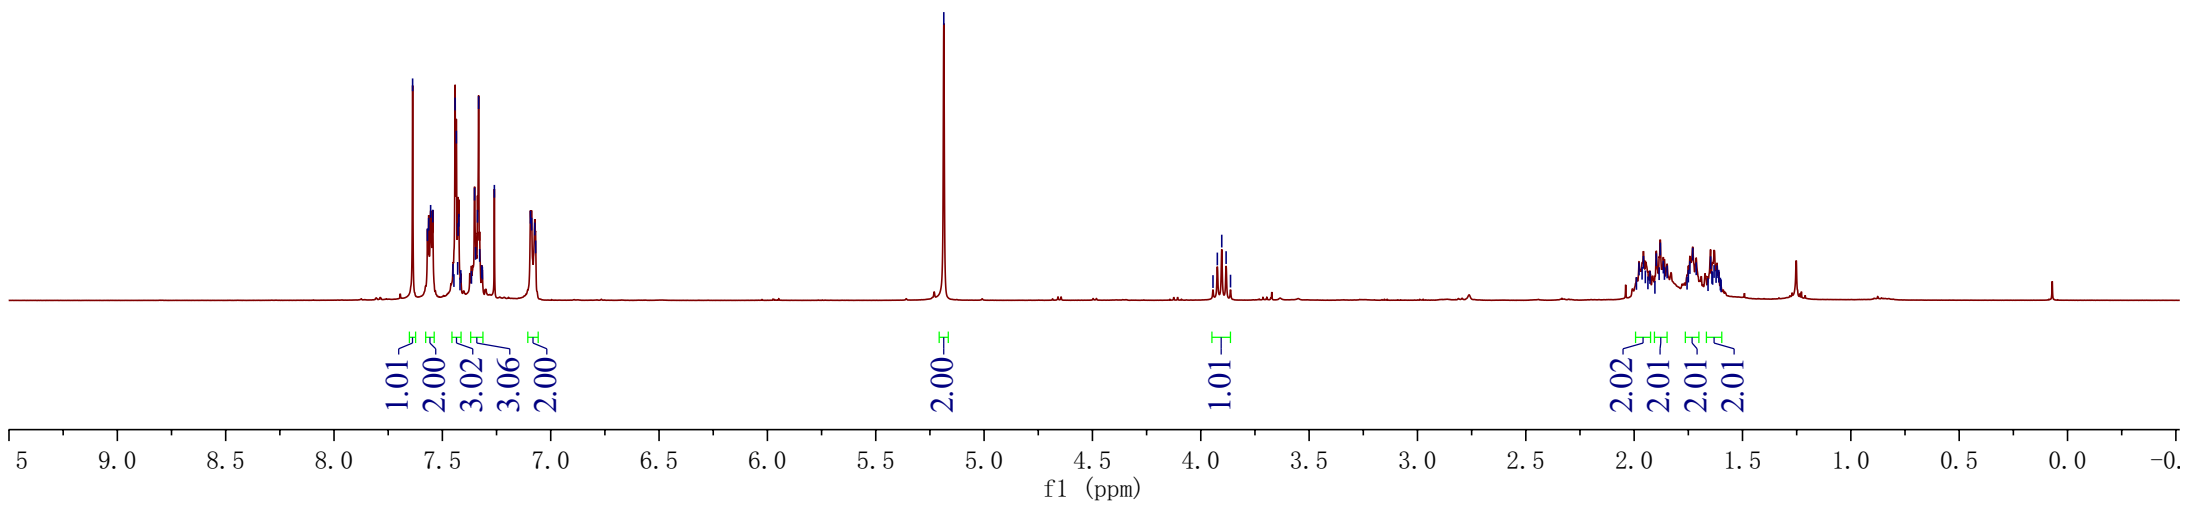

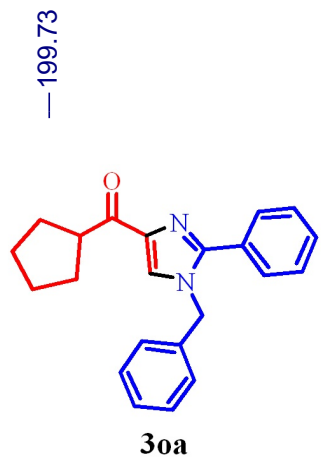

$^{13}\text{C}$  NMR (100 MHz,  $\text{CDCl}_3$ )

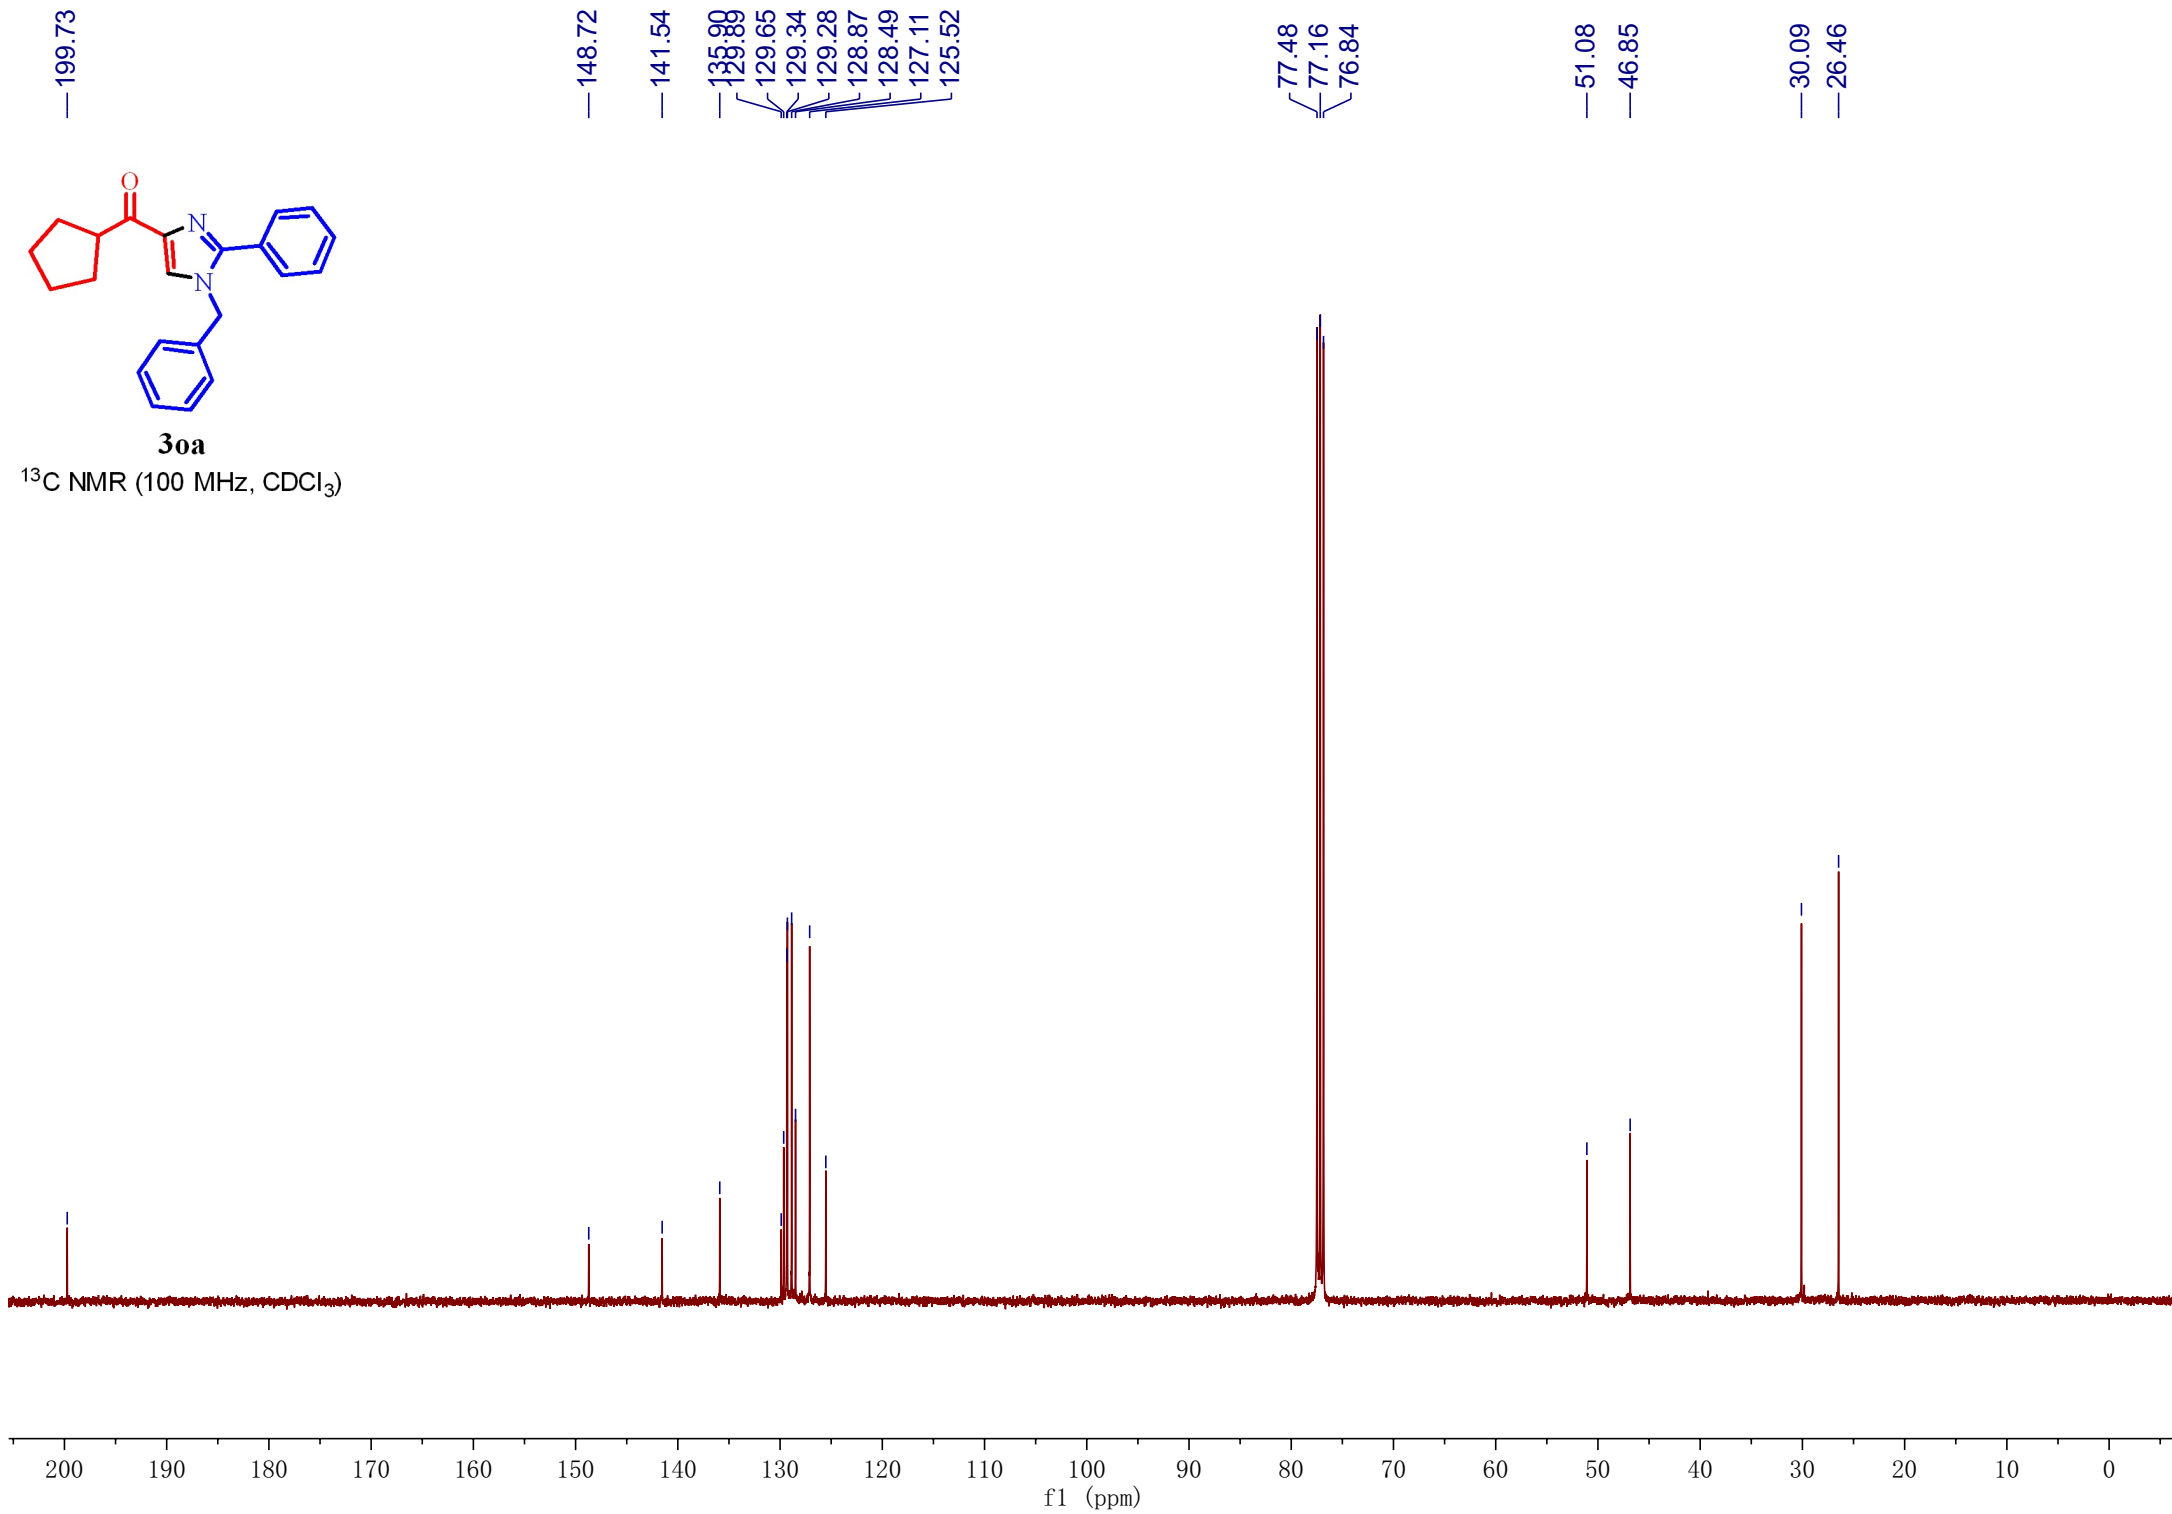

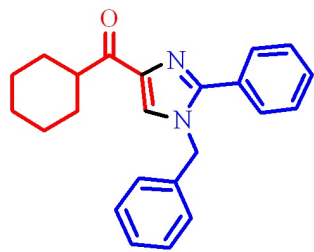

**3pa**

<sup>1</sup>H NMR (400 MHz, CDCl<sub>3</sub>)

7.637  
7.570  
7.564  
7.555  
7.546  
7.462  
7.452  
7.443  
7.438  
7.429  
7.426  
7.416  
7.364  
7.350  
7.332  
7.316  
7.260  
7.090  
7.084  
7.070  
7.066

5.185

3.522  
3.513  
3.505  
3.494  
3.485  
3.477  
3.466  
3.457  
3.448

1.967  
1.954  
1.936  
1.929  
1.821  
1.813  
1.804  
1.792  
1.783  
1.773  
1.715  
1.683  
1.505  
1.497  
1.476  
1.468  
1.445  
1.426  
1.419  
1.411  
1.396  
1.387  
1.379  
1.356

7.637  
7.570  
7.564  
7.555  
7.546

7.443  
7.438  
7.429  
7.332  
7.316  
7.260

7.090  
7.084  
7.070  
7.066

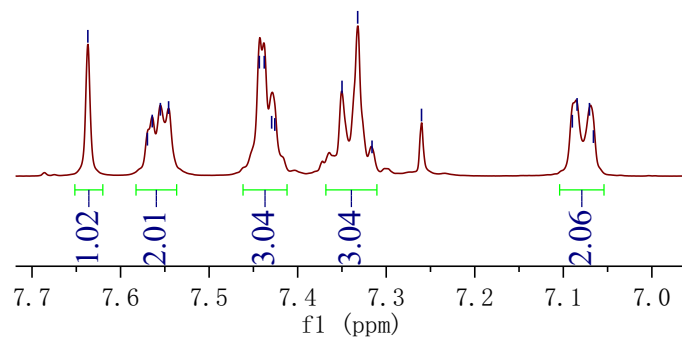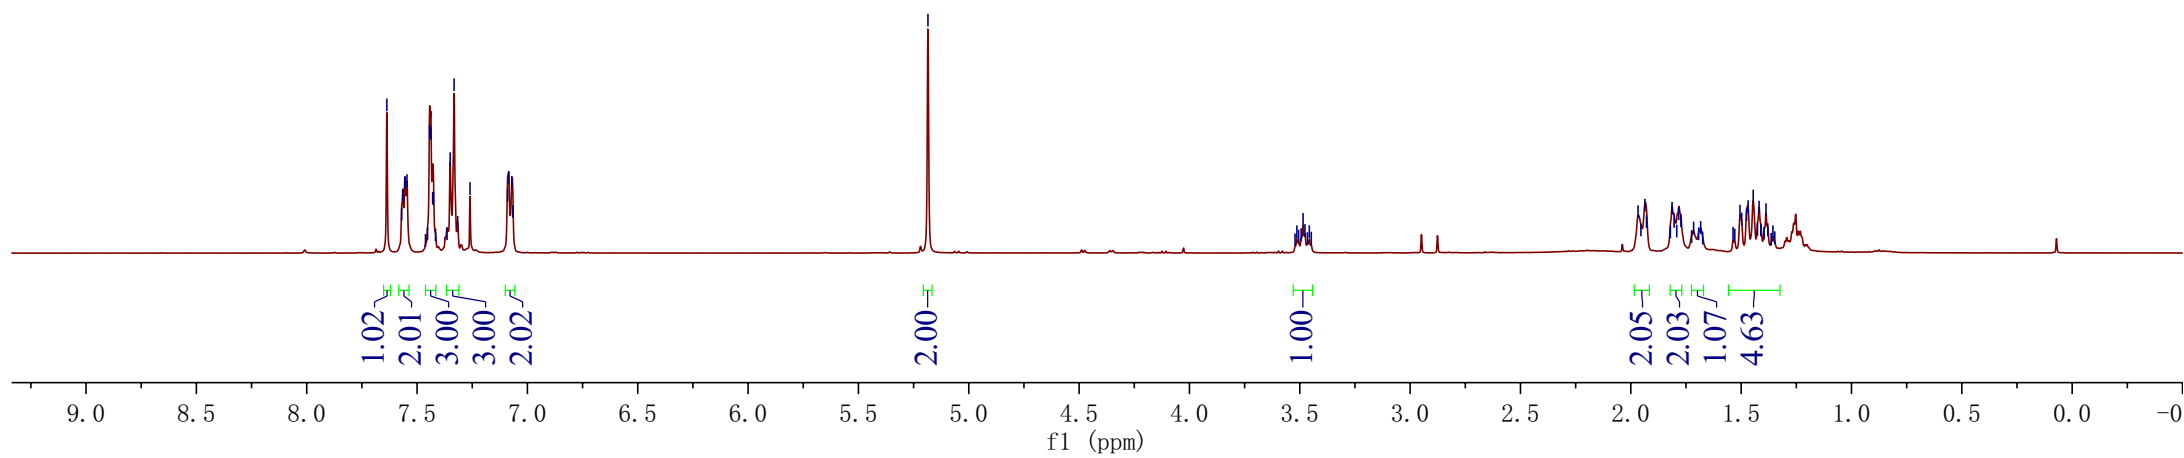

— 200.32

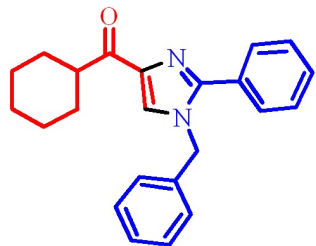

<sup>13</sup>C NMR (100 MHz, CDCl<sub>3</sub>)

— 148.68

— 140.88

— 135.86

— 129.77

— 129.70

— 129.37

— 129.29

— 128.88

— 128.49

— 127.10

— 125.72

— 77.48

— 77.16

— 76.84

— 51.10

— 45.75

— 29.07

— 26.17

— 25.84

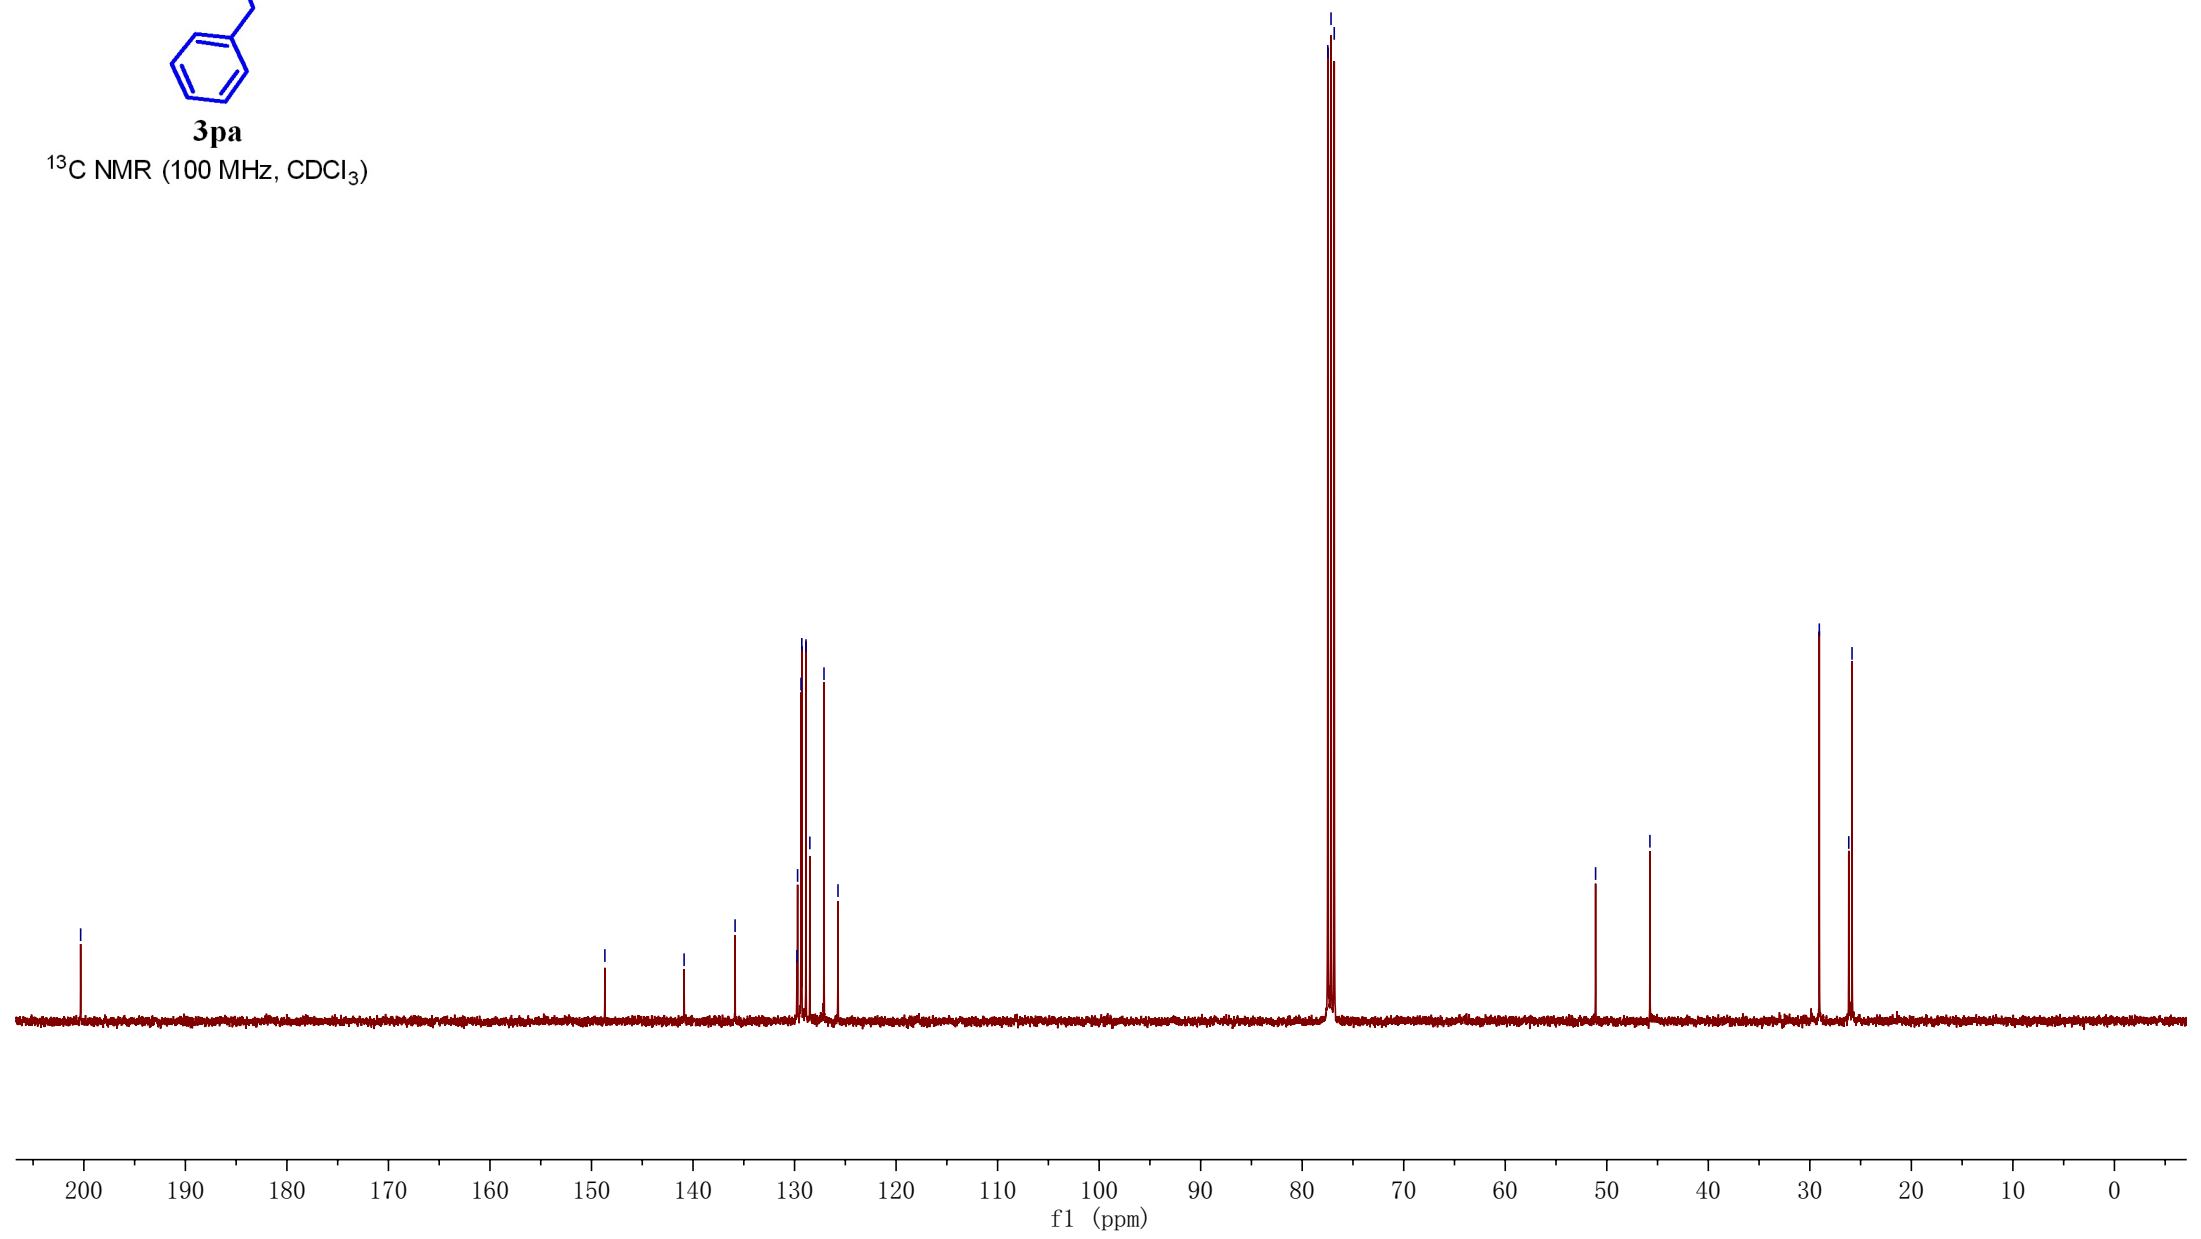

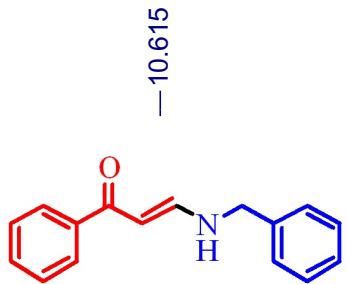

**4a**

$^1\text{H NMR}$  (400 MHz,  $\text{CDCl}_3$ )

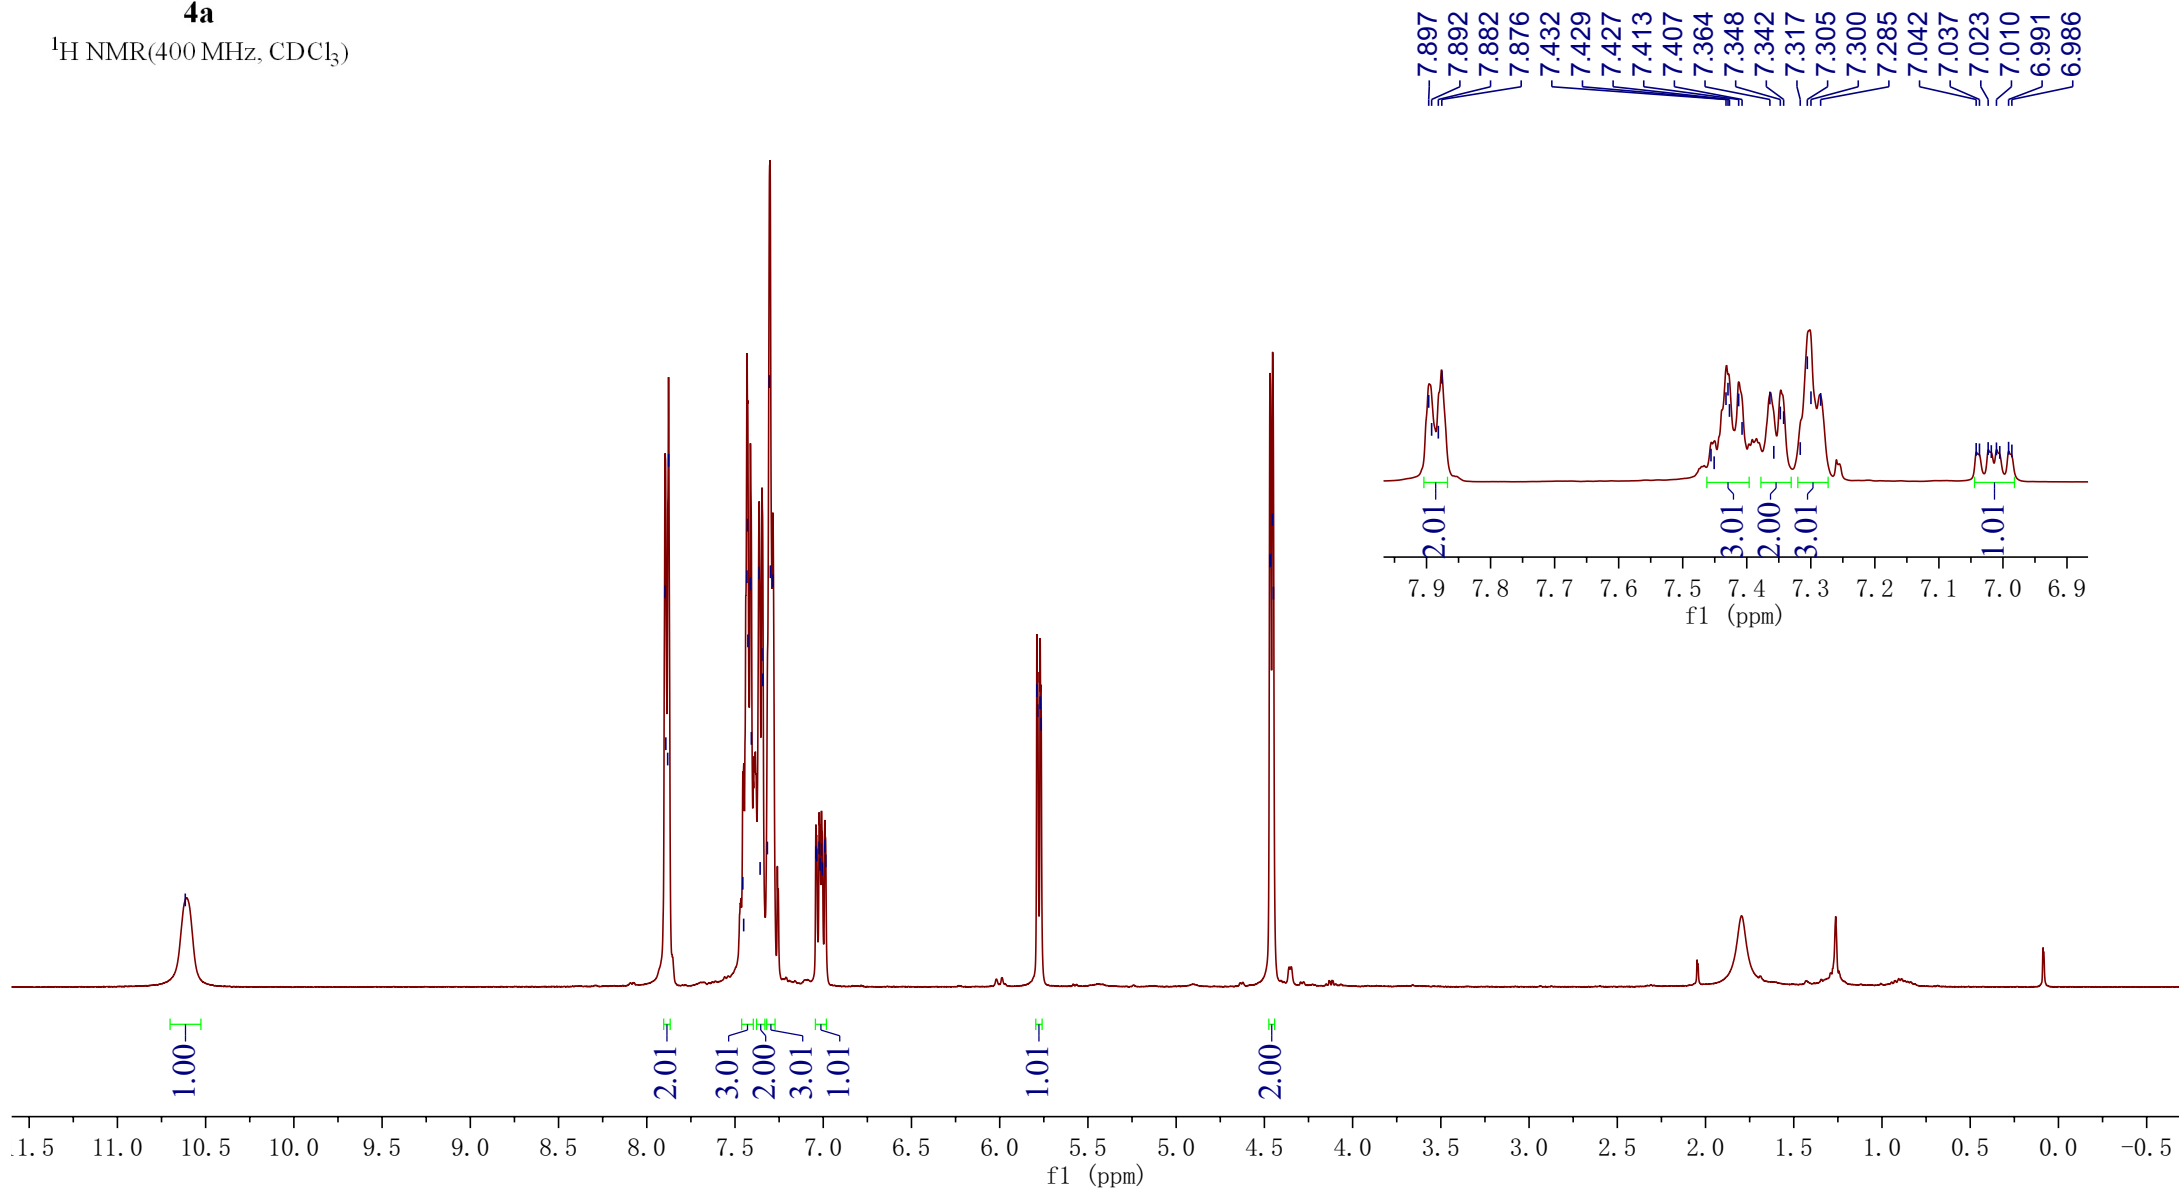

Supplement: d3cc06196e1.pdf [file d3cc06196e1.pdf]
